# Supplementary material for: Current situation and future perspectives for the use of fungi in the biomaterial industry and proposal for a new classification of fungal-derived materials
Source: PeerJ journal article supplement (doi:10.7717/peerj-matsci.31), 2023-08-29
Supplement: Sierra2023_PeerJ_supp_V3.docx [file Sierra2023_PeerJ_supp_V3.docx]

**Current situation and future perspectives for the use of fungi in the biomaterial industry and proposal for a new classification of fungal-derived materials**

Luz Alba Ballen Sierra1, Thairine Mendes-Pereira1, Glen Jasper Yupanqui García2, Carla Queiroga Werkhaizer3, Juliana Barros de Rezende3, Thiago Augusto Borges Rodrigues3, Fernanda Badotti4, Emanuelle Santos de Carvalho Cardoso5, Andréa Miura da Costa5, Ana Paula Trovatti Uetanabaro1,5, Maria Teresa Paulino Aguilar6, Aristóteles Góes-Neto1,2,3

**Supplementary Material**

**Table S1:** Search strategies and keywords selected for the screening of information that indicates related studies to bio-based materials.

| **Search 1** | |
| --- | --- |
| **Database** | **Keywords** |
| PubMed | (((Mycocomposite [Title/Abstract]) OR (Mycelium based composites [Title/Abstract]) OR (Composite foam mycelia[Title/Abstract]) OR (Mycelium-based materials[Title/Abstract]) OR (Fungal mycelium packaging [Title/Abstract]) OR (Myco Foam mushroom-based [Title/Abstract]) OR (Fungal Mycelium-Based Biofoam [Title/Abstract]) OR (Mycelium derived materials[Title/Abstract]) OR (Mycelium composites [Title/Abstract]) OR (Mycelium boards [Title/Abstract]) OR (Composite mycelium material [Title/Abstract]) OR (Mycelium material[Title/Abstract])) AND ((fungi [Title/Abstract]) OR (fungal [Title/Abstract]) OR (fungus [Title/Abstract]) OR (mycelium [Title/Abstract]) OR (mushroom [Title/Abstract]))) |
| Scopus | (TITLE-ABS-KEY("Mycocomposite" OR "Mycelium based composites" OR "Composite foam mycelia" OR "Mycelium-based materials" OR "Fungal mycelium packaging" OR "Myco Foam mushroom-based" OR "Fungal Mycelium-Based Biofoam" OR "Mycelium derived materials" OR "Mycelium composites" OR "Mycelium boards" OR "Composite mycelium material" OR "Mycelium material") AND TITLE-ABS-KEY("fungi" OR "fungal" OR "fungus" OR "mycelium" OR "mushroom")) |
| Web of Science | TS=(("Mycocomposite" OR "Mycelium based composites" OR "Composite foam mycelia" OR "Mycelium-based materials" OR "Fungal mycelium packaging" OR "Myco Foam mushroom-based" OR "Fungal Mycelium-Based Biofoam" OR "Mycelium derived materials" OR "Mycelium composites" OR "Mycelium boards" OR "Composite mycelium material" OR "Mycelium material") AND ("fungi" OR "fungal" OR "fungus" OR "mycelium" OR "mushroom")) |
| **Search 2** | |
| **Database** | **Keywords** |
| PubMed | ((((Mycocomposite [Title/Abstract]) OR (Fungal chitin nanofibers [Title/Abstract]) OR (Fungal chitin nanopapers [Title/Abstract]) OR (Fungal structural polymers [Title/Abstract]) OR (Fungal nanomaterials [Title/Abstract]) OR (fungal chitin nanomaterials [Title/Abstract]) OR (fungal glucan nanomaterials [Title/Abstract]) OR (Natural fungal chitin nanofibrils [Title/Abstract]) OR (Natural fungal chitosan nanofibrils [Title/Abstract])) OR (((Nanopapers [Title/Abstract]) OR (Chitosan glucan nanopapers [Title/Abstract])) AND (common white button mushroom [Title/Abstract]))) AND ((fungi [Title/Abstract]) OR (fungal [Title/Abstract]) OR (fungus [Title/Abstract]) OR (mycelium [Title/Abstract]) OR (mushroom [Title/Abstract]))) |
| Scopus | ((TITLE-ABS-KEY ("Mycocomposite" OR "Fungal chitin nanofibers" OR "Fungal chitin nanopapers" OR "Fungal structural polymers" OR "Fungal nanomaterials" OR "fungal chitin nanomaterials" OR "fungal glucan nanomaterials" OR "Natural fungal chitin nanofibrils" OR "Natural fungal chitosan nanofibrils") OR (TITLE-ABS-KEY ("Nanopapers" OR "Chitosan glucan nanopapers") AND TITLE-ABS-KEY ("common white button mushroom"))) AND TITLE-ABS-KEY ("fungi" OR "fungal" OR "fungus" OR "mycelium" OR "mushroom")) |
| Web of Science | TS=((("Mycocomposite" OR "Fungal chitin nanofibers" OR "Fungal chitin nanopapers" OR "Fungal structural polymers" OR "Fungal nanomaterials" OR "fungal chitin nanomaterials" OR "fungal glucan nanomaterials" OR "Natural fungal chitin nanofibrils" OR "Natural fungal chitosan nanofibrils") OR (("Nanopapers" OR "Chitosan glucan nanopapers") AND "common white button mushroom")) AND ("fungi" OR "fungal" OR "fungus" OR "mycelium" OR "mushroom")) |
| **Search 3** | |
| **Database** | **Keywords** |
| PubMed | (((Hybrid biocomposites from mycelium [Title/Abstract]) OR (Nanofiber mats, composite from fungal mycelium [Title/Abstract]) OR (Mycelium Hybrid Materials [Title/Abstract]) OR (Mycocel biopolymers [Title/Abstract]) OR (Fungal mycelium-nanocellulose [Title/Abstract])) AND ((fungi[Title/Abstract]) OR (fungal [Title/Abstract]) OR (fungus[Title/Abstract]) OR (mycelium [Title/Abstract]) OR (mushroom [Title/Abstract]))) |
| Scopus | (TITLE-ABS-KEY("Hybrid biocomposites from mycelium" OR "Nanofiber mats, composite from fungal mycelium" OR "Mycelium Hybrid Materials" OR "Mycocel biopolymers" OR "Fungal mycelium-nanocellulose") AND TITLE-ABS-KEY("fungi" OR "fungal" OR "fungus" OR "mycelium" OR "mushroom")) |
| Web of Science | TS=(((Hybrid biocomposites from mycelium) OR (Nanofiber mats, composite from fungal mycelium) OR (Mycelium Hybrid Materials) OR (Mycocel biopolymers) OR (Fungal mycelium-nanocellulose)) AND ((fungi) OR (fungal) OR (fungus) OR (mycelium) OR (mushroom))) |
| **Search 4** | |
| **Database** | **Keywords** |
| PubMed | (((Pure mycelium materials [Title/Abstract]) OR (Fungal skin [Title/Abstract]) OR (Mycelium films [Title/Abstract]) OR (Flexible Fungal Materials [Title/Abstract]) OR (fungal flexible materials [Title/Abstract]) OR (FFMs [Title/Abstract])) AND ((fungi [Title/Abstract]) OR (fungal [Title/Abstract]) OR (fungus [Title/Abstract]) OR (mycelium [Title/Abstract]) OR (mushroom [Title/Abstract]))) |
| Scopus | (TITLE-ABS-KEY ("Pure mycelium materials" OR "Fungal skin" OR "Mycelium films" OR "Flexible Fungal Materials" OR "fungal flexible materials" OR "FFMs") AND TITLE-ABS-KEY ("fungi" OR "fungal" OR "fungus" OR "mycelium" OR "mushroom")) |
| Web of Science | TS=(("Pure mycelium materials" OR "Fungal skin" OR "Mycelium films" OR "Flexible Fungal Materials" OR "fungal flexible materials" OR "FFMs") AND ("fungi" OR "fungal" OR "fungus" OR "mycelium" OR "mushroom")) |

**Table S2:** Inclusion and exclusion criteria for the literature review

| **Inclusion criteria** | **Description of potential applications** |
| --- | --- |
| Material application | Structuring in construction, sound or thermal insulation, furniture, packaging, textiles, reinforcing or structuring nanocomposites |
| Origin | Materials strictly derived from filamentous fungi |
| **Exclusion criteria** |  |
| Material application | Medical, food, nutraceutical or bioceutical applications |
| Origin | Materials derived from Bacteria, yeast or symbiotic culture of bacteria and yeast (SCOBY), or any of these in interactions with filamentous fungi |

**Table S3:** Wood-colonizing fungi that are able to produce Laccase enzymes used to reconstruct a phylogeny based on internal transcriber spacer.

**Table S4:** Other names used to describe mycocomposites, hybrid materials, and fungal chitin nanofibers in literature

| **Type of biomaterial** | **Synonyms** | **Reference** |
| --- | --- | --- |
| Mycocomposites | Mycelium-based composites | (Appels et al., 2019) |
| Composite foam mycelia | (Arifin & Yusuf, 2013) |
| Mycelium-based materials | (Lelivelt et al., 2015; Karana et al., 2018) |
| Fungal mycelium packaging | (Holt et al., 2012) |
| MycoFoam mushroom-based | (Macarthur, Waughray & Stuchtey, 2006) |
| Fungal Mycelium-Based Biofoam | (Yang et al., 2017) |
| Mycelium-derived materials | (Jones et al., 2020; Appels et al., 2020) |
| Mycelium composites | (Jones et al., 2020) |
| Mycelium boards | (Vasquez & Vega, 2019) |
| Composite mycelium material | (Appels et al., 2020) |
| Mycelium material | (Appels et al., 2020) |
| Hybrid Materials | Hybrid biocomposites from mycelium | (Attias et al., 2021) |
| Mycelium–nanocellulose biocomposite | (Attias et al., 2021) |
| Hybrid NC–mycelium biocomposites | (Attias et al., 2021) |
| Nanofiber mats, composite from fungal mycelium | (Sabantina et al., 2019) |
| Bio-based composites | (Sabantina et al., 2019) |
| PAN/mycelium composites | (Sabantina et al., 2019) |
| Mycelium Hybrid Materials | (Attias et al., 2021) |
| Mycocel biopolymers | (Irbe et al., 2021) |
| Fungal mycelium–nanocellulose | (Irbe et al., 2021) |
| Mycelium-reinforced nanocomposities | (Trabelsi et al., 2021) |
| Mycelium/PAN composites | (Trabelsi et al., 2021) |
| Mycelium-enhanced nanocomposites | (Trabelsi et al., 2021) |
| Bio-mycelium composites | (Trabelsi et al., 2021) |
| Mycelium-reinforced biocomposities | (Trabelsi et al., 2021) |
| Hybrid panel composites | (Sun et al., 2019) |
| Hybrid systems of wood, mycelium and CNF | (Sun et al., 2019) |
| HNT-fungus hybrids | (Ahn et al., 2020) |
| HNT-doped fungal mycelia hybrid | (Ahn et al., 2020) |
| Mycelium/BT hybrid materials | (Li et al., 2016) |
| Hybrid biological material | (Li et al., 2016) |
| Hybridisation of mycelium composites | (Elsacker et al., 2021) |
| Hybrid materials | (Elsacker et al., 2021) |
| Hybridisation of mycelium materials | (Elsacker et al., 2021) |
| Hybridization of mycelium materials | (Elsacker, De Laet & Peeters, 2022) |
| Fungal Chitin Nanofibers | Fungal microfilaments | (Jones et al., 2018) |
| Fungal biopolymers and the fungal biorefinery | (Jones et al., 2020) |
| Fungal chitin | (Janesch et al., 2019; Nawawi et al., 2020a) |
| Nanomaterials Derived from Fungal Sources | (Nawawi et al., 2020a, 2020b) |
| Chitin nanofibers from fungal | (Nawawi et al., 2020a) |
| Chitin nanopapers from a fungal | (Nawawi et al., 2020a) |
| Nanopapers derived from common white-button mushroom | (Nawawi et al., 2020b) |
| Chitosan-glucan nanopapers derived from common white button mushroom | (Nawawi et al., 2020b) |
| Fungal chitin nanofibers | (Janesch et al., 2019) |
| Fungal structural polymers | (Nawawi et al., 2020b) |
| Fungal nanomaterials | (Nawawi et al., 2020b) |
| Chitin/ glucan nanomaterials | (Appels et al., 2020) |
| Natural nanofibrils (chitin and chitosan), | (Jones et al., 2018) |
| Fungal chitin-glucan nanopapers | (Yousefi et al., 2021) |
| FChNF. Nanopapers | (Yousefi et al., 2021) |
| Nanofibers obtained from mushrooms | (Zin, Jimat & Nawawi, 2022) |
| Chitin Nanofibers (ChNF) | (Salehinik et al., 2021) |
| (FChNF) Fungal Chitin Nanofibers | (Nawawi et al., 2020b) |
| Chitinous materials and nanofibers derived from fungal mycelium | (Jones et al., 2018) |
| Chitinous composites and nanofibers | (Jones et al., 2018) |

**References**

Ahn H, Rehman JU, Kim T, Oh MS, Yoon HY, Kim C, Lee Y, Shin SG, Jeon J-R. 2020. Fungal mycelia functionalization with halloysite nanotubes for hyphal spreading and sorption behavior regulation: A new bio-ceramic hybrid for enhanced water treatment. *Water Research* 186:116380. DOI: 10.1016/j.watres.2020.116380.

Appels FVW, van den Brandhof JG, Dijksterhuis J, de Kort GW, Wösten HAB. 2020. Fungal mycelium classified in different material families based on glycerol treatment. *Communications Biology* 3:334. DOI: 10.1038/s42003-020-1064-4.

Appels FVW, Camere S, Montalti M, Karana E, Jansen KMB, Dijksterhuis J, Krijgsheld P, Wösten HAB. 2019. Fabrication factors influencing mechanical, moisture- and water-related properties of mycelium-based composites. *Materials & Design* 161:64–71. DOI: 10.1016/j.matdes.2018.11.027.

Arifin YH, Yusuf Y. 2013. Mycelium Fibers as New Resource for Environmental Sustainability. *Procedia Engineering* 53:504–508. DOI: 10.1016/j.proeng.2013.02.065.

Attias N. 2020. Mycelium bio-composites in industrial design and architecture: Comparative review and experimental analysis. *Journal of cleaner production* v. 246:119037-. DOI: 10.1016/j.jclepro.2019.119037.

Attias N, Reid M, Mijowska SC, Dobryden I, Isaksson M, Pokroy B, Grobman YJ, Abitbol T. 2021. Biofabrication of Nanocellulose–Mycelium Hybrid Materials. *Adv. Sustainable Syst*. 5 (2). 2000196. https://doi.org/10.1002/adsu.202000196.

Elsacker E, De Laet L, Peeters E. 2022. Functional Grading of Mycelium Materials with Inorganic Particles: The Effect of Nanoclay on the Biological, Chemical and Mechanical Properties. *Biomimetics* 7:57. DOI: 10.3390/biomimetics7020057.

Elsacker E, Søndergaard A, Van Wylick A, Peeters E, De Laet L. 2021. Growing living and multifunctional mycelium composites for large-scale formwork applications using robotic abrasive wire-cutting. *Construction and Building Materials* 283:122732. DOI: 10.1016/j.conbuildmat.2021.122732.

Holt GA, Mcintyre G, Flagg D, Bayer E, Wanjura JD, Pelletier MG. 2012. Fungal Mycelium and Cotton Plant Materials in the Manufacture of Biodegradable Molded Packaging Material: Evaluation Study of Select Blends of Cotton Byproducts. *Journal of Biobased Materials and Bioenergy* 6:431–439. DOI: 10.1166/jbmb.2012.1241.

Irbe I, Filipova I, Skute M, Zajakina A, Spunde K, Juhna T. 2021. Characterization of Novel Biopolymer Blend Mycocel from Plant Cellulose and Fungal Fibers. *Polymers* 13:1086. DOI: 10.3390/polym13071086.

Janesch J, Jones MP, Bacher M, Kontturi E, Bismarck A, Mautner A. 2019. Mushroom-derived chitosan-glucan nanopaper filters for the treatment of water. *Reactive and Functional Polymers* 146:104428. DOI: 10.1016/j.reactfunctpolym.2019.104428.

Jones M, Huynh T, John S. 2018. Inherent species characteristic influence and growth performance assessment for mycelium composite applications. *Advanced Materials Letters* 9:71–80. DOI: 10.5185/amlett.2018.1977.

Jones M, Mautner A, Luenco S, Bismarck A, John S. 2020. Engineered mycelium composite construction materials from fungal biorefineries: A critical review. *Materials & Design* 187:108397. DOI: 10.1016/j.matdes.2019.108397.

Karana E, Blauwhoff D, Hultink E-J, Camere S. 2018. When the Material Grows: A Case Study on Designing (with) Mycelium-based Materials. *International Journal of Design*, 12(2).

Lelivelt RJJ, Lindner G, Teuffel P, Lamers H. 2015. The production process and compressive strength of Mycelium-based materials. *First International Conference on Bio-based Building Materials. 22-25 June 2015, Clermont-Ferrand, France*:1–6.

Li W, Yao W, Zhu W, Xi C, Duan T. 2016. In situ preparation of mycelium/bayberry tannin for the removal of strontium from aqueous solution. *Journal of Radioanalytical and Nuclear Chemistry* 310:495–504. DOI: 10.1007/s10967-016-4808-3.

Macarthur DE, Waughray D, Stuchtey MR. 2006.The New Plastics Economy: Rethinking the future of plastics. *Available at* *https://ellenmacarthurfoundation.org/the-new-plastics-economy-rethinking-the-future-of-plastics* (accessed December 21, 2022).

Nawawi WMFW, Jones MP, Kontturi E, Mautner A, Bismarck A. 2020a. Plastic to elastic: Fungi-derived composite nanopapers with tunable tensile properties. *Composites Science and Technology* 198:108327. DOI: 10.1016/j.compscitech.2020.108327.

Nawawi WMFBW, Jones M, Murphy RJ, Lee K-Y, Kontturi E, Bismarck A. 2020b. Nanomaterials Derived from Fungal Sources—Is It the New Hype? *Biomacromolecules* 21:30–55. DOI: 10.1021/acs.biomac.9b01141.

Sabantina L, Kinzel F, Hauser T, Többer A, Klöcker M, Döpke C, Böttjer R, Wehlage D, Rattenholl A, Ehrmann A. 2019. Comparative Study of Pleurotus ostreatus Mushroom Grown on Modified PAN Nanofiber Mats. *Nanomaterials* 9:475. DOI: 10.3390/nano9030475.

Salehinik F, Behzad T, Zamani A, Bahrami B. 2021. Extraction and characterization of fungal chitin nanofibers from Mucor indicus cultured in optimized medium conditions. *International Journal of Biological Macromolecules* 167:1126–1134. DOI: 10.1016/j.ijbiomac.2020.11.066.

Sun W, Tajvidi M, Hunt CG, McIntyre G, Gardner DJ. 2019. Fully Bio-Based Hybrid Composites Made of Wood, Fungal Mycelium and Cellulose Nanofibrils. *Scientific Reports* 9:3766. DOI: 10.1038/s41598-019-40442-8.

Trabelsi M, Mamun A, Klöcker M, Brockhagen B, Kinzel F, Kapanadze D, Sabantina L. 2021. Polyacrylonitrile (PAN) nanofiber mats for mushroom mycelium growth investigations and formation of mycelium-reinforced nanocomposites. *Journal of Engineered Fibers and Fabrics* 16:15589250211037982. DOI: 10.1177/15589250211037982.

Vasquez ESL, Vega K. 2019. From plastic to biomaterials: prototyping DIY electronics with mycelium. In: *Adjunct Proceedings of the 2019 ACM International Joint Conference on Pervasive and Ubiquitous Computing and Proceedings of the 2019 ACM International Symposium on Wearable Computers*. UbiComp/ISWC ’19 Adjunct. New York, NY, USA: Association for Computing Machinery, 308–311. DOI: 10.1145/3341162.3343808.

Yang Z (Joey), Zhang F, Still B, White M, Amstislavski P. 2017. Physical and Mechanical Properties of Fungal Mycelium-Based Biofoam. *Journal of Materials in Civil Engineering* 29:04017030. DOI: 10.1061/(ASCE)MT.1943-5533.0001866.

Yousefi N, Jones M, Bismarck A, Mautner A. 2021. Fungal chitin-glucan nanopapers with heavy metal adsorption properties for ultrafiltration of organic solvents and water. *Carbohydrate Polymers* 253:117273. DOI: 10.1016/j.carbpol.2020.117273.

Zin MI, Jimat DN, Nawawi WMF. 2022. Physicochemical properties of fungal chitin nanopaper from shiitake (L. edodes), enoki (F. velutipes) and oyster mushrooms (P. ostreatus). *Carbohydrate Polymers* 281:119038. DOI: 10.1016/j.carbpol.2021.119038.
