# Supplementary material for: Current situation and future perspectives for the use of fungi in the biomaterial industry and proposal for a new classification of fungal-derived materials
Source: PeerJ journal article supplement (doi:10.7717/peerj-matsci.31), 2023-08-29
Supplement: Sierra2023_RawdataV2.xlsx [file Sierra2023_RawdataV2.xlsx]

## Sheet: FungalMicrofilaments_unique
Item	Title	Abstract	Year	DOI	Document Type	Language	Cited By	Author(s)	Repository
1	Nanoparticle and nanomineral production by fungi	Fungi show a variety of abilities in affecting metal speciation, toxicity, and mobility and mineral formation, dissolution or deterioration through several interacting biomechanical and biochemical mechanisms. A consequence of many metal-mineral interactions is the production of nanoparticles which may be in elemental, mineral or compound forms. Organisms may benefit from such nanomaterial format…	2022	10.1016/j.fbr.2021.07.003	Article	English	10	Li Q., Liu F., Li M., Chen C., Gadd G.M.	Scopus/Web of Science
2	MYCELIUM-BASED COMPOSITE: A WAY FORWARD FOR RENEWABLE MATERIAL	The fluctuation of petroleum prices, fast depletion of fossil resources and environmental problems are caused by polymer derived from petroleum or natural gas due to its non-renewable and non-biodegradable properties. Recently, the industry has emphasised designing sustainable biocomposite using eco-friendly, renewable, biodegradable and low energy consumption during the manufacturing process. Th…	2022	10.46754/jssm.2022.01.018	Article	English	4	Fairus M.J.M., Bahrin E.K., Arbaain E.N.N., Ramli N.	Scopus
3	Fungal chitin-glucan nanopapers with heavy metal adsorption properties for ultrafiltration of organic solvents and water	Membranes and filters are essential devices, both in the laboratory for separation of media, solvent recovery, organic solvent and water filtration purposes, and in industrial scale applications, such as the removal of industrial pollutants, e.g. heavy metal ions, from water. Due to their solvent stability, biologically sourced and renewable membrane or filter materials, such as cellulose or chit…	2021	10.1016/j.carbpol.2020.117273	Article	English	31	Yousefi N., Jones M., Bismarck A., Mautner A.	Scopus/Web of Science/PubMed
4	Extraction and characterization of fungal chitin nanofibers from Mucor indicus cultured in optimized medium conditions	Chitin nanofibers (ChNFs) were extracted from Mucor indicus by a purification method followed by a mechanical treatment, cultivated under obtained optimum culture medium conditions to improve fungal chitin production rate. A semi synthetic media containing 50 g/l glucose was used for cultivation of the fungus in shake flasks. The cell wall analysis showed that N-acetyl glucosamine (GlcNAc) conten…	2021	10.1016/j.ijbiomac.2020.11.066	Article	English	4	Salehinik F., Behzad T., Zamani A., Bahrami B.	Scopus/Web of Science/PubMed
5	Mushroom-derived chitosan-glucan nanopaper filters for the treatment of water	Contaminated water represents a significant threat to public health, with heavy metals present in industrial effluents constituting a particular hazard. Conventional heavy metal removal processes are often expensive and rely on synthetic materials. Renewable adsorbents or filters, such as chitosan, provide a low-cost, simple alternative for treatment of water. Fungal chitin and hence fungal chito…	2020	10.1016/j.reactfunctpolym.2019.104428	Article	English	30	Janesch J., Jones M., Bacher M., Kontturi E., Bismarck A., Mautner A.	Scopus/Web of Science
6	Fungal nanobionics: Principles and applications	Fungal nanobionics has great prospects for developing new products with industrial, agriculture, medicine and consumer applications in a wide range of sectors. The fields of chemical engineering, agri-food, biochemical, pharmaceuticals, diagnostics and medical device development all employ fungal products, with fungal nanomaterials currently used in a wide range of applications, ranging from drug…	2018	10.1007/978-981-10-8666-3	Book	English	42	Prasad R., Kumar V., Kumar M., Wang S.	Scopus
7	Toward Nanotechnology-Enabled Approaches against the COVID-19 Pandemic		2020	10.1021/acsnano.0c03697	Article	English	391	Weiss C, Carriere M, Fusco L, Capua I, Regla-Nava JA, Pasquali M, Scott JA, Vitale F, Unal MA, Mattevi C, Bedognetti D, Merkoçi A, Tasciotti E, Yilmazer A, Gogotsi Y, Stellacci F, Delogu LG.	PubMed
8	Zinc oxide nanoparticles: Synthesis, antiseptic activity and toxicity mechanism		2017	10.1016/j.cis.2017.07.033	Article	English	359	Król A, Pomastowski P, Rafińska K, Railean-Plugaru V, Buszewski B.	PubMed
9	Surface properties of chitin-glucan nanopapers from Agaricus bisporus		2020	10.1016/j.ijbiomac.2020.01.141	Article	English	22	Nawawi WMFW, Lee KY, Kontturi E, Bismarck A, Mautner A.	PubMed
10	Waste-Derived Low-Cost Mycelium Nanopapers with Tunable Mechanical and Surface Properties		2019	10.1021/acs.biomac.9b00791	Article	English	37	Jones M, Weiland K, Kujundzic M, Theiner J, Kählig H, Kontturi E, John S, Bismarck A, Mautner A.	PubMed
11	Fungal Hydrophobins and Their Self-Assembly into Functional Nanomaterials		2019	10.1007/978-981-13-9791-2_5	Book Chapter		9	Lo V, I-Chun Lai J, Sunde M.	PubMed
12	Synthesis and applications of biogenic nanomaterials in drinking and wastewater treatment		2019	10.1016/j.jenvman.2018.10.104	Article	English	77	Gautam PK, Singh A, Misra K, Sahoo AK, Samanta SK.	PubMed
13	Nanomaterials and microbes' interactions: a contemporary overview		2019	10.1007/s13205-019-1576-0	Article	English	40	Singh J, Vishwakarma K, Ramawat N, Rai P, Singh VK, Mishra RK, Kumar V, Tripathi DK, Sharma S.	PubMed
14	Nephrotoxicity: Topical issue		2019	10.1016/j.mrgentox.2018.11.012	Article	English	4	Gabelova A, Kozics K, Kapka-Skrzypczak L, Kruszewski M, Sramkova M.	PubMed
15	Nanoparticles for Antimicrobial Agents Delivery-An Up-to-Date Review	Infectious diseases constitute an increasing threat to public health and medical systems worldwide. Particularly, the emergence of multidrug-resistant pathogens has left the pharmaceutical arsenal unarmed to fight against such severe microbial infections. Thus, the context has called for a paradigm shift in managing bacterial, fungal, viral, and parasitic infections, leading to the collision of m…	2022	10.3390/ijms232213862	Article	English	3	Mercan DA, Niculescu AG, Grumezescu AM.	PubMed
16	Engineered chitosan based nanomaterials: Bioactivities, mechanisms and perspectives in plant protection and growth		2018	10.1016/j.ijbiomac.2018.02.130	Article	English	134	Kumaraswamy RV, Kumari S, Choudhary RC, Pal A, Raliya R, Biswas P, Saharan V.	PubMed
17	Catalytic antimicrobial therapy using nanozymes		2022	10.1002/wnan.1769	Article	English	10	Wang Q, Jiang J, Gao L.	PubMed
18	White rot fungi and advanced combined biotechnology with nanomaterials: promising tools for endocrine-disrupting compounds biotransformation		2018	10.1080/07388551.2017.1386613	Article	English	49	Huang D, Guo X, Peng Z, Zeng G, Xu P, Gong X, Deng R, Xue W, Wang R, Yi H, Liu C.	PubMed
19	Influence of glucan on physicochemical and rheology properties of chitin nanofibers prepared from Shiitake stipes		2022	10.1016/j.carbpol.2022.119762	Article	English	1	Zhang M, Zhao K, Zhang K, Wang W, Xing J, Li Y.	PubMed
20	Structure, bioactivity and applications of natural hyperbranched polysaccharides		2019	10.1016/j.carbpol.2019.115076	Article	English	64	Chen L, Ge MD, Zhu YJ, Song Y, Cheung PCK, Zhang BB, Liu LM.	PubMed
21	Nano Silver-Induced Toxicity and Associated Mechanisms		2022	10.2147/ijn.s355131	Article	English	12	Zhang J, Wang F, Yalamarty SSK, Filipczak N, Jin Y, Li X.	PubMed
22	Nanomaterials Derived from Fungal Sources-Is It the New Hype?		2020	10.1021/acs.biomac.9b01141	Article	English	52	Nawawi WMFBW, Jones M, Murphy RJ, Lee KY, Kontturi E, Bismarck A.	PubMed
23	Nanomaterials enabling clinical translation of antimicrobial photodynamic therapy		2022	10.1016/j.jconrel.2022.04.035	Article	English	12	Awad M, Thomas N, Barnes TJ, Prestidge CA.	PubMed
24	Silver-based nanocomposite for fabricating high performance value-added cotton		2022	10.1007/s10570-021-04257-z	Article	English	6	Huang C, Cai Y, Chen X, Ke Y.	PubMed
25	Greener synthesis of chemical compounds and materials	Modern trends in the greener synthesis and fabrication of inorganic, organic and coordination compounds, materials, nanomaterials, hybrids and nanocomposites are discussed. Green chemistry deals with synthesis procedures according to its classic 12 principles, contributing to the sustainability of chemical processes, energy savings, lesser toxicity of reagents and final products, lesser damage to…	2019	10.1098/rsos.191378	Article	English	158	Kharissova OV, Kharisov BI, Oliva González CM, Méndez YP, López I.	PubMed
26	Implications of molecular diversity of chitin and its derivatives		2017	10.1007/s00253-017-8229-1	Article	English	39	Khan FI, Rahman S, Queen A, Ahamad S, Ali S, Kim J, Hassan MI.	PubMed
27	Myco-decontamination of azo dyes: nano-augmentation technologies		2020	10.1007/s13205-020-02378-z	Article	English	11	Kalia A, Singh S.	PubMed
28	Metal complexes containing natural and and artificial radioactive elements and their applications		2014	10.3390/molecules190810755	Article	English	13	Kharissova OV, Méndez-Rojas MA, Kharisov BI, Méndez UO, Martínez PE.	PubMed
29	Plant Resistance to Fungal Pathogens: Bibliometric Analysis and Visualization	Plants are susceptible to fungal pathogen infection, threatening plant growth and development. Researchers worldwide have conducted extensive studies to address this issue and have published numerous articles on the subject, but they lack a scientometric evaluation. This study analyzed international research on the topic “Plant resistance to fungal pathogens” between 2008 and 2021, using the core…	2022	10.3390/toxics10100624	Article	English	0	Tang Y, He G, He Y, He T.	PubMed
30	Mycosynthesis of silver nanoparticles: a review		2022	10.1007/s10534-022-00479-1	Article	English	0	Beltrán Pineda ME, Lizarazo Forero LM, Sierra YCA.	PubMed
31	Green Synthesis of Nanomaterials	Nanotechnology is considered one of the paramount forefronts in science over the last decade. Its versatile implementations and fast-growing demand have paved the way for innovative measures for the synthesis of higher quality nanomaterials. In the early stages, traditional synthesis methods were utilized, and they relied on both carcinogenic chemicals and high energy input for production of nano…	2021	10.3390/nano11082130	Article	English	38	Huston M, DeBella M, DiBella M, Gupta A.	PubMed
32	Biotemplate-Mediated Green Synthesis and Applications of Nanomaterials	<jats:title /> Green synthesis, an emerging field in bionanotechnology, refers to the utilization of non-toxic, biologically safe, and eco-friendly substances for the synthesis of desired materials. It provides both economic and environmental benefits along with simple, cost-effective, and reproducible synthesis approaches that result in the development of stable materials. The green synthesis ap…	2020	10.2174/1381612824999201105164531	Article	English	8	Ullah MW, Manan S, Khattak WA, Shahzad A, Ul-Islam M, Yang G.	PubMed
33	Halloysite nanotubes - the nano-bio interface	<p>The unique bio-nano interface of halloysite nanotubes with cellular systems and its impact on potential biotechnological and biomedical applications is presented and critically reviewed.</p>	2020	10.1039/d0nr06820a	Article	English	40	Prinz Setter O , Segal E .	PubMed
34	Nanomaterials: new weapons in a crusade against phytopathogens		2020	10.1007/s00253-019-10334-y	Article	English	36	Rajwade JM, Chikte RG, Paknikar KM.	PubMed
35	Biosynthesis and bioapplications of nanomaterials from mushroom products	Abstract:: The production of nanoparticles (NPs) from chemical and physical synthesis has ended due to the involvement of toxic byproducts and harsh analytical conditions. Innovation and research in nanoparticle synthesis are derived from biomaterials that have gained attention due to their novel features, such as ease of synthesis, low-cost, eco-friendly approach, and high water solubility. Nano…	2023	10.2174/1381612829666230417083133	Article	English	0	Rai SN, Mishra D, Singh P, Singh MP, Vamanu E, Petre A.	PubMed
36	Biosynthesis of inorganic nanomaterials using microbial cells and bacteriophages		2020	10.1038/s41570-020-00221-w	Article	English	65	Choi Y, Lee SY.	PubMed
37	Two-Dimensional Layered Nanomaterial-Based Electrochemical Biosensors for Detecting Microbial Toxins	Toxin detection is an important issue in numerous fields, such as agriculture/food safety, environmental monitoring, and homeland security. During the past two decades, nanotechnology has been extensively used to develop various biosensors for achieving fast, sensitive, selective and on-site analysis of toxins. In particular, the two dimensional layered (2D) nanomaterials (such as graphene and tr…	2019	10.3390/toxins12010020	Article	English	21	Li Z, Li X, Jian M, Geleta GS, Wang Z.	PubMed
38	Bio-inspired nanomaterials in agriculture and food: Current status, foreseen applications and challenges		2018	10.1016/j.micpath.2018.07.013	Article	English	39	Chaudhry N, Dwivedi S, Chaudhry V, Singh A, Saquib Q, Azam A, Musarrat J.	PubMed
39	Engineered nanomaterials in plant diseases: can we combat phytopathogens?		2022	10.1007/s00253-021-11725-w	Article	English	4	Avila-Quezada GD, Golinska P, Rai M.	PubMed
40	Marine-Bioinspired Nanoparticles as Potential Drugs for Multiple Biological Roles	The increased interest in nanomedicine and its applicability for a wide range of biological functions demands the search for raw materials to create nanomaterials. Recent trends have focused on the use of green chemistry to synthesize metal and metal-oxide nanoparticles. Bioactive chemicals have been found in a variety of marine organisms, including invertebrates, marine mammals, fish, algae, pla…	2022	10.3390/md20080527	Article	English	9	Jeong GJ, Khan S, Tabassum N, Khan F, Kim YM.	PubMed
41	Review and Prospects on the Ecotoxicity of Mixtures of Nanoparticles and Hybrid Nanomaterials		2022	10.1021/acs.est.2c03333	Article	English	14	Zhang F, Wang Z, Peijnenburg WJGM, Vijver MG.	PubMed
42	Microbial-enabled green biosynthesis of nanomaterials: Current status and future prospects		2022	10.1016/j.biotechadv.2022.107914	Article	English	10	Yang Y, Waterhouse GIN, Chen Y, Sun-Waterhouse D, Li D.	PubMed
43	Mycosynthesis of Metal-Containing Nanoparticles-Fungal Metal Resistance and Mechanisms of Synthesis	In the 21st century, nanomaterials play an increasingly important role in our lives with applications in many sectors, including agriculture, biomedicine, and biosensors. Over the last two decades, extensive research has been conducted to find ways to synthesise nanoparticles (NPs) via mediation with fungi or fungal extracts. Mycosynthesis can potentially be an energy-efficient, highly adjustable…	2022	10.3390/ijms232214084	Article	English	2	Šebesta M, Vojtková H, Cyprichová V, Ingle AP, Urík M, Kolenčík M.	PubMed
44	Phage nanoparticle as a carrier for controlling fungal infection		2022	10.1007/s00253-022-11932-z	Article	English	1	Xu S, Zhang G, Wang M, Lin T, Liu W, Wang Y.	PubMed
45	Microbial Nano-Factories: Synthesis and Biomedical Applications	In the recent times, nanomaterials have emerged in the field of biology, medicine, electronics, and agriculture due to their immense applications. Owing to their nanoscale sizes, they present large surface/volume ratio, characteristic structures, and similar dimensions to biomolecules resulting in unique properties for biomedical applications. The chemical and physical methods to synthesize nanop…	2021	10.3389/fchem.2021.626834	Article		48	Ghosh S, Ahmad R, Zeyaullah M, Khare SK.	PubMed
46	Review on Nanomaterials and Nano-Scaled Systems for Topical and Systemic Delivery of Antifungal Drugs		2022	10.2147/jmdh.s359282	Article	English	3	Nagasa GD, Belete A.	PubMed
47	Carbon Dots for Killing Microorganisms: An Update since 2019	Frequent bacterial/fungal infections and occurrence of antibiotic resistance pose increasing threats to the public and thus require the development of new antibacterial/antifungal agents and strategies. Carbon dots (CDs) have been well demonstrated to be promising and potent antimicrobial nanomaterials and serve as potential alternatives to conventional antibiotics. In recent years, great efforts…	2022	10.3390/ph15101236	Article	English	2	Lin F, Wang Z, Wu FG.	PubMed
48	Nanobioremediation: A sustainable approach for the removal of toxic pollutants from the environment		2022	10.1016/j.jhazmat.2021.128033	Article	English	30	Bhatt P, Pandey SC, Joshi S, Chaudhary P, Pathak VM, Huang Y, Wu X, Zhou Z, Chen S.	PubMed
49	Food safety		2010	10.1007/s12016-009-8176-4	Article	English	98	Borchers A, Teuber SS, Keen CL, Gershwin ME.	PubMed
50	Antimicrobial Metal Nanomaterials: From Passive to Stimuli-Activated Applications		2020	10.1002/advs.201902913	Article	English	134	Cheeseman S, Christofferson AJ, Kariuki R, Cozzolino D, Daeneke T, Crawford RJ, Truong VK, Chapman J, Elbourne A.	PubMed
51	Antimicrobial Application of Chitosan Derivatives and their Nanocomposites	Abstract:: Chitosan is derived from chitin polysaccharide, the main component of crustacean shells. Chitosan is a biocompatible, nontoxic, and biodegradable polymer soluble in acidic solutions. It is widely used in the medical and pharmaceutical fields. Antimicrobial activities of chitosan against different bacterial, fungal, and viral pathogens have been considered one of its attractive properti…	2023	10.2174/0929867329666220803114729	Article	English	1	Lin X, Gong X, Ruan Q, Xu W, Zhang C, Zhao K.	PubMed
52	Noble metal nanomaterial-based aptasensors for microbial toxin detection		2020	10.38212/2224-6614.1155	Article	English	7	He Y, Wen CY, Guo ZJ, Huang YF.	PubMed
53	Assembly of fungal mycelium-carbon nanotube composites and their application in pyrene removal		2021	10.1016/j.jhazmat.2021.125743	Article	English	12	Zhou H, Li X, Hu B, Wu M, Zhang Y, Yi X, Liu Y.	PubMed
54	Fungi-assisted silver nanoparticle synthesis and their applications		2018	10.1007/s00449-017-1846-3	Article	English	115	Khan AU, Malik N, Khan M, Cho MH, Khan MM.	PubMed
55	Approaches for the inhibition and elimination of microbial biofilms using macromolecular agents	<p>Macromolecular entities, such as polymers, peptides, proteins, and hybrid materials thereof, are herein reviewed as promising antibiofilm agents.</p>	2021	10.1039/d0cs00986e	Article	English	55	Blackman LD, Qu Y, Cass P, Locock KES.	PubMed
56	Therapeutic and diagnostic potential of nanomaterials for enhanced biomedical applications		2019	10.1016/j.colsurfb.2019.05.008	Article	English	127	Abd Elkodous M, El-Sayyad GS, Abdelrahman IY, El-Bastawisy HS, Mohamed AE, Mosallam FM, Nasser HA, Gobara M, Baraka A, Elsayed MA, El-Batal AI.	PubMed
57	Chitin nanofibers trigger membrane bound defense signaling and induce elicitor activity in plants		2021	10.1016/j.ijbiomac.2021.02.164	Article	English	7	Um-E-Aiman, Nisar N, Tsuzuki T, Lowe A, Rossiter JT, Javaid A, Powell G, Waseem R, Al-Mijalli SH, Iqbal M.	PubMed
58	Biomolecule-derived quantum dots for sustainable optoelectronics	<p>The recent advances in sustainable optoelectronics applications of quantum dots derived from different biomolecules are documented in this review.</p>	2018	10.1039/c8na00332g	Article	English	32	Bhandari S, Mondal D, Nataraj SK, Balakrishna RG.	PubMed
59	Biosustainable production of nanoparticles via mycogenesis for biotechnological applications: A critical review		2022	10.1016/j.envres.2021.111963	Article	English	10	Sudheer S, Bai RG, Muthoosamy K, Tuvikene R, Gupta VK, Manickam S.	PubMed
60	Insights into biogenic and chemical production of inorganic nanomaterials and nanostructures		2013	10.1016/j.cis.2012.12.001	Article	English	147	Faramarzi MA, Sadighi A.	PubMed
61	Recent advances in topical carriers of anti-fungal agents		2020	10.1016/j.heliyon.2020.e04663	Article	English	22	Garg A, Sharma GS, Goyal AK, Ghosh G, Si SC, Rath G.	PubMed
62	Fungal β-Glucan-Based Nanotherapeutics: From Fabrication to Application	Fungal β-glucans are naturally occurring active macromolecules used in food and medicine due to their wide range of biological activities and positive health benefits. Significant research efforts have been devoted over the past decade to producing fungal β-glucan-based nanomaterials and promoting their uses in numerous fields, including biomedicine. Herein, this review offers an up-to-date repor…	2023	10.3390/jof9040475	Article	English	0	Yang F, Cheung PCK.	PubMed
63	Nanomaterial-based electrochemical sensors and biosensors for the detection of pharmaceutical compounds		2021	10.1016/j.bios.2020.112836	Article	English	125	Qian L, Durairaj S, Prins S, Chen A.	PubMed
64	Zinc Oxide Nanoparticles and Their Biosynthesis: Overview	Zinc (Zn) is plant micronutrient, which is involved in many physiological functions, and an inadequate supply will reduce crop yields. Its deficiency is the widest spread micronutrient deficiency problem; almost all crops and calcareous, sandy soils, as well as peat soils and soils with high phosphorus and silicon content are expected to be deficient. In addition, Zn is essential for growth in an…	2022	10.3390/life12040594	Article	English	21	Al Jabri H, Saleem MH, Rizwan M, Hussain I, Usman K, Alsafran M.	PubMed
65	Recent advances of emerging green chitosan-based biomaterials with potential biomedical applications: A review		2021	10.1016/j.carres.2021.108368	Article	English	53	Khan A, Alamry KA.	PubMed
66	Biogenic metallic nanoparticles as enzyme mimicking agents	The use of biological systems such as plants, bacteria, and fungi for the synthesis of nanomaterials has emerged to fill the gap in the development of sustainable methods that are non-toxic, pollution-free, environmentally friendly, and economical for synthesizing nanomaterials with potential in biomedicine, biotechnology, environmental science, and engineering. Current research focuses on unders…	2023	10.3389/fchem.2023.1107619	Article		0	Ngcongco K, Krishna SBN, Pillay K.	PubMed
67	Antioxidant Functionalized Nanoparticles: A Combat against Oxidative Stress	Numerous abiotic stresses trigger the overproduction of reactive oxygen species (ROS) that are highly toxic and reactive. These ROS are known to cause damage to carbohydrates, DNA, lipids and proteins, and build the oxidative stress and results in the induction of various diseases. To resolve this issue, antioxidants molecules have gained significant attention to scavenge these free radicals and …	2020	10.3390/nano10071334	Article	English	69	Kumar H, Bhardwaj K, Nepovimova E, Kuča K, Dhanjal DS, Bhardwaj S, Bhatia SK, Verma R, Kumar D.	PubMed
68	Tumor-targeting inorganic nanomaterials synthesized by living cells	<p>Inorganic nanomaterials (NMs) synthesized by living cells have shown potential application in tumor-targeting theranostics, owing to their unique physicochemical properties.</p>	2021	10.1039/d1na00155h	Article	English	5	Yao Y, Wang D, Hu J, Yang X.	PubMed
69	Bioengineered materials with selective antimicrobial toxicity in biomedicine	Abstract: Fungi and bacteria afflict humans with innumerous pathogen-related infections and ailments. Most of the commonly employed microbicidal agents target commensal and pathogenic microorganisms without discrimination. To distinguish and fight the pathogenic species out of the microflora, novel antimicrobials have been developed that selectively target specific bacteria and fungi. The cell wa…	2023	10.1186/s40779-023-00443-1	Article	English	0	Makvandi P, Song H, Yiu CKY, Sartorius R, Zare EN, Rabiee N, Wu WX, Paiva-Santos AC, Wang XD, Yu CZ, Tay FR.	PubMed
70	Low-Dimension Nanomaterial-Based Sensing Matrices for Antibiotics Detection: A Mini Review		2020	10.3389/fchem.2020.00551	Article		10	Dong Y, Li F, Wang Y.	PubMed
71	Emerging applications of nanotechnology in context to immunology: A comprehensive review	Numerous benefits of nanotechnology are available in many scientific domains. In this sense, nanoparticles serve as the fundamental foundation of nanotechnology. Recent developments in nanotechnology have demonstrated that nanoparticles have enormous promise for use in almost every field of life sciences. Nanoscience and nanotechnology use the distinctive characteristics of tiny nanoparticles (NP…	2022	10.3389/fbioe.2022.1024871	Article		0	Mobeen H, Safdar M, Fatima A, Afzal S, Zaman H, Mehdi Z.	PubMed
72	Nanomedicines for the Delivery of Antimicrobial Peptides (AMPs)	Microbial infections are still among the major public health concerns since several yeasts and fungi, and other pathogenic microorganisms, are responsible for continuous growth of infections and drug resistance against bacteria. Antimicrobial resistance rate is fostering the need to develop new strategies against drug-resistant superbugs. Antimicrobial peptides (AMPs) are small peptide-based mole…	2020	10.3390/nano10030560	Article	English	67	Teixeira MC, Carbone C, Sousa MC, Espina M, Garcia ML, Sanchez-Lopez E, Souto EB.	PubMed
73	Prospects of algae-based green synthesis of nanoparticles for environmental applications		2022	10.1016/j.chemosphere.2022.133571	Article	English	26	Khan F, Shahid A, Zhu H, Wang N, Javed MR, Ahmad N, Xu J, Alam MA, Mehmood MA.	PubMed
74	Detection Strategies of Zearalenone for Food Safety: A Review		2022	10.1080/10408347.2020.1797468	Article	English	18	Caglayan MO, Şahin S, Üstündağ Z.	PubMed
75	Metallic and polymeric green nanoplatforms in oncology	Abstract: Chemotherapy, the cornerstone of cancer treatment, although invaluable, is plagued with unbearable and occasionally life-threatening side effects due to its inability to discriminate between tumorous and healthy cells. Anticancer nanomedicines have gained prominence due to their site-specific delivery of chemotherapeutic agents. In comparison to traditional chemical and physical procedu…	2023	10.1093/jambio/lxac044	Article	English	0	Jadhav M, Prabhu A.	PubMed
76	Synthesis, Properties and Bioimaging Applications of Silver-Based Quantum Dots	Ag-based quantum dots (QDs) are semiconductor nanomaterials with exclusive electrooptical properties ideally adaptable for various biotechnological, chemical, and medical applications. Silver-based semiconductor nanocrystals have developed rapidly over the past decades. They have become a promising luminescent functional material for in vivo and in vitro fluorescent studies due to their ability t…	2021	10.3390/ijms222212202	Article	English	13	Borovaya M, Horiunova I, Plokhovska S, Pushkarova N, Blume Y, Yemets A.	PubMed
77	Insights into the structure and function of membrane-integrated processive glycosyltransferases		2015	10.1016/j.sbi.2015.07.008	Article	English	38	Bi Y, Hubbard C, Purushotham P, Zimmer J.	PubMed
78	Application of Nanomaterials for Coping with Mycotoxin Contamination in Food Safety: From Detection to Control		2022	10.1080/10408347.2022.2076063	Article	English	6	Lin X, Yu W, Tong X, Li C, Duan N, Wang Z, Wu S.	PubMed
79	Moulds on cementitious building materials-problems, prevention and future perspectives		2020	10.1007/s00253-019-10185-7	Article	English	10	Campana R, Sabatini L, Frangipani E.	PubMed
80	Targeting Malassezia species for Novel Synthetic and Natural Antidandruff Agents		2017	10.2174/0929867324666170404110631	Article	English	24	Angiolella L, Carradori S, Maccallini C, Giusiano G, Supuran CT.	PubMed
81	A Review on Current Designation of Metallic Nanocomposite Hydrogel in Biomedical Applications	In the past few decades, nanotechnology has been receiving significant attention globally and is being continuously developed in various innovations for diverse applications, such as tissue engineering, biotechnology, biomedicine, textile, and food technology. Nanotechnological materials reportedly lack cell-interactive properties and are easily degraded into unfavourable products due to the pres…	2022	10.3390/nano12101629	Article	English	5	Dzulkharnien NSF, Rohani R.	PubMed
82	Exploring bacterial lignin degradation		2014	10.1016/j.cbpa.2013.11.015	Article	English	299	Brown ME, Chang MC.	PubMed
83	Pharmaceutical and Biomedical Applications of Green Synthesized Metal and Metal Oxide Nanoparticles	Background:: Due to the rapid growth in life threatening diseases such as cancer, diabetes, chronic wound and HIV/AIDS along with rise of side effects of the current treatments, world is now focusing to utilize new treatment options. Currently, the development of green nanotechnology field seems as a potential alternate for diseases diagnosis and treatment by preparation of various sizes and shap…	2020	10.2174/1381612826666201126144805	Article	English	8	Zafar N, Madni A, Khalid A, Khan T, Kousar R, Naz SS, Wahid F.	PubMed
84	Fungi-derived agriculturally important nanoparticles and their application in crop stress management - Prospects and environmental risks		2022	10.1016/j.envres.2022.113543	Article	English	7	Sonawane H, Shelke D, Chambhare M, Dixit N, Math S, Sen S, Borah SN, Islam NF, Joshi SJ, Yousaf B, Rinklebe J, Sarma H.	PubMed
85	Carbon-Based Nanomaterials: Promising Antiviral Agents to Combat COVID-19 in the Microbial-Resistant Era		2021	10.1021/acsnano.1c00629	Article	English	109	Serrano-Aroca Á, Takayama K, Tuñón-Molina A, Seyran M, Hassan SS, Pal Choudhury P, Uversky VN, Lundstrom K, Adadi P, Palù G, Aljabali AAA, Chauhan G, Kandimalla R, Tambuwala MM, Lal A, Abd El-Aziz TM, Sherchan S, Barh D, Redwan EM, Bazan NG, Mishra YK, Uhal BD, Brufsky A.	PubMed
86	In Vivo Biosynthesis of Inorganic Nanomaterials Using Eukaryotes-A Review	Bionanotechnology, the use of biological resources to produce novel, valuable nanomaterials, has witnessed tremendous developments over the past two decades. This eco-friendly and sustainable approach enables the synthesis of numerous, diverse types of useful nanomaterials for many medical, commercial, and scientific applications. Countless reviews describing the biosynthesis of nanomaterials hav…	2020	10.3390/molecules25143246	Article	English	18	Rahman A, Lin J, Jaramillo FE, Bazylinski DA, Jeffryes C, Dahoumane SA.	PubMed
87	Green Synthesis of Metal Oxides Semiconductors for Gas Sensing Applications	During recent decades, metal oxide semiconductors (MOS) have sparked more attention in various applications and industries due to their excellent sensing characteristics, thermal stability, abundance, and ease of synthesis. They are reliable and accurate for measuring and monitoring environmentally important toxic gases, such as NO2, NO, N2O, H2S, CO, NH3, CH4, SO2, and CO2. Compared to other sen…	2022	10.3390/s22134669	Article	English	8	Dadkhah M, Tulliani JM.	PubMed
88	Nanoparticles as a Solution for Eliminating the Risk of Mycotoxins	Mycotoxins are toxic secondary metabolites produced by certain filamentous fungi. The occurrence of mycotoxins in food and feed causes negative health impacts on both humans and animals. Clay binders, yeast cell walls, or antioxidant additives are the most widely used products for mycotoxin elimination to reduce their impact. Although conventional methods are constantly improving, current researc…	2018	10.3390/nano8090727	Article	English	71	Horky P, Skalickova S, Baholet D, Skladanka J.	PubMed
89	Carbon nanostructures: a comprehensive review of potential applications and toxic effects		2022	10.1007/s13205-022-03175-6	Article	English	6	Farmand M, Jahanpeyma F, Gholaminejad A, Azimzadeh M, Malaei F, Shoaie N.	PubMed
90	Lignin nanoparticles enter the scene: A promising versatile green tool for multiple applications		2021	10.1016/j.biotechadv.2020.107685	Article	English	74	Schneider WDH, Dillon AJP, Camassola M.	PubMed
91	Biogenic metal nanoparticles with microbes and their applications in water treatment: a review		2022	10.1007/s11356-021-17042-z	Article	English	4	Du Z, Zhang Y, Xu A, Pan S, Zhang Y.	PubMed
92	Recent advances in the construction of biocomposites based on fungal mycelia	In recent years, environmental problems have become increasingly serious, significantly effecting the ecosystem and human health. To deal with the problem of environmental pollution in an eco-conscious way, sustainable composite biomaterials are being produced. Mycelium-based composite biomaterials combine biological systems with substrates such as nanomaterials or agricultural and industrial was…	2022	10.3389/fbioe.2022.1067869	Article		2	Li K, Jia J, Wu N, Xu Q.	PubMed
93	Preparation, characterization and properties of three different nanomaterials either alone or loaded with nystatin or fluconazole antifungals	Abstract: Engineered nanoparticles have enabled the development of novel uses, particularly in disease management. In this investigation, we synthesized and studied three distinct nanomaterials: solid lipid nanoparticles (SLNPs), chitosan nanoparticles (CSNPs), and carbon nanotubes (CNTs), either alone or loaded with two antifungals, nystatin, and fluconazole. The purpose of this study is to inve…	2022	10.1038/s41598-022-26523-1	Article	English	1	Helal SH, Abdel-Aziz HMM, El-Zayat MM, Hasaneen MNA.	PubMed
94	Endophytic Nanotechnology: An Approach to Study Scope and Potential Applications	Nanotechnology has become a very advanced and popular form of technology with huge potentials. Nanotechnology has been very well explored in the fields of electronics, automobiles, construction, medicine, and cosmetics, but the exploration of nanotecnology’s use in agriculture is still limited. Due to climate change, each year around 40% of crops face abiotic and biotic stress; with the global de…	2021	10.3389/fchem.2021.613343	Article		23	Meena M, Zehra A, Swapnil P, Harish, Marwal A, Yadav G, Sonigra P.	PubMed
95	Microbial Fabricated Nanosystems: Applications in Drug Delivery and Targeting	The emergence of nanosystems for different biomedical and drug delivery applications has drawn the attention of researchers worldwide. The likeness of microorganisms including bacteria, yeast, algae, fungi, and even viruses toward metals is well-known. Higher tolerance to toxic metals has opened up new avenues of designing microbial fabricated nanomaterials. Their synthesis, characterization and …	2021	10.3389/fchem.2021.617353	Article		7	Sachin K, Karn SK.	PubMed
96	Synergistic Activity of Rhamnolipid Biosurfactant and Nanoparticles Synthesized Using Fungal Origin Chitosan Against Phytopathogens	Phytopathogens pose severe implications in the quantity and quality of food production by instigating several diseases. Biocontrol strategies comprising the application of biomaterials have offered endless opportunities for sustainable agriculture. We explored multifarious potentials of rhamnolipid-BS (RH-BS: commercial), fungal chitosan (FCH), and FCH-derived nanoparticles (FCHNPs). The high-qua…	2022	10.3389/fbioe.2022.917105	Article		1	Karamchandani BM, Maurya PA, Dalvi SG, Waghmode S, Sharma D, Rahman PKSM, Ghormade V, Satpute SK.	PubMed
97	Nanoscale Interaction Mechanisms of Antiviral Activity		2023	10.1021/acsptsci.2c00195	Article	English	0	Bhatti A, DeLong RK.	PubMed
98	Trichoderma: An Eco-Friendly Source of Nanomaterials for Sustainable Agroecosystems	Traditional nanoparticle (NP) synthesis methods are expensive and generate hazardous products. It is essential to limit the risk of toxicity in the environment from the chemicals as high temperature and pressure is employed in chemical and physical procedures. One of the green strategies used for sustainable manufacturing is microbial nanoparticle synthesis, which connects microbiology with nanot…	2022	10.3390/jof8040367	Article	English	10	Alghuthaymi MA, Abd-Elsalam KA, AboDalam HM, Ahmed FK, Ravichandran M, Kalia A, Rai M.	PubMed
99	Comparison of physicochemical and rheology properties of Shiitake stipes-derived chitin nanocrystals and nanofibers		2020	10.1016/j.carbpol.2020.116468	Article	English	17	Zhang M, Li Y, Wang W, Yang Y, Shi X, Sun M, Hao Y, Li Y.	PubMed
100	Stability of biogenic metal(loid) nanomaterials related to the colloidal stabilization theory of chemical nanostructures		2018	10.1080/07388551.2018.1440525	Article	English	45	Piacenza E, Presentato A, Turner RJ.	PubMed
101	Development of antifungal therapies using nanomaterials	The number and diversity of chemical structures currently available as antibacterial drugs is much higher compared with the number of active substances in relation to pathogenic fungi. In this review we focus on nanotechnology approaches, which offer promising strategies to create nanoagents that possess broad-spectrum antifungal activity and might overcome mechanisms of antibiotic resistance. Sp…	2017	10.2217/nnm-2017-0052	Article	English	30	Niemirowicz K, Durnaś B, Piktel E, Bucki R.	PubMed
102	Recent Developments on Using Nanomaterials to Combat Candida albicans	Vaginal candidiasis (VC) is a common disease of women and the main pathogen is Candida albicans (C. albicans). C. albicans infection incidence especially its drug resistance have become a global health threat due to the existence of C. albicans biofilms and the low bioavailability of traditional antifungal drugs. In recent years, nanomaterials have made great progresses in the field of antifungal…	2021	10.3389/fchem.2021.813973	Article		8	Li B, Pan L, Zhang H, Xie L, Wang X, Shou J, Qi Y, Yan X.	PubMed
103	The natural plant compound carvacrol as an antimicrobial and anti-biofilm agent: mechanisms, synergies and bio-inspired anti-infective materials		2018	10.1080/08927014.2018.1480756	Article	English	58	Marchese A, Arciola CR, Coppo E, Barbieri R, Barreca D, Chebaibi S, Sobarzo-Sánchez E, Nabavi SF, Nabavi SM, Daglia M.	PubMed
104	Biocorona-induced modifications in engineered nanomaterial-cellular interactions impacting biomedical applications		2020	10.1002/wnan.1608	Article	English	7	Kobos L, Shannahan J.	PubMed
105	A Mini-Review on Lichen-Based Nanoparticles and Their Applications as Antimicrobial Agents	Biological entities such as green plants, fungi, and lichens are now a days persistently explored for the synthesis of nanoparticles. Lichen-based nanoparticles are also becoming increasingly popular owing to their biocompatibility, eco-friendliness, and cost-effectiveness. The lichen-based metal nanomaterials, particularly synthesized using green chemistry approaches, have turned out to be great…	2021	10.3389/fmicb.2021.633090	Article		10	Rattan R, Shukla S, Sharma B, Bhat M.	PubMed
106	Stable and Biocompatible Mushroom β-Glucan Modified Gold Nanorods for Cancer Photothermal Therapy		2017	10.1021/acs.jafc.7b03895	Article	English	27	Li X, Zhou J, Liu C, Xiong Q, Duan H, Cheung PCK.	PubMed
107	Antimicrobial and biocompatible properties of nanomaterials		2014	10.1166/jnn.2014.8761	Article	English	20	Ul-Islam M, Shehzad A, Khan S, Khattak WA, Ullah MW, Park JK.	PubMed
108	Antifungal Nano-Therapy in Veterinary Medicine: Current Status and Future Prospects	The global recognition for the potential of nanoproducts and processes in human biomedicine has given impetus for the development of novel strategies for rapid, reliable, and proficient diagnosis, prevention, and control of animal diseases. Nanomaterials exhibit significant antifungal and antimycotoxin activities against mycosis and mycotoxicosis disorders in animals, as evidenced through reports…	2021	10.3390/jof7070494	Article	English	9	Alghuthaymi MA, Hassan AA, Kalia A, Sayed El Ahl RMH, El Hamaky AAM, Oleksak P, Kuca K, Abd-Elsalam KA.	PubMed
109	Recent progress in bio-mediated synthesis and applications of engineered nanomaterials for sustainable agriculture	The ever-increasing demand for agricultural food products, medicine, and other commercial sectors requires new technologies for agricultural practices and promoting the optimum utilization of natural resources. The application of engineered nanomaterials (ENMs) enhance the biomass production and yield of food crop while resisting harmful environmental stresses. Bio-mediated synthesis of ENMs are …	2022	10.3389/fpls.2022.999505	Article		2	Bora KA, Hashmi S, Zulfiqar F, Abideen Z, Ali H, Siddiqui ZS, Siddique KHM.	PubMed
110	Engineering tailored nanoparticles with microbes: quo vadis?		2016	10.1002/wnan.1363	Article	English	348	Prasad R, Pandey R, Barman I.	PubMed
111	Carbon-Based Nanocomposite Smart Sensors for the Rapid Detection of Mycotoxins	Carbon-based nanomaterials have become the subject of intensive interest because their intriguing physical and chemical properties are different from those of their bulk counterparts, leading to novel applications in smart sensors. Mycotoxins are secondary metabolites with different structures and toxic effects produced by fungi. Mycotoxins have low molecular weights and highly diverse molecular …	2021	10.3390/nano11112851	Article	English	6	Ma X, Li X, Zhang W, Meng F, Wang X, Qin Y, Zhang M.	PubMed
112	Microbe-Mediated Biosynthesis of Nanoparticles: Applications and Future Prospects	Nanotechnology is the science of nano-sized particles/structures (~100 nm) having a high surface-to-volume ratio that can modulate the physical, chemical and biological properties of the chemical compositions. In last few decades, nanoscience has attracted the attention of the scientific community worldwide due to its potential uses in the pharmacy, medical diagnostics and disease treatment, ener…	2021	10.3390/biom11060886	Article	English	49	Koul B, Poonia AK, Yadav D, Jin JO.	PubMed
113	Microbial bioremediation strategies with wastewater treatment potentialities - A review		2022	10.1016/j.scitotenv.2021.151754	Article	English	20	Saeed MU, Hussain N, Sumrin A, Shahbaz A, Noor S, Bilal M, Aleya L, Iqbal HMN.	PubMed
114	Biosensors for plant pathogen detection		2017	10.1016/j.bios.2016.09.091	Article	English	161	Khater M, de la Escosura-Muñiz A, Merkoçi A.	PubMed
115	Carbon-based Nanomaterials: Carbon Nanotubes, Graphene, and Fullerenes for the Control of Burn Infections and Wound Healing	Abstract:: Burn injuries are extremely debilitating, resulting in high morbidity and mortality rates around the world. The risk of infection escalates in correlation with impairment of skin integrity, creating a barrier to healing and possibly leading to sepsis. With its numerous advantages over traditional treatment methods, nanomaterial-based wound healing has an immense capability of treating …	2022	10.2174/1389201023666220309152340	Article	English	8	Rahman MA, Abul Barkat H, Harwansh RK, Deshmukh R.	PubMed
116	Metallic nanoparticle synthesised by biological route: safer candidate for diverse applications		2018	10.1049/iet-nbt.2017.0076	Article	English	11	Ramrakhiani L, Ghosh S.	PubMed
117	Recent advances in aflatoxin B1 detection based on nanotechnology and nanomaterials-A review		2019	10.1016/j.aca.2019.04.032	Article	English	111	Xue Z, Zhang Y, Yu W, Zhang J, Wang J, Wan F, Kim Y, Liu Y, Kou X.	PubMed
118	Nanomaterial-Based Antifungal Therapies to Combat Fungal Diseases Aspergillosis, Coccidioidomycosis, Mucormycosis, and Candidiasis	Over the last years, invasive infections caused by filamentous fungi have constituted a serious threat to public health worldwide. Aspergillus, Coccidioides, Mucorales (the most common filamentous fungi), and Candida auris (non-filamentous fungus) can cause infections in humans. They are able to cause critical life-threatening illnesses in immunosuppressed individuals, patients with HIV/AIDS, unc…	2021	10.3390/pathogens10101303	Article	English	12	León-Buitimea A, Garza-Cervantes JA, Gallegos-Alvarado DY, Osorio-Concepción M, Morones-Ramírez JR.	PubMed
119	Structure and functions of Aggregation-Induced Emission-Photosensitizers in anticancer and antimicrobial theranostics	Photosensitizers with Aggregation-Induced Emission (AIE) can allow the efficient light-mediated generation of Reactive Oxygen Species (ROS) based on their complex molecular structure, while interacting with living cells. They achieve better tissue targeting and allow penetration of different wavelengths of Ultraviolet-Visible-Infrared irradiation. Not surprisingly, they are useful for fluorescenc…	2022	10.3389/fchem.2022.984268	Article		1	Abrahamse H, Hamblin MR, George S.	PubMed
120	Green Synthesis of Iron Nanoparticles and Their Environmental Applications and Implications		2016	10.3390/nano6110209	Article	English	309	Saif S, Tahir A, Chen Y.	PubMed
121	Toxicity of metal oxide nanoparticles: mechanisms, characterization, and avoiding experimental artefacts		2015	10.1002/smll.201303947	Article	English	283	Djurišić AB, Leung YH, Ng AM, Xu XY, Lee PK, Degger N, Wu RS.	PubMed
122	Research advances and applications of biosensing technology for the diagnosis of pathogens in sustainable agriculture		2021	10.1007/s11356-021-12419-6	Article	English	34	Ali Q, Ahmar S, Sohail MA, Kamran M, Ali M, Saleem MH, Rizwan M, Ahmed AM, Mora-Poblete F, do Amaral Júnior AT, Mubeen M, Ali S.	PubMed
123	Antimicrobial applications of water-dispersible magnetic nanoparticles in biomedicine		2014	10.2174/0929867321666140304101752	Article	English	26	Huang KS, Shieh DB, Yeh CS, Wu PC, Cheng FY.	PubMed
124	Disease resistance and growth promotion activities of chitin/cellulose nanofiber from spent mushroom substrate to plant		2022	10.1016/j.carbpol.2022.119233	Article	English	9	Li H, Yoshida S, Mitani N, Egusa M, Takagi M, Izawa H, Matsumoto T, Kaminaka H, Ifuku S.	PubMed
125	Biotransformation of Pristine and Oxidized Carbon Nanotubes by the White Rot Fungus Phanerochaete chrysosporium	Carbon nanomaterials are widely studied and applied nowadays, with annual production increasing. After entering the environment, the complete degradation of these carbon nanomaterials by microorganisms is proposed as an effective approach for detoxification and remediation. In this study, we evaluated the degradation of pristine multiwalled carbon nanotubes (p-MWCNTs) and oxidized multiwalled car…	2019	10.3390/nano9091340	Article	English	7	Ma Q, Yilihamu A, Ming Z, Yang S, Shi M, Ouyang B, Zhang Q, Guan X, Yang ST.	PubMed
126	Recent developments on titania nanoparticle as photocatalytic cancer cells treatment		2016	10.1016/j.jphotobiol.2016.08.046	Article	English	26	Jukapli NM, Bagheri S.	PubMed
127	Restricting mycotoxins without killing the producers: a new paradigm in nano-fungal interactions		2020	10.1007/s00253-020-10373-w	Article	English	9	Jesmin R, Chanda A.	PubMed
128	Green Synthesis of Transition-Metal Nanoparticles and Their Oxides: A Review	In recent years, many researchers have begun to shift their focus onto the synthesis of nanomaterials as this field possesses an immense potential that may provide incredible technological advances in the near future. The downside of conventional synthesis techniques, such as co-precipitation, sol-gel and hydrothermal methods, is that they necessitate toxic chemicals, produce harmful by-products …	2021	10.3390/ma14112700	Article	English	39	Drummer S, Madzimbamuto T, Chowdhury M.	PubMed
129	Chitosan/calcium nanoparticles as advanced antimicrobial coating for paper documents		2022	10.1016/j.ijbiomac.2022.06.142	Article	English	4	Egil AC, Ozdemir B, Gunduz SK, Altıkatoglu-Yapaoz M, Budama-Kilinc Y, Mostafavi E.	PubMed
130	The improved methods of heavy metals removal by biosorbents: A review		2020	10.1016/j.envpol.2019.113777	Article	English	171	Qin H, Hu T, Zhai Y, Lu N, Aliyeva J.	PubMed
131	Advancements in protein nanoparticle vaccine platforms to combat infectious disease		2021	10.1002/wnan.1681	Article	English	19	Butkovich N, Li E, Ramirez A, Burkhardt AM, Wang SW.	PubMed
132	Emerging nanotechnology for detection of mycotoxins in food and feed		2015	10.3109/09637486.2015.1034251	Article	English	47	Rai M, Jogee PS, Ingle AP.	PubMed
133	Eco-Friendly Hybrid PLLA/Chitosan/Trichoderma asperellum Nanomaterials as Biocontrol Dressings against Esca Disease in Grapevines	Fungi constitute the largest number of plant pathogens and are responsible for a range of serious plant diseases. Phaeomoniella chlamydospora (P. chlamydospora) and Phaeoacremonium aleophilum (P. aleophilum) are the main fungal pathogens causing esca disease in grapevines. On the other hand, there are beneficial microorganisms such as Trichoderma spp., which are able to control the growth of many…	2022	10.3390/polym14122356	Article	English	3	Spasova M, Manolova N, Rashkov I, Naydenov M.	PubMed
134	Solubilization of struvite and biorecovery of cerium by Aspergillus niger	Abstract: Cerium has many modern applications such as in renewable energies and the biosynthesis of nanomaterials. In this research, natural struvite was solubilized by Aspergillus niger and the biomass-free struvite leachate was investigated for its ability to recover cerium. It was shown that struvite was completed solubilized following 2 weeks of fungal growth, which released inorganic phospha…	2022	10.1007/s00253-021-11721-0	Article	English	2	Kang X, Csetenyi L, Gao X, Gadd GM.	PubMed
135	Progress on nanostructured electrochemical sensors and their recognition elements for detection of mycotoxins: A review		2018	10.1016/j.bios.2018.08.029	Article	English	140	Goud KY, Kailasa SK, Kumar V, Tsang YF, Lee SE, Gobi KV, Kim KH.	PubMed
136	Biofabricated yeast: super-soldier for detoxification of heavy metals		2023	10.1007/s11274-023-03596-2	Article	English	0	Bhavya G, De Britto S, Satapute P, Geetha N, Jogaiah S.	PubMed
137	Improved antifungal activity and stability of chitosan nanofibers using cellulose nanocrystal on banknote papers		2018	10.1016/j.carbpol.2018.02.041	Article	English	35	Mohammadi Amirabad L, Jonoobi M, Mousavi NS, Oksman K, Kaboorani A, Yousefi H.	PubMed
138	Advances in gold nanoparticles for mycotoxin analysis	<p>AuNPs have been widely used in mycotoxin detection including ELISA, optical-based sensors, electrochemical-based sensors, surface-enhanced Raman scattering-based sensors, mass-based sensors and other sensors.</p>	2021	10.1039/d0an02171g	Article	English	9	Wu L , Wang M , Wei D .	PubMed
139	Biogenic fabrication of nanomaterials from flower-based chemical compounds, characterization and their various applications: A review		2020	10.1016/j.sjbs.2020.05.012	Article	English	35	Kumar Bachheti R, Fikadu A, Bachheti A, Husen A.	PubMed
140	Relationship Between Structure And Antimicrobial Activity Of Zinc Oxide Nanoparticles: An Overview		2019	10.2147/ijn.s216204	Article	English	158	Lallo da Silva B, Abuçafy MP, Berbel Manaia E, Oshiro Junior JA, Chiari-Andréo BG, Pietro RCR, Chiavacci LA.	PubMed
141	Myconanotechnology in agriculture: a perspective		2013	10.1007/s11274-012-1171-6	Article	English	90	Kashyap PL, Kumar S, Srivastava AK, Sharma AK.	PubMed
142	Recent trends in analysis of mycotoxins in food using carbon-based nanomaterials		2022	10.38212/2224-6614.3437	Article	English	1	Chen BH, Inbaraj BS.	PubMed
143	Development of Nano-Antifungal Therapy for Systemic and Endemic Mycoses	Fungal mycoses have become an important health and environmental concern due to the numerous deleterious side effects on the well-being of plants and humans. Antifungal therapy is limited, expensive, and unspecific (causes toxic effects), thus, more efficient alternatives need to be developed. In this work, Copper (I) Iodide (CuI) nanomaterials (NMs) were synthesized and fully characterized, aimi…	2021	10.3390/jof7020158	Article	English	3	Martínez-Montelongo JH, Medina-Ramírez IE, Romo-Lozano Y, González-Gutiérrez A, Macías-Díaz JE.	PubMed
144	Fighting Phytopathogens with Engineered Inorganic-Based Nanoparticles	The development of effective and ecofriendly agrochemicals, including bactericides, fungicides, insecticides, and nematicides, to control pests and prevent plant diseases remains a key challenge. Nanotechnology has provided opportunities for the use of nanomaterials as components in the development of anti-phytopathogenic agents. Indeed, inorganic-based nanoparticles (INPs) are among the promisin…	2023	10.3390/ma16062388	Article	English	0	Kanakari E, Dendrinou-Samara C.	PubMed
145	Characterization of nanomaterials synthesized from Spirulina platensis extract and their potential antifungal activity	Nowadays, fungal infections increase, and the demand of novel antifungal agents is constantly rising. In the present study, silver, titanium dioxide, cobalt (II) hydroxide and cobalt (II,III) oxide nanomaterials have been synthesized from Spirulina platensis extract. The synthesis mechanism has been studied using GCMS and FTIR thus confirming the involvement of secondary metabolites, mainly amine…	2022	10.1371/journal.pone.0274753	Article	English	4	Sidorowicz A, Margarita V, Fais G, Pantaleo A, Manca A, Concas A, Rappelli P, Fiori PL, Cao G.	PubMed
146	Antimicrobial photodynamic inactivation in nanomedicine: small light strides against bad bugs	The relentless advance of drug-resistance among pathogenic microbes, mandates a search for alternative approaches that will not cause resistance. Photodynamic inactivation (PDI) involves the combination of nontoxic dyes with harmless visible light to produce reactive oxygen species that can selectively kill microbial cells. PDI can be broad-spectrum in nature and can also destroy microbial cells …	2015	10.2217/nnm.15.67	Article	English	137	Yin R, Agrawal T, Khan U, Gupta GK, Rai V, Huang YY, Hamblin MR.	PubMed
147	Emerging biomedical applications of nano-chitins and nano-chitosans obtained via advanced eco-friendly technologies from marine resources		2014	10.3390/md12115468	Article	English	118	Muzzarelli RA, El Mehtedi M, Mattioli-Belmonte M.	PubMed
148	Prevention of microbial biofilms - the contribution of micro and nanostructured materials		2014	10.2174/0929867321666140304101314	Article	English	9	Grumezescu AM, Chifiriuc CM.	PubMed
149	Emerging electrochemical sensing and biosensing approaches for detection of Fumonisins in food samples		2022	10.1080/10408398.2021.1932723	Article	English	4	Sohrabi H, Arbabzadeh O, Khaaki P, Majidi MR, Khataee A, Woo Joo S.	PubMed
150	A review on antimicrobial mechanism and applications of graphene-based materials		2023	10.1016/j.bioadv.2023.213440	Article	English	0	Shankar K, Agarwal S, Mishra S, Bhatnagar P, Siddiqui S, Abrar I.	PubMed
151	All That Glitters Is Not Silver-A New Look at Microbiological and Medical Applications of Silver Nanoparticles	Silver and its nanoparticles (AgNPs) have different faces, providing different applications. In recent years, the number of positive nanosilver applications has increased substantially. It has been proven that AgNPs inhibit the growth and survival of bacteria, including human and animal pathogens, as well as fungi, protozoa and arthropods. Silver nanoparticles are known from their antiviral and a…	2021	10.3390/ijms22020854	Article	English	21	Kowalczyk P, Szymczak M, Maciejewska M, Laskowski Ł, Laskowska M, Ostaszewski R, Skiba G, Franiak-Pietryga I.	PubMed
152	Cyanobacteria: miniature factories for green synthesis of metallic nanomaterials: a review		2022	10.1007/s10534-022-00405-5	Article	English	0	Pandey S, Rai LC, Dubey SK.	PubMed
153	Antioxidants: Classification, Natural Sources, Activity/Capacity Measurements, and Usefulness for the Synthesis of Nanoparticles	Natural extracts are the source of many antioxidant substances. They have proven useful not only as supplements preventing diseases caused by oxidative stress and food additives preventing oxidation but also as system components for the production of metallic nanoparticles by the so-called green synthesis. This is important given the drastically increased demand for nanomaterials in biomedical fi…	2021	10.3390/ma14154135	Article	English	59	Flieger J, Flieger W, Baj J, Maciejewski R.	PubMed
154	Anti-HSV Activity of Metallic Nanoparticles Functionalized with Sulfonates vs. Polyphenols	Metallic nanoparticles exhibit broad-spectrum activity against bacteria, fungi, and viruses. The antiviral activity of nanoparticles results from the multivalent interactions of nanoparticles with viral surface components, which result from the nanometer size of the material and the presence of functional compounds adsorbed on the nanomaterial surface. A critical step in the virus infection proce…	2022	10.3390/ijms232113104	Article	English	0	Tomaszewska E, Ranoszek-Soliwoda K, Bednarczyk K, Lech A, Janicka M, Chodkowski M, Psarski M, Celichowski G, Krzyzowska M, Grobelny J.	PubMed
155	Microbial synthesis of chalcogenide semiconductor nanoparticles: a review		2016	10.1111/1751-7915.12297	Article	English	60	Jacob JM, Lens PN, Balakrishnan RM.	PubMed
156	Suitability of starch/carvacrol nanofibers as biopreservatives for minimizing the fungal spoilage of bread		2021	10.1016/j.carbpol.2020.117166	Article	English	17	Fonseca LM, Souza EJD, Radünz M, Gandra EA, Zavareze EDR, Dias ARG.	PubMed
157	Phytochemically stabilized chitosan encapsulated Cu and Ag nanocomposites to remove cefuroxime axetil and pathogens from the environment		2022	10.1016/j.ijbiomac.2022.05.143	Article	English	7	Bhatia N, Kumari A, Thakur N, Sharma G, Singh RR, Sharma R.	PubMed
158	Bacterial Nanobionics via 3D Printing		2018	10.1021/acs.nanolett.8b02642	Article	English	33	Joshi S, Cook E, Mannoor MS.	PubMed
159	Allomelanin: A Biopolymer of Intrinsic Microporosity		2021	10.1021/jacs.1c00748	Article	English	30	McCallum NC, Son FA, Clemons TD, Weigand SJ, Gnanasekaran K, Battistella C, Barnes BE, Abeyratne-Perera H, Siwicka ZE, Forman CJ, Zhou X, Moore MH, Savin DA, Stupp SI, Wang Z, Vora GJ, Johnson BJ, Farha OK, Gianneschi NC.	PubMed
160	Biogenic Sulfur-Based Chalcogenide Nanocrystals: Methods of Fabrication, Mechanistic Aspects, and Bio-Applications	Bio-nanotechnology has emerged as an efficient and competitive methodology for the production of added-value nanomaterials (NMs). This review article gathers knowledge gleaned from the literature regarding the biosynthesis of sulfur-based chalcogenide nanoparticles (S-NPs), such as CdS, ZnS and PbS NPs, using various biological resources, namely bacteria, fungi including yeast, algae, plant extra…	2022	10.3390/molecules27020458	Article	English	4	Yanchatuña Aguayo OP, Mouheb L, Villota Revelo K, Vásquez-Ucho PA, Pawar PP, Rahman A, Jeffryes C, Terencio T, Dahoumane SA.	PubMed
161	Comprehensive Phytotoxicity Assessment Protocol for Engineered Nanomaterials		2021	10.1007/978-1-0716-1514-0_18	Book Chapter		0	Pokhrel LR, Ubah CS, Fallah S.	PubMed
162	Nanomaterials in food industry for the protection from mycotoxins: an update		2023	10.1007/s13205-023-03478-2	Article	English	0	Thirugnanasambandan T, Gopinath SCB.	PubMed
163	Toxicity of nanodiamonds to white rot fungi Phanerochaete chrysosporium through oxidative stress		2020	10.1016/j.colsurfb.2019.110658	Article	English	13	Ma Q, Zhang Q, Yang S, Yilihamu A, Shi M, Ouyang B, Guan X, Yang ST.	PubMed
164	Green approaches for the synthesis of metal and metal oxide nanoparticles using microbial and plant extracts	Green synthesis approaches are gaining significance as promising routes for the sustainable preparation of nanoparticles, offering reduced toxicity towards living organisms and the environment.	2022	10.1039/d1nr08144f	Article	English	56	Jeevanandam J, Kiew SF, Boakye-Ansah S, Lau SY, Barhoum A, Danquah MK, Rodrigues J.	PubMed
165	Fabrication and structural of the Ag(2)S-MgO/graphene oxide nanocomposites with high photocatalysis and antimicrobial activities		2020	10.1016/j.jphotobiol.2020.111882	Article	English	54	Wang H, Li G, Fakhri A.	PubMed
166	Mycorrhizas and nutrient cycling in ecosystems - a journey towards relevance?		2003	10.1046/j.1469-8137.2003.00704.x	Article	English	1104	Read DJ, Perez-Moreno J.	PubMed
167	Nanoscale zero-valent iron changes microbial co-occurrence pattern in pentachlorophenol-contaminated soil		2022	10.1016/j.jhazmat.2022.129482	Article	English	3	Su G, Wang Y, Ma B, Deng F, Lin D.	PubMed
168	Antibacterial Effect of Carbon Nanomaterials: Nanotubes, Carbon Nanofibers, Nanodiamonds, and Onion-like Carbon	The increasing resistance of bacteria and fungi to antibiotics is one of the health threats facing humanity. Of great importance is the development of new antibacterial agents or alternative approaches to reduce bacterial resistance to available antibacterial drugs. Due to the complexity of their properties, carbon nanomaterials (CNMs) may be of interest for a number of biomedical applications. O…	2023	10.3390/ma16030957	Article	English	0	Moskvitina E, Kuznetsov V, Moseenkov S, Serkova A, Zavorin A.	PubMed
169	Toxicity of silver nanoparticles in biological systems: Does the complexity of biological systems matter?		2017	10.1016/j.toxlet.2017.05.007	Article	English	160	Vazquez-Muñoz R, Borrego B, Juárez-Moreno K, García-García M, Mota Morales JD, Bogdanchikova N, Huerta-Saquero A.	PubMed
170	Quantum dot and superparamagnetic nanoparticle interaction with pathogenic fungi: internalization and toxicity profile		2014	10.1021/am501029g	Article	English	62	Rispail N, De Matteis L, Santos R, Miguel AS, Custardoy L, Testillano PS, Risueño MC, Pérez-de-Luque A, Maycock C, Fevereiro P, Oliva A, Fernández-Pacheco R, Ibarra MR, de la Fuente JM, Marquina C, Rubiales D, Prats E.	PubMed
171	Using inorganic nanoparticles to fight fungal infections in the antimicrobial resistant era		2023	10.1016/j.actbio.2023.01.019	Article	English	4	Huang T, Li X, Maier M, O'Brien-Simpson NM, Heath DE, O'Connor AJ.	PubMed
172	Mutagenesis and Resistance Development of Bacteria Challenged by Silver Nanoparticles	Because of their extremely broad spectrum and strong biocidal power, nanoparticles of metals, especially silver (AgNPs), have been widely applied as effective antimicrobial agents against bacteria, fungi, and so on. However, the mutagenic effects of AgNPs and resistance mechanisms of target cells remain controversial.	2022	10.1128/aac.00628-22	Article	English	2	Wu K, Li H, Cui X, Feng R, Chen W, Jiang Y, Tang C, Wang Y, Wang Y, Shen X, Liu Y, Lynch M, Long H.	PubMed
173	ZnO-based nanofungicides: Synthesis, characterization and their effect on the coffee fungi Mycena citricolor and Colletotrichum sp		2019	10.1016/j.msec.2019.01.031	Article	English	32	Arciniegas-Grijalba PA, Patiño-Portela MC, Mosquera-Sánchez LP, Guerra Sierra BE, Muñoz-Florez JE, Erazo-Castillo LA, Rodríguez-Páez JE.	PubMed
174	Mechanistic Understanding of Candida albicans Biofilm Formation and Approaches for Its Inhibition	In recent years, the demand for novel antifungal therapies has increased several- folds due to its potential to treat severe biofilm-associated infections. Biofilms are made by the sessile microorganisms attached to the abiotic or biotic surfaces, enclosed in a matrix of exopolymeric substances. This results in new phenotypic characteristics and intrinsic resistance from both host immune response…	2021	10.3389/fmicb.2021.638609	Article		40	Atriwal T, Azeem K, Husain FM, Hussain A, Khan MN, Alajmi MF, Abid M.	PubMed
175	An overview of nanomaterial-based novel disinfection technologies for harmful microorganisms: Mechanism, synthesis, devices and application		2022	10.1016/j.scitotenv.2022.155720	Article	English	12	Hu ZT, Chen Y, Fei YF, Loo SL, Chen G, Hu M, Song Y, Zhao J, Zhang Y, Wang J.	PubMed
176	Application and mechanisms of metal-based nanoparticles in the control of bacterial and fungal crop diseases		2023	10.1002/ps.7218	Article	English	6	Li Y, Zhang P, Li M, Shakoor N, Adeel M, Zhou P, Guo M, Jiang Y, Zhao W, Lou B, Rui Y.	PubMed
177	Biosynthesis of Copper Oxide Nanoparticles with Potential Biomedical Applications		2020	10.2147/ijn.s255398	Article	English	57	Rabiee N, Bagherzadeh M, Kiani M, Ghadiri AM, Etessamifar F, Jaberizadeh AH, Shakeri A.	PubMed
178	Dye Removal from Water and Wastewater Using Various Physical, Chemical, and Biological Processes	Abstract: Synthetic dyes or colorants are key chemicals for various industries producing textiles, food, cosmetics, pharmaceutics, printer inks, leather, and plastics. Nowadays, the textile industry is the major consumer of dyes. The mass of synthetic colorants used by this industry is estimated at the level of 1 ÷ 3 × 105 tons, in comparison with the total annual consumption of around 7 × 105 to…	2018	10.5740/jaoacint.18-0051	Article	English	145	Piaskowski K, Świderska-Dąbrowska R, Zarzycki PK.	PubMed
179	Wastewater treatment with nanomaterials for the future: A state-of-the-art review		2023	10.1016/j.envres.2022.114652	Article	English	18	Zahmatkesh S, Hajiaghaei-Keshteli M, Bokhari A, Sundaramurthy S, Panneerselvam B, Rezakhani Y.	PubMed
180	Toxicity of Pristine and Chemically Functionalized Fullerenes to White Rot Fungus Phanerochaete chrysosporium	Fullerenes are widely produced and applied carbon nanomaterials that require a thorough investigation into their environmental hazards and risks. In this study, we compared the toxicity of pristine fullerene (C60) and carboxylated fullerene (C60-COOH) to white rot fungus Phanerochaete chrysosporium. The influence of fullerene on the weight increase, fibrous structure, ultrastructure, enzyme activ…	2018	10.3390/nano8020120	Article	English	17	Ming Z, Feng S, Yilihamu A, Ma Q, Yang S, Yang ST.	PubMed
181	New Generation of Fluconazole: A Review on Existing Researches and Technologies		2017	10.2174/1567201813666160502125620	Article	English	13	Behtash A, Nafisi S, Maibach HI.	PubMed
182	Relationship between the Antifungal Activity of Chitosan-Capsaicin Nanoparticles and the Oxidative Stress Response on Aspergillus parasiticus	The fungus Aspergillus parasiticus is a contaminant in agricultural crops and its eradication involves the indiscriminate use of harmful synthetic pesticides. In the search for antifungal agents of natural origin, chitosan (Q) and capsaicin (C) are coupled in the form of nanoparticles (Np), which can possess a direct application under specific conditions. Due to their small size, Np can cross thr…	2022	10.3390/polym14142774	Article	English	2	Hernández-Téllez CN, Luque-Alcaraz AG, Núñez-Mexía SA, Cortez-Rocha MO, Lizardi-Mendoza J, Rosas-Burgos EC, Rosas-Durazo AJ, Parra-Vergara NV, Plascencia-Jatomea M.	PubMed
183	Nanotherapies for sepsis by regulating inflammatory signals and reactive oxygen and nitrogen species: New insight for treating COVID-19		2021	10.1016/j.redox.2021.102046	Article	English	36	Chen L, Huang Q, Zhao T, Sui L, Wang S, Xiao Z, Nan Y, Ai K.	PubMed
184	Characterization of Chitosan Nanofiber Sheets for Antifungal Application		2015	10.3390/ijms161125947	Article	English	18	Egusa M, Iwamoto R, Izawa H, Morimoto M, Saimoto H, Kaminaka H, Ifuku S.	PubMed
185	Antimicrobial and antifungal properties of NiCu-PANI/PVA quaternary nanocomposite synthesized by chemical oxidative polymerization of polyaniline		2022	10.1016/j.chemosphere.2021.132696	Article	English	8	Laourari I, Lakhdari N, Belgherbi O, Medjili C, Berkani M, Vasseghian Y, Golzadeh N, Lakhdari D.	PubMed
186	Effect of Deterpenated Origanum majorana L. Essential Oil on the Physicochemical and Biological Properties of Chitosan/β-Chitin Nanofibers Nanocomposite Films	Herein, the effect of three deterpenated fractions from Origanum majorana L. essential oil on the physicochemical, mechanical and biological properties of chitosan/β-chitin nanofibers-based nanocomposite films were investigated. In general, the incorporation of Origanum majorana L. original essential oil or its deterpenated fractions increases the opacity of the nanocomposite films and gives them…	2021	10.3390/polym13091507	Article	English	8	Fernández-Marín R, Mujtaba M, Cansaran-Duman D, Ben Salha G, Andrés Sánchez MÁ, Labidi J, Fernandes SCM.	PubMed
187	A comprehensive review on green nanomaterials using biological systems: Recent perception and their future applications		2018	10.1016/j.colsurfb.2018.05.045	Article	English	204	Saratale RG, Karuppusamy I, Saratale GD, Pugazhendhi A, Kumar G, Park Y, Ghodake GS, Bharagava RN, Banu JR, Shin HS.	PubMed
188	Synthesis and in vitro antifungal efficacy of Cu-chitosan nanoparticles against pathogenic fungi of tomato		2015	10.1016/j.ijbiomac.2015.01.027	Article	English	266	Saharan V, Sharma G, Yadav M, Choudhary MK, Sharma SS, Pal A, Raliya R, Biswas P.	PubMed
189	Luliconazole Topical Dermal Drug Delivery for Superficial Fungal Infections: Penetration Hurdles and Role of Functional Nanomaterials	Abstract:: Luliconazole is the first and only anti-fungal agent approved for the short-term treatment of superficial fungal infections. However, commercially available conventional topical dermal drug delivery cargo of luliconazole is associated with certain limitations like lower skin permeation and shorter skin retention of drug. Therefore, present review is an attempt to decode the penetration…	2022	10.2174/1381612828666220623095743	Article	English	2	Babu CK, Shubhra, Ghouse SM, Singh PK, Khatri DK, Nanduri S, Singh SB, Madan J.	PubMed
190	Polyphenols as Antioxidants for Extending Food Shelf-Life and in the Prevention of Health Diseases: Encapsulation and Interfacial Phenomena	Toxicity caused by the exposure to human-made chemicals and environmental conditions has become a major health concern because they may significantly increase the formation of reactive oxygen species (ROS), negatively affecting the endogenous antioxidant defense. Living systems have evolved complex antioxidant mechanisms to protect cells from oxidative conditions. Although oxidative stress contri…	2021	10.3390/biomedicines9121909	Article	English	12	Costa M, Sezgin-Bayindir Z, Losada-Barreiro S, Paiva-Martins F, Saso L, Bravo-Díaz C.	PubMed
191	Cyanobacteria - A Promising Platform in Green Nanotechnology: A Review on Nanoparticles Fabrication and Their Prospective Applications		2020	10.2147/ijn.s256134	Article	English	46	Hamida RS, Ali MA, Redhwan A, Bin-Meferij MM.	PubMed
192	Resistance to Nano-Based Antifungals Is Mediated by Biomolecule Coronas		2019	10.1021/acsami.8b12175	Article	English	8	Siemer S, Westmeier D, Vallet C, Becker S, Voskuhl J, Ding GB, Thines E, Stauber RH, Knauer SK.	PubMed
193	Electrospun cellulose acetate composites containing supported metal nanoparticles for antifungal membranes		2016	10.1016/j.scitotenv.2015.10.072	Article	English	29	Quirós J, Gonzalo S, Jalvo B, Boltes K, Perdigón-Melón JA, Rosal R.	PubMed
194	Microbased biorefinery for gold nanoparticle production: recent advancements, applications and future aspects		2022	10.1080/10826068.2022.2122065	Article	English	1	Sahoo A, Satapathy KB, Sahoo SK, Panigrahi GK.	PubMed
195	Homobifunctional imidoester-modified zinc nano-spindle attenuated hyphae growth of Aspergillus against hypersensitivity responses		2023	10.1016/j.isci.2022.105922	Article	English	0	Liu H, Zhang K, Jang YO, Qiao Z, Jin J, Thi Dao TN, Koo B, Park CO, Shin Y.	PubMed
196	Ecotoxicological effects of carbon nanomaterials on algae, fungi and plants		2011	10.1166/jnn.2011.3767	Article	English	29	Basiuk EV, Ochoa-Olmos OE, De la Mora-Estrada LF.	PubMed
197	Electrosprayed Shrimp and Mushroom Nanochitins on Cellulose Tissue for Skin Contact Application	Cosmetics has recently focused on biobased skin-compatible materials. Materials from natural sources can be used to produce more sustainable skin contact products with enhanced bioactivity. Surface functionalization using natural-based nano/microparticles is thus a subject of study, aimed at better understanding the skin compatibility of many biopolymers also deriving from biowaste. This research…	2021	10.3390/molecules26144374	Article	English	8	Azimi B, Ricci C, Fusco A, Zavagna L, Linari S, Donnarumma G, Hadrich A, Cinelli P, Coltelli MB, Danti S, Lazzeri A.	PubMed
198	Biological synthesis of metal nanoparticles by microbes		2010	10.1016/j.cis.2010.02.001	Article	English	1253	Narayanan KB, Sakthivel N.	PubMed
199	Critical steps in fungal cell wall synthesis: strategies for their inhibition		1993	10.1016/0163-7258(93)90015-6	Article	English	27	Gozalbo D, Elorza MV, Sanjuan R, Marcilla A, Valentín E, Sentandreu R.	PubMed
200	Preventing fungal growth on heritage paper with antifungal and cellulase inhibiting magnesium oxide nanoparticles	<p>Magnesium oxide nanoparticles (MgO NPs) as a colourless antifungal treatment with anti-cellulase activity to prevent biodeterioration of paper-based heritage objects.</p>	2019	10.1039/c9tb00992b	Article	English	18	Franco Castillo I, García Guillén E, M de la Fuente J, Silva F, Mitchell SG.	PubMed
201	Vibrational Spectroscopy and Morphological Studies on Protein-Capped Biosynthesized Silver Nanoparticles		2020	10.1021/acsomega.9b02867	Article	English	13	Agressott EVH, Blätte D, Cunha FA, Noronha VT, Ciesielski R, Hartschuh A, Paula AJ, Fechine PBA, Souza Filho AG, Paschoal AR.	PubMed
202	Impact of Synthesis Methods on Structural and Antifungal Properties of Metal Sulfide Nanoparticles	Nanotechnology has the ability to produce novel nano-sized materials with excellent physical and chemical properties to act against phytopathogenic diseases, essential for revolution of agriculture and food industry. The development of facile, reliable and eco-friendly processes for the synthesis of biologically active nanomaterials is an important aspect of nanotechnology. In the present paper, …	2021	10.1166/jnn.2021.19515	Article	English	2	Ahuja R, Sidhu A, Bala A.	PubMed
203	A new age for biomedical applications of Ribosome Inactivating Proteins (RIPs): from bioconjugate to nanoconstructs		2016	10.1186/s12929-016-0272-1	Article	English	45	Pizzo E, Di Maro A.	PubMed
204	Lichens-A Potential Source for Nanoparticles Fabrication: A Review on Nanoparticles Biosynthesis and Their Prospective Applications	Green synthesis of nanoparticles (NPs) is a safe, eco-friendly, and relatively inexpensive alternative to conventional routes of NPs production. These methods require natural resources such as cyanobacteria, algae, plants, fungi, lichens, and naturally extracted biomolecules such as pigments, vitamins, polysaccharides, proteins, and enzymes to reduce bulk materials (the target metal salts) into a…	2021	10.3390/jof7040291	Article	English	27	Hamida RS, Ali MA, Abdelmeguid NE, Al-Zaban MI, Baz L, Bin-Meferij MM.	PubMed
205	Implementation of graphitic carbon nitride nanomaterials and laser irradiation for increasing bioethanol production from potato processing wastes		2022	10.1007/s11356-021-18119-5	Article	English	4	Saeed S, Samer M, Mohamed MSM, Abdelsalam E, Mohamed YMA, Abdel-Hafez SH, Attia YA.	PubMed
206	An ultrasmall chitosan nanosphere encapsulating carbon dots and rhodamine B as a ratiometric probe for the determination of Hg(2)		2020	10.1007/s00604-020-04627-7	Article	English	7	Wang X, Sun X, Xu Z, Pan W, Yu G, Wang J.	PubMed
207	Progress in the Application of Nanoparticles and Graphene as Drug Carriers and on the Diagnosis of Brain Infections	The blood–brain barrier (BBB) is the protective sheath around the brain that protects the sensitive microenvironments of the brain. However, certain pathogens, viruses, and bacteria disrupt the endothelial barrier and cause infection and hence inflammation in meninges. Macromolecular therapeutics are unable to cross the tight junctions, thereby limiting their bioavailability in the brain. Recentl…	2021	10.3390/molecules26010186	Article	English	47	Barani M, Mukhtar M, Rahdar A, Sargazi G, Thysiadou A, Kyzas GZ.	PubMed
208	Recent advances in responses of arbuscular mycorrhizal fungi - Plant symbiosis to engineered nanoparticles		2022	10.1016/j.chemosphere.2021.131644	Article	English	13	Wang L, Yang D, Ma F, Wang G, You Y.	PubMed
209	Current state of a dual behaviour of antimicrobial peptides-Therapeutic agents and promising delivery vectors		2017	10.1111/cbdd.13031	Article	English	46	Piotrowska U, Sobczak M, Oledzka E.	PubMed
210	Development of Gum-Acacia-Stabilized Silver Nanoparticles Gel of Rutin against Candida albicans	Candida spp. is one of the most causative pathogens responsible for fungal infections. It is often a hospital-acquired form of sepsis with a very high number of deaths. Currently, the most effective anti-fungal agents are based on polyenes or echinocandins. However, long-term treatments or repeated use of these anti-fungals lead to therapy limitations. Current research is urgently needed to overc…	2022	10.3390/gels8080472	Article	English	5	Alqarni MH, Foudah AI, Alam A, Salkini MA, Muharram MM, Labrou NE, Kumar P.	PubMed
211	Green route for recycling of low-cost waste resources for the biosynthesis of nanoparticles (NPs) and nanomaterials (NMs)-A review		2022	10.1016/j.envres.2021.112202	Article	English	16	Brar KK, Magdouli S, Othmani A, Ghanei J, Narisetty V, Sindhu R, Binod P, Pugazhendhi A, Awasthi MK, Pandey A.	PubMed
212	Technological advances for improving fungal cellulase production from fruit wastes for bioenergy application: A review		2021	10.1016/j.envpol.2021.117370	Article	English	15	Srivastava N, Srivastava M, Alhazmi A, Kausar T, Haque S, Singh R, Ramteke PW, Mishra PK, Tuohy M, Leitgeb M, Gupta VK.	PubMed
213	Fungal Nanophase Particles Catalyze Iron Transformation for Oxidative Stress Removal and Iron Acquisition		2020	10.1016/j.cub.2020.05.058	Article	English	26	Yu GH, Chi ZL, Kappler A, Sun FS, Liu CQ, Teng HH, Gadd GM.	PubMed
214	Scaffolds in the microbial resistant era: Fabrication, materials, properties and tissue engineering applications		2022	10.1016/j.mtbio.2022.100412	Article	English	12	Serrano-Aroca Á, Cano-Vicent A, Sabater I Serra R, El-Tanani M, Aljabali A, Tambuwala MM, Mishra YK.	PubMed
215	Significant Enhancement of Antimicrobial Activity in Oxygen-Deficient Zinc Oxide Nanowires		2020	10.1021/acsabm.0c00065	Article	English	31	Elbourne A, Cheeseman S, Wainer P, Kim J, Medvedev AE, Boyce KJ, McConville CF, van Embden J, Crawford RJ, Chapman J, Truong VK, Della Gaspera E.	PubMed
216	Wood Surface Modification with Hybrid Materials Based on Multi-Walled Carbon Nanotubes	In this work, new treatments based on multi-walled carbon nanotubes (MWCNTs), MWCNTs decorated with zinc oxide (ZnO), MWCNTs decorated with hydroxyapatite (HAp) and MWCNTs decorated with silver (Ag) nanoparticles dispersed in PHBHV solution are proposed for improving sound oak wood properties. We hypothesize that the solutions containing decorated MWCNTs will be more efficient as wood consolidant…	2022	10.3390/nano12121990	Article	English	4	David ME, Ion RM, Grigorescu RM, Iancu L, Constantin M, Stirbescu RM, Gheboianu AI.	PubMed
217	Exploration of Microbial Factories for Synthesis of Nanoparticles - A Sustainable Approach for Bioremediation of Environmental Contaminants	The nanomaterials synthesis is an intensifying research field due to their wide applications. The high surface-to-volume ratio of nanoparticles and quick interaction capacity with different particles make them as an attractive tool in different areas. Conventional physical and chemical procedures for development of metal nanoparticles become outmoded due to extensive production method, energy exp…	2021	10.3389/fmicb.2021.658294	Article		32	Kapoor RT, Salvadori MR, Rafatullah M, Siddiqui MR, Khan MA, Alshareef SA.	PubMed
218	Two forms and two faces, multiple states and multiple uses: Properties and applications of the self-assembling fungal hydrophobins		2013	10.1002/bip.22259	Article	English	48	Ren Q, Kwan AH, Sunde M.	PubMed
219	Changing Face of Wood Science in Modern Era: Contribution of Nanotechnology		2018	10.2174/1872210511666170808111512	Article	English	23	Mishra PK, Giagli K, Tsalagkas D, Mishra H, Talegaonkar S, Gryc V, Wimmer R.	PubMed
220	Contribution of Nano-Zero-Valent Iron and Arbuscular Mycorrhizal Fungi to Phytoremediation of Heavy Metal-Contaminated Soil	Soil pollution with heavy metals has attracted increasing concern, which calls for the development of new remediation strategies. The combination of physical, chemical, and biological techniques can achieve more efficient remediation. However, few studies have focused on whether nanomaterials and beneficial microbes can be jointly used to facilitate phytoremediation. Therefore, we studied the rol…	2021	10.3390/nano11051264	Article	English	14	Cheng P, Zhang S, Wang Q, Feng X, Zhang S, Sun Y, Wang F.	PubMed
221	A Review on Plants and Microorganisms Mediated Synthesis of Silver Nanoparticles, Role of Plants Metabolites and Applications	Silver nanoparticles are one of the most extensively studied nanomaterials due to their high stability and low chemical reactivity in comparison to other metals. They are commonly synthesized using toxic chemical reducing agents which reduce metal ions into uncharged nanoparticles. However, in the last few decades, several efforts were made to develop green synthesis methods to avoid the use of h…	2022	10.3390/ijerph19020674	Article	English	46	Mustapha T, Misni N, Ithnin NR, Daskum AM, Unyah NZ.	PubMed
222	Influence of Different Nanomaterials on Growth and Mycotoxin Production of Penicillium verrucosum		2016	10.1371/journal.pone.0150855	Article	English	21	Kotzybik K, Gräf V, Kugler L, Stoll DA, Greiner R, Geisen R, Schmidt-Heydt M.	PubMed
223	Green approach for nanoparticle biosynthesis by fungi: current trends and applications		2012	10.3109/07388551.2010.550568	Article	English	264	Dhillon GS, Brar SK, Kaur S, Verma M.	PubMed
224	Effects of different graphene-based nanomaterials as elicitors on growth and ganoderic acid production by Ganoderma lucidum		2020	10.1002/btpr.3027	Article	English	3	Darzian Rostami A, Yazdian F, Mirjani R, Soleimani M.	PubMed
225	Application of common duckweed (Lemna minor) in phytoremediation of chemicals in the environment: State and future perspective		2019	10.1016/j.chemosphere.2019.02.025	Article	English	132	Ekperusi AO, Sikoki FD, Nwachukwu EO.	PubMed
226	Biosynthesis of metallic nanoparticles using plant derivatives and their new avenues in pharmacological applications - An updated report		2016	10.1016/j.jsps.2014.11.013	Article	English	576	Kuppusamy P, Yusoff MM, Maniam GP, Govindan N.	PubMed
227	Role of Protein in Fungal Biomineralization of Copper Carbonate Nanoparticles		2021	10.1016/j.cub.2020.10.044	Article	English	19	Liu F, Shah DS, Gadd GM.	PubMed
228	Promises and potential of in situ nano-phytoremediation strategy to mycorrhizo-remediate heavy metal contaminated soils using non-food bioenergy crops (Vetiver zizinoides & Cannabis sativa)		2020	10.1080/15226514.2020.1774504	Article	English	23	Khan AG.	PubMed
229	Cell response to the exposure to chitosan-TPP//alginate nanogels		2011	10.1021/bm201231x	Article	English	53	Schütz CA, Juillerat-Jeanneret L, Käuper P, Wandrey C.	PubMed
230	Magnetic nanoparticles: new players in antimicrobial peptide therapeutics		2013	10.2174/1389203711209070682	Article	English	13	López-Abarrategui C, Figueroa-Espí V, Reyes-Acosta O, Reguera E, Otero-Gonzalez AJ.	PubMed
231	Can nanotechnology deliver the promised benefits without negatively impacting soil microbial life?		2014	10.1002/jobm.201400298	Article	English	85	Dimkpa CO.	PubMed
232	Clean approach for chromium removal in aqueous environments and role of nanomaterials in bioremediation: Present research and future perspective		2021	10.1016/j.chemosphere.2021.131368	Article	English	24	Samuel MS, Selvarajan E, Chidambaram R, Patel H, Brindhadevi K.	PubMed
233	Broad-Spectrum Solvent-free Layered Black Phosphorus as a Rapid Action Antimicrobial		2021	10.1021/acsami.1c01739	Article	English	14	Shaw ZL, Kuriakose S, Cheeseman S, Mayes ELH, Murali A, Oo ZY, Ahmed T, Tran N, Boyce K, Chapman J, McConville CF, Crawford RJ, Taylor PD, Christofferson AJ, Truong VK, Spencer MJS, Elbourne A, Walia S.	PubMed
234	A rapid and simple preparation of amphotericin B-loaded bacterial magnetite nanoparticles	Three-dimensional representation of amphotericin B molecules bound to magnetosomes derived from Magnetovibrio blakemorei strain MV-1T. Drug molecules are electrostatically adsorbed onto nanoparticles coated with positively charged poly-<jats:sc>l</jats:sc>-lysine.	2021	10.1039/d1ra03950d	Article	English	1	Correa T, Bazylinski DA, Garcia F, Abreu F.	PubMed
235	Nanomaterial-based biosensors for food toxin detection		2014	10.1007/s12010-014-0993-0	Article	English	74	Malhotra BD, Srivastava S, Ali MA, Singh C.	PubMed
236	Copper Nanomaterial Morphology and Composition Control Foliar Transfer through the Cuticle and Mediate Resistance to Root Fungal Disease in Tomato (Solanum lycopersicum)		2020	10.1021/acs.jafc.0c04546	Article	English	26	Shen Y, Borgatta J, Ma C, Elmer W, Hamers RJ, White JC.	PubMed
237	Mechanisms of nanotoxicity - biomolecule coronas protect pathological fungi against nanoparticle-based eradication		2020	10.1080/17435390.2020.1808251	Article	English	6	Stauber RH, Westmeier D, Wandrey M, Becker S, Docter D, Ding GB, Thines E, Knauer SK, Siemer S.	PubMed
238	Mycology: Protein Control of Fungal Nanoparticle Formation		2021	10.1016/j.cub.2020.11.004	Article	English	0	Turnau K.	PubMed
239	Nanomaterials as Redox Mediators in Laccase-Based Amperometric Biosensors for Catechol Assay	Laccase is a copper-containing enzyme that does not require hydrogen peroxide as a co-substrate or additional cofactors for an enzymatic reaction. Nanomaterials of various chemical structures are usually applied to the construction of enzyme-based biosensors. Metals, metal oxides, semiconductors, and composite NPs perform various functions in electrochemical transformation schemes as a platform f…	2022	10.3390/bios12090741	Article	English	2	Demkiv O, Gayda G, Stasyuk N, Brahinetz O, Gonchar M, Nisnevitch M.	PubMed
240	Recent trends in layered double hydroxides based electrochemical and optical (bio)sensors for screening of emerging pharmaceutical compounds		2022	10.1016/j.envres.2022.113068	Article	English	11	Sohrabi H, Dezhakam E, Khataee A, Nozohouri E, Majidi MR, Mohseni N, Trofimov E, Yoon Y.	PubMed
241	Facile Homobifunctional Imidoester Modification of Advanced Nanomaterials for Enhanced Antibiotic Synergistic Effect		2021	10.1021/acsami.1c12352	Article	English	2	Liu H, Zou Q, Qiao Z, Jang YO, Koo B, Kim MG, Lee HJ, Kim SH, Shin Y.	PubMed
242	Molecular Dynamic Studies of the Complex Polyethylenimine and Glucose Oxidase		2016	10.3390/ijms17111796	Article	English	8	Szefler B, Diudea MV, Putz MV, Grudzinski IP.	PubMed
243	Can photocatalytic and magnetic nanoparticles be a threat to aquatic detrital food webs?		2021	10.1016/j.scitotenv.2020.144576	Article	English	8	Pradhan A, Fernandes M, Martins PM, Pascoal C, Lanceros-Méndez S, Cássio F.	PubMed
244	Trichoderma harzianum-Mediated ZnO Nanoparticles: A Green Tool for Controlling Soil-Borne Pathogens in Cotton	ZnO-based nanomaterials have high antifungal effects, such as inhibition of growth and reproduction of some pathogenic fungi, such as Fusarium sp., Rhizoctonia solani and Macrophomina phaseolina. Therefore, we report the extracellular synthesis of ZnONPs using a potential fungal antagonist (Trichoderma harzianum). ZnONPs were then characterized for their size, shape, charge and composition by vis…	2021	10.3390/jof7110952	Article	English	21	Zaki SA, Ouf SA, Albarakaty FM, Habeb MM, Aly AA, Abd-Elsalam KA.	PubMed
245	Synthesis of Functional Silver Nanoparticles and Microparticles with Modifiers and Evaluation of Their Antimicrobial, Anticancer, and Antioxidant Activity	An accumulating body of evidence reports the synthesis and biomedical applications of silver nanoparticles. However, the studies regarding the use of maleic acid and citric acid in the synthesis of nano-sized silver particles (AgNPs) and micro-sized silver particles (AgMPs) as well as their antibacterial, antifungal, and anticancer activities have not been reported. In the current study, we synth…	2020	10.3390/jfb11040076	Article	English	16	Dilshad E, Bibi M, Sheikh NA, Tamrin KF, Mansoor Q, Maqbool Q, Nawaz M.	PubMed
246	Ligninolytic activity of the Penicillium chrysogenum and Pleurotus ostreatus fungi involved in the biotransformation of synthetic multi-walled carbon nanotubes modify its toxicity	Multi-walled carbon nanotubes (MWCNTs) are of multidisciplinary scientific interest due to their exceptional physicochemical properties and a broad range of applications. However, they are considered potentially toxic nanoparticles when they accumulate in the environment. Given their ability to oxidize resistant polymers, mycorremediation with lignocellulolytic fungi are suggested as biological a…	2021	10.7717/peerj.11127	Article	English	0	Juárez-Cisneros G, Campos-García J, Díaz-Pérez SP, Lara-Romero J, Tiwari DK, Sánchez-Yáñez JM, Reyes-De la Cruz H, Jiménez-Sandoval S, Villegas J.	PubMed
247	Leachability and Anti-Mold Efficiency of Nanosilver on Poplar Wood Surface	Water-based antimicrobial agents, used in environmentally friendly applications, are widely used in wood protection industries. Furthermore, nanomaterials as antimicrobial agents, because of their biocidal component, huge specific surface area, and unique nanoscale effect, have attracted attention in the field of biodurability. We employed aqueous dispersed nano-silver with a diameter of 10 nm~20…	2022	10.3390/polym14050884	Article	English	4	Dai X, Qi Y, Luo H, He Z, Wei L, Dong X, Ma X, Yang DQ, Li Y.	PubMed
248	Toxicity of carbon nanotubes to white rot fungus Phanerochaete chrysosporium		2018	10.1016/j.ecoenv.2018.07.011	Article	English	15	Ming Z, Feng S, Yilihamu A, Yang S, Ma Q, Yang H, Bai Y, Yang ST.	PubMed
249	Dual-Function Polymer-Silver Nanocomposites for Rapid Killing of Microbes and Inhibiting Biofilms		2019	10.1021/acsbiomaterials.8b00239	Article	English	22	Hoque J, Yadav V, Prakash RG, Sanyal K, Haldar J.	PubMed
250	Biogenic nanoparticles: Synthesis, stability and biocompatibility mediated by proteins of Pseudomonas aeruginosa		2019	10.1016/j.colsurfb.2019.110517	Article	English	23	Quinteros MA, Bonilla JO, Alborés SV, Villegas LB, Páez PL.	PubMed
251	Applications of Functional Amyloids from Fungi: Surface Modification by Class I Hydrophobins		2017	10.3390/biom7030045	Article	English	27	Piscitelli A, Cicatiello P, Gravagnuolo AM, Sorrentino I, Pezzella C, Giardina P.	PubMed
252	Fullerenes as photosensitizers in photodynamic therapy: pros and cons		2018	10.1039/c8pp00195b	Article	English	98	Hamblin MR.	PubMed
253	Formulation and candidacidal activity of magnetic nanoparticles coated with cathelicidin LL-37 and ceragenin CSA-13	Abstract: Fungal infections caused by Candida spp. represent an emerging problem during treatment of immunocompromised patients and those hospitalized with serious principal diseases. The ever-growing number of fungal strains exhibiting drug resistance necessitates the development of novel antimicrobial therapies including those based on membrane-permeabilizing agents and nanomaterials as drug ca…	2017	10.1038/s41598-017-04653-1	Article	English	51	Niemirowicz K, Durnaś B, Tokajuk G, Piktel E, Michalak G, Gu X, Kułakowska A, Savage PB, Bucki R.	PubMed
254	Microwave-mediated synthesis of zinc oxide nanoparticles: a therapeutic approach against Malassezia species		2018	10.1049/iet-nbt.2018.0007	Article	English	4	Goswami SR, Singh M.	PubMed
255	Size- and shape-dependent clinical and mycological efficacy of silver nanoparticles on dandruff		2016	10.2147/ijn.s86828	Article	English	1	Anwar MF, Yadav D, Jain S, Kapoor S, Rastogi S, Arora I, Samim M.	PubMed
256	A morphological, enzymatic and metabolic approach to elucidate apoptotic-like cell death in fungi exposed to h- and α-molybdenum trioxide nanoparticles	<p>The present study compares for the first time the effects of h-MoO<sub>3</sub>and α-MoO<sub>3</sub>against two fungal strains:<italic>Aspergillus niger</italic>and<italic>Aspergillus flavus</italic>.</p>	2018	10.1039/c8nr06470a	Article	English	22	Chaves-Lopez C , Nguyen HN , Oliveira RC , Nadres ET , Paparella A , Rodrigues DF .	PubMed
257	Biosynthesis of Silver Nanoparticles Using Stenocereus queretaroensis Fruit Peel Extract: Study of Antimicrobial Activity	The synthesis and application of nanomaterials as antioxidants and cytotoxic agents has increased in recent years. Biological methods go beyond the chemical and physical synthesis that is expensive and not friendly to the environment. Foodborne pathogens and microorganisms causing candidiasis are responsible of 5–10% hospitalized patients. The nutritional properties of the fruit called pitaya, fr…	2021	10.3390/ma14164543	Article	English	5	Padilla-Camberos E, Sanchez-Hernandez IM, Torres-Gonzalez OR, Ramirez-Rodriguez P, Diaz E, Wille H, Flores-Fernandez JM.	PubMed
258	Deciphering the Fenton-reaction-aid lignocellulose degradation pattern by Phanerochaete chrysosporium with ferroferric oxide nanomaterials: Enzyme secretion, straw humification and structural alteration		2019	10.1016/j.biortech.2019.01.013	Article	English	33	Huang D, Li T, Xu P, Zeng G, Chen M, Lai C, Cheng M, Guo X, Chen S, Li Z.	PubMed
259	Functional Grading of Mycelium Materials with Inorganic Particles: The Effect of Nanoclay on the Biological, Chemical and Mechanical Properties	Biological materials that are created by growing mycelium-forming fungal microorganisms on natural fibers can form a solution to environmental pollution and scarcity of natural resources. Recent studies on the hybridization of mycelium materials with glass improved fire performance; however, the effect of inorganic particles on growth performance and mechanical properties was not previously inves…	2022	10.3390/biomimetics7020057	Article	English	3	Elsacker E, De Laet L, Peeters E.	PubMed
260	Interaction of TiO(2) nanoparticles with soil: Effect on microbiological and chemical traits		2022	10.1016/j.chemosphere.2022.134629	Article	English	8	Kaur H, Kalia A, Sandhu JS, Dheri GS, Kaur G, Pathania S.	PubMed
261	Effects of Dietary Supplementation with Green-Synthesized Zinc Oxide Nanoparticles for Candidiasis Control in Oreochromis niloticus		2022	10.1007/s12011-021-02985-8	Article	English	3	Diab AM, Shokr BT, Shukry M, Farrag FA, Mohamed RA.	PubMed
262	Microbial glycolipoprotein-capped silver nanoparticles as emerging antibacterial agents against cholera		2016	10.1186/s12934-016-0422-x	Article	English	86	Gahlawat G, Shikha S, Chaddha BS, Chaudhuri SR, Mayilraj S, Choudhury AR.	PubMed
263	Biosynthesis of silver nanoparticles using Penicillium verrucosum and analysis of their antifungal activity		2021	10.1016/j.sjbs.2021.01.063	Article	English	34	Yassin MA, Elgorban AM, El-Samawaty AEMA, Almunqedhi BMA.	PubMed
264	Mycogenic Nano-Complex for Plant Growth Promotion and Bio-Control of Pythium aphanidermatum	(1) Background: biological way is one of the most ecofriendly and safe strategies for nanomaterials synthesis. So, biosynthesis-green method was used for the preparation of Zn(II) complex (in the Nano scale) from the reaction of the schiff base ligand 2,2′-((1E,1′E)-(1,2-phenylenebis (azanylylidene)), bis(methanylylidene))bis(4-bromophenol), and Zn(II)sulphate. The biogenic ZnNP-T was characteriz…	2021	10.3390/plants10091858	Article	English	6	Moustafa SMN, Taha RH.	PubMed
265	Ecotoxicology of manufactured graphene oxide nanomaterials and derivation of preliminary guideline values for freshwater environments		2018	10.1002/etc.4074	Article	English	18	Markovic M, Kumar A, Andjelkovic I, Lath S, Kirby JK, Losic D, Batley GE, McLaughlin MJ.	PubMed
266	Recent advances in green synthesized nanoparticles for bactericidal and wound healing applications		2023	10.1016/j.heliyon.2023.e13128	Article	English	2	Nandhini SN, Sisubalan N, Vijayan A, Karthikeyan C, Gnanaraj M, Gideon DAM, Jebastin T, Varaprasad K, Sadiku R.	PubMed
267	Saprotrophy of Conidiobolus and Basidiobolus in leaf litter		2007	10.1016/j.mycres.2007.08.019	Article	English	19	Manning RJ, Waters SD, Callaghan AA.	PubMed
268	Eco-friendly Mycogenic Synthesis of ZnO and CuO Nanoparticles for In Vitro Antibacterial, Antibiofilm, and Antifungal Applications		2021	10.1007/s12011-020-02369-4	Article	English	88	Mohamed AA, Abu-Elghait M, Ahmed NE, Salem SS.	PubMed
269	Antimicrobial nanocapsules: from new solvent-free process to in vitro efficiency		2014	10.2147/ijn.s64746	Article	English	1	Steelandt J, Salmon D, Gilbert E, Almouazen E, Renaud FN, Roussel L, Haftek M, Pirot F.	PubMed
270	Ligustrum lucidum Leaf Extract-Assisted Green Synthesis of Silver Nanoparticles and Nano-Adsorbents Having Potential in Ultrasound-Assisted Adsorptive Removal of Methylene Blue Dye from Wastewater and Antimicrobial Activity	Present study was conducted to investigate the adsorption and ultrasound-assisted adsorption potential of silver nanoparticles (AgNPs) and silver nanoparticles loaded on chitosan (AgCS composite) as nano-adsorbents for methylene blue (MB) removal. AgNPs were synthesized using leaf extract of Ligustrum lucidum, which were incorporated on the chitosan’s surface for modification. UV–Vis Spectroscopy…	2022	10.3390/ma15051637	Article	English	6	Sultan M, Siddique M, Khan R, Fallatah AM, Fatima N, Shahzadi I, Waheed U, Bilal M, Ali A, Abbasi AM.	PubMed
271	Bio-fabricated bismuth-based materials for removal of emerging environmental contaminants from wastewater		2023	10.1016/j.envres.2023.115861	Article	English	0	Saddique Z, Imran M, Javaid A, Latif S, Kim TH, Janczarek M, Bilal M, Jesionowski T.	PubMed
272	Nano-Biohybrids: In Vivo Synthesis of Metal-Organic Frameworks inside Living Plants		2018	10.1002/smll.201702958	Article	English	48	Richardson JJ, Liang K.	PubMed
273	Synthesis, Characterization, and Antifungal Activity of Silver Nanoparticles Embedded in Pullulan Matrices	Steady developments made in nanotechnology-based products have facilitated new perspectives for combating drug-resistant fungi. Silver nanoparticles represent one of the most attractive nanomaterials in biomedicine due to their exclusive optical, electromagnetic, and catalytic properties and antifungal potency compared with other metal nanoparticles. Most studies show that the physicochemical par…	2021	10.3390/ma14227041	Article	English	6	Burduniuc O, Bostanaru AC, Mares M, Biliuta G, Coseri S.	PubMed
274	Effective management of soft rot of ginger caused by Pythium spp. and Fusarium spp.: emerging role of nanotechnology		2018	10.1007/s00253-018-9145-8	Article	English	35	Rai M, Ingle AP, Paralikar P, Anasane N, Gade R, Ingle P.	PubMed
275	Toxicity of graphene oxide to white rot fungus Phanerochaete chrysosporium		2016	10.1016/j.chemosphere.2016.02.097	Article	English	66	Xie J, Ming Z, Li H, Yang H, Yu B, Wu R, Liu X, Bai Y, Yang ST.	PubMed
276	Long-Term Effects of Copper Nanopesticides on Soil and Sediment Community Diversity in Two Outdoor Mesocosm Experiments		2020	10.1021/acs.est.0c00510	Article	English	27	Carley LN, Panchagavi R, Song X, Davenport S, Bergemann CM, McCumber AW, Gunsch CK, Simonin M.	PubMed
277	Plant and Microbial Responses to Repeated Cu(OH)(2) Nanopesticide Exposures Under Different Fertilization Levels in an Agro-Ecosystem		2018	10.3389/fmicb.2018.01769	Article		39	Simonin M, Colman BP, Tang W, Judy JD, Anderson SM, Bergemann CM, Rocca JD, Unrine JM, Cassar N, Bernhardt ES.	PubMed
278	Effect of nanoparticles on red clover and its symbiotic microorganisms		2016	10.1186/s12951-016-0188-7	Article	English	45	Moll J, Gogos A, Bucheli TD, Widmer F, van der Heijden MG.	PubMed
279	Green synthesis of silver nanoparticles by Conocarpus Lancifolius plant extract and their antimicrobial and anticancer activities		2022	10.1016/j.sjbs.2021.09.007	Article	English	50	Oves M, Ahmar Rauf M, Aslam M, Qari HA, Sonbol H, Ahmad I, Sarwar Zaman G, Saeed M.	PubMed
280	Effect of Fe₃O₄ Nanomaterial-Based MRI on the Efficacy of One-Sided Butterfly Sinus Lesions in the Nose	Fe3O4 materials have many crystal forms, and the morphology of their nanomaterials is more diverse. Under the influence of nano-effects, they exhibit unique physical and chemical properties. The synthesized Fe3O4 materials with different morphologies have different properties. They are widely used in related fields such as electromagnetics, chemical engineering, catalysis, sensors, acoustics, med…	2021	10.1166/jnn.2021.18694	Article	English	1	Wu S, Cheng Y, Chen Y, Ju Z, Xue X, Kong X.	PubMed
281	Pleiotropic Functions and Biological Potentials of Silver Nanoparticles Synthesized by an Endophytic Fungus		2020	10.3389/fbioe.2020.00095	Article		17	Chandankere R, Chelliah J, Subban K, Shanadrahalli VC, Parvez A, Zabed HM, Sharma YC, Qi X.	PubMed
282	Fluorophore-free luminescent double-shelled hollow mesoporous silica nanoparticles as pesticide delivery vehicles	<p>Carbon dots-embedded hollow double-shelled mesoporous silica nanoparticles serve as pesticide delivery vehicles.</p>	2018	10.1039/c8nr04626c	Article	English	61	Cao L , Zhang H , Zhou Z , Xu C , Shan Y , Lin Y , Huang Q .	PubMed
283	Nanobiotechnological approaches in anticoagulant therapy: The role of bioengineered silver and gold nanomaterials		2023	10.1016/j.talanta.2023.124279	Article	English	0	Barabadi H, Noqani H, Ashouri F, Prasad A, Jounaki K, Mobaraki K, Mohanta YK, Mostafavi E.	PubMed
284	Synergistic effect of a novel chitosan/silica nanocomposites-based formulation against gray mold of table grapes and its possible mode of action		2019	10.1016/j.ijbiomac.2019.08.249	Article	English	62	Youssef K, de Oliveira AG, Tischer CA, Hussain I, Roberto SR.	PubMed
285	Polyhydroxy fullerenes (fullerols or fullerenols): beneficial effects on growth and lifespan in diverse biological models		2011	10.1371/journal.pone.0019976	Article	English	89	Gao J, Wang Y, Folta KM, Krishna V, Bai W, Indeglia P, Georgieva A, Nakamura H, Koopman B, Moudgil B.	PubMed
286	Influence of the Alcohols on the ZnO Synthesis and Its Properties: The Photocatalytic and Antimicrobial Activities	Zinc oxide (ZnO) nanomaterials are used in various health-related applications, from antimicrobial textiles to wound dressing composites and from sunscreens to antimicrobial packaging. Purity, surface defects, size, and morphology of the nanoparticles are the main factors that influence the antimicrobial properties. In this study, we are comparing the properties of the ZnO nanoparticles obtained …	2022	10.3390/pharmaceutics14122842	Article	English	7	Motelica L, Vasile BS, Ficai A, Surdu AV, Ficai D, Oprea OC, Andronescu E, Jinga DC, Holban AM.	PubMed
287	Reduction and removal of Cr(VI) in water using biosynthesized palladium nanoparticles loaded Shewanella oneidensis MR-1		2022	10.1016/j.scitotenv.2021.150336	Article	English	17	Zhang Y, Zhao Q, Chen B.	PubMed
288	Toxicity and assimilation of cellulosic copper nanoparticles require α-arrestins in S. cerevisiae	Abstract: The increased use of antimicrobial compounds such as copper into nanoparticles changes how living cells interact with these novel materials. The increased use of antimicrobial nanomaterials combats infectious disease and food spoilage. Fungal infections are particularly difficult to treat because of the few druggable targets, and Saccharomyces cerevisiae provides an insightful model org…	2023	10.1093/mtomcs/mfad011	Article	English	0	Nurmalasari NPD, Winans MJ, Perroz K, Bovard VR, Anderson R, Smith S, Gallagher JEG.	PubMed
289	Green Synthesis of Nickel Oxide Nanoparticles from Berberis balochistanica Stem for Investigating Bioactivities	Green synthesis of nanomaterials is advancing due to its ease of synthesis, inexpensiveness, nontoxicity and renewability. In the present study, an eco-friendly biogenic method was developed for the green synthesis of nickel oxide nanoparticles (NiONPs) using phytochemically rich Berberis balochistanica stem (BBS) extract. The BBS extract was rich in phenolics, flavonoids and berberine. These phy…	2021	10.3390/molecules26061548	Article	English	37	Uddin S, Safdar LB, Anwar S, Iqbal J, Laila S, Abbasi BA, Saif MS, Ali M, Rehman A, Basit A, Wang Y, Quraishi UM.	PubMed
290	Fabrication of silver phosphate-ilmenite nanocomposites supported on glycol chitosan for visible light-driven degradation, and antimicrobial activities		2021	10.1016/j.ijbiomac.2020.12.049	Article	English	34	Ashraf MA, Li C, Zhang D, Zhao L, Fakhri A.	PubMed
291	Antifungal activity of montmorillonite/peptide aptamer nanocomposite against Colletotrichum gloeosporioides on Stylosanthes		2022	10.1016/j.ijbiomac.2022.07.034	Article	English	1	Xu Z, Jiang X, Li Y, Ma X, Tang Y, Li H, Yi K, Li J, Liu Z.	PubMed
292	Potential Applications and Antifungal Activities of Engineered Nanomaterials against Gray Mold Disease Agent Botrytis cinerea on Rose Petals		2017	10.3389/fpls.2017.01332	Article		89	Hao Y, Cao X, Ma C, Zhang Z, Zhao N, Ali A, Hou T, Xiang Z, Zhuang J, Wu S, Xing B, Zhang Z, Rui Y.	PubMed
293	In Vitro and In Vivo Photothermal Cancer Therapeutic Effects of Gold Nanorods Modified with Mushroom β-Glucan		2018	10.1021/acs.jafc.8b00292	Article	English	33	Li X, Zhou J, Dong X, Cheng WY, Duan H, Cheung PCK.	PubMed
294	Antimicrobial activity and physical characterization of silver nanoparticles green synthesized using nitrate reductase from Fusarium oxysporum		2014	10.1007/s12010-014-0809-2	Article	English	70	Gholami-Shabani M, Akbarzadeh A, Norouzian D, Amini A, Gholami-Shabani Z, Imani A, Chiani M, Riazi G, Shams-Ghahfarokhi M, Razzaghi-Abyaneh M.	PubMed
295	Self-assembly of two hydrophobins from marine fungi affected by interaction with surfaces		2017	10.1002/bit.26344	Article	English	14	Cicatiello P, Dardano P, Pirozzi M, Gravagnuolo AM, De Stefano L, Giardina P.	PubMed
296	Evaluation of bioactivities of zinc oxide, cadmium sulfide and cadmium sulfide loaded zinc oxide nanostructured materials prepared by nanosecond pulsed laser		2020	10.1016/j.msec.2020.111156	Article	English	13	Akhtar S, Rehman S, Asiri SM, Khan FA, Baig U, Hakeem AS, Gondal MA.	PubMed
297	An update on the biological effects of quantum dots: From environmental fate to risk assessment based on multiple biological models		2023	10.1016/j.scitotenv.2023.163166	Article	English	0	Wang X, Wu T.	PubMed
298	Calcofluor white-cholesteryl hydrogen succinate conjugate mediated liposomes for enhanced targeted delivery of voriconazole into Candida albicans	A nano antifungal-drug delivery system is designed to increase voriconazole efficacy by specifically binding to chitin in the fungal cell wall.	2022	10.1039/d2bm01263d	Article	English	1	Liu W, Li M, Tian B, Yang X, Du W, Wang X, Zhou H, Ding C, Sai S.	PubMed
299	[Research status of bioweathering control of stone buildings]		2021	10.13287/j.1001-9332.202108.039				Lin JY, Li BJ, Cheng C, Zhang YD, Gao M, Long MZ.	PubMed
300	TiO2 nanowire and TiO2 nanowire doped Ag-PVP nanocomposite for antimicrobial and self-cleaning cotton textile		2013	10.1016/j.carbpol.2012.08.068	Article	English	104	Hebeish AA, Abdelhady MM, Youssef AM.	PubMed
301	Characterization of Key Bio-Nano Interactions between Organosilica Nanoparticles and Candida albicans		2019	10.1021/acsami.9b10853	Article	English	10	Kesarwani V, Kelly HG, Shankar M, Robinson KJ, Kent SJ, Traven A, Corrie SR.	PubMed
302	Nanomaterial Fungicides: In Vitro and In Vivo Antimycotic Activity of Cobalt and Nickel Nanoferrites on Phytopathogenic Fungi		2017	10.1002/gch2.201700041	Article	English	41	Sharma P, Sharma A, Sharma M, Bhalla N, Estrela P, Jain A, Thakur P, Thakur A.	PubMed
303	Facile production of ZnS quantum dot nanoparticles by Saccharomyces cerevisiae MTCC 2918		2014	10.1016/j.jbiotec.2013.11.017	Article	English	69	Sandana Mala JG, Rose C.	PubMed
304	Growth of Ag-nanoparticles in an aqueous solution and their antimicrobial activities against Gram positive, Gram negative bacterial strains and Candida fungus		2016	10.1007/s00449-016-1539-3	Article	English	30	Aazam ES, Zaheer Z.	PubMed
305	Effect of interactions between various humic acid fractions and iron nanoparticles on the toxicity to white rot fungus		2020	10.1016/j.chemosphere.2020.125895	Article	English	7	Zhu Q, Li N, Wang C, Zhang Q, Sun H.	PubMed
306	Chemical and ultrastructural studies on the cell walls of the yeastlike and mycelial forms of Histoplasma farciminosum	The cell wall of the yeast form of Histoplasma farciminosum contains 13.2% β-1,3-glucan, 1.0% galactomannan, and 25.8% chitin, whereas the cell wall of mycelial form has 21.8, 4.5, and 40%, respectively, for the same polymers. Also, the cell wall of the yeast form contains α-1,3-glucan (13.5%) and an unidentified polymer (21.5%). Chitin, one of the structural polymers of both yeast and mycelial c…	1974	10.1128/jb.119.2.602-611.1974	Article	English	33	San-Blas G, Carbonell LM.	PubMed
307	Investigation of self-assembling proline- and glycine-rich recombinant proteins and peptides inspired by proteins from a symbiotic fungus using atomic force microscopy and circular dichroism spectroscopy		2012	10.1016/j.bbapap.2012.02.009	Article	English	12	Creasey RG, Voelcker NH, Schultz CJ.	PubMed
308	Strongly Coupled 2D Transition Metal Chalcogenide-MXene-Carbonaceous Nanoribbon Heterostructures with Ultrafast Ion Transport for Boosting Sodium/Potassium Ions Storage	Highlights : <jats:list list-type="bullet"> <jats:list-item> Unique “Janus” interfacial assemble strategy of 2D MXene nanosheets was proposed firstly. </jats:list-item> <jats:list-item> Ternary heterostructure consisting of high capacity transitional metal chalcogenide, high conductive 2D MXene and N rich fungal carbonaceous matrix was achieved for larger radius Na/K ions storages. </jats:list-it…	2021	10.1007/s40820-021-00623-5	Article	English	81	Cao J, Li J, Li D, Yuan Z, Zhang Y, Shulga V, Sun Z, Han W.	PubMed
309	Riboflavin-protected ultrasmall silver nanoclusters with enhanced antibacterial activity and the mechanisms	<p>Riboflavin acted as a surface coating to synthesize ultrasmall silver nanoclusters and RF@AgNCs possessed highly efficient antibacterial activity and good biocompatibility.</p>	2019	10.1039/c9ra02079a	Article	English	9	Li X, Fu T, Li B, Yan P, Wu Y.	PubMed
310	Biogenic pentagonal silver nanoparticles for safer and more effective antibacterial therapeutics		2018	10.2147/ijn.s168224	Article	English	9	Khan S, Ahmad K, Ahmad A, Raish M, Jan BL, Khan A, Khan MS.	PubMed
311	Toxicological assessment of commercial monolayer tungsten disulfide nanomaterials aqueous suspensions using human A549 cells and the model fungus Saccharomyces cerevisiae		2021	10.1016/j.chemosphere.2021.129603	Article	English	7	Domi B, Bhorkar K, Rumbo C, Sygellou L, Martin SM, Quesada R, Yannopoulos SN, Tamayo-Ramos JA.	PubMed
312	Solid-state NMR Reveals the Carbon-based Molecular Architecture of Cryptococcus neoformans Fungal Eumelanins in the Cell Wall		2015	10.1074/jbc.m114.618389	Article	English	54	Chatterjee S, Prados-Rosales R, Itin B, Casadevall A, Stark RE.	PubMed
313	Long-Term Effects of Multiwalled Carbon Nanotubes and Graphene on Microbial Communities in Dry Soil		2016	10.1021/acs.est.5b05620	Article	English	82	Ge Y, Priester JH, Mortimer M, Chang CH, Ji Z, Schimel JP, Holden PA.	PubMed
314	Non-Toxic and Ultra-Small Biosilver Nanoclusters Trigger Apoptotic Cell Death in Fluconazole-Resistant Candida albicans via Ras Signaling	Silver-based nanostructures are suitable for many biomedical applications, but to be useful therapeutic agents, the high toxicity of these nanomaterials must be eliminated. Here, we biosynthesize nontoxic and ultra-small silver nanoclusters (rsAg@NCs) using metabolites of usnioid lichen (a symbiotic association of algae and fungi) that exhibit excellent antimicrobial activity against fluconazole …	2019	10.3390/biom9020047	Article	English	10	Prateeksha; Singh BR, Gupta VK, Deeba F, Bajpai R, Pandey V, Naqvi AH, Upreti DK, Gathergood N, Jiang Y, El Enshasy HA, Sholkamy EN, Mostafa AA, Hesham AE, Singh BN.	PubMed
315	Biosynthesis of silver nanoparticles for the fabrication of non cytotoxic and antibacterial metallic polymer based nanocomposite system	Abstract: Nanomaterials have significantly contributed in the field of nanomedicine as this subject matter has combined the usefulness of natural macromolecules with organic and inorganic nanomaterials. In this respect, various types of nanocomposites are increasingly being explored in order to discover an effective approach in controlling high morbidity and mortality rate that had triggered by t…	2021	10.1038/s41598-021-90016-w	Article	English	33	Raza S, Ansari A, Siddiqui NN, Ibrahim F, Abro MI, Aman A.	PubMed
316	Formation of Amphipathic Amyloid Monolayers from Fungal Hydrophobin Proteins		2020	10.1007/978-1-4939-9869-2_4	Book Chapter		3	Ball SR, Pham CLL, Lo V, Morris VK, Kwan AH, Sunde M.	PubMed
317	Antimicrobial activity of ZnO-TiO(2) nanomaterials synthesized from three different precursors of ZnO: influence of ZnO/TiO(2) weight ratio	Abstract: In this study, ZnO-TiO2 nanoparticles were synthesized from three different precursors for ZnO (zinc acetate di-hydrate, zinc nitrate hexahydrate and zinc sulfate heptahydrate) and titanium (IV) isopropoxide for TiO2. The prepared nanomaterials were calcined at 500 °C for 3 h and characterized by various physicochemical techniques such as X-ray diffraction (XRD), Fourier transform infra…	2018	10.2166/wst.2017.647	Article	English	17	Daou I, Moukrad N, Zegaoui O, Rhazi Filali F.	PubMed
318	Nanomaterial Size and Surface Modification Mediate Disease Resistance Activation in Cucumber (Cucumis sativus)		2023	10.1021/acsnano.2c11790	Article	English	0	Luo X, Wang Z, Wang C, Yue L, Tao M, Elmer WH, White JC, Cao X, Xing B.	PubMed
319	Triplex Hybridization-Based Nanosystem for the Rapid Screening of Pneumocystis Pneumonia in Clinical Samples	Pneumocystis pneumonia (PcP) is a disease produced by the opportunistic infection of the fungus Pneumocystis jirovecii. As delayed or unsuitable treatments increase the risk of mortality, the development of rapid and accurate diagnostic tools for PcP are of great importance. Unfortunately, current standard methods present severe limitations and are far from adequate. In this work, a time-competit…	2020	10.3390/jof6040292	Article	English	4	Pla L, Aviñó A, Eritja R, Ruiz-Gaitán A, Pemán J, Friaza V, Calderón EJ, Aznar E, Martínez-Máñez R, Santiago-Felipe S.	PubMed
320	Engineered nanomaterials inhibit Podosphaera pannosa infection on rose leaves by regulating phytohormones		2019	10.1016/j.envres.2018.12.008	Article	English	61	Hao Y, Fang P, Ma C, White JC, Xiang Z, Wang H, Zhang Z, Rui Y, Xing B.	PubMed
321	Fungal Isolate Optimized for Biogenesis of Silver Nanoparticles with Enhanced Colloidal Stability		2016	10.1021/acs.langmuir.6b01813	Article	English	72	Rajput S, Werezuk R, Lange RM, McDermott MT.	PubMed
322	Influence of cellulose nanocrystals gellan gum-based coating on color and respiration rate of Agaricus bisporus mushrooms		2021	10.1111/1750-3841.15580	Article	English	14	Criado P, Fraschini C, Shankar S, Salmieri S, Lacroix M.	PubMed
323	White-rot basidiomycete-mediated decomposition of C60 fullerol		2009	10.1021/es801873q	Article	English	83	Schreiner KM, Filley TR, Blanchette RA, Bowen BB, Bolskar RD, Hockaday WC, Masiello CA, Raebiger JW.	PubMed
324	Antimicrobial activity of silver salt and silver nanoparticles in different forms against microorganisms of different taxonomic groups		2019	10.1016/j.jhazmat.2019.120754	Article	English	21	Gordienko MG, Palchikova VV, Kalenov SV, Belov AA, Lyasnikova VN, Poberezhniy DY, Chibisova AV, Sorokin VV, Skladnev DA.	PubMed
325	Application of antimicrobial active packaging film made of semolina flour, nano zinc oxide and nano-kaolin to maintain the quality of low-moisture mozzarella cheese during low-temperature storage		2019	10.1002/jsfa.9439	Article	English	43	Jafarzadeh S, Rhim JW, Alias AK, Ariffin F, Mahmud S.	PubMed
326	Enhanced Eradication of Bacterial/Fungi Biofilms by Glucose Oxidase-Modified Magnetic Nanoparticles as a Potential Treatment for Persistent Endodontic Infections		2021	10.1021/acsami.1c01748	Article	English	41	Ji Y, Han Z, Ding H, Xu X, Wang D, Zhu Y, An F, Tang S, Zhang H, Deng J, Zhou Q.	PubMed
327	Gold microwires based amperometric biosensor exploiting microbial architecture		2013	10.1016/j.bios.2013.06.003	Article	English	8	Sharma S, Srivastava S.	PubMed
328	Do silver/hydroxyapatite and zinc oxide nano-coatings improve inflammation around titanium orthodontic mini-screws? In vitro study		2023	10.1016/j.ortho.2022.100711	Article	English	0	Fathy Abo-Elmahasen MM, Abo Dena AS, Zhran M, Albohy SAH.	PubMed
329	Amperometric microsensor based on nanoporous gold for ascorbic acid detection in highly acidic biological extracts		2020	10.1016/j.aca.2019.10.022	Article	English	24	Kumar A, Furtado VL, Gonçalves JM, Bannitz-Fernandes R, Netto LES, Araki K, Bertotti M.	PubMed
330	Carbon nanotube-based nanocarriers: the importance of keeping it clean		2010	10.1166/jnn.2010.3083	Article	English	28	Delogu LG, Stanford SM, Santelli E, Magrini A, Bergamaschi A, Motamedchaboki K, Rosato N, Mustelin T, Bottini N, Bottini M.	PubMed
331	Complete green synthesis of silver-nanoparticles applying seed-borne Penicillium duclauxii		2020	10.1016/j.sjbs.2019.12.022	Article	English	34	Almaary KS, Sayed SRM, Abd-Elkader OH, Dawoud TM, El Orabi NF, Elgorban AM.	PubMed
332	Antimicrobial hyperbranched poly(ester amide)/polyaniline nanofiber modified montmorillonite nanocomposites		2014	10.1016/j.msec.2013.10.021	Article	English	27	Pramanik S, Bharali P, Konwar BK, Karak N.	PubMed
333	Synthesis, Photocatalytic, and Antifungal Properties of MgO, ZnO and Zn/Mg Oxide Nanoparticles for the Protection of Calcareous Stone Heritage		2017	10.1021/acsami.7b06130	Article	English	103	Sierra-Fernandez A, De la Rosa-García SC, Gomez-Villalba LS, Gómez-Cornelio S, Rabanal ME, Fort R, Quintana P.	PubMed
334	A comparison between the function of Serendipita indica and Sinorhizobium meliloti in modulating the toxicity of zinc oxide nanoparticles in alfalfa (Medicago sativa L.)		2022	10.1007/s11356-021-16287-y	Article	English	6	Tabande L, Sepehri M, Yasrebi J, Zarei M, Ghasemi-Fasaei R, Khatabi B.	PubMed
335	Antimicrobial Potential of Biosynthesized Silver Nanoparticles by Aaronsohnia factorovskyi Extract	The green biosynthesis of nanoparticles by plant extracts is an attractive and promising technique for medicinal applications. In the current study, we chose one of the daisy plants, Aaronsohnia factorovskyi (which grows in the Najd region, Saudi Arabia), to investigate its anti-microbial efficacy, in combination with silver nanoparticles. The biosynthesized nanoparticles were evaluated for antib…	2020	10.3390/molecules26010130	Article	English	24	Al-Otibi F, Al-Ahaidib RA, Alharbi RI, Al-Otaibi RM, Albasher G.	PubMed
336	Positive effects of Funneliformis mosseae inoculation on reed seedlings under water and TiO(2) nanoparticles stresses		2019	10.1007/s11274-019-2656-3	Article	English	21	Xu Z, Wu Y, Xiao Z, Ban Y, Belvett N.	PubMed
337	Ecofriendly preparation of silver nanoparticles-based nanocomposite stabilized by polysaccharides with antibacterial, antifungal and antiviral activities		2021	10.1007/s10534-021-00344-7	Article	English	41	Hasanin M, Elbahnasawy MA, Shehabeldine AM, Hashem AH.	PubMed
338	Magnetic Pycnoporus sanguineus-loaded alginate composite beads for removing dye from aqueous solutions		2014	10.3390/molecules19068276	Article	English	9	Yang CH, Shih MC, Chiu HC, Huang KS.	PubMed
339	Innovative Approach for Controlling Black Rot of Persimmon Fruits by Means of Nanobiotechnology from Nanochitosan and Rosmarinic Acid-Mediated Selenium Nanoparticles	The protection of persimmon fruits (Diospyros kaki L.) from postharvest fungal infestation with Alternaria alternata (A. alternate; black rot) is a major agricultural and economic demand worldwide. Edible coatings (ECs) based on biopolymers and phytocompounds were proposed to maintain fruit quality, especially with nanomaterials’ applications. Chitosan nanoparticles (NCt), rosmarinic acid bio-med…	2022	10.3390/polym14102116	Article	English	3	Salem MF, Tayel AA, Alzuaibr FM, Bakr RA.	PubMed
340	Extra and intracellular synthesis of nickel oxide nanoparticles mediated by dead fungal biomass		2015	10.1371/journal.pone.0129799	Article	English	53	Salvadori MR, Ando RA, Nascimento CA, Corrêa B.	PubMed
341	Extracellular biosynthesis of magnetite using fungi		2006	10.1002/smll.200500180	Article	English	335	Bharde A, Rautaray D, Bansal V, Ahmad A, Sarkar I, Yusuf SM, Sanyal M, Sastry M.	PubMed
342	Biosynthesis and safety evaluation of ZnO nanoparticles		2014	10.1007/s00449-013-0982-7	Article	English	66	Sarkar J, Ghosh M, Mukherjee A, Chattopadhyay D, Acharya K.	PubMed
343	Environmental impact of biogenic silver nanoparticles in soil and aquatic organisms		2020	10.1016/j.chemosphere.2019.124698	Article	English	53	Ottoni CA, Lima Neto MC, Léo P, Ortolan BD, Barbieri E, De Souza AO.	PubMed
344	Application of Response Surface Methodology for Optimizing the Therapeutic Activity of ZnO Nanoparticles Biosynthesized from Aspergillus niger	In this study, the biosynthesis of zinc oxide nanoparticles using Aspergillus niger (A/ZnO-NPs) is described. These particles have been characterized by UV–Vis spectrum analysis, X-ray powder diffraction, field emission scanning electron microscopy, and transmission electron microscopy. To use this biosynthesized nanoparticle as an antiproliferative and antimicrobial agent, the IC50 value against…	2021	10.3390/biomimetics6020034	Article	English	32	Es-Haghi A, Taghavizadeh Yazdi ME, Sharifalhoseini M, Baghani M, Yousefi E, Rahdar A, Baino F.	PubMed
345	ROS-independent toxicity of Fe(3)O(4) nanoparticles to yeast cells: Involvement of mitochondrial dysfunction		2018	10.1016/j.cbi.2018.03.012	Article	English	28	Peng Q, Huo D, Li H, Zhang B, Li Y, Liang A, Wang H, Yu Q, Li M.	PubMed
346	Green Synthesis, Characterization and Antimicrobial Activity of Copper Oxide Nanomaterial Derived from Momordica charantia		2020	10.2147/ijn.s240232	Article	English	52	Qamar H, Rehman S, Chauhan DK, Tiwari AK, Upmanyu V.	PubMed
347	Antifungal and antibacterial activity of densely dispersed silver nanospheres with homogeneity size which synthesized using chicory: An in vitro study		2018	10.1016/j.mycmed.2018.07.007	Article	English	19	Khatami M, Zafarnia N, Heydarpoor Bami M, Sharifi I, Singh H.	PubMed
348	Focused Microbiome Shifts in Reconstructed Wetlands Correlated with Elevated Copper Concentrations Originating from Micronized Copper Azole-Treated Wood		2021	10.1002/etc.5219	Article	English	0	Reichman JR, Johnson MG, Rygiewicz PT, Smith BM, Bollman MA, Storm MJ, King GA, Andersen CP.	PubMed
349	Effects of silver sulfide nanomaterials on mycorrhizal colonization of tomato plants and soil microbial communities in biosolid-amended soil		2015	10.1016/j.envpol.2015.07.002	Article	English	77	Judy JD, Kirby JK, Creamer C, McLaughlin MJ, Fiebiger C, Wright C, Cavagnaro TR, Bertsch PM.	PubMed
350	Fungus-mediated green synthesis of silver nanoparticles using Aspergillus terreus		2012	10.3390/ijms13010466	Article	English	306	Li G, He D, Qian Y, Guan B, Gao S, Cui Y, Yokoyama K, Wang L.	PubMed
351	Commonalities and Differences in the Transcriptional Response of the Model Fungus Saccharomyces cerevisiae to Different Commercial Graphene Oxide Materials		2020	10.3389/fmicb.2020.01943	Article		3	Laguna-Teno F, Suarez-Diez M, Tamayo-Ramos JA.	PubMed
352	Synthesis of Silver Nanoparticles using Euphorbia wallichii Extract and Assessment of their Bio-functionalities	Background:: Silver nanoparticles synthesized by the bio-green method have been applied to various biomedical applications. These procedures are simple, eco-friendly and serve as an alternative to complex chemical methods for the preparation of nanomaterials. Objective:: : In the present study, phytosynthesis of silver nanoparticles, to examine their antioxidant potential, toxic effects towards b…	2020	10.2174/1573406415666191111143213	Article	English	9	Phull AR, Ali A, Ali A, Abbasi S, Zia M, Khaskheli MH, Haq IU, Kamal MA.	PubMed
353	A versatile nanozyme integrated colorimetric and photothermal lateral flow immunoassay for highly sensitive and reliable Aspergillus flavus detection		2022	10.1016/j.bios.2022.114435	Article	English	10	Liang M, Cai X, Gao Y, Yan H, Fu J, Tang X, Zhang Q, Li P.	PubMed
354	Phytofabricated zinc oxide nanoparticles as a nanofungicide for management of Alternaria blight of Brassica		2021	10.1007/s10534-021-00342-9	Article	English	7	Dhiman S, Singh S, Varma A, Goel A.	PubMed
355	Mammalian cells: a unique scaffold for in situ biosynthesis of metallic nanomaterials and biomedical applications	<p>Nanoscale materials biosynthesis by using mammalian scaffold is green and highly biocompatible.</p>	2018	10.1039/c8tb01955j	Article	English	18	Rehman FU , Jiang H , Selke M , Wang X .	PubMed
356	Novel fluorescent nitrogen-doped carbon dots derived from Panax notoginseng for bioimaging and high selectivity detection of Cr(6)	<p>Schematic of the synthetic route to fluorescent Pn-CDs and Pn N-CDs and their applications in the bioimaging and detection of Cr<sup>6+</sup>.</p>	2021	10.1039/d0an01599g	Article	English	14	Zheng X , Qin K , He L , Ding Y , Luo Q , Zhang C , Cui X , Tan Y , Li L , Wei Y .	PubMed
357	Combination of Paraconiothyrium brasiliense fabricated titanium dioxide nanoparticle and antibiotics enhanced antibacterial and antibiofilm properties: A toxicity evaluation		2022	10.1016/j.envres.2022.113237	Article	English	5	Sathiyaseelan A, Saravanakumar K, Naveen KV, Han KS, Zhang X, Jeong MS, Wang MH.	PubMed
358	Carbon dots derived from kanamycin sulfate with antibacterial activity and selectivity for Cr(6+) detection	<p>Schematic of the synthetic route for fluorescent CDs-Kan and the applications in the Antibacterial, bioimaging and detection of Cr<sup>6+.</sup></p>	2021	10.1039/d0an02352c	Article	English	15	Luo Q , Qin K , Liu F , Zheng X , Ding Y , Zhang C , Xu M , Liu X , Wei Y .	PubMed
359	Ultrasmall and photostable nanotheranostic agents based on carbon quantum dots passivated with polyamine-containing organosilane molecules	<p>Facile synthesis of multifunctional CDs for cell imaging and imaging-guided anticancer drug delivery.</p>	2017	10.1039/c7nr05613c	Article	English	60	Yang J, Gao G, Zhang X, Ma YH, Jia HR, Jiang YW, Wang Z, Wu FG.	PubMed
360	Fungal Hydrophobin Proteins Produce Self-Assembling Protein Films with Diverse Structure and Chemical Stability		2014	10.3390/nano4030827	Article	English	43	Lo VC, Ren Q, Pham CL, Morris VK, Kwan AH, Sunde M.	PubMed
361	Biosynthesis of silver nanoparticles by the endophytic fungus Epicoccum nigrum and their activity against pathogenic fungi		2013	10.1007/s00449-013-0937-z	Article	English	128	Qian Y, Yu H, He D, Yang H, Wang W, Wan X, Wang L.	PubMed
362	Silver Nanoparticles on Nanoscale Silica Platelets (AgNP/NSP) and Nanoscale Silica Platelets (NSP) Inhibit the Development of Fusarium oxysporum f. sp. niveum		2019	10.1021/acsabm.9b00699	Article	English	4	Chang TH, Liu YW, Lin YH, Lin JJ, Huang JW, Hussain A, Chang PL.	PubMed
363	Assessment of the Impact of Different Treatments on the Technological and Antifungal Properties of Papyrus (Cyperus Papyrus L.) Sheets	In the present work, sheets of Papyrus (Cyperus papyrus L.), manufactured by lamination from strips pre-treated with different treatments, were evaluated for their technological and fungal infestation properties (Aspergillus flavus AFl375, A. niger Ani245 and Colletotrichum gloeosporioides Cgl311). The results showed that the highest values of tensile strength, tear strength, burst index and doub…	2019	10.3390/ma12040620	Article	English	12	Taha AS, Salem MZM, Abo Elgat WAA, Ali HM, Hatamleh AA, Abdel-Salam EM.	PubMed
364	Protein corona on biogenic silver nanoparticles provides higher stability and protects cells from toxicity in comparison to chemical nanoparticles		2021	10.1016/j.jenvman.2021.113434	Article	English	17	Spagnoletti FN, Kronberg F, Spedalieri C, Munarriz E, Giacometti R.	PubMed
365	Differential effects of graphene oxide nanosheets on Candida albicans phagocytosis by murine peritoneal macrophages		2018	10.1016/j.jcis.2017.10.104	Article	English	15	Diez-Orejas R, Feito MJ, Cicuéndez M, Rojo JM, Portolés MT.	PubMed
366	[Biosynthesis of spherical selenium nanoparticles with halophilic Bacillus subtilis subspecies stercoris strain XP for inhibition of strawberry pathogens]		2021	10.13345/j.cjb.200581				Zhu Y, Kong X, Wu E, Zhu N, Liang D, Lou M, Zhou Z, Jin H.	PubMed
367	Synthesis, Characterization and Biological Activities of Zinc Oxide Nanoparticles Derived from Secondary Metabolites of Lentinula edodes	Zinc oxide nanoparticles (ZnO NPs) are the second most prevalent metal oxide, owing to their characteristics of low cost, safe, and easily prepared. ZnO NPs have been found to exhibit unique properties which show their potential to be used in various therapies. Numerous techniques have been devised for the manufacture of zinc oxide because it is one of the nanomaterials that has received major re…	2023	10.3390/molecules28083532	Article	English	0	Amin ZS, Afzal M, Ahmad J, Ahmed N, Zeshan B, Hashim NHHN, Yean CY.	PubMed
368	Degradation and Microbial Uptake of C(60) Fullerols in Contrasting Agricultural Soils		2017	10.1021/acs.est.6b04637	Article	English	19	Berry TD, Filley TR, Clavijo AP, Bischoff Gray M, Turco R.	PubMed
369	Antimicrobial alumina nanobiostructures of disulfide- and triazole-linked peptides: Synthesis, characterization, membrane interactions and biological activity		2019	10.1016/j.colsurfb.2019.01.052	Article	English	14	Torres LMFC, Almeida MT, Santos TL, Marinho LES, de Mesquita JP, da Silva LM, Dos Santos WTP, Martins HR, Kato KC, Alves ESF, Liao LM, de Magalhães MTQ, de Mendonça FG, Pereira FV, Resende JM, Bemquerer MP, Rodrigues MA, Verly RM.	PubMed
370	Synergy Between Polyvinylpyrrolidone-Coated Silver Nanoparticles and Azole Antifungal Against Drug-Resistant Candida albicans		2016	10.1166/jnn.2016.10934	Article	English	43	Sun L, Liao K, Li Y, Zhao L, Liang S, Guo D, Hu J, Wang D.	PubMed
371	Bifunctional role of some biogenic nanoparticles in controlling wilt disease and promoting growth of common bean	Abstract: In the present era, nanomaterials are emerging as a powerful tool for management of plant disease and improving crop production to meet the growing global need for food. Thus, this paper was conducted to explore the effectiveness of five different types of nanoparticles (NPs) viz., Co3O4NPs, CuONPs, Fe3O4NPs, NiONPs, and ZnONPs as treatments for Fusarium wilt as well as their role in pr…	2023	10.1186/s13568-023-01546-7	Article	English	0	El-Sayed ER, Mohamed SS, Mousa SA, El-Seoud MAA, Elmehlawy AA, Abdou DAM.	PubMed
372	Biological treatment with fungi of olive mill wastewater pre-treated by photocatalytic oxidation with nanomaterials		2015	10.1016/j.ecoenv.2015.02.028	Article	English	34	Nogueira V, Lopes I, Freitas AC, Rocha-Santos TA, Gonçalves F, Duarte AC, Pereira R.	PubMed
373	One-step synthesis of blue-green luminescent carbon dots by a low-temperature rapid method and their high-performance antibacterial effect and bacterial imaging	Abstract: Due to the global infection problem caused by the abuse of antibiotics, the preparation of novel antibacterial nanomaterials is a key and basic requirement for applications in antibacterial and bacterial imaging fields. This paper reports the one-step preparation of blue–green-emitting carbon dots (CDs) under low temperature (80 °C) with glucose as the carbon source, citric acid as the …	2021	10.1088/1361-6528/abd8b0	Article		11	Zhao D, Zhang R, Liu X, Huang X, Xiao X, Yuan L.	PubMed
374	Wood-Based Nanocomposite Derived by in Situ Formation of Organic-Inorganic Hybrid Polymer within Wood via a Sol-Gel Method		2017	10.1021/acsami.7b01174	Article	English	46	Dong X, Zhuo X, Wei J, Zhang G, Li Y.	PubMed
375	Antifungal activity of amphotericin B conjugated to carbon nanotubes		2011	10.1021/nn1023522	Article	English	98	Benincasa M, Pacor S, Wu W, Prato M, Bianco A, Gennaro R.	PubMed
376	Surface functionalization of carbon nanomaterials by self-assembling hydrophobin proteins		2013	10.1002/bip.22146	Article	English	34	Yang W, Ren Q, Wu YN, Morris VK, Rey AA, Braet F, Kwan AH, Sunde M.	PubMed
377	Filamentous fungal in situ biosynthesis of heterogeneous Au/Cd(0.5)Zn(0.5)S nano-photocatalyst: A macroscopic assembly strategy for preparing composite mycelial pellets with visible light degradation ability		2021	10.1016/j.jhazmat.2020.124797	Article	English	5	Xu X, Yang Y, Jin H, Pang B, Jiang C, Shao D, Shi J.	PubMed
378	Antifungal coatings based on Ca(OH)2 mixed with ZnO/TiO2 nanomaterials for protection of limestone monuments		2013	10.1021/am302783h	Article	English	58	Gómez-Ortíz N, De la Rosa-García S, González-Gómez W, Soria-Castro M, Quintana P, Oskam G, Ortega-Morales B.	PubMed
379	Reduced Graphene Oxide Nanosheet-Decorated Copper Oxide Nanoparticles: A Potent Antifungal Nanocomposite against Fusarium Root Rot and Wilt Diseases of Tomato and Pepper Plants	Sustainable use of nanotechnology in crop protection requires an understanding of the plant’s life cycle, potential toxicological impacts of nanomaterials and their mechanism of action against the target pathogens. Herein, we show some properties of a candidate antifungal nanocomposite made from copper oxide (CuO; otherwise an essential soil nutrient) nanoparticles (NPs), with definite size and s…	2020	10.3390/nano10051001	Article	English	31	El-Abeid SE, Ahmed Y, Daròs JA, Mohamed MA.	PubMed
380	Gold Nanomaterial Uptake from Soil Is Not Increased by Arbuscular Mycorrhizal Colonization of Solanum Lycopersicum (Tomato)		2016	10.3390/nano6040068	Article	English	7	Judy JD, Kirby JK, McLaughlin MJ, Cavagnaro T, Bertsch PM.	PubMed
381	Antimicrobial activity and toxicological risk assessment of silver nanoparticles synthesized using an eco-friendly method with Gloeophyllum striatum		2021	10.1016/j.jhazmat.2021.126316	Article	English	17	Zawadzka K, Felczak A, Nowak M, Kowalczyk A, Piwoński I, Lisowska K.	PubMed
382	A Systematic Review of the Genotoxicity and Antigenotoxicity of Biologically Synthesized Metallic Nanomaterials: Are Green Nanoparticles Safe Enough for Clinical Marketing?	Background and objectives: Although studies have elucidated the significant biomedical potential of biogenic metallic nanoparticles (MNPs), it is very important to explore the hazards associated with the use of biogenic MNPs. Evidence indicates that genetic toxicity causes mutation, carcinogenesis, and cell death. Materials and Methods: Therefore, we systematically review original studies that in…	2019	10.3390/medicina55080439	Article	English	72	Barabadi H, Najafi M, Samadian H, Azarnezhad A, Vahidi H, Mahjoub MA, Koohiyan M, Ahmadi A.	PubMed
383	Chronic Exposure Effects of Silver Nanoparticles on Stream Microbial Decomposer Communities and Ecosystem Functions		2017	10.1021/acs.est.6b05508	Article	English	55	Tlili A, Jabiol J, Behra R, Gil-Allué C, Gessner MO.	PubMed
384	Ligand effect on controlling the synthesis of branched gold nanomaterials against fusarium wilt diseases	The widespread wilt disease caused by Fusarium solani spp is a pressing problem affecting crop production and intensive farming.	2022	10.1039/d2ra05478g	Article	English	0	Osonga FJ, Eshun GB, Sadik OA.	PubMed
385	Toxicological response of the model fungus Saccharomyces cerevisiae to different concentrations of commercial graphene nanoplatelets	Abstract: Graphene nanomaterials have attracted a great interest during the last years for different applications, but their possible impact on different biological systems remains unclear. Here, an assessment to understand the toxicity of commercial polycarboxylate functionalized graphene nanoplatelets (GN) on the unicellular fungal model Saccharomyces cerevisiae was performed. While cell prolif…	2020	10.1038/s41598-020-60101-7	Article	English	8	Suarez-Diez M, Porras S, Laguna-Teno F, Schaap PJ, Tamayo-Ramos JA.	PubMed
386	Soil chloride content influences the response of bacterial but not fungal diversity to silver nanoparticles entering soil via wastewater treatment processing		2019	10.1016/j.envpol.2019.113274	Article	English	7	Forstner C, Orton TG, Wang P, Kopittke PM, Dennis PG.	PubMed
387	Dual effects of nZVI on maize growth and water use are positively mediated by arbuscular mycorrhizal fungi via rhizosphere interactions		2022	10.1016/j.envpol.2022.119661	Article	English	2	Yang YM, Naseer M, Zhu Y, Zhu SG, Wang S, Wang BZ, Wang J, Zhu H, Wang W, Tao HY, Xiong YC.	PubMed
388	Cu(2)O nanoparticles synthesized by green and chemical routes, and evaluation of their antibacterial and antifungal effect on functionalized textiles		2023	10.1016/j.btre.2023.e00785	Article	English	1	Asmat-Campos D, de Oca-Vásquez GM, Rojas-Jaimes J, Delfín-Narciso D, Juárez-Cortijo L, Nazario-Naveda R, Batista Menezes D, Pereira R, de la Cruz MS.	PubMed
389	Analysis of the Phlebiopsis gigantea genome, transcriptome and secretome provides insight into its pioneer colonization strategies of wood		2014	10.1371/journal.pgen.1004759	Article	English	84	Hori C, Ishida T, Igarashi K, Samejima M, Suzuki H, Master E, Ferreira P, Ruiz-Dueñas FJ, Held B, Canessa P, Larrondo LF, Schmoll M, Druzhinina IS, Kubicek CP, Gaskell JA, Kersten P, St John F, Glasner J, Sabat G, Splinter BonDurant S, Syed K, Yadav J, Mgbeahuruike AC, Kovalchuk A, Asiegbu FO, Lackner G, Hoffmeister D, Rencoret J, Gutiérrez A, Sun H, Lindquist E, Barry K, Riley R, Grigoriev IV, H…	PubMed
390	Toxicity of silver nanoparticle in rat ear and BALB/c 3T3 cell line		2014	10.1186/s12951-014-0052-6	Article	English	34	Zou J, Feng H, Mannerström M, Heinonen T, Pyykkö I.	PubMed
391	Nanoparticles Composed of Zn and ZnO Inhibit Peronospora tabacina Spore Germination in vitro and P. tabacina Infectivity on Tobacco Leaves		2016	10.3390/nano6030050	Article	English	47	Wagner G, Korenkov V, Judy JD, Bertsch PM.	PubMed
392	Bioengineered silver nanoparticles using Curvularia pallescens and its fungicidal activity against Cladosporium fulvum		2017	10.1016/j.sjbs.2016.09.019	Article	English	21	Elgorban AM, El-Samawaty AEM, Abd-Elkader OH, Yassin MA, Sayed SRM, Khan M, Farooq Adil S.	PubMed
393	Silica Nanoparticles Functionalized with Zwitterionic Sulfobetaine Siloxane for Application as a Versatile Antifouling Coating System		2017	10.1021/acsami.7b04840	Article	English	71	Knowles BR, Wagner P, Maclaughlin S, Higgins MJ, Molino PJ.	PubMed
394	Impact of different magnetic materials added to silver-magnetite nanoparticles on the structural, magnetic and antimicrobial properties	Abstract: Different magnetic materials of spinel copper and cobalt nanoferrites added to silver–magnetite nanoparticles were fabricated by a facile, low cost, and rapid auto-combustion method to form a nanocomposite. X-ray diffraction patterns and atomic force microscopy were studied for the investigated samples and confirmed their nanosize range. Adding cobalt nanoferrite to silver–magnetite (Co…	2023	10.1140/epjs/s11734-022-00759-4	Article	English	2	El-Bassuony AAH, Gamal WM, Abdelsalam HK.	PubMed
395	The Positive Fate of Biochar Addition to Soil in the Degradation of PHBV-Silver Nanoparticle Composites		2018	10.1021/acs.est.8b01524	Article	English	31	Gonçalves SPCC, Strauss M, Martinez DST.	PubMed
396	Mycogenesis of gold nanoparticles using a phytopathogen Alternaria alternata		2012	10.1007/s00449-011-0646-4	Article	English	99	Sarkar J, Ray S, Chattopadhyay D, Laskar A, Acharya K.	PubMed
397	Transcriptomics Reveals the Killing Mechanism by Which Entomopathogenic Fungi Manipulate the RNA Expression Profiles of Termites and Provides Inspiration for Green Pest Management		2023	10.1021/acs.jafc.3c00743	Article	English	0	Liu L, Wang DH, Zhao CC, Yan FM, Lei CL, Su LJ, Zhang YC, Huang QY, Tang QB.	PubMed
398	Bismuth Nanoantibiotics Display Anticandidal Activity and Disrupt the Biofilm and Cell Morphology of the Emergent Pathogenic Yeast Candida auris	Candida auris is an emergent multidrug-resistant pathogenic yeast, which forms biofilms resistant to antifungals, sanitizing procedures, and harsh environmental conditions. Antimicrobial nanomaterials represent an alternative to reduce the spread of pathogens—including yeasts—regardless of their drug-resistant profile. Here we have assessed the antimicrobial activity of easy-to-synthesize bismuth…	2020	10.3390/antibiotics9080461	Article	English	10	Vazquez-Munoz R, Lopez FD, Lopez-Ribot JL.	PubMed
399	COMPARATIVE PHYSIOCHEMICAL ANALYSIS OF HYDROPHOBINS PRODUCED IN ESCHERICHIA COLI AND PICHIA PASTORIS		2017	10.1016/j.colsurfb.2017.08.058	Article	English	10	Przylucka A, Akcapinar GB, Bonazza K, Mello-de-Sousa TM, Mach-Aigner AR, Lobanov V, Grothe H, Kubicek CP, Reimhult E, Druzhinina IS.	PubMed
400	Biomineralization mechanism of gold by zygomycete fungi Rhizopus oryzae		2012	10.1021/nn301502s	Article	English	129	Das SK, Liang J, Schmidt M, Laffir F, Marsili E.	PubMed
401	Quantitative and qualitative analysis of ochratoxin-A using fluorescent CQDs@DNA-based nanoarchitecture assembly to monitor food safety and quality	Ochratoxin A (OTA), a mycotoxin formed by various fungi, such as Aspergillus and Penicillium species, is dangerous to human health.	2023	10.1039/d3ay00209h	Article	English	0	Singh A, Singh G, Kaur N, Singh N.	PubMed
402	The anti-fasciolasis properties of silver nanoparticles produced by Trichoderma harzianum and their improvement of the anti-fasciolasis drug triclabendazole		2013	10.3390/ijms141121887	Article	English	36	Gherbawy YA, Shalaby IM, El-Sadek MS, Elhariry HM, Abdelilah BA.	PubMed
403	Fungus-mediated biotransformation of amorphous silica in rice husk to nanocrystalline silica		2006	10.1021/ja062113+	Article	English	150	Bansal V, Ahmad A, Sastry M.	PubMed
404	Solid lipid nanoparticles affect microbial colonization and enzymatic activity throughout the decomposition of alder leaves in freshwater microcosms		2017	10.1016/j.ecoenv.2016.10.020	Article	English	5	Sampaio AC, Mendes RJ, Castro PG, Silva AM.	PubMed
405	Green Biofabrication of Silver Nanoparticles of Potential Synergistic Activity with Antibacterial and Antifungal Agents against Some Nosocomial Pathogens	Nosocomial bacterial and fungal infections are one of the main causes of high morbidity and mortality worldwide, owing to the high prevalence of multidrug-resistant microbial strains. Hence, the study aims to synthesize, characterize, and investigate the antifungal and antibacterial activity of silver nanoparticles (AgNPs) fabricated using Camellia sinensis leaves against nosocomial pathogens. Th…	2023	10.3390/microorganisms11040945	Article	English	1	Al-Otibi FO, Yassin MT, Al-Askar AA, Maniah K.	PubMed
406	Fungus-mediated biological synthesis of gold nanoparticles: potential in detection of liver cancer		2011	10.2147/ijn.s23195	Article	English	30	Chauhan A, Zubair S, Tufail S, Sherwani A, Sajid M, Raman SC, Azam A, Owais M.	PubMed
407	Novel fungus-titanate bio-nanocomposites as high performance adsorbents for the efficient removal of radioactive ions from wastewater		2014	10.1039/c3nr03467d	Article	English	21	Xu M, Wei G, Liu N, Zhou L, Fu C, Chubik M, Gromov A, Han W.	PubMed
408	Oxidative stress in microbes after exposure to iron nanoparticles: analysis of aldehydes as oxidative damage products of lipids and proteins		2019	10.1007/s11356-019-06370-w	Article	English	20	Semerád J, Moeder M, Filip J, Pivokonský M, Filipová A, Cajthaml T.	PubMed
409	Copolymer-nanocapsules of zinc phenyl-thio-phthalocyanine and amphotericin-B in association with antimicrobial photodynamic therapy (A-PDT) applications against Candida albicans yeasts		2021	10.1016/j.pdpdt.2021.102273	Article	English	8	Evangelista RP, Amantino CF, Pietro RCLR, Sorrechia R, Piazza RD, Marques RFC, Tedesco AC, Primo FL.	PubMed
410	In Vitro Evaluation of the Antifungal Effect of AgNPs on Fusarium oxysporum f. sp. lycopersici	The application of nanomaterials in the agri-food industry can lead us to the formulation of new sustainable and effective pesticides for the control of fungi such as Fusarium oxysporum f. sp. lycopersici (Fol). This is a fungal plant pathogen for the tomato plant. In this work, silver nanoparticles (AgNPs) were synthesized by a green methodology from Geranium leaf extract as a reducing agent. Th…	2023	10.3390/nano13071274	Article	English	0	Macías Sánchez KL, González Martínez HDR, Carrera Cerritos R, Martínez Espinosa JC.	PubMed
411	Antifungal, antibacterial, antibiofilm and colorimetric sensing of toxic metals activities of eco friendly, economical synthesized Ag/AgCl nanoparticles using Malva Sylvestris leaf extracts		2018	10.1016/j.micpath.2018.08.054	Article	English	34	Feizi S, Taghipour E, Ghadam P, Mohammadi P.	PubMed
412	Biogenic Synthesis, Characterization and Evaluation of Silver Nanoparticles from Aspergillus niger JX556221 Against Human Colon Cancer Cell Line HT-29		2018	10.1166/jnn.2018.15364	Article	English	20	Chengzheng W, Jiazhi W, Shuangjiang C, Swamy MK, Sinniah UR, Akhtar MS, Umar A.	PubMed
413	Oligonucleotide-capped nanoporous anodic alumina biosensor as diagnostic tool for rapid and accurate detection of Candida auris in clinical samples		2021	10.1080/22221751.2020.1870411	Article	English	11	Pla L, Santiago-Felipe S, Tormo-Mas MÁ, Ruiz-Gaitán A, Pemán J, Valentín E, Sancenón F, Aznar E, Martínez-Máñez R.	PubMed
414	Mechanical and vibrational characterization of amyloid-like HET-s nanosheets based on the skewed plate theory	<p>Fungal prion protein HET-s forms a skewed amyloid-like sheet structure at a certain pH condition. We investigate the mechanical characteristics of coarse-grained HET-s amyloid-like sheet model using vibrational methods.</p>	2017	10.1039/c7cp01418j	Article	English	0	Chang HJ, Lee M, Kim JI, Yoon G, Na S.	PubMed
415	Biosynthesis of Anti-Proliferative Gold Nanoparticles Using Endophytic Fusarium oxysporum Strain Isolated from Neem (A. indica) Leaves		2016	10.2174/1568026616666160215160644	Article	English	18	Siddiqui EA, Ahmad A, Julius A, Syed A, Khan S, Kharat M, Pai K, Kadoo N, Gupta V.	PubMed
416	Bismuth nanoparticles obtained by a facile synthesis method exhibit antimicrobial activity against Staphylococcus aureus and Candida albicans	Abstract: Background: Bismuth compounds are known for their activity against multiple microorganisms; yet, the antibiotic properties of bismuth nanoparticles (BiNPs) remain poorly explored. The objective of this work is to further the research of BiNPs for nanomedicine-related applications. Stable Polyvinylpyrrolidone (PVP)-coated BiNPs were produced by a chemical reduction process, in less than …	2020	10.1186/s42490-020-00044-2	Article	English	30	Vazquez-Munoz R, Arellano-Jimenez MJ, Lopez-Ribot JL.	PubMed
417	Transformations of Nanoenabled Copper Formulations Govern Release, Antifungal Effectiveness, and Sustainability throughout the Wood Protection Lifecycle		2018	10.1021/acs.est.7b04130	Article	English	31	Pantano D, Neubauer N, Navratilova J, Scifo L, Civardi C, Stone V, von der Kammer F, Müller P, Sobrido MS, Angeletti B, Rose J, Wohlleben W.	PubMed
418	Biogenic synthesis and characterization of silver nanoparticles using aqueous leaf extract of Scoparia dulcis L. and assessment of their antimicrobial property		2020	10.1080/01480545.2018.1505903	Article	English	11	Parvataneni R.	PubMed
419	Oxidative enzymatic response of white-rot fungi to single-walled carbon nanotubes		2014	10.1016/j.envpol.2014.06.013	Article	English	38	Berry TD, Filley TR, Blanchette RA.	PubMed
420	Antifungal effects of BiOBr nanosheets carrying surfactant cetyltrimethylammonium bromide		2018	10.7555/jbr.32.20180043	Article		1	Sun MQ, Ding ZL, Wang H, Yu GP, Li BZ, Li MC, Zhen MM.	PubMed
421	Utilizing metal tolerance potential of soil fungus for efficient synthesis of gold nanoparticles with superior catalytic activity for degradation of rhodamine B		2016	10.1016/j.jenvman.2016.08.021	Article	English	74	Bhargava A, Jain N, Khan MA, Pareek V, Dilip RV, Panwar J.	PubMed
422	Combined efficacy of biologically synthesized silver nanoparticles and different antibiotics against multidrug-resistant bacteria		2013	10.2147/ijn.s49284	Article	English	194	Naqvi SZ, Kiran U, Ali MI, Jamal A, Hameed A, Ahmed S, Ali N.	PubMed
423	Marinobacter lipolyticus from Red Sea for lipase production and modulation of silver nanomaterials for anti-candidal activities		2017	10.1049/iet-nbt.2016.0104	Article	English	19	Oves M, Qari HA, Felemban NM, Khan MZ, Rehan ZA, Ismail IMI.	PubMed
424	Biogenic silver nanoparticles using Rhinacanthus nasutus leaf extract: synthesis, spectral analysis, and antimicrobial studies		2013	10.2147/ijn.s49000	Article	English	60	Pasupuleti VR, Prasad TN, Shiekh RA, Balam SK, Narasimhulu G, Reddy CS, Ab Rahman I, Gan SH.	PubMed
425	Extracellular biosynthesis of cobalt ferrite nanoparticles by Monascus purpureus and their antioxidant, anticancer and antimicrobial activities: Yield enhancement by gamma irradiation		2020	10.1016/j.msec.2019.110318	Article	English	46	El-Sayed ER, Abdelhakim HK, Zakaria Z.	PubMed
426	Preparation of Nanomaterial Wettable Powder Formulations of Antagonistic Bacteria from Phellodendron chinense and the Biological Control of Brown Leaf Spot Disease		2021	10.5423/ppj.oa.02.2021.0020	Article	English	5	Zeng Y, Liu H, Zhu T, Han S, Li S.	PubMed
427	Engineered nanomaterial transformation under oxidative environmental conditions: development of an in vitro biomimetic assay		2009	10.1021/es802217y	Article	English	50	Metz KM, Mangham AN, Bierman MJ, Jin S, Hamers RJ, Pedersen JA.	PubMed
428	Eco-friendly synthesis of silver nanoparticles using Senna alata bark extract and its antimicrobial mechanism through enhancement of bacterial membrane degradation		2019	10.1016/j.mimet.2019.105692	Article	English	37	Ontong JC, Paosen S, Shankar S, Voravuthikunchai SP.	PubMed
429	Green Synthesis of Zinc Oxide Nanoparticles Using Salvia officinalis Leaf Extract and Their Photocatalytic and Antifungal Activities	The facile bio-fabrication of zinc oxide (ZnO) nanoparticles (NPs) is described in this study using an aqueous leaf extract of Salvia officinalis L. as an efficient stabilizing/capping agent. Biosynthesis of nanomaterials using phytochemicals present in the plants has received great attention and is gaining significant importance as a possible alternative to the conventional chemical methods. The…	2021	10.3390/biology10111075	Article	English	34	Abomuti MA, Danish EY, Firoz A, Hasan N, Malik MA.	PubMed
430	The potential phototoxicity of nano-scale ZnO induced by visible light on freshwater ecosystems		2018	10.1016/j.chemosphere.2018.06.040	Article	English	11	Du J, Qv M, Zhang Y, Yin X, Wan N, Zhang B, Zhang H.	PubMed
431	A novel strategy to enhance biohydrogen production using graphene oxide treated thermostable crude cellulase and sugarcane bagasse hydrolyzate under co-culture system		2018	10.1016/j.biortech.2018.09.038	Article	English	39	Srivastava N, Srivastava M, Gupta VK, Ramteke PW, Mishra PK.	PubMed
432	Development of a novel myconanomining approach for the recovery of agriculturally important elements from jarosite waste		2018	10.1016/j.jes.2017.09.017	Article	English	11	Bedi A, Singh BR, Deshmukh SK, Aggarwal N, Barrow CJ, Adholeya A.	PubMed
433	Biosynthesis of Silver Nanoparticles and Exploring Their Potential of Reducing the Contamination of the In Vitro Culture Media and Inducing the Callus Growth of Rumex nervosus Explants	Among biological methods, green synthesis of the nanomaterials using plant extracts was shown to be an environmentally friendly, economical, and simple approach. In the current study, the biogenic synthesis of silver nanoparticles (AgNPs) was achieved using the leaf extract of Hibiscus tiliaceus, in order to prevent the contamination of the tissue culture media and induce callus growth. The nanos…	2023	10.3390/molecules28093666	Article	English	0	Alfarraj NS, Tarroum M, Al-Qurainy F, Nadeem M, Khan S, Salih AM, Shaikhaldein HO, Al-Hashimi A, Alansi S, Perveen K.	PubMed
434	Nano-functionalized filamentous fungus hyphae with fast reversible macroscopic assembly & disassembly features	<p>Hyphae help polyaniline nanoparticles to assemble &amp; disassemble macroscopically.</p>	2015	10.1039/c5cc00871a	Article	English	26	Wang H, Li X, Chai L, Zhang L.	PubMed
435	Effect of H(2)O(2) @CuONPs in the UV Light-Induced Removal of Organic Pollutant Congo Red Dye: Investigation into Mechanism with Additional Biomedical Study	Hazardous dyes in industrial wastewater are an internationally recognized issue for community health. Nanoparticles synthesized through green protocols are a fascinating research field with numerous applications. The current study mainly aimed to investigate the degradation of Congo red (CR) dye under UV light in the presence of H2O2 and the photocatalytic activity of copper oxide nanoparticles (…	2023	10.3390/molecules28010410	Article	English	0	Latif S, Abdulaziz F, Alanazi AM, Alsehli AH, Alsowayigh MM, Alanazi AA.	PubMed
436	Sustainable green approach to synthesize Fe(3)O(4)/α-Fe(2)O(3) nanocomposite using waste pulp of Syzygium cumini and its application in functional stability of microbial cellulases	Abstract: Synthesis of nanomaterials following green routes have drawn much attention in recent years due to the low cost, easy and eco-friendly approaches involved therein. Therefore, the current study is focused towards the synthesis of Fe3O4/α-Fe2O3 nanocomposite using waste pulp of Jamun (Syzygium cumini) and iron nitrate as the precursor of iron in an eco-friendly way. The synthesized Fe3O4/…	2021	10.1038/s41598-021-03776-w	Article	English	8	Srivastava N, Srivastava M, Alhazmi A, Mohammad A, Khan S, Pal DB, Haque S, Singh R, Mishra PK, Gupta VK.	PubMed
437	Recent advances and achievements in nanomaterial-based, and structure switchable aptasensing platforms for ochratoxin A detection		2013	10.3390/s131115187	Article	English	49	Hayat A, Yang C, Rhouati A, Marty JL.	PubMed
438	Biosynthesis and characterization of Au-nanostructures by metal tolerant fungi		2011	10.1002/jobm.201100157	Article	English	3	Gupta S, Devi S, Singh K.	PubMed
439	Single-walled carbon nanotubes alter soil microbial community composition		2014	10.1016/j.scitotenv.2013.07.035	Article	English	76	Jin L, Son Y, DeForest JL, Kang YJ, Kim W, Chung H.	PubMed
440	Biogenic silver nanoparticles and stressors generate synergistic growth inhibition in Candida species through cell wall damage, osmotic stress, and oxidative stress	objective:: Evaluate the antifungal activity and adjuvant properties of biogenic silver nanoparticles in different Candida species (C. parapsilosis, C. glabrata, and C. albicans). method:: The biogenic metallic nanoparticles were developed by quercetin-mediated biological synthesis. The physicochemical properties were studied by light scattering, electrophoretic mobility, UV-vis and infrared spec…	2023	10.2174/1389201024666230303145653	Article	English	0	Cervantes-Chávez JA, García-Bouchot G, García-Gutiérrez N, Vergara-Castañeda HA, Nava-Mendoza R, Luna-Bárcenas G, Elizalde-Peña EA, Esquivel-Naranjo EU, Landeros-Jaime F, Rojas-Avelizapa NG, Pool H.	PubMed
441	Antifungal Activity of Juglans-regia-Mediated Silver Nanoparticles (AgNPs) against Aspergillus-ochraceus-Induced Toxicity in In Vitro and In Vivo Settings	Aflatoxins produced by some species of Aspergillus are considered secondary toxic fungal by-products in feeds and food. Over the past few decades, many experts have focused on preventing the production of aflatoxins by Aspergillus ochraceus and also reducing its toxicity. Applications of various nanomaterials in preventing the production of these toxic aflatoxins have received a lot of attention …	2023	10.3390/jfb14040221	Article	English	0	Naqvi SIZ, Kausar H, Afzal A, Hashim M, Mujahid H, Javed M, Hano C, Anjum S.	PubMed
442	Easy conversion of protein-rich enoki mushroom biomass to a nitrogen-doped carbon nanomaterial as a promising metal-free catalyst for oxygen reduction reaction	<p>A protein-rich enoki mushroom biomass is here reported to be the nitrogen source for the original design of a nitrogen-doped carbon nanomaterial, which can act as a metal-free catalyst for oxygen reduction reaction.</p>	2015	10.1039/c5nr03828f	Article	English	129	Guo C, Liao W, Li Z, Sun L, Chen C.	PubMed
443	Biogenic enabled in-vitro synthesis of nickel cobaltite nanoparticle and its application in single stage hybrid biohydrogen production		2021	10.1016/j.biortech.2021.126006	Article	English	8	Srivastava N, Mohammad A, Srivastava M, Syed A, Elgorban AM, Bahadur Pal D, Mishra PK, Yoon T, Gupta VK.	PubMed
444	Silver Nanoantibiotics Display Strong Antifungal Activity Against the Emergent Multidrug-Resistant Yeast Candida auris Under Both Planktonic and Biofilm Growing Conditions		2020	10.3389/fmicb.2020.01673	Article		20	Vazquez-Munoz R, Lopez FD, Lopez-Ribot JL.	PubMed
445	Zirconia enrichment in zircon sand by selective fungus-mediated bioleaching of silica		2007	10.1021/la062535x	Article	English	45	Bansal V, Syed A, Bhargava SK, Ahmad A, Sastry M.	PubMed
446	An evaluation of the impact of multiwalled carbon nanotubes on soil microbial community structure and functioning		2013	10.1016/j.jhazmat.2013.07.031	Article	English	123	Shrestha B, Acosta-Martinez V, Cox SB, Green MJ, Li S, Cañas-Carrell JE.	PubMed
447	Biogenic synthesis of silver nanoparticles and their synergistic effect with antibiotics: a study against gram-positive and gram-negative bacteria		2010	10.1016/j.nano.2009.04.006	Article	English	932	Fayaz AM, Balaji K, Girilal M, Yadav R, Kalaichelvan PT, Venketesan R.	PubMed
448	In Situ Formation of Ag Nanoparticles in Mesoporous TiO(2) Films Decorated on Bamboo via Self-Sacrificing Reduction to Synthesize Nanocomposites with Efficient Antifungal Activity	We developed a novel green approach for the in situ fabrication of Ag NPs in mesoporous TiO2 films via the bamboo self-sacrificing reduction of Ag(NH3)2+ ions, which can inhibit fungal growth on the bamboo surface. Mesoporous anatase TiO2 (MT) films were first synthesized on bamboo via a hydrothermal method. Then, Ag NPs with a 5.3 nm mean diameter were incorporated into the pore channels of opti…	2019	10.3390/ijms20215497	Article	English	20	Li J, Su M, Wang A, Wu Z, Chen Y, Qin D, Jiang Z.	PubMed
449	Phase-assisted synthesis and DNA unpacking evaluation of biologically inspired metallo nanocomplexes using peptide as unique building block		2011	10.1016/j.jcis.2011.08.034	Article	English	4	Raman N, Sudharsan S.	PubMed
450	Enzyme mediated extracellular synthesis of CdS nanoparticles by the fungus, Fusarium oxysporum		2002	10.1021/ja027296o	Article	English	440	Ahmad A, Mukherjee P, Mandal D, Senapati S, Khan MI, Kumar R, Sastry M.	PubMed
451	New Perspectives for the Consolidation of Mural Paintings in Hypogea with an Innovative Aqueous Nanolime Dispersion, Characterized by Compatible, Sustainable, and Eco-Friendly Features	Consolidation of mural paintings in hypogea is challenging because of their severe microclimatic conditions, characterized by high humidity levels, low air circulation, the presence of salts efflorescence, and the detrimental growth of biodeteriogen agents. Traditional consolidant products show significant drawbacks when used in hypogeum. Organic compounds, such as acrylic emulsions, are bio-rece…	2023	10.3390/nano13020317	Article	English	1	Iafrate S, Sidoti G, Capasso FE, Giandomenico M, Muca S, Daniele V, Taglieri G.	PubMed
452	Physiological effect of multi-walled carbon nanotubes (MWCNTs) on conidia of the entomopathogenic fungus, Paecilomyces fumosoroseus (Deuteromycotina: Hyphomycetes)		2009	10.1080/10934520903263603	Article	English	18	Gorczyca A, Kasprowicz MJ, Lemek T.	PubMed

## Sheet: FungalMicrofilaments_duplicates
Item	Title	Abstract	Year	DOI	Document Type	Language	Cited By	Author(s)	Repository	Duplicate Type
1	Mushroom-derived chitosan-glucan nanopaper filters for the treatment of water	Contaminated water represents a significant threat to public health, with heavy metals present in industrial effluents constituting a particular hazard. Conventional heavy metal removal processes are often expensive and rely on synthetic materials. Renewable adsorbents or filters, such as chitosan, provide a low-cost, simple alternative for treatment of water. Fungal chitin and hence fungal chito…	2020	10.1016/j.reactfunctpolym.2019.104428	Article	English	24	Janesch, J; Jones, M; Bacher, M; Kontturi, E; Bismarck, A; Mautner, A	Web of Science	By DOI
2	Extraction and characterization of fungal chitin nanofibers from Mucor indicus cultured in optimized medium conditions	Chitin nanofibers (ChNFs) were extracted from Mucor indicus by a purification method followed by a mechanical treatment, cultivated under obtained optimum culture medium conditions to improve fungal chitin production rate. A semi synthetic media containing 50 g/l glucose was used for cultivation of the fungus in shake flasks. The cell wall analysis showed that N-acetyl glucosamine (GlcNAc) conten…	2021	10.1016/j.ijbiomac.2020.11.066	Article	English	3	Salehinik, F; Behzad, T; Zamani, A; Bahrami, B	Web of Science	By DOI
3	Fungal chitin-glucan nanopapers with heavy metal adsorption properties for ultrafiltration of organic solvents and water	Membranes and filters are essential devices, both in the laboratory for separation of media, solvent recovery, organic solvent and water filtration purposes, and in industrial scale applications, such as the removal of industrial pollutants, e.g. heavy metal ions, from water. Due to their solvent stability, biologically sourced and renewable membrane or filter materials, such as cellulose or chit…	2021	10.1016/j.carbpol.2020.117273	Article	English	27	Yousefi, N; Jones, M; Bismarck, A; Mautner, A	Web of Science	By DOI
4	Nanoparticle and nanomineral production by fungi	Fungi show a variety of abilities in affecting metal speciation, toxicity, and mobility and mineral formation, dissolution or deterioration through several interacting biomechanical and biochemical mechanisms. A consequence of many metal-mineral interactions is the production of nanoparticles which may be in elemental, mineral or compound forms. Or-ganisms may benefit from such nanomaterial forma…	2022	10.1016/j.fbr.2021.07.003	Article	English	8	Li, QW; Liu, FX; Li, M; Chen, CM; Gadd, GM	Web of Science	By DOI
5	Fungal chitin-glucan nanopapers with heavy metal adsorption properties for ultrafiltration of organic solvents and water		2021	10.1016/j.carbpol.2020.117273				Yousefi N, Jones M, Bismarck A, Mautner A.	PubMed	By DOI
6	Extraction and characterization of fungal chitin nanofibers from Mucor indicus cultured in optimized medium conditions		2021	10.1016/j.ijbiomac.2020.11.066				Salehinik F, Behzad T, Zamani A, Bahrami B.	PubMed	By DOI
7	Formation of amphipathic amyloid monolayers from fungal hydrophobin proteins		2013	10.1007/978-1-62703-354-1_7				Morris VK, Sunde M.	PubMed	By Title

## Sheet: FungalSkin_unique
Item	Title	Abstract	Year	DOI	Document Type	Language	Cited By	Author(s)	Repository
1	Increasing incidence of Trichophyton tonsurans in Munich—A single-centre observation	Background: Tinea capitis and tinea corporis are highly prevalent fungal skin infections, which globally are mainly caused by Microsporum canis and Trichophyton rubrum, respectively. While in the United States and Great Britain Trichophyton tonsurans is widely prevalent as a causative pathogen, it so far only plays a minor role in Germany. Objectives: Since the frequency of pathogenic species var…	2023	10.1111/myc.13563	Article	English	1	Pilz J.F., Köberle M., Kain A., Seidl P., Zink A., Biedermann T., Pilz A.C.	Scopus/Web of Science/PubMed
2	Together or Alone: Evaluating the Pathogen Inhibition Potential of Bacterial Cocktails against an Amphibian Pathogen	The amphibian fungal skin disease Batrachochytrium dendrobatidis (Bd) has caused major biodiversity losses globally. Several experimental trials have tested the use of Janthinobacterium lividum to reduce mortality due to Bd infections, usually in single-strain amendments. It is well-characterized in terms of its anti-Bd activity mechanisms. However, there are many other microbes that inhibit Bd i…	2023	10.1128/spectrum.01518-22	Article	English	0	Alexiev A., Chen M.Y., Korpita T., Weier A.M., McKenzie V.J.	Scopus/Web of Science/PubMed
3	Association of Adult Atopic Dermatitis Severity With Bacterial, Viral, and Fungal Skin Infections	Background: Little is known about the relationship of atopic dermatitis (AD) severity, phenotype, and persistence on different types of skin infections. Objective: To evaluate the relationship of AD characteristics and skin infections over time in adults. Methods: We performed a prospective dermatology practice-based study (n = 559). History of infection was assessed using questionnaires. AD seve…	2023	10.1089/derm.2022.29006.jrd	Article	English	0	Rios-Duarte J.A., Silverberg J.I.	Scopus/PubMed
4	Facile synthesis, pharmacological and In silico analysis of succinimide derivatives: An approach towards drug discovery	The hybrid heterocyclic scaffolds possess extensive medicinal values and significant pharmaceutical usage. A series of N-substituted-2,5-dioxopyrrolidine carboxamides/carbothioamides have been synthesized under aqueous conditions using clean microwave irradiation technology. The quantum chemical data and chemical reactivity parameters of the title compounds have been derived by DFT execution. The…	2023	10.1016/j.molstruc.2022.134424	Article	English	1	Rasgania J., Gavadia R., Jakhar K.	Scopus/Web of Science
5	Features of the Formation of Sensitive Films Based on Mycelium of Higher Fungi for Surface and Plate Acoustic Waves Gas Sensors	A comparative analysis of the responses of two types of acoustic waves (surface SAW and plate APW) with close frequencies and the same type of waves (SAW) with different frequencies toward various liquid vapors (water, acetone, ethanol) was carried out in this paper. Two types of films based on mycelium of higher fungus Ganoderma lucidum (Curtis) P. Karst (G. lucidum) prepared by various methods …	2023	10.3390/s23042216	Article	English	0	Smirnov A., Anisimkin V., Krasnopolskaya L., Guliy O., Sinev I., Simakov V., Golyshkin A., Almyasheva N., Ageykin N., Kuznetsova I.	Scopus/Web of Science/PubMed
6	A safe bioadhesive system for topical delivery of combined antimicrobials in treatment of skin infections in veterinary medicine	Bacterial and fungal skin infections are common both in humans and animals, especially in companion animals such as cats and dogs. Use of systemic antimicrobial drugs for the treatment of skin infections has resulted in increased antimicrobial resistance (AMR) in both animals and humans. Under “One Health” approach, one of the strategies to overcome AMR is topical delivery of combined antimicrobi…	2023	10.1016/j.jddst.2022.104116	Article	English	0	Türkmen E., Parmaksız S., Nigiz, Sağıroğlu M., Şenel S.	Scopus/Web of Science
7	Development of the Formulation and Evaluation of the Anti-inflammatory Activity of Vitex negundo Gel and Latex	Essential oils include Vitex negundo Linn. It is used in the treatment of eye diseases, toothache, redness, white spots, splenomegaly, skin ulcers, catarrh, rheumatoid arthritis, gonorrhea and bronchitis. It is also used as a tonic, insect repellent, emulsifier, menstrual aid, antibacterial, antipyretic and antihistamine. Preparations from plant parts of V. negundo treat a variety of ailments, in…	2023	10.25258/ijpqa.14.1.27	Article	English	0	Rajguru J.R., Shirsat M.K., Navale S.D.	Scopus
8	Fungal Engineered Living Materials: The Viability of Pure Mycelium Materials with Self-Healing Functionalities	Engineered living materials (ELMs) composed entirely of fungal cells offer significant potential due to their functional properties such as self-assembly, sensing, and self-healing. Alongside rapid developments in the ELM field, there is significant and growing interest in mycelium materials, which are made from the vegetative part of filamentous fungi, as a potential source of advanced functiona…	2023	10.1002/adfm.202301875	Article	English	0	Elsacker E., Zhang M., Dade-Robertson M.	Scopus/Web of Science
9	Recent advances in Raman spectroscopy for skin diagnosis	The skin is the largest organ in humans. It comprises about 16% of our body. Many diseases originate from the skin, including acne vulgaris, skin cancer, fungal skin disease, etc. As a common skin cancer in China, melanoma alone grows at year rate of nearly 4%. Therefore, it is crucial to develop an objective, reliable, accurate, non-invasive, and easy-to-use diagnostic method for skin diseases t…	2023	10.1142/s1793545823300033	Review	English	1	Wu M., Gao B., Wei X.	Scopus/Web of Science
10	Tinea versicolor in a premature infant	Tinea versicolor (TV) is a fungal skin infection that classically affects adolescents and young adults. Occasionally, it may be seen on the face of infants. We report an unusual case of widespread cutaneous TV in a premature infant. © 2023 Wiley Periodicals LLC.	2023	10.1111/pde.15247	Article	English	0	Musicante M., Bembry R., Wright T.S.	Scopus/Web of Science/PubMed
11	Characterization of Pseudogymnoascus destructans conidial adherence to extracellular matrix: Association with fungal secreted proteases and identification of candidate extracellular matrix binding proteins	Pseudogymnoascus destructans is the etiological agent of white-nose syndrome (WNS), a fungal skin infection of hibernating bats. Pathophysiology of the disease involves disruption of bat metabolism and hibernation patterns, which subsequently causes premature emergence and mortality. However, information on the mechanism(s) and virulence factors of P. destructans infection is minimally known. Typ…	2023	10.1016/j.micpath.2022.105895	Article	English	0	Eiamcharoen P., Gelli A., Byrne B.A., Keel M.K.	Scopus/Web of Science/PubMed
12	Dermoscopy of Bacterial, Viral, and Fungal Skin Infections: A Systematic Review of the Literature	Over the last three decades, the use of dermoscopy has been extended to inflammatory and infectious dermatoses. Regarding the latter, while the first applications concerned skin parasitoses, there has been a significant increase in the publication trend regarding nonparasitic dermatoses over recent years, yet data on this topic are sparse and often lack a standardized analytical approach. This sy…	2023	10.1007/s13555-022-00855-2	Review	English	0	Chauhan P., Meena D., Errichetti E.	Scopus/Web of Science/PubMed
13	Saprophytic bacteria and fungi colonize stearoyl coenzyme-A desaturase-1 knockout skin	Lipids synthesized on the skin are critical to the antimicrobial barrier. Skin lipids also facilitate survival of lipophilic skin commensals in an otherwise dry and acidic ecological landscape. Thus, skin-specific stearoyl-coenzyme A desaturase 1 knockout mice (Scd1ΔK14) with sebocyte atrophy and decreased synthesis of monounsaturated fatty acids, triglycerides and wax diesters have dry, inflamed…	2023	10.1111/exd.14676	Article	English	1	Pyle H.J., Artami M., Edwards M., Raj P., Zhang B., Arana C., Harris-Tryon T.A.	Scopus/Web of Science/PubMed
14	Tinea pedis in underrepresented groups: All of Us database analysis	Background: Tinea pedis is the most common form of dermatophytosis resulting in interdigital infections. All of Us (AoU) is a National Institute of Health initiative with an emphasis on patient populations traditionally underrepresented in biomedical research. Objectives: Our objective was to evaluate the burden of tinea pedis in underrepresented groups in the United States, utilising the novel A…	2023	10.1111/myc.13522	Article	English	0	Moseley I., Ragi S.D., Ouellette S., Rao B.	Scopus/Web of Science/PubMed
15	Two Feet-One Hand Syndrome: Tinea Pedis and Tinea Manuum	Purpose of Review: We performed a systematic review of literature from the PubMed database on January 1, 2019, to July 31, 2022. The search criteria were “(tinea manuum OR tinea pedis) AND “two feet-one hand syndrome,” with full text available and English or Spanish language required. This review will focus on the available data supporting the epidemiology, clinical manifestations, diagnosis, and…	2022	10.1007/s12281-022-00447-9	Review	English	0	Ugalde-Trejo N.X., Delgado Moreno K.P., Alfaro-Sánchez A., Tirado-Sánchez A., Bonifaz Trujillo J.A.	Scopus/Web of Science
16	Loop-mediated isothermal amplification-microfluidic chip for the detection of Trichophyton infection	Trichophyton is the most pathogenic type of fungal skin infection. It often invades and grows in a keratin-rich matrix, and lesions include human skin, hair, and fingernails (toenails). We designed LAMP primers for Trichophyton and developed a LAMP-Microfluidic chip detection system for Trichophyton. This system detects six common species of Trichophyton in the genus Trichophyton, including Trich…	2022	10.3389/fmicb.2022.1031388	Article	English	0	Jiang W., Hu D., Xu Y., Chen Y., Zhu X., Han Z., Ye X., Li X.	Scopus/Web of Science/PubMed
17	Development and characterization of itraconazole non-aqueous creams for the treatment of topical fungal infections	Itraconazole is a broad-spectrum triazole antifungal agent used to prevent and treat fungal infections. Itraconazole is commercially available as an oral and intravenous formulation; however, its administration via these routes is associated with various side effects, such as hepatotoxicity, peripheral neuropathy, cardiac dysrhythmia, and hearing loss. The objective of the current study was to pr…	2022	10.1016/j.jddst.2022.103818	Article	English	2	Kolimi P., Youssef A.A.A., Narala S., Nyavanandi D., Dudhipala N., Bandari S., Repka M.A.	Scopus/Web of Science
18	Clinico-laboratory findings of Malassezia folliculitis in Indonesia: A multicentre study	Background: Malassezia folliculitis (MF) is a humid-favoured fungal skin disease caused by Malassezia species. Inaccurate treatments, changes in skin flora and disease exacerbation are often occurred due to oversights in the diagnosis. Several diagnostic methods are established for MF. Objective: To identify clinico-laboratory findings of Malassezia folliculitis in Indonesia. Methods: The study w…	2022	10.1111/myc.13511	Article	English	1	Niode N.J., Suling P.L., Adji A., Miranda E., Bramono K., Astari L., Ervianti E., Sondakh O.R.L., Rusmawardiana, Yenny S.W., Widasmara D., Lubis F.M., Widaty S.	Scopus/Web of Science/PubMed
19	Dysbiosis of skin microbiota with increased fungal diversity is associated with severity of disease in atopic dermatitis	Background: Atopic dermatitis (AD) is a multifactorial inflammatory skin disease and an altered skin microbiota with an increase of Staphylococcus aureus has been reported. However, the role of fungi remains poorly investigated. Objectives: We aimed to improve the understanding of the fungal skin microbiota, the mycobiota, in AD in relation to the bacterial colonization. Methods: Skin swabs of 16…	2022	10.1111/jdv.18347	Article	English	5	Schmid B., Künstner A., Fähnrich A., Bersuch E., Schmid-Grendelmeier P., Busch H., Glatz M., Bosshard P.P.	Scopus/Web of Science/PubMed
20	Preparation of 10-undecenoic acid based polyurethane/PCL fibers by electrospinning method and investigation of their antifungal properties	Nowadays, in the treatment of such fungal infections, antifungal drugs in various forms are one of the most preferred methods. These medications can be in the form of creams and lotions, shampoos, pills, suppositories, powders, or sprays. The dose of the drugs is adjusted according to the type and growth area of the fungus, the severity of the symptoms, and the medical history of the patients. Dr…	2022	10.1007/s00289-022-04322-y	Article	English	1	Açarı İ.K., Boran F., Kolak S., Tatlıcı E., Yeşilada Ö., Köytepe S., Ateş B.	Scopus/Web of Science
21	Fungal Flora in Asymptomatic Pet Guinea Pigs and Rabbits	Fungal skin diseases are well-recognized diseases with public health implications. The study provides a comprehensive overview and aims to determine the rate of positive fungal cultures to identify the most common fungal species in guinea pigs and rabbits and to determine the rate of asymptomatic carriers in healthy pet animals. This knowledge is essential for understanding disease transmission d…	2022	10.3390/ani12182387	Article	English	0	Kottferová L., Molnár L., Čonková E., Major P., Sesztáková E., Szarková A., Slivková M., Kottferová J.	Scopus/Web of Science/PubMed
22	Prevalence and burden of skin diseases among the elderly in Singapore: a 15-year clinical cohort study	Background: Populations around the world are rapidly ageing. The profile of skin diseases in the elderly is likely to present unique demands on the healthcare system. Objectives: To provide current data on the burden of skin diseases in Singaporean patients and identify differences in the pattern of skin diseases between elderly patients and the rest of the population. Methods: This was a retrosp…	2022	10.1111/jdv.18205	Article	English	1	Yew Y.W., Kuan A.H.Y., George P.P., Zhao X., Tan S.H.	Scopus/Web of Science/PubMed
23	Emerging Trends in the Use of Topical Antifungal-Corticosteroid Combinations	A broad range of topical antifungal formulations containing miconazole or terbinafine as actives are commonly used as efficacious choices for combating fungal skin infections. Their many benefits, owing to their specific mechanism of action, include their ability to target the site of infection, enhance treatment efficacy and reduce the risk of systemic side effects. Their proven efficacy, and po…	2022	10.3390/jof8080812	Review	English	0	Mijaljica D., Spada F., Harrison I.P.	Scopus/Web of Science/PubMed
24	Tinea Gladiatorum: Epidemiology, Clinical Aspects, and Management	Tinea gladiatorum (TG) is a fungal skin infection that occurs among wrestlers and other contact sport athletes with a varied prevalence rate. The most common causative factor responsible as well for local outbreaks of the infection is an anthropophilic dermatophyte species—Trichophyton tonsurans (T. tonsurans). The purpose of this study was to gather current data about TG, including epidemiology,…	2022	10.3390/jcm11144066	Review	English	1	Zalewski A., Goldust M., Szepietowski J.C.	Scopus/Web of Science/PubMed
25	Prevalence of most common skin diseases in Europe: a population-based study	Background: The assessment of the prevalence of diseases is of primary importance in planning health policies. No complete data on the prevalence of skin diseases across European countries are available. Objective: To estimate the prevalence of the most frequent skin conditions or diseases in 27 European countries (24 EU countries, plus Norway, Switzerland, and the United Kingdom). Methods: We co…	2022	10.1111/jdv.18050	Article	English	12	Richard M.A., Paul C., Nijsten T., Gisondi P., Salavastru C., Taieb C., Trakatelli M., Puig L., Stratigos A., EADV burden of skin diseases project team	Scopus/Web of Science/PubMed
26	Epidemiology of dermatomycoses and onychomycoses in Ireland (2001–2020): A single-institution review	Background: Fungal skin infections are recognised as one of the most common health disorders globally, and dermatophyte infections of the skin, hair and nails are the most common fungal infections. Dermatophytes can be classified as anthropophilic, zoophilic or geophilic species based on their primary habitat association, and this classification makes epidemiological analysis useful for the preve…	2022	10.1111/myc.13473	Article	English	4	Powell J., Porter E., Field S., O'Connell N.H., Carty K., Dunne C.P.	Scopus/Web of Science/PubMed
27	Direct microscopy in the dermatology clinic: enhancing the management of skin infections and infestations	Direct microscopy is a valuable skill in the management of skin infections and infestations, yet it is underutilized in dermatology clinics. This review details its use in identifying fungal skin infections and scabies infestations, outlining the steps involved in sample collection, preparation and interpretation. © 2022 The Authors. Clinical and Experimental Dermatology published by John Wiley &…	2022	10.1111/ced.15118	Review	English	0	Chandler D.	Scopus/Web of Science/PubMed
28	Miconazole Nitrate–Loaded Solid Lipid Nanoparticle-Based Hydrogel Ameliorate Candida albicans Induced Mycoses in Experimental Animals	Solid lipid nanoparticles (SLN) encapsulating miconazole nitrate (MCN), with topical administration purposes for effective treatment of fungal skin infections, were formulated by a method that avoids the use of sonication or organic solvents. To facilitate the controlled release and skin targeting potential, the optimized SLN were incorporated into Carbopol hydrogels and characterized for physica…	2022	10.1007/s12668-022-00948-4	Article	English	2	Singh A.K., Mukerjee A., Pandey H., Mishra S.B.	Scopus/Web of Science
29	Clinical Characteristics, Quality of Life, and Risk Factors of Amputation Stump Skin Disease and Stump Fungal Infection in Adult Amputees in Shanghai, China	Introduction: The stump site of amputees is clinically vulnerable and prone to various skin diseases. Data regarding the impact on quality of life (QoL) of amputees with amputation stump skin disease (ASSD) and risk factors of ASSD and stump fungal infection in the Shanghai area are yet unknown. Objective: This study aims to evaluate the QoL of amputees with ASSD and explore the risk factors of A…	2022	10.3389/fmicb.2022.868431	Article	English	0	Li Y., He L., Lu X., Du Q., Yu S., Huang X.	Scopus/Web of Science/PubMed
30	Multiple Hybridization Events Punctuate the Evolutionary Trajectory of Malassezia furfur	Malassezia species are important fungal skin commensals and are part of the normal microbiota of humans and other animals. However, under certain circumstances these fungi can also display a pathogenic behavior. For example, Malassezia furfur is a common commensal of human skin and yet is often responsible for skin disorders but also systemic infections. Comparative genomics analysis of M. furfur…	2022	10.1128/mbio.03853-21	Article	English	1	Theelen B., Mixão V., Ianiri G., Goh J.P.Z., Dijksterhuis J., Heitman J., Dawson T.L., Gabaldón T., Boekhout T.	Scopus/Web of Science/PubMed
31	Recent concepts in fungal involvement in skin and soft tissue infections	As the at-risk population expands and new antifungal resistance patterns develop, it is critical to understand and recognize cutaneous manifestations of old and emerging fungal diseases.Purpose of reviewThe aim of this review is to provide an overview of the most frequent and emerging deep cutaneous fungal infections following either primary inoculation or secondary spread after haematogenous see…	2022	10.1097/qco.0000000000000806	Review	English	2	Peghin M., Ruiz-Camps I.	Scopus/Web of Science/PubMed
32	Naturally grown mycelium-composite as sustainable building insulation materials	A novel naturally grown mycelium-composite insulation brick was bio-produced by cultivating a biocompatible and fast-growing fungus, Pleurotus ostreatus, in the rye berries feedstocks. The resultant mycelium composites consisted of a core of colonized substrate, encased by a layer of water-repellent fungal skin. The microstructure of mycelium composites shows that fungal fibers grow from feedstoc…	2022	10.1016/j.jclepro.2022.130784	Article	English	12	Zhang X., Hu J., Fan X., Yu X.	Scopus/Web of Science
33	Repurposing ciclopirox for treating multiple forms of cancer: New reports and approaches	Ciclopirox is an anti-mycotic drug, used topically, that belongs to the hydroxypyridone molecular class and is not linked to azole drugs or other anti-fungal medication. Ciclopirox was first designed to treat vaginal candidiasis and fungal skin infections, and it is now widely used for these conditions. Drug repurposing is a method for discovering new applications for authorized or experimental m…	2022	10.55522/jmpas.v11i2.2545	Article	English	0	Deokar S.S., Shaikh K.S., Chaudhari P.D., Deokar S.S.	Scopus
34	The use of prescriptions for antibiotics and antifungals in Danish blood donors with dry skin	[No abstract available]	2022	10.1111/jocd.14207	Letter	English	1	Henning M.A.S., Andersen P.L., Ibler K.S., Ullum H., Erikstrup C., Nielsen K.R., Bruun M.T., Rigas A.S., Dinh K.M., Rostgaard K., Saunte D.M.L., Pedersen O.B., Jemec G.B.	Scopus
35	Transcriptome analysis of Lentinula edodes during brown mycelium-film formation [香菇菌丝后熟转色的转录组分析]	Lentinula edodes ranks the second among cultivated edible mushrooms in the world. The formation of brown film (BF) on the mycelial tissue surface is a feature of sawdust cultivation for L. edodes, and this process is critical for ensuring high quantity and quality of fruiting body formation. To understand the molecular mechanisms underlying this process in L. edodes, the high-throughput Illumina …	2022	10.13346/j.mycosystema.210250	Article	Chinese	0	Chu T., Shang J., Guan W., Yang R., Bao D., Tang L.	Scopus
36	An ancient haplotype containing antimicrobial peptide gene variants is associated with severe fungal skin disease in Persian cats	Dermatophytosis, also known as ringworm, is a contagious fungal skin disease affecting humans and animals worldwide. Persian cats exhibit severe forms of the disease more commonly than other breeds of cat, including other long-haired breeds. Certain types of severe dermatophytosis in humans are reportedly caused by monogenic inborn errors of immunity. The goal of this study was to identify geneti…	2022	10.1371/journal.pgen.1010062	Article	English	1	Myers A.N., Lawhon S.D., Diesel A.B., Bradley C.W., Hoffmann A.R., Murphy W.J., 99 Lives Cat Genome Consortium	Scopus/Web of Science/PubMed
37	Tinea Imbricata among the Indigenous Communities: Current Global Epidemiology and Research Gaps Associated with Host Genetics and Skin Microbiota	Tinea imbricata is a unique fungal skin disease that mostly affects indigenous populations in Southeast Asia, Oceania, and Central and South America. The control and management of this disease among these communities are challenging given their remote locations, certain traditional practices, and severe malnutrition status. To date, there are only a handful of reports published globally, which hi…	2022	10.3390/jof8020202	Review	English	0	Er Y.X., Lee S.C., Than L.T.-L., Muslim A., Leong K.F., Kwan Z., Sayed I.M., Lim Y.A.-L.	Scopus/Web of Science/PubMed
38	Amelanotic Melanoma Treated as Fungal Infection for Years	This study describes a case of amelanotic lentigo maligna melanoma in a 69-year-old female that had been growing for approximately 5 years. The asymptomatic lesion had been previously diagnosed and treated as a fungal skin infection, an inflammatory rash, and an actinic keratosis that did not respond to standard treatments. Biopsy revealed confluent and nested atypical melanocytes at the dermal-e…	2022	10.1155/2022/2598965	Article	English	0	Kuceki G., Deacon D.C., Secrest A.M.	Scopus/PubMed
39	Preparation and optimization of medicated cold cream using Caralluma adscendens var. attenuata for the treatment of Candida skin infection	Fungal skin infection is a major skin health issue worldwide. For the treatment of fungal infections, systematic antifungal therapies are frequently prescribed. The aim of this study is to prepare an antifungal cold cream from Caralluma adscendens var. attenuata to treat deep dermal fungal infection in the skin layer. To achieve this, different concentrations of plant extract-based cold cream wer…	2022	10.5114/bta.2022.118668	Article	English	0	Sundar M., Suresh S., Lingakumar K.	Scopus/PubMed
40	Risk of fetal malformation, spontaneous abortion, and adverse pregnancy outcomes after gestational terbinafine exposure: a systematic review	Fungal skin and nail infections are common health issues affecting an estimated 10%–20% of the world’s population. The antifungal agent terbinafine shows broad-spectrum activity against a wide range of fungal species and is commonly prescribed as a first-line treatment for dermatomycoses and onychomycoses. However, owing to insufficient data regarding embryotoxicity and adverse pregnancy outcomes…	2022	10.1080/09546634.2022.2110837	Review	English	0	Foessleitner P., Farr A., Deinsberger J.	Scopus/Web of Science/PubMed
41	Causal relationship between allergy and seborrheic dermatitis [Аллергия и себорейный дерматит – причинно-следственная взаимосвязь]	Seborrheic dermatitis is a chronic relapsing inflammatory skin disease associated with overproduction of sebum and activation of the fungal skin microbiota characterized by the presence of erythematous pruritic patches and plaques with greasy scales in areas rich in sebaceous glands. Aim. To study the spectrum of sensitization to food, pollen, and indoor and fungal allergens in patients with sebo…	2022	10.20538/1682-0363-2022-2-13-18	Article	English	0	Barilo A.A., Smirnova S.V.	Scopus/Web of Science
42	Factors Influencing Bacterial and Fungal Skin Communities of Montane Salamanders of Central Mexico	Host microbial communities are increasingly seen as an important component of host health. In amphibians, the first land vertebrates that are threatened by a fungal skin disease globally, our understanding of the factors influencing the microbiome of amphibian skin remains incomplete because recent studies have focused almost exclusively on bacteria, and little information exists on fungal commun…	2022	10.1007/s00248-022-02049-x	Article	English	3	García-Sánchez J.C., Arredondo-Centeno J., Segovia-Ramírez M.G., Tenorio Olvera A.M., Parra-Olea G., Vredenburg V.T., Rovito S.M.	Scopus/Web of Science/PubMed
43	Identifying novel drugs with new modes of action for neglected tropical fungal skin diseases (fungal skinNTDs) using an Open Source Drug discovery approach	Introduction: The three fungal skin neglected tropical diseases (NTD)–mycetoma, chromoblastomycosis and sporotrichosis–currently lack prioritization and support to establish drug discovery programs in search for novel treatment options. This has made the efforts to identify novel drugs for these fragmented skinNTDs. Areas covered: To help escalate the discovery of novel drugs to treat these funga…	2022	10.1080/17460441.2022.2080195	Review	English	2	Lim W., Verbon A., van de Sande W.	Scopus/Web of Science/PubMed
44	Longitudinal Characterization of the Fungal Skin Microbiota in Healthy Subjects Over a Period of 1 Year	Beneficial microorganisms on the skin contribute to the first line of defense against attacking pathogens. However, instability of the skin microbiota is associated with skin diseases. Hence, temporal analyses are crucial because they serve as a baseline to understand the development of dysbiosis in disease. In this study, we aim to improve the understanding of the fungal skin microbiota, the myc…	2022	10.1016/j.jid.2022.03.014	Article	English	0	Schmid B., Künstner A., Fähnrich A., Busch H., Glatz M., Bosshard P.P.	Scopus/Web of Science/PubMed
45	Formulation and Evaluation of In-vitro Antifungal Activity of Lemongrass and Citronella Oil against Selected Fungal Skin Infections	The essential oil collected from Cymbopogon flexuosus (Lemongrass) and Cymbopogon winterianus (Citronella) exhibited strong inhibition against all the selected fungi, evaluated in this study. Formulation of lemongrass and basil exhibited especially strong synergistic inhibition against Trichophyton tonsurons and Microsporum canis. In conclusion, we suggest the formulation of lemongrass and basil …	2022	10.25258/ijddt.12.1.66	Article	English	0	Kumar A., Patel R.	Scopus
46	The Developmental Toxicity of Thymus schimperi Essential Oil in Rat Embryos and Fetuses	Background. In Ethiopian traditional medicine, the aerial parts of Thymus schimperi are widely used to treat diseases such as gonorrhea, cough, liver disease, kidney disease, hypertension, stomach pain, and fungal skin infections. In addition, they have been used as vegetables to flavor a broad variety of food products. However, there is an insufficient investigation of the toxic effect of Thymus…	2022	10.1155/2022/4091839	Article	English	3	Adane F., Asres K., Ergete W., Woldekidan S., Seyoum G.	Scopus/Web of Science/PubMed
47	Anti-dermatophyte activity of the aqueous extracts of Thai medicinal plants [Atividade antidermatófita dos extratos aquosos de plantas medicinais tailandesas]	Medicinal plants have long been prescribed in Thailand for centuries. Different constituents of extracts have been used for treating of various infectious diseases. However, there is even less information available regarding the use in fungal skin infection. In order to assess traditional Thai claims about the therapeutic potential, this study is focused on exploring the anti-dermatophyte propert…	2022	10.1590/1519-6984.254291	Article	English	1	Chaiwaree S., Pongpaibul Y., Thammasit P.	Scopus/PubMed
48	Diagnostic and treatment protocol for fungal skin infections [Protocolo diagnóstico y terapéutico de las infecciones fúngicas de la piel]	Superficial fungal infections are extremely common in our setting, especially dermatophytosis, candidiasis, and pityriasis versicolor. Their clinical presentations vary and it is advisable to be familiarized with them in order to make a correct differential diagnosis. The fundamental pillars for diagnosis are the combination of clinical data, use of the Wood lamp, a direct examination, and a cult…	2022	10.1016/j.med.2022.01.007	Article	English; Spanish	0	Suárez-Valle A., Domínguez-Santás M., Guimaraens B.D., González M.M.M.	Scopus
49	Antibacterial properties of zinc oxide nanoparticles on Pseudomonas aeruginosa (ATCC 27853)	The application of nanotechnology has brought about advancements in environmental and medical applications. Recently, zinc oxide nanoparticle (ZnO NP) is commonly used to treat a wide range of bacterial and fungal skin infections due to its antimicrobial property. This investigation was intended to study the antimicrobial effect of ZnO NP on Pseudomonas aeruginosa by testing the bacterial inhibit…	2022	10.24200/sci.2021.56815.4974	Article	English	5	Dhanasegaran K., Djearamane S., Liang S.X.T., Wong L.S., Kasivelu G., Lee P.F., Lim Y.M.	Scopus/Web of Science
50	Conventional and molecular diagnostics for detection of causative fungi in clinical samples of human dermatomycosis	Background Dermatomycosis affects millions of people worldwide; the availability of data on the prevalence of superficial fungal infections and some associated epidemiological factors in our region is little. Objective To compare conventional and molecular methods to characterize some fungal species causing human mycotic infection. Patients and methods The present cross-sectional study of fungal …	2022	10.4103/jewd.jewd_38_21	Article	English	1	Tawfik K.M., Mohammed R.R., Sobhy A., Shaltout A.S.	Scopus/Web of Science
51	Host-Microbe Interaction on the Skin and Its Role in the Pathogenesis and Treatment of Atopic Dermatitis	Atopic dermatitis (AD) is a condition with a complex and unclear aetiology. Possible causes of AD encompass alterations in the structure and function of the epidermal barrier, disturbances in the skin microbiome, immune factors, allergens, bacterial and fungal infections as well as environmental and genetic factors. In patients with AD, acute skin lesions are colonized by a greater number of bact…	2022	10.3390/pathogens11010071	Review	English	6	Nowicka D., Chilicka K., Dzieńdziora-Urbińska I.	Scopus/Web of Science/PubMed
52	An environmentally friendly fluorine-free sandwich coating based on a nonwoven fabric for efficient unidirectional water transport	Medical research reveals that keeping the skin surface dry can effectively prevent a variety of fungal skin diseases. Therefore, it is of great practical significance to develop a light, thin, comfortable and breathable functional garment fabric with efficient one-way water transmission for people's requirements. Here, we successfully prepared a three-layer stacking sandwich coating to construct …	2021	10.1039/d1cc05072a	Article	English	5	Zhang S., Li S., Zhang Z., Huang J., Lai Y., Feng Y., Qian X.	Scopus/Web of Science/PubMed
53	Current state and future prospects of pure mycelium materials	In the context of the ongoing transition from a linear to a circular economy, ecologically friendly renewable solutions are put in place. Filamentous fungi can be grown on various organic feedstocks and functionalized into a range of diverse material types which are biobased and thus more sustainable in terms of their production, use and recycling. Pure mycelium materials, consisting only of myce…	2021	10.1186/s40694-021-00128-1	Review	English	18	Vandelook S., Elsacker E., Van Wylick A., De Laet L., Peeters E.	Scopus/PubMed
54	Seasonal and gender variation in skin disease: A cross-sectional study of 3120 patients at Razi hospital	Objective: We aimed to determine the prevalence of different skin diseases and their seasonal variations at the Razi dermatology hospital from 2019 to 2020. Methods: In this cross-sectional study, we obtained data from the medical records of 3120 patients visiting the dermatology clinic of Razi hospital. The prevalence of skin diseases was evaluated using meteorologically defined seasons. We look…	2021	10.1016/j.ijwd.2021.09.014	Article	English	0	Khodaei B., Seyedpour S., Gholami B., Garmarudi G., Nasimi M.	Scopus/PubMed
55	Common Antifungal Drugs in Pregnancy: Risks and Precautions	Fungal skin infections are on the rise in India, and pregnant women are not immune to them. They are one of the commonest causes of secondary pruritus in pregnancy and can worsen the quality of life. Cutaneous dermatophytic infections have seen a recent emergence as a public health problem in India with increasing incidence as well as failure to appropriately respond to treatment. Vaginal candidi…	2021	10.1007/s13224-021-01586-8	Review	English	1	Patel M.A., Aliporewala V.M., Patel D.A.	Scopus/Web of Science/PubMed
56	Development and characterization of Novel topical oil/PEG creams of voriconazole for the treatment of fungal infections	Voriconazole (VRC), a second generation triazole derivative emerged as a promising candidate for the treatment of fungal infections. Voriconazole is commercially available as oral and intravenous formulations, however administration through these routes is associated with several side effects like hepatotoxicity, photopsia and abdominal pain. Hence, percutaneous delivery of voriconazole through c…	2021	10.1016/j.jddst.2021.102928	Article	English	8	Shettar A., Shankar V.K., Ajjarapu S., Kulkarni V.I., Repka M.A., Murthy S.N.	Scopus/Web of Science
57	Characterization and Physical Properties of Mycelium Films Obtained from Wild Fungi: Natural Materials for Potential Biotechnological Applications	Fresh basidiomes of species belonging to the genera Aurantiporus, Ganoderma, Lentinus, and Panus species were collected from a cloud forest patch located in a natural protected area. Tissue portions of the fresh basidiomes were excised and grown in axenic culture with potato dextrose medium at 27 °C obtaining six strains. Additionally, a commercial strain of Pleurotus ostreatus was included for c…	2021	10.1007/s10924-021-02178-3	Article	English	5	César E., Canche-Escamilla G., Montoya L., Ramos A., Duarte-Aranda S., Bandala V.M.	Scopus/Web of Science
58	Flexible Fungal Materials: Shaping the Future	Fungi are a revolutionary, smart, and sustainable manufacturing platform that can be used to upcycle byproducts and wastes into flexible fungal materials (FFMs) such as chitin- and β-glucan-based foams, paper, and textiles. With highly adaptable manufacturing pathways, the efficiency and properties of these materials depend on the biomass source and fermentation method. Liquid substrates provide …	2021	10.1016/j.tibtech.2021.03.002	Review	English	22	Gandia A., van den Brandhof J.G., Appels F.V.W., Jones M.P.	Scopus/Web of Science/PubMed
59	Fungal sensing skin	Background: A fungal skin is a thin flexible sheet of a living homogeneous mycelium made by a filamentous fungus. The skin could be used in future living architectures of adaptive buildings and as a sensing living skin for soft self-growing/adaptive robots. Results: In experimental laboratory studies we demonstrate that the fungal skin is capable for recognising mechanical and optical stimulation…	2021	10.1186/s40694-021-00110-x	Retracted	English	6	Adamatzky A., Gandia A., Chiolerio A.	Scopus/PubMed
60	Investigation of skin microbiota reveals Mycobacterium ulcerans-Aspergillus sp. trans-kingdom communication	Mycobacterium ulcerans secrete a series of non-ribosomal-encoded toxins known as mycolactones that are responsible for causing a disabling ulceration of the skin and subcutaneous tissues named Buruli ulcer. The disease is the sole non-contagion among the three most common mycobacterial diseases in humans. Direct contact with contaminated wetlands is a risk factor for Buruli ulcer, responsible for…	2021	10.1038/s41598-021-83236-7	Article	English	3	Hammoudi N., Cassagne C., Million M., Ranque S., Kabore O., Drancourt M., Zingue D., Bouam A.	Scopus/Web of Science/PubMed
61	Fungal Infections among Teledermatology Consultations in Dermatology Department of a Tertiary Care Hospital: A Descriptive Cross-sectional Study	Introduction: Teledermatology provides virtual consultation to patients using telecommunication technology. Using this method dermatologists can diagnose a condition with the help of pictures of the lesions and short history. During the COVID-19 pandemic, practicing this method has become more relevant. Providing teleconsultations to patients with fungal skin infections can prevent inadvertent us…	2021	10.31729/jnma.5900	Article	English	0	Jha S.M., Dangol A.K.S., Suwal B., Yadav J.	Scopus/Web of Science/PubMed
62	The influence of tea tree oil on antifungal activity and pharmaceutical characteristics of pluronic®F‐127 gel formulations with Ketoconazole	Fungal skin infections are currently a major clinical problem due to their increased occurrence and drug resistance. The treatment of fungal skin infections is based on monotherapy or polytherapy using the synergy of the therapeutic substances. Tea tree oil (TTO) may be a valuable addition to the traditional antifungal drugs due to its antifungal and anti‐inflammatory activity. Ketoconazole (KTZ)…	2021	10.3390/ijms222111326	Article	English	5	Wróblewska M., Szymańska E., Winnicka K.	Scopus/Web of Science/PubMed
63	Factors Associated with Stunted Growth in Children Under Five Years in Antananarivo, Madagascar and Bangui, Central African Republic	Objectives: With a fourth of all under-five children affected, stunting remains one of the biggest health challenges worldwide. Even though the main underlying factors are known, the exact pathways to stunting varying in affected regions, and interventions thus need to be tailored to the local contexts. This study aimed assessing and comparing factors associated with stunting in two understudied …	2021	10.1007/s10995-021-03201-8	Article	English	6	Vonaesch P., Djorie S.G., Kandou K.J.E., Rakotondrainipiana M., Schaeffer L., Andriatsalama P.V., Randriamparany R., Gondje B.P., Nigatoloum S., Vondo S.S., Etienne A., Robinson A., Hunald F.A., Raharimalala L., Giles-Vernick T., Tondeur L., Randrianirina F., Bastaraud A., Gody J.-C., Sansonetti P.J., Randremanana R.V., Barbot-Trystram L., Barouki R., Collard J.-M., Doria M., Godje B.P., Kapel N.…	Scopus/Web of Science/PubMed
64	Tinea pedis—An embarrassing problem for health and beauty—A narrative review	Fungal infections present with a broad spectrum of diseases in humans (from relatively mild superficial infections of the skin and mucous membranes to the invasive or chronic infections of internal organs, which have a high mortality rate). Globally, up to 1.6 million people die each year as a result of various types of mycoses. Currently, many scientific studies focus on the best possible unders…	2021	10.1111/myc.13340	Review	English	6	Nowicka D., Nawrot U.	Scopus/Web of Science/PubMed
65	Does South Africa hold the key to the development of alternative treatments for resistant dermatophyte infections? A review	Background: Dermatophyte infections are becoming increasingly prevalent in humans. Limited availability of antifungal agents and the increasing number of treatment failures have motivated research for therapeutic alternatives, which can be developed as potential antifungal agents. Medicinal plant extracts have been proposed as alternative treatments and scientists are seeking medicinal plant spec…	2021	10.1016/j.hermed.2021.100474	Review	English	1	Ndlovu B., Africa C., Klaasen J., Rahiman F.	Scopus/Web of Science
66	Prevention and treatment of fungal skin infections using cationic polymeric films	Dermatophytosis is a fungal infection of skin, nails and hair. Treatments can be long and infections are often recurrent, and novel treatments are desirable. Here we tested the use of polymeric films that can be sprayed on the skin for the prevention and treatment of dermatophytosis. The two polymers selected were ABIL T Quat 60 and Eudragit E100, which were tested ex vivo using a porcine skin mo…	2021	10.3390/pharmaceutics13081161	Article	English	0	Ho F.K.-H., Bolhuis A., Delgado-Charro M.B.	Scopus/Web of Science/PubMed
67	Genetic predisposition to mucocutaneous fungal infections [Prédisposition génétique aux infections fongiques cutanéomuqueuses]	Mucocutaneous fungal infections are common and usually occur in the presence of certain risk factors. However, these infections can occur in patients with no known risk factors. This indicates the presence of an underlying genetic susceptibility to fungi reflecting an innate or adaptive immune deficiency. In this review, we highlight genetic factors that predispose to mucocutaneous fungal infecti…	2021	10.1016/j.revmed.2021.05.009	Short Survey	English; French	0	Baghad B., Bousfiha A.A., Chiheb S., Ailal F.	Scopus/Web of Science/PubMed
68	STAT3 Hyper-IgE Syndrome—an Update and Unanswered Questions	The hyper-IgE syndromes (HIES) are a heterogeneous group of inborn errors of immunity sharing manifestations including increased infection susceptibility, eczema, and raised serum IgE. Since the prototypical HIES description 55 years ago, areas of significant progress have included description of key disease-causing genes and differentiation into clinically distinct entities. The first two patien…	2021	10.1007/s10875-021-01051-1	Review	English	33	Tsilifis C., Freeman A.F., Gennery A.R.	Scopus/Web of Science/PubMed
69	PERFORMANCE RESULTS of the IMPROVED WORKING CLASSIFICATION of SUPERFICIAL MYCOSES of the SKIN in CARRYING out THEIR CLINICAL and EPIDEMIOLOGICAL MONITORING [Результати апробації вдосконаленої робочої класифікації поверхневих мікозів шкіри при проведенні їх клініко-епідеміологічного моніторингу.]	The results of testing of the improved working classification of superficial mycoses of the skin and its appendages (SMS) in the Republic of Azerbaijan for the period of 2012-2016 are presented. Given the variety of classifications of fungal skin diseases, many years of clinical experience have shown that none of them fully meets the requirements of a practicing physician. The author has develope…	2021	10.26641/2307-0404.2021.2.234726	Article	English	0	Akhmedova S.	Scopus/Web of Science
70	A quality improvement approach to perineal skin care using standardized guidelines and novel diaper wipes to reduce diaper dermatitis in nicu infants	Background: Diaper dermatitis (DD) causes discomfort and emotional distress and creates possible sources of infection among newborn intensive care unit infants. Diaper dermatitis remains prevalent despite studies documenting an understanding of prevention and treatment modalities. Standardizing perineal skin care guidelines could reduce DD. Purpose: Implement perineal skin care guidelines, while …	2021	10.1097/anc.0000000000000795	Article	English	2	Rogers S., Thomas M., Chan B., Hinckley S.K., Henderson C.	Scopus/Web of Science/PubMed
71	Formulation and in vitro evaluation of topical nanosponge-based gel containing butenafine for the treatment of fungal skin infection	In the current study, four formulae (BNS1-BNS4) of butenafine (BTF) loaded nanosponges (NS) were fabricated by solvent emulsification technology, using different concentration of ethyl cellulose (EC) and polyvinyl alcohol (PVA) as a rate retarding polymer and surfactant, respectively. Prepared NS were characterized for particle size (PS), polydispersity index (PDI), zeta potential (ZP), entrapmen…	2021	10.1016/j.jsps.2021.04.010	Article	English	23	Ahmed M.M., Fatima F., Anwer M.K., Ibnouf E.O., Kalam M.A., Alshamsan A., Aldawsari M.F., Alalaiwe A., Ansari M.J.	Scopus/Web of Science/PubMed
72	Investigation of alternative therapeutic and biocidal options to combat antifungal-resistant zoonotic fungal pathogens isolated from companion animals	Fungal skin infections and iatrogenic disease of companion animals continue to be an ongoing issue for veterinarians, where misdiagnosis or inapt medical treatment result in secondary conditions within animals. The widespread use of antifungals in both modern medicine and agriculture has resulted in concomitant resistance in species, where zoonotic transfer poses a risk to public health. Studies …	2021	10.3390/idr13020034	Article	English	3	Meade E., Savage M., Slattery M., Garvey M.	Scopus/Web of Science/PubMed
73	Lipid based nanocarriers: A novel paradigm for topical antifungal therapy	Superficial fungal infections manifesting the skin have become prevalent today. Even though there has been a substantial number of antifungal drugs approved for treating topical fungal infections, they pose certain pitfalls relating to their physicochemical properties. Conventional delivery systems like creams, lotions, and gels are available for the delivery of these antifungal agents. However, …	2021	10.1016/j.jddst.2021.102397	Review	English	19	Nene S., Shah S., Rangaraj N., Mehra N.K., Singh P.K., Srivastava S.	Scopus/Web of Science
74	Time in the Laboratory, but Not Exposure to a Chytrid Fungus, Results in Rapid Change in Spring Peeper (Pseudacris crucifer) Skin Bacterial Communities	Interactions between pathogens and the symbiotic microbial communities that reside in hosts can impact disease processes. Symbiotic microbial communities can act to prevent pathogen infection in some instances, while in other instances, pathogens can disrupt these symbiotic communities. We sought to address these interactions between the fungal skin pathogen Batrachochytrium dendrobatidis (Bd) an…	2021	10.1643/h2020077	Article	English	3	Jones K.R., Walke J.B., Becker M.H., Belden L.K., Hughey M.C.	Scopus/Web of Science
75	Standardization of resazurin use in susceptibility testing of natural products against yeasts in planktonic cells and in biofilms formation	Natural products, such as the ethanolic propolis extract (PE), have been shown to be a safe and effective therapeutic alternative for the treatment of fungal skin and nail diseases. However, the presence of the resin and the physicochemical characteristics of the extract sometimes difficult the reading and determination of breakpoints of the in vitro tests, evidencing the need for alternatives th…	2021	10.4025/actascibiolsci.v43i1.55700	Article	English	2	Barros I.L.E., Veiga F.F., Corrêa J.L., Jarros I.C., Negri M., Svidzinski T.I.E.	Scopus
76	The Global Burden of Skin and Subcutaneous Disease: A Longitudinal Analysis from the Global Burden of Disease Study From 1990-2017	Background: The global prevalence and disability of skin and subcutaneous diseases have grown annually in recent decades. Large-scale epidemiologic data is useful for better characterization of skin disease to create more impactful and sustainable interventions. Methods: We assessed multiple global trends in skin and subcutaneous disease from 1990 to 2017 in 195 countries worldwide through the la…	2021	10.25251/skin.5.2.7	Article	English	5	Giesey R.L., Mehrmal S., Uppal P., Delost G.R.	Scopus
77	The global, regional, and national burden of fungal skin diseases in 195 countries and territories: A cross-sectional analysis from the Global Burden of Disease Study 2017	Introduction: Fungal skin diseases are highly prevalent worldwide, but few existing studies focus on the burden of dermatomycoses. Methods: An analysis of fungal skin disease trends in 2017 in 195 countries worldwide was conducted using the Global Burden of Disease Study database, including prevalence rates, age and sex patterns, and fungal burden, using disability-adjusted life years (DALYs). Ag…	2021	10.1016/j.jdin.2020.10.003	Article	English	11	Urban K., Chu S., Scheufele C., Giesey R.L., Mehrmal S., Uppal P., Delost G.R.	Scopus/PubMed
78	Formulation and evaluation of novel herbal ointment for the treatment of fungal infection	Clove (Eugenia caryophyllus) and orange peel oil are most valuable spices that have been used for centuries for many medicinal purposes. It is effective in reducing fungal infection such as athlete’s foot. (a contagious fungal skin infection caused by a species of trichophyton or epidermorphyton (tinea pedis) that usually affects the foot). Pre formulation studies were done for antifungal activit…	2021	10.5958/0974-360x.2021.00325.5	Article	English	1	Muthukumar S., Noori Irfana Parvin M.K., Shobana S., Vimala N., Vinesha R., Sundaraganapathy R.	Scopus
79	Visualising the past to plan the future: a network analysis of the largest European dermatology conference	Background: The annual conference of the European Academy of Dermatology and Venereology is one the largest dermatology conferences worldwide. Objectives: Network analysis can be used for in-depth insight into trending topics and underlying trends at the congress. Materials & Methods: Network analysis was employed to assess the entirety of the submitted abstracts to the congress in 2019. The data…	2021	10.1684/ejd.2021.4010	Article	English	2	Kaczmarczyk R., King F., Tizek L., Biedermann T., Zink A.	Scopus/Web of Science/PubMed
80	Terbinafine Hydrochloride Combined With Itraconazole for Fungal Skin Diseases: A Randomized Controlled Trial	Background:Terbinafine and itraconazole are the common antifungal drugs in clinic. In vitro experiments proved that terbinafine combined with itraconazole achieves better antifungal effects. However, clinical study addressing this issue was still scarce.Study Question:Terbinafine combined with itraconazole achieves better therapeutic effects in fungal skin diseases.Study Design:Approximately 178 …	2021	10.1097/mjt.0000000000001075	Article	English	3	Zhang D., Liao W., Chen C., Lai H., Liu S.	Scopus/Web of Science/PubMed
81	An enhanced skin disease vitiligo and ringworm recognition android application using image analysis	Dermatophyte infections of the skin, hairs and nails are very common and variable in aspect. This research work reports the development of android application to identify the skin infections namely Vitiligo and Ringworm. The occurrence of Vitiligo skin disorder is primarily caused by the disappearance of pigment cells from the epidermis that gives rise to well define white patches which are often…	2021	10.1109/icicv50876.2021.9388425	Conference Paper	English	2	Awasekar D.	Scopus
82	Transdermal platform for the delivery of the antifungal drug naftifine hydrochloride based on porous vaterite particles	Development of a skin-targeted particulate delivery system providing an extended or sustained release of the payload and a localized therapeutic effect is one of the main challenges in the treatment of fungal skin infections. In the topical administration of antifungals, the drug should penetrate into the stratum corneum and lower layers of the skin in effective concentrations. Here, we introduce…	2021	10.1016/j.msec.2020.111428	Article	English	20	Gusliakova O., Verkhovskii R., Abalymov A., Lengert E., Kozlova A., Atkin V., Nechaeva O., Morrison A., Tuchin V., Svenskaya Y.	Scopus/Web of Science/PubMed
83	Applying conservation physiology in response to a devastating wildlife disease, white-nose syndrome in bats	White-nose syndrome (WNS) is a fungal skin disease that has killed millions of bats since its introduction to North America around 2007. Despite rapid and unprecedented mortality of multiple bat species from WNS, some bats suffer little to no impact. While a conservation physiology approach has allowed for tremendous progress connecting WNS pathophysiology with population impacts, a fundamental q…	2021	10.1093/oso/9780198843610.003.0009	Book Chapter	English	0	Dzal Y.A., Willis C.K.R.	Scopus
84	Testing and characterization of a biosensor for the detection of infections in tissue based on Rh6G and AuNP functionalized with BSA	In this study we present a microfluidic device as an electrochemical biosensor with a role for detecting fungal skin/tissue infections. This biosensor, made by colloidal aqueous solution of rhodamine Rh6G-gold nanoparticles (AuNP) functionalized with bovine serum albumin (BSA) with applications in selective detection and identification of infections in the human body.The interaction between the p…	2021	10.1109/cas52836.2021.9604167	Conference Paper	English	0	Draghiciu L., Parvulescu C., Craciun G., Voitincu C., Albu A., Romanitan C.	Scopus/Web of Science
85	Allergic and non-allergic skin diseases in children of Ukraine: a retrospective study of the prevalence and incidence over the past 24 years [АЛЕРГІЧНІ ТА НЕАЛЕРГІЧНІ ХВОРОБИ ШКІРИ В ДІТЕЙ УКРАЇНИ: РЕТРОСПЕКТИВНЕ ДОСЛІДЖЕННЯ ЗА ОСТАННІ 24 РОКИ]	Bacterial, allergic, parasitic and fungal skin lesions are much more common among children than among adult patients. The aim of this study was to analyze data on the prevalence and incidence of diseases of skin and subcutaneous tissue with allergic and non-allergic origin among children of Ukraine in period from 1994 to 2017. Our main purpose was to determine the possible impact of different adv…	2021	10.26641/2307-0404.2021.3.242265	Article	Ukrainian	4	Volosovets O.P., Bolbot Yu.K., Beketova G.V., Berezenko V.S., Umanets T.R., Rechkina O.O., Mіtiuriaeva-Korniyko I.O., Volosovets T.М., Pochinok T.V.	Scopus/Web of Science
86	Infiltrative-suppurative form of scalp microsporia in a child with generalized pustular psoriasis of von Zumbusch: Clinical case [Инфильтративно-нагноительная форма микроспории волосистой части головы у ребенка с генерализованным пустулезным псориазом типа Цумбуша: клинический случай]	Background. This article discusses issues of diagnosis and management of pustular psoriasis in a child associated with recurrent dermatomycosis, immunopathogenetic mechanisms of pustular psoriasis, its course and prognosis. Clinical Case Description. The clinical case of infiltrative-suppurative form of scalp microsporia in 11 years old child with long-term psoriasis vulgaris and its transformati…	2021	10.15690/vsp.v20i5.2316	Article	Russian	0	Bakulev A.L., Kravchenya S.S., Igonina I.A.	Scopus
87	Composition of the Essential Oil Thymus schimperi and Evaluation of Its Acute and Subacute Toxicity in Wistar Albino Rats: In Silico Toxicity Studies	Background. In Ethiopian traditional medicine, the aerial part of Thymus schimperi is widely used to treat diseases such as gonorrhea, cough, liver disease, kidney disease, hypertension, stomach pain, and fungal skin infections. However, there is insufficient investigation on the toxic effect of the essential oil of T. schimperi. The aim of this study was, therefore, to evaluate the acute, subacu…	2021	10.1155/2021/5521302	Article	English	6	Adane F., Asres K., Ergete W., Woldekidan S., Abebe A., Lengiso B., Seyoum G.	Scopus/Web of Science/PubMed
88	Epidemiological characteristics and risk factors of tinea pedis disease among adults attending tikrit teaching hospital/ iraq	Background: Tinea pedis is one of the most common skin infections of interdigital toe webspace as well as feet skin and may affect the nail or the hand. It is caused by dermophytes fungi especially Trichophyton species. Direct contact with a contaminated environment or animal is the main mode of transmission. Tinea pedis is more frequent among adults than children and more among those with the pr…	2021	10.2174/1871526520666200707114509	Article	English	0	Al-Mahmood A., Al-Sharifi E.	Scopus/PubMed
89	Quantitation of Ofloxacin, Tinidazole, Terbinafine Hydrochloride, and Clobetasol propionate in topical cream formulation by chromatographic methods	A combination of Ofloxacin, Tinidazole, Terbinafine hydrochloride, and Clobetasol propionate is used for treatment, control, prevention, and improvement of bacterial and fungal skin infections. Two chromatographic methods (HPLC and HPTLC) were developed for the quantitative determination of these four drugs in their combined topical formulation. The HPLC method employed a C18 (250 × 4.6 mm, 5 μ) …	2021	10.1080/10826076.2021.1930555	Article	English	3	Bodiwala K.B., Rana P.M., Patel N.T., Sureja D.K., Gajjar A.K.	Scopus/Web of Science
90	Epidemiology of dermatophytoses in paediatric population in Southwestern Poland, 2011–2016	Introduction: Dermatophytoses are the most common superficial fungal infections in paediatric population. Its pathogen pattern has changed over years. Aim: To analyse the spectrum of dermatophytoses in children living in Southwestern Poland, in the years 2011–2016. Material and methods: A total of 1705 patients were diagnosed with fungal skin infection in the Mycological Laboratory, Dermatology D…	2021	10.5114/ada.2021.104283	Review	English	0	Gawdzik A., Nowogrodzka K., Hryncewicz-Gwóźdź A., Szepietowski J., Maj J., Jankowska-Konsur A.	Scopus/Web of Science/PubMed
91	Diagnostic mistakes in dermatomycoses in children	At a dermatological appointment, fungal skin lesions are not uncommon. Zooanthroponic dermatomycoses among them account for approx-imately 15%. Microsporia and trichophytosis are more common in childhood. Zooanthroponic dermatoses are more common in the summer due to increased contact of children with animals in the summer during the holidays. In recent years, there have been some changes in the …	2021	10.17116/klinderma20212001198	Article	Russian	1	Zatorskaya N.F., Proskurina M.I., Grebenyuk V.N., Markova M.N., Bobrov M.A., Zhukova O.V.	Scopus
92	Is the antimicrobial activity of hydrolates lower than that of essential oils?	Among the top five human infections requiring medical treatment is dermatitis. Treatment of bacterial and fungal skin infections is usually based on antibiotic therapy, which is often ineffective due to the involvement of antibiotic-resistant microbial strains. The aim of this study was to compare the antimicrobial activity of essential oils (EOs) and hydrolates (Hys) extracted from six aromatic …	2021	10.3390/antibiotics10010088	Note	English	14	Di Vito M., Smolka A., Proto M.R., Barbanti L., Gelmini F., Napoli E., Bellardi M.G., Mattarelli P., Beretta G., Sanguinetti M., Bugli F.	Scopus/Web of Science/PubMed
93	Estimated burden of fungal infections in oman	For many years, fungi have emerged as significant and frequent opportunistic pathogens and nosocomial infections in many different populations at risk. Fungal infections include disease that varies from superficial to disseminated infections which are often fatal. No fungal disease is reportable in Oman. Many cases are admitted with underlying pathology, and fungal infection is often not document…	2021	10.3390/jof7010005	Article	English	2	Al-Hatmi A.M.S., Al-Shuhoumi M.A., Denning D.W.	Scopus/Web of Science/PubMed
94	Beyond Skin Tumors: A Systematic Review of Mohs Micrographic Surgery in the Treatment of Deep Cutaneous Fungal Infections	BACKGROUNDDeep cutaneous fungal infections (DCFIs) can cause significant morbidity in immunocompromised patients and often fail medical and standard surgical treatments because of significant subclinical extension. Although rarely considered in this setting, Mohs micrographic surgery (MMS) offers the advantages of comprehensive margin control and tissue conservation, which may be beneficial in th…	2021	10.1097/dss.0000000000002761	Review	English	2	Zargham H., Gabrielli S., Giordano C.N., Higgins H.W.	Scopus/Web of Science/PubMed
95	Analysis of Fungal Flora in the Dust of Bedding in Japanese Houses and Genetic Identification of Yeasts Isolated from the Dust	This study examined the fungal flora contained in the dust of bedding used in 50 houses in Japan. The result showed that the mycoflora having the largest isolation rate was yeasts, which were isolated by 42 out of 50 houses（84%）, and exceeded the isolation rate of Cladosporium spp.（80%）and Aspergillus spp.（66%）. In addition, the isolation rate of Alternaria, which was an important fungus causing …	2021	10.4265/bio.25.193	Article	English	7	Hashimoto K., Yamazaki F., Kohyama N., Kawakami Y.	Scopus/PubMed
96	Initial Evidence of Distinguishable Bacterial and Fungal Dysbiosis in the Skin of Patients with Atopic Dermatitis or Netherton Syndrome	Atopic dermatitis (AD) is an inflammatory skin disease in which epidermal barrier impairment, often owing to FLG null mutations, precedes immune hyperresponsiveness. Ichthyosis vulgaris is characterized by FLG null mutations and noninflamed dry skin. Netherton syndrome (NS), caused by SPINK5 null mutations, is characterized by generalized erythroderma with scaling and atopic manifestations. The g…	2021	10.1016/j.jid.2020.05.102	Article	English	16	Moosbrugger-Martinz V., Hackl H., Gruber R., Pilecky M., Knabl L., Orth-Höller D., Dubrac S.	Scopus/Web of Science/PubMed
97	In vitro biological activities of clove essential oil formulations against Microsporum gallinae ATCC 90749	Avian dermatophytosis is a disease caused by Microsporum gallinae. The disease can cause economic loss in farmed chickens. We investigated the antifungal activity of clove essential oil (CO) against M. gallinae ATCC 90749. The main components of CO were identified by GC-MS, eugenol (98.87%) and trans-caryophyllene (1.13%) were found. The antioxidant activity of CO was determined by DPPH assay, th…	2020	10.2306/scienceasia1513-1874.2020.067	Article	English	4	Aiemsaard J., Kamollerd C., Butudom P., Worawong K., Thongkham E.	Scopus/Web of Science
98	A skin disease and needs assessment analysis of the displaced Rohingya population in the Kutupalong refugee camp, Bangladesh	The physical, psychological and financial burden of skin disease in low- to middle-income countries, where access to skincare is limited, is poorly understood. A group that we know very little about in this regard are refugees. There are limited data on the range of skin diseases and skincare needs of this group. To better understand the skincare needs of the displaced Rohingya population residin…	2020	10.1111/ced.14310	Article	English	1	Khan S.S., Padovese V., Maurer T.A., Barua D.P., Chowdhury M.I.H., Islam M.A., Mowla M.R., Griffiths C.E.M.	Scopus/Web of Science/PubMed
99	Fungal mycelium classified in different material families based on glycerol treatment	Fungal mycelium is an emerging bio-based material. Here, mycelium films are produced from liquid shaken cultures that have a Young’s modulus of 0.47 GPa, an ultimate tensile strength of 5.0 MPa and a strain at failure of 1.5%. Treating the mycelial films with 0–32% glycerol impacts the material properties. The largest effect is observed after treatment with 32% glycerol decreasing the Young’s mod…	2020	10.1038/s42003-020-1064-4	Article	English	23	Appels F.V.W., van den Brandhof J.G., Dijksterhuis J., de Kort G.W., Wösten H.A.B.	Scopus/Web of Science/PubMed
100	Enhanced topical econazole antifungal efficacy by amine-functionalized silica nanoparticles	The present study aims at developing efficient econazole (ECO) platforms as topical creams for the treatment of fungal skin infections. The hexagonal mesoporous silica nanoparticle, known as MCM41, was synthesized and functionalized by aminopropyl groups (MCM41-NH 2). Various ECO concentrations were loaded into MCM41 and MCM41-NH 2 (MSNs); the optimized complexes with the highest entrapment effic…	2020	10.1007/s12034-019-1974-2	Article	English	10	Montazeri M., Razzaghi-Abyaneh M., Nasrollahi S.A., Maibach H., Nafisi S.	Scopus/Web of Science
101	Occupational Trichophyton verrucosum infection in a cattle farmer [Berufliche Infektion mit Trichophyton verrucosum bei einem Rinderzüchter]	Ringworm in cattle may cause an occupational skin disease in humans. Trichophyton verrucosum lead to a highly inflammatory fungal skin infection that is often misdiagnosed as bacterial disease and consequently mistreated with antibiotics. To establish the correct diagnosis, it is necessary to collect skin scales; in addition, a skin biopsy can be helpful. Deep dermatophyte infections by Trichophy…	2020	10.1007/s00105-020-04655-7	Article	German	1	Schumny U., Wiegand C., Hipler U.-C., Darr-Foit S., Peckruhn M., Uhrlaß S., Nenoff P., Elsner P.	Scopus/Web of Science/PubMed
102	Skin disease detection and segmentation using dynamic graph cut algorithm and classification through Naive Bayes classifier	The largest organ and the outer covering of the human body is the skin. With seven layers of it covering the other organs inside, skin is one of the important part to take care of. A skin condition is one which affects the integumentary system and that includes a wide variety of diseases including dermatoses. Classifications of these skin conditions are always a challenge for any medical practiti…	2020	10.1016/j.measurement.2020.107922	Article	English	52	Balaji V.R., Suganthi S.T., Rajadevi R., Krishna Kumar V., Saravana Balaji B., Pandiyan S.	Scopus/Web of Science
103	Cutaneous Fungal Infections in Left Ventricular Assist Device Recipients	Purpose of Review: This review summarizes medical literature regarding fungal skin and soft tissue infections in recipients of left ventricular assist devices (LVADs). Recent Findings: Superficial fungal infections at the exit site are likely under-reported. Driveline-related fungal infections are well-described, with total parenteral nutrition as a known risk factor. They are typically due to ye…	2020	10.1007/s12281-020-00396-1	Review	English	0	Peraza J., Puius Y.A.	Scopus/Web of Science
104	Koi carp	Koi carp are ornamental carp developed from the domestic form of the common carp (Cyprinus carpio) in Japan in the early nineteenth century. This chapter provides information on the biological parameters of European wild carp Koi carp. It discusses the aquatic environment, clinical examination, basic sampling techniques, sedation and anaesthesia, analgesia, hospitalisation, common medical conditi…	2020	10.1002/9781119389934.ch22	Book Chapter	English	0	Thomas L.	Scopus
105	Recent advances in topical carriers of anti-fungal agents	Fungal skin infections are the most common global issue for skin health. Fungal infections are often treated by topical or systemic anti-fungal therapy. Topical fungal therapy is usually preferred because of their targeted therapy and fewer side effects. Advanced topical carriers because of their distinct structural and functional features, overcome biopharmaceutical challenges associated with co…	2020	10.1016/j.heliyon.2020.e04663	Review	English	24	Garg A., Sharma G.S., Goyal A.K., Ghosh G., Si S.C., Rath G.	Scopus/Web of Science/PubMed
106	Ketoconazole and Ketoconazole/β-cyclodextrin performance on cotton wound dressing as fungal skin treatment	Here, a cotton wound dressing was prepared with control release of Ketoconazole (KZ) to kill skin fungus. KZ alone and KZ/β-cyclodextrin (β-CD) were loaded on cotton through diverse methods. The drug release, antimicrobial activities against C. albicans, A. niger, E. coli and S. aureus and also cell cytotoxicity were studied. 1H NMR ensured the formation of KZ/β-CD complex, SEM images showed surf…	2020	10.1016/j.carbpol.2020.116267	Article	English	20	Hedayati N., Montazer M., Mahmoudirad M., Toliyat T.	Scopus/Web of Science/PubMed
107	HGT in the human and skin commensal Malassezia: A bacterially derived flavohemoglobin is required for NO resistance and host interaction	The skin of humans and animals is colonized by commensal and pathogenic fungi and bacteria that share this ecological niche and have established microbial interactions. Malassezia are the most abundant fungal skin inhabitant of warm-blooded animals and have been implicated in skin diseases and systemic disorders, including Crohn's disease and pancreatic cancer. Flavohemoglobin is a key enzyme inv…	2020	10.1073/pnas.2003473117	Article	English	17	Ianiri G., Coelho M.A., Ruchti F., Sparber F., McMahon T.J., Fu C., Bolejack M., Donovan O., Smutney H., Myler P., Dietrich F., Fox D., III, LeibundGut-Landmann S., Heitman J.	Scopus/Web of Science/PubMed
108	Dermatoses of the Caribbean: Burden of skin disease and associated socioeconomic status in the Caribbean	Introduction: Dermatologic disease represents a significant burden worldwide, but the regional effect of skin disease in the Caribbean and how it relates to socioeconomic status remain unknown. Objective: This study aims to measure the burden of skin disease in the Caribbean from epidemiologic and socioeconomic standpoints. Methods: We selected Global Burden of Disease Study data sets to analyze …	2020	10.1016/j.jdin.2020.03.002	Article	English	1	Giesey R.L., Mehrmal S., Uppal P., Delost M.E., Delost G.R.	Scopus/PubMed
109	Potential of naftifine application for transungual delivery	Naftifine is used to treat fungal skin infections as it inhibits dermatophytes, which are the cause of onychomycosis. However, naftifine's ability to permeate the human nail barrier has not been investigated, thus, the antimycotic potential is not clearly established. This work aims to evaluate the effect of penetration enhancing factors on the accumulation of naftifine hydrochloride through huma…	2020	10.3390/molecules25133043	Article	English	4	Šveikauskaite I., Briedis V.	Scopus/Web of Science/PubMed
110	Epidemiological characterization of pityriasis versicolor and distribution of Malassezia species among students in Hai Phong city, Vietnam	Background and Purpose: Pityriasis versicolor (PV) is a common fungal skin infection caused by Malassezia species. Previous studies have shown that the prevalence of PV is influenced by geographic factors. The aim of the current study was to find the epidemiological characteristics of PV and distribution of Malassezia species in the secondary school students living in Hai Phong city, Vietnam. Mat…	2020	10.18502/cmm.6.2.2838	Article	English	2	Nguyen B.D., Vo H.T.T., Thanh M.D.T., Van Vu T., Lai T.T.T., Nguyen M.T., Bui A.T.H., Van Trinh K., Cao L.B., Trieu S.T., Le D.T.K., Hoang S.C., Le A.T., Nguyen L.K., Do A.N.	Scopus/PubMed
111	Antimicrobial and cytotoxic activities of Senna and Cassia species (Fabaceae) extracts	In Brazilian traditional medicine, botanical species belonging to the genera Senna and Cassia are widely used as laxative, analgesic, and antifungal agents to treat ringworm and other fungal skin infections. This has motivated us to select and to screen ten species of these genera for their antibacterial, antifungal, and cytotoxic activities. The leaf or flower ethanol extracts were investigated …	2020	10.1016/j.indcrop.2019.112081	Article	English	11	do Nascimento M.N.G., Machado Martins M., Scalon Cunha L.C., de Souza Santos P., Goulart L.R., de Souza Silva T., Gomes Martins C.H., de Morais S.A.L., Pivatto M.	Scopus/Web of Science
112	Rare generalized form of fungal dermatitis in a horse: Case report	A rare case of Geotrichum spp. dermatitis in a horse is presented. After unrelated, previous surgery and antibiotic treatment, a saddle horse showed well-circumscribed areas of non-pruritic alopecia. Suspecting allergic skin disease, the horse was treated with corticosteroids. The skin lesion spread, and a second veterinarian was consulted. At clinical examination, the horse was lethargic, pyreti…	2020	10.3390/ani10050871	Article	English	2	Padalino B., Sandy J.R., Barrasso R., Trotta A., Bozzo G., Cafarchia C.	Scopus/Web of Science/PubMed
113	Influence of humidity on the acoustic properties of mushroom mycelium films used as sensitive layers for acoustic humidity sensors	The influence of humidity on the density, shear elastic module, viscosity, and thickness of the mushroom Pleurotus eryngii and Ganoderma lucidum mycelium films was studied. These data were obtained by comparing the theoretical and experimental frequency dependencies of the complex electrical impedance of bulk acoustic wave (BAW) resonator loaded by mycelium film using the least-squares method. Th…	2020	10.3390/s20092711	Article	English	12	Kuznetsova I., Zaitsev B., Krasnopolskaya L., Teplykh A., Semyonov A., Avtonomova A., Ziangirova M., Smirnov A., Kolesov V.	Scopus/Web of Science/PubMed
114	A review of the traditional use of southern African medicinal plants for the treatment of fungal skin infections	Ethnopharmacological relevance: Human dermatophyte infections are one of the most common classes of infection globally, with an estimated 1.7 billion people contracting at least one infection annually. Southern African ethnic groups used multiple plants to treat dermatophytosis and to alleviate the symptoms, yet the anti-dermatophyte properties of most species remain poorly explored. Aim of the s…	2020	10.1016/j.jep.2019.112539	Review	English	11	Cock I.E., Van Vuuren S.F.	Scopus/Web of Science/PubMed
115	Subcutaneous infection by Curvularia pallescens in a lung transplant recipient: First report in Spain [Micosis cutánea por Curvularia pallescens en un paciente trasplantado pulmonar: primer caso descrito en España]	Background: Curvularia is a filamentous dematiaceous fungus increasingly recognized as a pathogen in immunocompromised patients. The most common clinical entities associated with this fungus are allergic sinusitis, cutaneous infection and keratitis. In this article, a report on the first clinical case of Curvularia pallescens cutaneous infection in Spain and its treatment is described. Case repor…	2020	10.1016/j.riam.2020.03.005	Article	English; Spanish	0	Requena López S., Morales del Burgo P., Gómez Díez S., Boga J.A., Peláez García de la Rasilla T.	Scopus/Web of Science/PubMed
116	Ethosomes: A novel drug delivery system and their therapeutic applications-a review	“Ethosomes” are soft vesicles made up of Phospholipids, Ethanol and water. They are “novel carrier system” used for delivery of drugs having low penetration through biological membrane i.e., Skin “Transdermal delivery of drugs” plays a major role in the Ethosomes. In this review we are going to discuss about various applications of ethosomes i.e. Delivery of antibiotic, Delivery of NSAIDS, Anti-c…	2020	10.5958/0974-360x.2020.00355.8	Article	English	5	Shabreen M.R., Sangeetha S.	Scopus
117	TRAF1 suppresses antifungal immunity through CXCL1-mediated neutrophil recruitment during Candida albicans intradermal infection	Background: Candida albicans is the most common opportunistic human fungal pathogen. The chemokine ligand CXCL1 plays a protective role in fungal infection through the recruitment of neutrophils. TRAF1 (tumor necrosis factor-associated factor 1) can be highly induced by proinflammatory stimuli such as LPS and TNF and has been implicated in septic shock. However, the role of TRAF1 in infection, es…	2020	10.1186/s12964-020-00532-x	Article	English	8	Bai W., Wang Q., Deng Z., Li T., Xiao H., Wu Z.	Scopus/Web of Science/PubMed
118	Discovery of a novel and selective fungicide that targets fungal cell wall to treat dermatomycoses: 1,3-bis(3,4-dichlorophenoxy)propan-2-aminium chloride	Background: Fungal infections are highly prevalent and are responsible for high rates of morbidity and mortality. In this context, the search for new treatment alternatives is very relevant. Objectives: Analyse chemical compounds for antifungal potential against dermatomycosis fungi. Methods: The antifungal activity of 121 compounds, intermediates or derivatives of 1,3-bis(aryloxy)propane substit…	2020	10.1111/myc.13027	Article	English	3	Flores Dalla Lana D., Neiva Lavorato S., Minussi Giuliani L., Cruz L., Lopes W., Henning Vainstein M., Camargo Fontana I., Rigon Zimmer A., de Araújo Freitas M., de Andrade S.F., José Alves R., Meneghello Fuentefria A.	Scopus/Web of Science/PubMed
119	Fungal Infection: The Hidden Enemy?	Fungal Infection is a hidden enemy for mammals because it is inhibiting commonly in nasal and oral mucosa, where it colonizes and starts unwanted growth and form infection. The differentiation between pathogenicity with colonization and regular colonization in upper respiratory system infection is difficult initially. Sometimes fungal infection rate becomes high due to the immune system weakening…	2020	10.1007/978-981-15-7639-3_10	Book Chapter	English	0	Oves M., Rauf M.A., Husain F.M., Zubair M., Ismail I.M.I., Iyer A.	Scopus
120	Impact of 1,2,4-thio-triazole derivative-based liniment on morphological and immunological blood parameters of dogs suffering from dermatomycoses	The development of new preparations in soft medical form with antifungal effect and the ability to exert an antimicrobial effect on the secondary microflora accompanying the infection with accompanying desensitizing action is extremely relevant, as well as introduction of such drugs into veterinary medicine. The compound and compounding of the preparation with fungicidal and fungistatic effects f…	2020	10.15421/022044	Article	English	0	Hunchak V.M., Martynyshyn V.P., Gutyj B.V., Hunchak A.V., Stefanyshyn O.M., Parchenko V.V.	Scopus/Web of Science
121	Phytomedicines and their prospects in treatment of common skin diseases	The skin is the outermost organ of the body forming an active barrier to the external environment and experiences direct contact with various physical, chemical, and biological factors. Besides being a barrier to the external environment, the skin plays an important immunity role by protecting the body against active pathogens and thereby constitutes the first line of defense. Healthy and attract…	2020	10.1007/978-981-15-2195-9_21	Book Chapter	English	0	Rani H., Srivastava A.K.	Scopus
122	Primary cutaneous cryptococcosis in an older immunocompetent patient: A case report	Cryptococcus neoformans is an encapsulated yeast that can be found in pigeon droppings, hay, and dust. Primary cutaneous cryptococcosis (PCC) without systemic involvement is recognized as a distinct clinical condition and is rarely reported in immunocompetent patients. A 78-year-old woman with no history of other diseases except for hypertension presented with a painful diffuse erythematous plaqu…	2020	10.4235/agmr.20.0012	Article	English	1	Choi H., Kim Y.I., Na C.H., Kim M.S., Shin B.S.	Scopus/Web of Science/PubMed
123	Interleukin-36 family as a novel regulator of inflammation in the barrier tissues [СЕМЕЙСТВО ИНТЕРЛЕЙКИНА-36 КАК НОВЫЙ РЕГУЛЯТОР ВОСПАЛИТЕЛЬНОГО ОТВЕТА В БАРЬЕРНЫХ ТКАНЯХ]	The interleukin-36 (IL-36) family was discerned in the superfamily of interleukin-1 (IL-1) ten years ago. This family includes three isoforms of IL-36α, IL-36β, IL-36γ, which have pro-inflammatory activity and a specific receptor antagonist, IL-36ra, which implements anti-inflammatory function. All of them bind to the same IL-1R6 receptor. The pro-inflammatory isoforms also involve an accessory I…	2020	10.15789/1563-0625-ifa-1880	Article	Russian	1	Sennikova S.V., Toptygina A.P.	Scopus
124	Atopic dermatitis. Interdisciplinary diagnostic and therapeutic recommendations of the Polish Dermatological Society, Polish Society of Allergology, Polish Pediatric Society and Polish Society of Family Medicine. Part I. Prophylaxis, topical treatment and phototherapy	Atopic dermatitis is a chronic and recurrent inflammatory dermatosis with concomitant intensive pruritus, and is diagnosed both in children and adults. Atopic dermatitis-patients are predisposed to have bacterial, viral and fungal skin infections; they also suffer from an increased risk of developing food allergies (especially, at an infantile age), allergic rhinitis, or bronchial asthma (a so-ca…	2020	10.5114/ada.2020.93423	Article	English	6	Nowicki R.J., Trzeciak M., Kaczmarski M., Wilkowska A., Czarnecka-Operacz M., Kowalewski C., Rudnicka L., Kulus M., Mastalerz-Migas A., Peregud-Pogorzelski J., Sokolowska-Wojdylo M., Spiewak R., Adamski Z., Czuwara J., Kapiñska-Mrowiecka M., Kaszuba A., Krasowska D., Krêcisz B., Narbutt J., Majewski S., Reich A., Samochocki Z., Szepietowski J., Wozniak K.	Scopus/PubMed
125	Inhibition of the growth of human dermatophytic pathogens by selected australian and asian plants traditionally used to treat fungal infections	Objective: Syzygium australe (H.L. Wnddl. ex. Link) B. Hyland, Syzygium luehmannii (F. Muell.) L.A.S. Johnson, Syzygium jambos L. (Alston), Terminalia ferdinandiana Exell. and Tasmannia lanceolata (Poir.) A.C.Sm. are used in traditional Australian Aboriginal and Asian healing systems to treat a variety of pathogenic diseases including fungal skin infections, yet they are yet to be examined for th…	2019	10.1016/j.mycmed.2019.05.003	Article	English	6	Noé W., Murhekar S., White A., Davis C., Cock I.E.	Scopus/Web of Science/PubMed
126	Ecological Correlates of Large-Scale Turnover in the Dominant Members of Pseudacris crucifer Skin Bacterial Communities	Animals host a wide diversity of symbiotic microorganisms that contribute important functions to host health, and our knowledge of what drives variation in the composition of these complex communities continues to grow. Microbiome studies at larger spatial scales present opportunities to evaluate the contribution of large-scale factors to variation in the microbiome. We conducted a large-scale fi…	2019	10.1007/s00248-019-01372-0	Article	English	5	Hughey M.C., Sokol E.R., Walke J.B., Becker M.H., Belden L.K.	Scopus/Web of Science/PubMed
127	Zombie Cells, Composite Cells of Fungal–Human Keratinocytes of Plantar Hyperkeratosis-Like Lesions	Foot hyperkeratosis is common. They often coincide with fungal infections, are difficult to cure and relapse rates are high. In this case study, longstanding and intractable plantar hyperkeratotic lesions were investigated for potential causative agents by histological examinations, by using human cell culture medium to grow the infected skin tissue, by sequencing ribosomal DNA and whole genome. …	2019	10.1007/s11046-019-00369-0	Article	English	1	Zhu C.X., Li X., Tan X., Wu G.	Scopus/Web of Science/PubMed
128	Influence of nutrition, common autoimmune diseases and smoking on the incidence of foot mycoses [Einfluss von Ernährung, autoimmunen Volkskrankheiten und Rauchen auf die Erkrankungshäufigkeit von Fußmykosen]	Background: Foot mycoses, including onychomycoses, are worldwide infectious diseases. As part of a regional survey using randomly selected residents of in Mecklenburg–Western Pomerania, we investigated the impact of dietary habits, the presence of most frequent autoimmune diseases and current smoking on fungal skin infections in order to reveal potential new risk factors to elucidate potential pr…	2019	10.1007/s00105-019-4441-5	Review	German	1	Daeschlein G., Rauch L., Haase H., Arnold A., Lutze S., von Podewils S., Niggemeier M., Jünger M.	Scopus/Web of Science/PubMed
129	Bisifusarium Delphinoides, an Emerging Opportunistic Pathogen in a Burn Patient with Diabetes Mellitus	An 82-year-old man with diabetes was admitted to the emergency department with a third-degree burn on his left leg. The deep swab specimen from his left leg was cultured on Sabouraud dextrose agar without cycloheximide and incubated at 25 °C for 5 days. On the basis of morphological characteristics and multigene phylogenetic analyses of the internal transcribed spacer region of ribosomal DNA and …	2019	10.1080/12298093.2019.1628521	Article	English	2	Park J.-H., Oh J., Song J.-S., Kim J., Sung G.-H.	Scopus/Web of Science/PubMed
130	The value of diclofenac gel 1% in the treatment of pityriasis versicolor in a sample of Iraqi patients	One of the commonly encountered skin disorders seen in daily clinical practice is the benign superficial fungal skin infection known as tinea versicolor or pityriasis versicolor. Clinically it presents as macules with fine scales that are either hypopigmented or hyperpigmented involving most often the neck, upper extremities, and the trunk. However, because of the high rate of recurrence and freq…	2019	10.31838/ijpr/2019.11.03.004	Article	English	0	Swadi A.A.J., Jabur A.H.	Scopus
131	White chalky dermatitis in a very preterm neonate with fungal skin infection	[No abstract available]	2019	10.1136/archdischild-2018-316451	Note	English	1	Tomobe Y., Yoneda R., Horikoshi Y., Okazaki K.	Scopus/Web of Science/PubMed
132	The detection of house dust mite Dermatophagoides farinae, Der f 2 and Zen-1 allergen-specific immunoglobulin E antibodies in dogs with atopic Dermatitis in Malaysia	Canine atopic dermatitis (AD) is a chronic, inflammatory and pruritic allergic skin disease in dogs. House dust mites such as Dermatophagoides farinae are one of the known causative agents for the induction of canine AD worldwide. D. farinae protein Der f 2 is known as an important allergen involved in canine AD and recently, Zen-1 has also been identified as an allergenic protein. There is limit…	2019	10.1016/j.vetimm.2019.05.002	Article	English	4	Chan W.Y., Selvarajah G.T., Ajat M., Suzuki R., Tsukui T.	Scopus/Web of Science/PubMed
133	Dermatophytosis in cats and dogs: A practical guide to diagnosis and treatment	Dermatophytosis is an infectious and contagious superficial fungal skin disease of dogs and cats. The disease is not life threatening and will resolve without intervention; however, treatment is recommended to shorten the course of infection and limit transmission. This article summarises the major learning points identified in a recent evidence-based review on this disease (Moriello and others 2…	2019	10.1136/inp.l1539	Article	English	4	Moriello K.	Scopus/Web of Science
134	Three cases of non-carryover fingolimod-PML: Is the risk in Japan increased?	ObjectiveTo report the course of 3 recent Japanese and European cases of fingolimod-associated progressive multifocal leukoencephalopathy (PML) and to analyze its risk factors and increased incidence in Japan.MethodsCase series and literature review.ResultsFingolimod-associated PML may cause both supratentorial and infratentorial lesions and a pronounced disability. Diagnosis can be challenging b…	2019	10.1212/nxi.0000000000000559	Article	English	16	Nakahara J., Tomaske L., Kume K., Takata T., Kamada M., Deguchi K., Kufukihara K., Schneider R., Gold R., Ayzenberg I.	Scopus/Web of Science/PubMed
135	Decontamination of 70 foster family homes exposed to Microsporum canis infected cats: a retrospective study	Background: Dermatophytosis is a superficial fungal skin disease of animals. A key part of treatment is cleaning and disinfection of the environment to prevent false-positive results due to fomite carriage. Furthermore, there is a perception in the lay literature that decontamination of homes is difficult or impossible. Clinical Summary: Data from a 10 year period identified 70 foster family home…	2019	10.1111/vde.12722	Article	English	3	Moriello K.A.	Scopus/Web of Science/PubMed
136	Modelling invasive pathogen load from non-destructive sampling data	Where microbes colonizing skin surface may help maintain organism homeostasis, those that invade living skin layers cause disease. In bats, white-nose syndrome is a fungal skin infection that affects animals during hibernation and may lead to mortality in severe cases. Here, we inferred the amount of fungus that had invaded skin tissue of diseased animals. We used simulations to estimate the unob…	2019	10.1016/j.jtbi.2018.12.026	Article	English	5	Martínková N., Škrabánek P., Pikula J.	Scopus/Web of Science/PubMed
137	Treatment, prevention and public health management of impetigo, scabies, crusted scabies and fungal skin infections in endemic populations: a systematic review	We conducted a systematic review of the treatment, prevention and public health control of skin infections including impetigo, scabies, crusted scabies and tinea in resource-limited settings where skin infections are endemic. The aim is to inform strategies, guidelines and research to improve skin health in populations that are inequitably affected by infections of the skin and the downstream con…	2019	10.1111/tmi.13198	Review	English	20	May P.J., Tong S.Y.C., Steer A.C., Currie B.J., Andrews R.M., Carapetis J.R., Bowen A.C.	Scopus/Web of Science/PubMed
138	Fabrication factors influencing mechanical, moisture- and water-related properties of mycelium-based composites	Mycelium-based composites result from the growth of filamentous fungi on organic materials such as agricultural waste streams. These novel biomaterials represent a promising alternative for product design and manufacturing both in terms of sustainable manufacturing processes and circular lifespan. This study shows that their morphology, density, tensile and flexural strength, as well as their moi…	2019	10.1016/j.matdes.2018.11.027	Article	English	158	Appels F.V.W., Camere S., Montalti M., Karana E., Jansen K.M.B., Dijksterhuis J., Krijgsheld P., Wösten H.A.B.	Scopus/Web of Science
139	Atopic dermatitis. Interdisciplinary diagnostic and therapeutic recommendations of the Polish dermatological society, Polish society of allergology, Polish pediatric society and polish society of family medicine. Part I. Prophylaxis, topical treatment and phototherapy [Atopowe zapalenie skóry. Interdyscyplinarne rekomendacje diagnostyczno-terapeutyczne polskiego towarzystwa dermatologicznego, pol…	Atopic dermatitis is a chronic and recurrent inflammatory dermatosis with concomitant intensive pruritus, and is diagnosed both in children and adults. Atopic dermatitis -patients are predisposed to have bacterial, viral and fungal skin infections; they also suffer from an increased risk of developing food allergies (especially, at an infantile age), allergic rhinitis, or bronchial asthma (a so-c…	2019	10.5114/dr.2019.88253	Article	English; Polish	4	Nowicki R.J., Trzeciak M., Kaczmarski M., Wilkowska A., Czarnecka-Operacz M., Kowalewski C., Rudnicka L., Kulus M., Mastalerz-Migas A., Peregud-Pogorzelski J., Sokołowska-Wojdyło M., Śpiewak R., Adamski Z., Czuwara J., Kapińska-Mrowiecka M., Kaszuba A., Krasowska D., Kręcisz B., Narbutt J., Majewski S., Reich A., Samochocki Z., Szepietowski J., Woźniak K.	Scopus/Web of Science
140	In vitro antifungal activity of Japanese folk herb extracts against Trichophyton rubrum	Folk herbs are vital to the Japanese health care system, with some being used to treat fungal skin infections. We tested folk herbs used in traditional Japanese medicine for in vitro antifungal activity against Trichophyton rubrum, the most common pathogen in patients with superficial dermatitis. Acetone, ethanol, methanol, water, and acetic acid extracts from 15 species of Japanese folk herbs (B…	2019	10.4265/bio.24.109	Article	English	2	Da X., Tie D., Murata S., Morita E.	Scopus/Web of Science/PubMed
141	Chloroacetamide derivatives as a promising topical treatment for fungal skin infections	The aim of this study was to evaluate the antifungal potential of 11 chloroacetamide derivatives and derivative incorporated into a film-forming system (FFS) as a potential alternative for the topical treatment of superficial and skin mycoses. The minimum inhibitory concentration (MIC) evaluation followed Clinical and Laboratory Standards Institute protocols M27-A3 (Candida) and M28-A2 (dermatoph…	2019	10.1080/00275514.2019.1620550	Article	English	4	Machado G.D.R.M., Fernandes de Andrade S., Pippi B., Bergamo V.Z., Jacobus Berlitz S., Lopes W., Lavorato S.N., Clemes Külkamp Guerreiro I., Vainstein M.H., Teixeira M.L., Alves R.J., Fuentefria A.M.	Scopus/Web of Science/PubMed
142	Topical fenticonazole in dermatology and gynaecology. Current role in therapy: Literature review	The objective of this review is to present the current clinical data on the use of fenticonazole, including data on its efficacy in mixed infections, and to discuss the clinical role of fenticonazole in dermatological and gynaecological indications. Fenticonazole is an imidazole derivative with a broad spectrum of antimycotic activity against dermatophytes and yeasts in in vitro and clinical stud…	2019	10.18370/2309-4117.2018.47.78-82	Article	Ukrainian	0	Veraldi S., Milani R.	Scopus
143	Growth regulation in amphibian pathogenic chytrid fungi by the quorum sensing metabolite tryptophol	Amphibians face many threats leading to declines and extinctions, but the chytrid fungal skin pathogens Batrachochytrium dendrobatidis (Bd) and Batrachochytrium salamandrivorans (Bsal) have been identified as the causative factors leading to one of the greatest disease-driven losses of amphibian biodiversity worldwide. Infection may lead to different clinical outcomes, and lethal infections are c…	2019	10.3389/fmicb.2018.03277	Article	English	4	Verbrugghe E., Adriaensen C., Martel A., Vanhaecke L., Pasmans F.	Scopus/Web of Science/PubMed
144	Epidermal epidemic: Unravelling the pathogenesis of chytridiomycosis	Chytridiomycosis, a lethal fungal skin disease of amphibians, fatally disrupts ionic and osmotic homeostasis. Infected amphibians increase their skin shedding rate (sloughing) to slow pathogen growth, but the sloughing process also increases skin permeability. Healthy amphibians increase active ion uptake during sloughing by increasing ion transporter abundance to offset the increased skin permea…	2019	10.1242/jeb.191817	Article	English	8	Wu N.C., Cramp R.L., Ohmer M.E.B., Franklin C.E.	Scopus/Web of Science/PubMed
145	Corneal targeted Sertaconazole nitrate loaded cubosomes: Preparation, statistical optimization, in vitro characterization, ex vivo permeation and in vivo studies	Sertaconazole nitrate (STZ) is a poorly soluble antifungal drug commonly used for treating fungal skin infections. Introducing it as a new treatment option for the management of fungal keratitis, requires the development of a delivery system capable of targeting the infected cornea with an adequate STZ concentration. Hence, Sertaconazole nitrate loaded cubosomes (STZ-CUBs) were prepared, characte…	2018	10.1016/j.ijpharm.2018.10.057	Article	English	46	Younes N.F., Abdel-Halim S.A., Elassasy A.I.	Scopus/Web of Science/PubMed
146	Epidemiological and clinical aspects of dermatophytoses in eastern Slovakia: A retrospective three-year study	Objective: A three-year retrospective study of fungi isolated from samples of patients with suspected fungal skin infections in Eastern Slovakia is presented. Methods: A total of 11,989 samples were collected and investigated with direct microscopic examination using 20% KOH and cultivated in Sabouraud and Mycosel medium. Identification was based on macroscopic and microscopic characteristics. Re…	2018	10.21101/cejph.a5279	Article	English	6	Baranová Z., Kampe T., Dorko E., Rimárová K.	Scopus/Web of Science/PubMed
147	Trichophyton mentagrophytes—from snow leopard to man: A molecular approach for uncovering the chain of infection [Trichophyton mentagrophytes – vom Schneeleoparden zum Menschen: Ein molekularer Ansatz zur Aufdeckung der Infektionskette]	Sources of infection for Trichophyton (T.) mentagrophytes—a zoophilic dermatophyte—comprise pet rodents (guinea pigs, mice, rabbits) and sometimes cats. Human infections due to dermatophytes after contact with zoo animals, however, are extreme rare. Four zoo keepers from Basel Zoo were diagnosed to suffer from tinea manus and tinea corporis due to T. mentagrophytes. The 22-year-old daughter of on…	2018	10.1007/s00105-018-4234-2	Article	German	6	Grob H., Wyss F., Wenker C., Uhrlaß S., Krüger C., Mayser P., Nenoff P.	Scopus/Web of Science/PubMed
148	Chytridiomycosis causes catastrophic organism-wide metabolic dysregulation including profound failure of cellular energy pathways	Chytridiomycosis is among several recently emerged fungal diseases of wildlife that have caused decline or extinction of naïve populations. Despite recent advances in understanding pathogenesis, host response to infection remains poorly understood. Here we modelled a total of 162 metabolites across skin and liver tissues of 61 frogs from four populations (three long-exposed and one naïve to the f…	2018	10.1038/s41598-018-26427-z	Article	English	15	Grogan L.F., Skerratt L.F., Berger L., Cashins S.D., Trengove R.D., Gummer J.P.A.	Scopus/Web of Science/PubMed
149	Review of the amphibian immune response to chytridiomycosis, and future directions	The fungal skin disease, chytridiomycosis (caused by Batrachochytrium dendrobatidis and B. Salamandrivorans), has caused amphibian declines and extinctions globally since its emergence. Characterizing the host immune response to chytridiomycosis has been a focus of study with the aim of disease mitigation. However, many aspects of the innate and adaptive arms of this response are still poorly und…	2018	10.3389/fimmu.2018.02536	Review	English	75	Grogan L.F., Robert J., Berger L., Skerratt L.F., Scheele B.C., Castley J.G., Newell D.A., McCallum H.I.	Scopus/Web of Science/PubMed
150	Dermatophytosis in a tertiary care teaching hospital of Odisha: A study of 100 cases of superficial fungal skin infection	Introduction: Dermatophytosis is common superficial fungal infection of the skin. Recurrent dermatophytosis has become a troublesome entity in a tropical country like India and also carries a great psychosocial problem. The present study was undertaken with the aim to isolate and identify different species of dermatophyte and to study their clinical pattern. Materials and Method: The study was co…	2018	10.5958/0976-5506.2018.01416.x	Article	English	1	Jena A.K., Lenka R.K., Sahu M.C.	Scopus
151	A sustainable production method of mycelium biomass using an isolated fungal strain Phanerochaete chrysosporium (accession no: KY593186): Its exploitation in wound healing patch formation	The present study reports the tuning of the culture condition for the synthesis of fibrous composite mycelium biomass having important physical properties by using an isolated novel fungal strain. The Internal Transcribed Spacer sequencing revealed that the isolated fungal strain has a close proximity with Phanerochaete chrysosporium (accession no: KY593186). The formation of the mycelium was con…	2018	10.1016/j.bcab.2018.09.013	Article	English	6	Khamrai M., Banerjee S.L., Kundu P.P.	Scopus
152	Two subspecies of bent-winged bats (Miniopterus orianae bassanii and oceanensis) in southern Australia have diverse fungal skin flora but not Pseudogymnoascus destructans	Fungi are increasingly being documented as causing disease in a wide range of faunal species, including Pseudogymnoascus destructans, the fungus responsible for white nose syndrome which is having a devastating impact on bats in North America. The population size of the Australian southern bent-winged bat (Miniopterus orianae bassanii), a critically endangered subspecies, has declined over the pa…	2018	10.1371/journal.pone.0204282	Article	English	21	Holz P.H., Lumsden L.F., Marenda M.S., Browning G.F., Hufschmid J.	Scopus/Web of Science/PubMed
153	Dermatoscopy of Parasitic and Infectious Disorders	The use of dermatoscopy in the diagnosis and management of parasitic and infectious skin disorders has been defined as entodermoscopy, and several studies have confirmed its advantages in dermatology. Dermatoscopic patterns of several parasitic, viral, and fungal skin infections have been identified and herein described. A noninvasive, fast, and accurate diagnosis plays an important role in conta…	2018	10.1016/j.det.2018.05.002	Review	English	12	Verzì A.E., Lacarrubba F., Dinotta F., Micali G.	Scopus/Web of Science/PubMed
154	Prevalence and Clinical Correlation of Superficial Fungal Foot Infection in Thai Naval Rating Cadets	Background: Superficial fungal foot infection is one of the most important dermatological diseases currently affecting military personnel. Many Thai naval rating cadets are found to suffer from superficial fungal foot infections and their sequels. Objective: To investigate prevalence, potent risk factors, responding pathogens and clinical correlation of superficial fungal foot infection in Thai n…	2018	10.1093/milmed/usx187	Article	English	5	Ongsri P., Bunyaratavej S., Leeyaphan C., Pattanaprichakul P., Ongmahutmongkol P., Komoltri C., Kulthanan K.	Scopus/Web of Science/PubMed
155	A novel technique of aluminum multiplier slide culture for fungal identification	Objective: Single slide culture technique (SSC) is the standard method of preparing fungal colonies for species identification. As contamination was frequently found, restarting the process wasted time and delayed diagnosis for patients. Aluminum slide culture (ASC) is the novel method, which aims to increase more fungal colonies in same time. Even through, some colonies showed contamination, the…	2018	10.14456/smj.2018.68	Article	English	1	Matthapan L., Prasong W., Leeyaphan C., Bunyaratavej S., Lertrujiwanit K.	Scopus
156	Extensive cutaneous chromomycosis: Efficacy of combined terbinafine and cryotherapy [Chromomycose cutanée étendue : efficacité de l'association terbinafine et cryothérapie]	Background: Chromomycosis is a chronic fungal skin infection, mainly affecting the limbs. It is responsible for severe morbidity and its treatment remains long and disappointing. Rarely described in Morocco, we report a new observation that has evolved very well under treatment combining terbinafine and cryotherapy over a short duration. Case report: A 56-year-old patient, immunocompetent, had a …	2018	10.1016/j.annder.2018.04.005	Article	English; French	3	Elkhachine Y., Elbenaye J., Er-Rami M., Sakkah A., Jakar A., Elhaouri M.	Scopus/Web of Science/PubMed
157	Common environmental dermatomycoses	Environmental fungal skin disorders (EFSD) or dermatomycoses have a worldwide distribution, with high prevalence in most developing countries. Causal agents include dermatophytes and opportunistic fungi (Malassezia, Candida, Trichosporon, Rhodotorula, Cryptococcus or Aspergillus, Geotrichum, Alternaria, etc.). Besides their specific risk factors, common superficial dermatomycoses share common gro…	2018	10.1007/978-981-10-8758-5_11	Book Chapter	English	0	Ngatu N.R.	Scopus
158	A perspective study of cutaneous manifestations in primary psychiatric disorders in a tertiary care hospital	Background: Cutaneous disorders are frequently seen in psychiatric patients. This may be attributed to the common ectodermal origin of skin and neurons. There is a paucity of data on cutaneous comorbidity in primary psychiatric disorders. Aims: The aim of this study is to determine the pattern of cutaneous manifestations in patients with primary psychiatric disorders Settings and Design: This was…	2018	10.4103/psychiatry.indianjpsychiatry_156_18	Review	English	6	George A., Girisha B., Rao S.	Scopus/Web of Science/PubMed
159	Introduced bullfrog facilitates pathogen invasion in the western United States	Batrachochytrium dendrobatidis (Bd), a causal agent of the amphibian fungal skin disease chytridiomycosis, has been implicated in the decline and extinction of over 200 species worldwide since the 1970s. Despite almost two decades of research, the history of Bd and its global spread is not well understood. However, the spread of the Global Panzootic Lineage of Bd (Bd-GPL), the lineage associated …	2018	10.1371/journal.pone.0188384	Article	English	30	Yap T.A., Koo M.S., Ambrose R.F., Vredenburg V.T.	Scopus/Web of Science/PubMed
160	Survival, gene and metabolite responses of Litoria verreauxii alpina frogs to fungal disease chytridiomycosis	The fungal skin disease chytridiomycosis has caused the devastating decline and extinction of hundreds of amphibian species globally, yet the potential for evolving resistance, and the underlying pathophysiological mechanisms remain poorly understood. We exposed 406 naïve, captive-raised alpine tree frogs (Litoria verreauxii alpina) from multiple populations (one evolutionarily naïve to chytridio…	2018	10.1038/sdata.2018.33	Article	English	8	Grogan L.F., Mulvenna J., Gummer J.P.A., Scheele B.C., Berger L., Cashins S.D., McFadden M.S., Harlow P., Hunter D.A., Trengove R.D., Skerratt L.F.	Scopus/Web of Science/PubMed
161	Evolution of resistance to chytridiomycosis is associated with a robust early immune response	Potentiating the evolution of immunity is a promising strategy for addressing biodiversity diseases. Assisted selection for infection resistance may enable the recovery and persistence of amphibians threatened by chytridiomycosis, a devastating fungal skin disease threatening hundreds of species globally. However, knowledge of the mechanisms involved in the natural evolution of immunity to chytri…	2018	10.1111/mec.14493	Article	English	31	Grogan L.F., Cashins S.D., Skerratt L.F., Berger L., McFadden M.S., Harlow P., Hunter D.A., Scheele B.C., Mulvenna J.	Scopus/Web of Science/PubMed
162	The development of a rational approach to the therapy of fungal skin infections as the basis of effective treatment	The paper presents a literature review focusing on the comparative analysis of the efficacy and safety of topical antifungals of various pharmaceutical groups. We used data from 74 publications of international and Russian authors when preparing this article, including the results of author’s own long-term studies. It was shown that sertaconazole is a highly active antifungal with a broad-spectru…	2018	10.17116/klinderma201817217-26	Review	Russian	1	Sokolova T.V.	Scopus
163	Fonsecaea pedrosoi-induced chromoblastomycosis: About a case [Chromomycose cutanée à fonsecaea pedrosoi: à propos d’un cas]	We report the case of a 13-year old female patient from rural areas presenting with papulonodular lesion of 4/3cm in the lower third of the right leg, evolving over the last two years. Skin biopsy showed papillomatous hyperplasia with neutrophilic microabscess and spores. Direct mycological examination showed fumagoid bodies and Fonsecaea pedrosoi was isolated from culture. The patient underwent …	2018	10.11604/pamj.2018.30.187.5326	Article	French	1	Baline K., Hali F.	Scopus/Web of Science/PubMed
164	The association between low grade systemic inflammation and skin diseases: A cross-sectional survey in the Northern Finland Birth Cohort 1966	Low grade inflammation is associated with many noncommunicable diseases. The association between skin diseases in general and systemic inflammation has not previously been studied at the population level. A whole-body investigation on 1,930 adults belonging to Northern Finland Birth Cohort 1966 was performed and high sensitive C-reactive protein (CRP) level was measured as a marker of low grade i…	2018	10.2340/00015555-2795	Article	English	23	Sinikumpu S.-P., Huilaja L., Auvinen J., Jokelainen J., Puukka K., Ruokonen A., Timonen M., Tasanen K.	Scopus/Web of Science
165	Criteria for suspicion and diagnosis of skin infections [Criterios de sospecha y diagnóstico de las infecciones cutáneas]	Types Skin infections are increasing in frequency and severity and can be classified into 3 large groups: bacterial, fungal and viral. Treatment Most bacterial infections, of typical clinical presentation, can be treated empirically. If there is doubt as to the diagnosis, a sample of the lesion is obtained for gram stain and culture. Necrotising fasciitis is an exception because if suspected, an …	2018	10.1016/j.med.2017.12.011	Article	English; Spanish	0	Muñoz L.C., Guerra E.G., Muñoz J.P., López-Bran E.	Scopus
166	Composition of micro-eukaryotes on the skin of the cascades frog (Rana cascadae) and patterns of correlation between skin microbes and Batrachochytrium dendrobatidis	Global amphibian decline linked to fungal pathogens has galvanized research on applied amphibian conservation. Skin-associated bacterial communities of amphibians have been shown to mediate fungal skin infections and the development of probiotic treatments with antifungal bacteria has become an emergent area of research. While exploring the role of protective bacteria has been a primary focus for…	2017	10.3389/fmicb.2017.02350	Article	English	13	Kueneman J.G., Weiss S., McKenzie V.J.	Scopus/Web of Science/PubMed
167	White-nose syndrome increases torpid metabolic rate and evaporative water loss in hibernating bats	Fungal diseases of wildlife typically manifest as superficial skin infections but can have devastating consequences for host physiology and survival. White-nose syndrome (WNS) is a fungal skin disease that has killed millions of hibernating bats in North America since 2007. Infection with the fungus Pseudogymnoascus destructans causes bats to rewarm too often during hibernation, but the cause of …	2017	10.1152/ajpregu.00058.2017	Article	English	40	McGuire L.P., Mayberry H.W., Willis C.K.R.	Scopus/Web of Science/PubMed
168	Transcriptome sequencing and analysis of zinc-uptake-related genes in Trichophyton mentagrophytes	Background: Trichophyton mentagrophytes is an important zoonotic dermatophytic (ringworm) pathogen; causing severe skin infection in humans and other animals worldwide. Fortunately, commonly used fungal skin disease prevention and treatment measures are relatively simple. However, T. mentagrophytes is primarily studied at the epidemiology and drug efficacy research levels, yet current study has b…	2017	10.1186/s12864-017-4284-3	Article	English	9	Zhang X., Dai P., Gao Y., Gong X., Cui H., Jin Y., Zhang Y.	Scopus/Web of Science/PubMed
169	Dermal miconazole nitrate nanocrystals – formulation development, increased antifungal efficacy & skin penetration	Miconazole nitrate nanosuspension was developed to increase its antifungal activity and dermal penetration. In addition, the nanosuspension was combined with the synergistic additive chlorhexidine digluconate. The production was performed by wet bead milling and both production and formulation parameters were optimized. A stabilizer screening revealed poloxamer 407 and Tween 80 both at 0.15% as t…	2017	10.1016/j.ijpharm.2017.08.108	Article	English	33	Pyo S.M., Hespeler D., Keck C.M., Müller R.H.	Scopus/Web of Science/PubMed
170	Unexpected isolation of leclercia adecarboxylata in dermatitis of a dog	A two-year-old intact male Labrador retriever was presented with generalized erythema, pustule and pruritus. A skin screening test revealed that there were no fleas but bacteria and dermatophytes were present. Blood testing revealed no remarkable findings. The patient was prescribed systemic medication of enrofloxacin 30 mg/kg once a day and itraconazole 10 mg/kg once a day and topical medication…	2017	10.17555/jvc.2017.10.34.5.381	Article	English	0	Jung H., Cho H., Lee J.B., Yoon J.W., Chung J.-Y.	Scopus
171	A pilot single centre, double blind, placebo controlled, randomized, parallel study of Calmagen® dermaceutical cream and lotion for the topical treatment of tinea and onychomycosis	Background: Most of the current anti-fungal treatments are chemical-based, fungistatic, have low efficacy in the treatment of tinea and toxicity concerns, while onychomycosis remains recalcitrant to most antifungal therapies. The study aimed to establish the fungicidal, efficacy and safety profile of Calmagen® dermaceutical cream and lotion containing AMYCOT® as a topical treatment in patients wi…	2017	10.1186/s12906-017-1970-2	Article	English	6	Parekh M., Ramaiah G., Pashilkar P., Ramanujam R., Johnston P., Ilag L.L.	Scopus/Web of Science/PubMed
172	Global, regional, and national disability-adjusted life-years (DALYs) for 333 diseases and injuries and healthy life expectancy (HALE) for 195 countries and territories, 1990-2016: A systematic analysis for the Global Burden of Disease Study 2016	Background: Measurement of changes in health across locations is useful to compare and contrast changing epidemiological patterns against health system performance and identify specific needs for resource allocation in research, policy development, and programme decision making. Using the Global Burden of Diseases, Injuries, and Risk Factors Study 2016, we drew from two widely used summary measur…	2017	10.1016/s0140-6736(17)32130-x	Article	English	1380	Hay S.I., Abajobir A.A., Abate K.H., Abbafati C., Abbas K.M., Abd-Allah F., Abdulle A.M., Abebo T.A., Abera S.F., Aboyans V., Abu-Raddad L.J., Ackerman I.N., Adedeji I.A., Adetokunboh O., Afshin A., Aggarwal R., Agrawal S., Agrawal A., Kiadaliri A.A., Ahmed M.B., Aichour A.N., Aichour I., Aichour M.T.E., Aiyar S., Akinyemiju T.F., Akseer N., Al Lami F.H., Alahdab F., Al-Aly Z., Alam K., Alam N., …	Scopus
173	Colonic basidiobolomycosis with liver involvement masquerading as gastrointestinal lymphoma: A case report and literature review	Basidiobolomycosis is an unusual fungal skin infection that rarely involves the gastrointestinal tract. This study reported a 5-year-old boy with gastrointestinal basidiobolomycosis that had been misdiagnosed as gastrointestinal lymphoma. He was treated by surgical resection and a combination of posaconazole and amphotericin B deoxycholate with an acceptable response and no recurrence. © 2017, So…	2017	10.1590/0037-8682-0057-2017	Review	English	6	Zekavat O.R., Abdolkarimi B., Pouladfar G., Fathpour G., Mokhtari M., Shakibazad N.	Scopus/Web of Science/PubMed
174	Diagnosis and investigation of fungal skin and nail infections	[No abstract available]	2017	10.1136/dtb.2017.8.0524	Note	English	1	[No author name available]	Scopus/PubMed
175	White-nose syndrome pathology grading in nearctic and palearctic bats	While white-nose syndrome (WNS) has decimated hibernating bat populations in the Nearctic, species from the Palearctic appear to cope better with the fungal skin infection causing WNS. This has encouraged multiple hypotheses on the mechanisms leading to differential survival of species exposed to the same pathogen. To facilitate intercontinental comparisons, we proposed a novel pathogenesis-based…	2017	10.1371/journal.pone.0180435	Article	English	32	Pikula J., Amelon S.K., Bandouchova H., Bartonička T., Berkova H., Brichta J., Hooper S., Kokurewicz T., Kolarik M., Köllner B., Kovacova V., Linhart P., Piacek V., Turner G.G., Zukal J., Martínková N.	Scopus/Web of Science/PubMed
176	Antifungal effects of the biological agent Pythium oligandrum observed in vitro	Objectives: Dermatophytosis, commonly known as ringworm, is a superficial fungal skin disease and zoonosis. Pythium oligandrum is a micromycete with mycoparasitic properties that is used in agriculture to control fungal infections on plants. Formulations containing P oligandrum were also developed for the treatment of dermatophytoses, but only a small number of case studies have been published. I…	2017	10.1177/1098612x16658690	Article	English	3	Načeradská M., Fridrichová M., Kellnerová D., Peková S., Lány P.	Scopus/Web of Science/PubMed
177	Cutaneous Manifestations of Diabetes Mellitus: A Review	Diabetes mellitus is a widespread endocrine disease with severe impact on health systems worldwide. Increased serum glucose causes damage to a wide range of cell types, including endothelial cells, neurons, and renal cells, but also keratinocytes and fibroblasts. Skin disorders can be found in about one third of all people with diabetes and frequently occur before the diagnosis, thus playing an i…	2017	10.1007/s40257-017-0275-z	Review	English	94	Lima A.L., Illing T., Schliemann S., Elsner P.	Scopus/Web of Science/PubMed
178	Sertaconazole nitrate loaded nanovesicular systems for targeting skin fungal infection: In-vitro, ex-vivo and in-vivo evaluation	The aim of this study was to develop different vesicular systems for sertaconazole nitrate and evaluate the ability of targeting deep skin layers to treat dermal fungal infection. Therefore, different phospholipid based nanovesicles, namely liposomes, glycerosomes, transferosmes and ethosomes were prepared and in-vitro evaluated for morphology, entrapment efficiency, vesicle size and zeta potenti…	2017	10.1016/j.ijpharm.2017.05.029	Article	English	93	Abdellatif M.M., Khalil I.A., Khalil M.A.F.	Scopus/Web of Science/PubMed
179	Antifungal and Ichthyotoxic Sesquiterpenoids from Santalum album Heartwood	In our continuing study on a survey of biologically active natural products from heartwood of Santalum album (Southwest Indian origin), we newly found potent fish toxic activity of an n-hexane soluble extract upon primary screening using killifish (medaka) and characterized α-santalol and β-santalol as the active components. The toxicity (median tolerance limit (TLm) after 24 h at 1.9 ppm) of α-s…	2017	10.3390/molecules22071139	Article	English	11	Kim T.H., Hatano T., Okamoto K., Yoshida T., Kanzaki H., Arita M., Ito H.	Scopus/Web of Science/PubMed
180	Variation in Metabolite Profiles of Amphibian Skin Bacterial Communities Across Elevations in the Neotropics	Both the structure and function of host-associated microbial communities are potentially impacted by environmental conditions, just as the outcomes of many free-living species interactions are context-dependent. Many amphibian populations have declined around the globe due to the fungal skin pathogen, Batrachochytrium dendrobatidis (Bd), but enivronmental conditions may influence disease dynamics…	2017	10.1007/s00248-017-0933-y	Article	English	19	Medina D., Hughey M.C., Becker M.H., Walke J.B., Umile T.P., Burzynski E.A., Iannetta A., Minbiole K.P.C., Belden L.K.	Scopus/Web of Science/PubMed
181	New perspectives on dandruff and seborrheic dermatitis: lessons we learned from bacterial and fungal skin microbiota	The human body is inhabited by complex microbial communities, which positively impact different aspects of our health, and might also be related to the development of diseases. Progress in technologies, particularly sequencing methods and bioinformatics tools, has been crucial for the advances in this field. Microbial communities from skin can modulate immune response and protect the host against…	2017	10.1684/ejd.2017.3038	Review	English	23	Paulino L.C.	Scopus/Web of Science/PubMed
182	Inactivation of dermatophyte infection by nonthermal plasma on animal model	Superficial fungal infections are a major epidemiological issue with increasing prevalence and are a common global problem. This article describes experimental therapy of superficial fungal skin infection using low-temperature plasma. Groups of guinea pigs were artificially infected with Trichophyton mentagrophytes SK 3286 dermatophyte and treated with plasma produced by a DC cometary discharge w…	2017	10.1093/mmy/myw094	Article	English	15	Scholtz V., Soušková H., Švarcová M., Kríha V., Živná H., Julák J.	Scopus/Web of Science/PubMed
183	Dermoscopy of superficial dermatomycosis	While mycological examinations, potassium hydroxide preparation, and fungus culture remain the gold standard for the diagnosis of superficial dermatomycoses, mycological procedures have limitations because they are rather complex, time-consuming, and require skilled personnel and additional mycological tools. Dermoscopy is a simple, non-invasive diagnostic technique that allows better visualizati…	2017	10.17966/kjmm.2017.22.2.53	Review	Korean	2	Park J.	Scopus
184	Diagnosis and treatment of dermatophytosis in dogs and cats.: Clinical Consensus Guidelines of the World Association for Veterinary Dermatology	Background: Dermatophytosis is a superficial fungal skin disease of cats and dogs. The most common pathogens of small animals belong to the genera Microsporum and Trichophyton. It is an important skin disease because it is contagious, infectious and can be transmitted to people. Objectives: The objective of this document is to review the existing literature and provide consensus recommendations f…	2017	10.1111/vde.12440	Review	English	137	Moriello K.A., Coyner K., Paterson S., Mignon B.	Scopus/Web of Science/PubMed
185	Effect of chitosan coating on microemulsion for effective dermal clotrimazole delivery	Clotrimazole (CTZ) is a broad spectrum antimycotic agent known to be very effective locally for the treatment of fungal skin infections. The aim of this study was to study the effect of chitosan-coated microemulsion (CME) for topical delivery of CTZ and also evaluate its in vitro antifungal efficacy, ex vivo permeation and retention ability on the skin surface. The pseudo-ternary phase diagrams w…	2017	10.1080/10837450.2016.1230629	Article	English	27	Kumari B., Kesavan K.	Scopus/Web of Science/PubMed
186	Effectiveness of topical skin products in the treatment and prevention of incontinence-associated dermatitis: A systematic review	EXECUTIVE SUMMARYBackground Incontinence-associated dermatitis (IAD) is inflammation of the skin resulting from repeated contact with urine and/or feces. It causes pain, redness, swelling and excoriation, and may lead to complications such as fungal skin infections and pressure injuries. It is important to prevent and treat IAD to avoid complications and improve patient outcomes. A number of prod…	2017	10.11124/jbisrir-2016-003015	Review	English	17	Pather P., Hines S., Kynoch K., Coyer F.	Scopus/PubMed
187	Epidemiology of skin infections in men's wrestling: Analysis of 2009-2010 through 2013-2014 National Collegiate Athletic Association surveillance data	Context: Our knowledge of the current epidemiology of skin infections among wrestlers is limited. Objective: To analyze and report the epidemiology of skin infections among National Collegiate Athletic Association (NCAA) men's wrestling student-athletes during the 2009-2010 through 2013-2014 academic years. Design: Descriptive epidemiology study. Setting: Aggregate skin infection and exposure dat…	2017	10.4085/1062-6050-52.2.16	Article	English	7	Herzog M.M., Fraser M.A., Register-Mihalik J.K., Kerr Z.Y.	Scopus/Web of Science/PubMed
188	Global skin disease morbidity and mortality an update from the global burden of disease study 2013	IMPORTANCE Disability secondary to skin conditions is substantial worldwide. The Global Burden of Disease Study 2013 includes estimates of global morbidity and mortality due to skin diseases. OBJECTIVE To measure the burden of skin diseases worldwide. DATA SOURCES For nonfatal estimates, data were found by literature search using PubMed and Google Scholar in English and Spanish for years 1980 thr…	2017	10.1001/jamadermatol.2016.5538	Article	English	333	Karimkhani C., Dellavalle R.P., Coffeng L.E., Flohr C., Hay R.J., Langan S.M., Nsoesie E.O., Ferrari A.J., Erskine H.E., Silverberg J.I., Vos T., Naghavi M.	Scopus/Web of Science/PubMed
189	Clinical and Laboratory Characteristics of a Tinea Capitis Outbreak Among Novice Buddhist Monks	Sixty novice Buddhist monks with tinea capitis confirmed according to clinical presentation and mycological laboratory finding were included in this study. Mixed-type clinical presentation was observed in approximately half of all cases, together with scarring alopecia (95%) and superficial fungal skin infection at locations other than the scalp (43.3%). The major isolated organism was Trichophyt…	2017	10.1111/pde.13102	Article	English	5	Bunyaratavej S., Leeyaphan C., Rujitharanawong C., Muanprasat C., Matthapan L.	Scopus/Web of Science/PubMed
190	Acousto-electronic gas sensor based on mushroom mycelial extracts	The main problem in the development of acousto-electronic gas sensors is the search for materials which are sensitive to the presence of different gases. For this purpose in this paper we suggest the use of piezoelectric quartz resonators coated by the mycelium-origin films of the mushroom Lentinula edodes strain F-249, which were cultivated in a synthetic medium. The extract of mycelium was depo…	2017	10.1016/j.snb.2016.12.011	Article	English	9	Kuznetsova I.Е., Zaitsev B.D., Shikhabudinov A.M., Tsivileva O.M., Pankratov A.N., Verona E.	Scopus/Web of Science
191	Premature ovarian failure could be an alarming sign of polyglandular autoimmune dysfunction	A 31-year-old lady, diagnosed to have premature ovarian failure in the gynecology clinic, was referred for endocrine assessment because of an abnormal thyroid function test. Clinical examination revealed hypotension, and fungal skin infection under her atrophic breasts. Thyroid stimulating hormone (TSH) level was very high. Assessment of the suprarenal function revealed evidence of Addison’s dise…	2017	10.1515/enr-2017-0011	Article	English	2	Saif A., Assem M.	Scopus/PubMed
192	Tinea versicolor mimicking pityriasis rubra pilaris caused by Malassezia globosa	Tinea versicolor (TV) is a common fungal skin disease caused by the Malassezia species. This disease usually presents as hypopigmented- or hyperpigmented coalescing scaly macules, papules, patches or plaques on the trunk and upper arms. Herein, we report a rare clinical manifestation of TV in a 29-year-old man presenting with marked follicular, erythematous, and hyperkeratotic papules on the trun…	2017	10.17966/kjmm.2017.22.1.28	Article	English	0	Bae S.H., Lee M.Y., Lee J.-B.	Scopus
193	The identification and grading of the psychosocial impact of Tinea capitis in primary school children in a semi-urban area of Rivers State, Nigeria	INTRODUCTION: Tinea capitis is a fungal skin disease, which is not life-threatening but could affect the psychosocial life of those suffering from it. Thus, this study sought to identify and grade the psychosocial impact related to Tinea capitis in primary school children. SUBJECTS AND METHODS: This was a cross-sectional study involving primary school children in Emohua Local Government Area of R…	2017	10.4103/npmj.npmj_172_16	Article	English	5	Fienemika A.E., Okeafor C.U.	Scopus/PubMed
194	Alternative and complementary medicine in treating fungal dermatophytic infections	Fungal skin infections caused by dermatophytes are a great menace and the existing medications possess several drawbacks, which overlay the way for seeking alternative and complementary medicine. Western Ghats is one of the hotspot of India and it is a rich source of flora and fauna. In this chapter, the medicinal plants, those are scientifically proved are accounted, the details of experimental …	2017	10.1201/9781315366487	Book Chapter	English	0	Sharanya M., Sathishkumar R.	Scopus
195	Cutaneous larva migrans in Turkey: An imported case report [Türkiye'de Kütanöz Larva Migrans Bir importe Olgu Sunumu]	Cutaneous larva migrans (CLM) is a parasitic infection most commonly found in tropical and subtropical areas. However, with the ease and increase of foreign travel to many countries around the world, the infection is not limited to these areas. CLM is an erythematous, serpiginous infection with skin eruption caused by percutaneous penetration of the larvae to the skin. In this report, a case diag…	2017	10.5578/mb.34189	Article	Turkish	3	Sönmezer M.C., Erdilmç S., Tulek N., Babur C., Buyukdemirci A., Ilgar T., Ertem G.	Scopus/Web of Science/PubMed
196	Prevalence and Factors Associated with Self-Medication in Dermatology in Togo	Objective. This study aimed to determine the prevalence of and factors associated with self-medication in dermatology in Lomé, Togo. Methods. We conducted an analytical cross-sectional study from February to April 2016 in 2 dermatology departments in Lomé. Univariate and multivariate logistic regression models were carried out to identify possible factors associated with self-medication. Results.…	2017	10.1155/2017/7521831	Article	English	3	Kombaté K., Técléssou J.N., Saka B., Akakpo A.S., Tchangai K.O., Mouhari-Toure A., Mahamadou G., Gnassingbé W., Abilogun-Chokki A., Pitché P.	Scopus/PubMed
197	A comparative study of the physicochemical properties and antimicrobial qualities of ABUAD moringa soap with conventional medicated soaps	The study was aimed at assessing the physicochemical properties and antimicrobial qualities of 'ABUAD moringa soap', a herbal soap produced with Moringa oleifera leaf by 'ABUAD Farm', Afe Babalola University, Ado Ekiti, Nigeria. The physicochemical properties and antimicrobial qualities of ABUAD moringa soap on some selected bacteria and fungi were evaluated and compared with those of some conven…	2017	10.5219/733	Article	English	0	Okiki P.A., Ojo A.A., Onyibe H., Oso O., Ajiboye B.O.	Scopus
198	Development of gel composition and technology based on pyrimidine substance	Background: This work was conducted in the framework of quality by design project involving the production of a pharmaceutical gel. Preliminary work included the identification of the quality target product profiles from historical values for previously laboratory batches, which were used to construct a D-optimal experimental design. Fungal disease of mycoses has long been known, since the days o…	2017	10.5455/njppp.2017.7.0518412062017	Article	English	0	Derbisbekova U.B., Datkhayev U.M., Rakhimov K.D., Zhuravel I.A., Makhatova B.G., Zabynbekova T.B.	Scopus
199	Fungal skin infections	• On the basis of strong evidence, tinea capitis is the most common fungal skin infection in children. (6)(7) • On the basis of strong evidence, treatment for tinea capitis must be systemic to penetrate the hair shafts. (17) • On the basis of consensus, diagnosis of fungal skin infections often can be confirmed through potassium hydroxide microscopy or a culture, although cultures are of limited …	2017	10.1542/pir.2015-0140	Article	English	9	Gupta A.K., MacLeod M.A., Foley K.A., Gupta G., Friedlander S.F.	Scopus/Web of Science/PubMed
200	Snake fungal disease: An emerging threat to wild snakes	Since 2006, there has been a marked increase in the number of reports of severe and often fatal fungal skin infections in wild snakes in the eastern USA. The emerging condition, referred to as snake fungal disease (SFD), was initially documented in rattlesnakes, where the infections were believed to pose a risk to the viability of affected populations. The disease is caused by Ophidiomyces ophiod…	2016	10.1098/rstb.2015.0457	Review	English	138	Lorch J.M., Knowles S., Lankton J.S., Michell K., Edwards J.L., Kapfer J.M., Staffen R.A., Wild E.R., Schmidt K.Z., Ballmann A.E., Blodgett D., Farrell T.M., Glorioso B.M., Last L.A., Price S.J., Schuler K.L., Smith C.E., Wellehan J.F.X., Jr., Blehert D.S.	Scopus/Web of Science/PubMed
201	Evaluation of wound healing property of Caesalpinia mimosoides Lam	Ethnopharmacological relevance Caesalpinia mimosoides Lam. is one of the important traditional folk medicinal plants in the treatment of skin diseases and wounds used by healers of Uttara Kannada district of Karnataka state (India). However scientific validation of documented traditional knowledge related to medicinal plants is an important path in current scenario to fulfill the increasing deman…	2016	10.1016/j.jep.2016.10.009	Article	English	22	Bhat P.B., Hegde S., Upadhya V., Hegde G.R., Habbu P.V., Mulgund G.S.	Scopus/Web of Science/PubMed
202	Epidemiology of onychomycosis in Crete, Greece: a 12-year study	Onychomycosis is a chronic fungal nail infection caused by dermatophytes, yeasts or non-dermatophyte moulds (NDMs). It occurs worldwide and accounts for about 50% of all nail disorders. The incidence of the disease and the prevalence of pathogens involved vary in different geographical areas and change with time. This study was undertaken to determine the epidemiology of onychomycosis in Crete, G…	2016	10.1111/myc.12533	Article	English	37	Maraki S., Mavromanolaki V.E.	Scopus/Web of Science/PubMed
203	In Vitro Antimicrobial Photodynamic Therapy Against Trichophyton mentagrophytes Using New Methylene Blue as the Photosensitizer	RESULTS: The minimum concentration of new methylene blue necessary to induce the death of all T. mentagrophytes cells in the initial suspension (approximate concentration, 106 colony forming units per milliliter) was 50μM for a fluence of 81J/cm2 after a contact time of 10minutes with the photosensitizing-agent. Increasing the concentration to 100μM allowed the fluence to be decreased to 9J/cm2.C…	2016	10.1016/j.ad.2016.06.004	Article	English; Spanish	0	López-Chicón P., Gulías Ò., Nonell S., Agut M.	Scopus/PubMed
204	In Vitro Antimicrobial Photodynamic Therapy Against Trichophyton mentagrophytes Using New Methylene Blue as the Photosensitizer [Terapia fotodinámica antimicrobiana in vitro aplicada sobre Trichophyton mentagrophytes con nuevo azul de metileno como fotosensibilizador]	Introduction and objectives Antimicrobial photodynamic therapy combines the use of a photosensitizing drug with light and oxygen to eradicate pathogens. Trichophyton mentagrophytes is a dermatophytic fungus able to invade the skin and keratinized tissues. We have investigated the use of new methylene blue as the photosensitizing agent for antimicrobial photodynamic therapy to produce the in vitro…	2016	10.1016/j.adengl.2016.08.001	Article	English; Spanish	8	López-Chicón P., Gulías Ò., Nonell S., Agut M.	Scopus
205	Protocol for the systematic review of the prevention, treatment and public health management of impetigo, scabies and fungal skin infections in resource-limited settings	Background: Impetigo, scabies, and fungal skin infections disproportionately affect populations in resource-limited settings. Evidence for standard treatment of skin infections predominantly stem from hospital-based studies in high-income countries. The evidence for treatment in resource-limited settings is less clear, as studies in these populations may lack randomisation and control groups for …	2016	10.1186/s13643-016-0335-0	Article	English	6	May P., Bowen A., Tong S., Steer A., Prince S., Andrews R., Currie B., Carapetis J.	Scopus/PubMed
206	Nano-sized technologies for miconazole skin delivery	Various nano-based strategies for increasing the efficiency of topical drugs have offered the potential advantage of miconazole skin delivery. Miconazole nitrate is an antifungal drug with a drawback of poor skin-penetration in the treatment of deep seated fungal skin infections. Drug entrapment in nanoparticles such as ethosome, liposomes, solid lipid nanoparticles (SLNs) and nano structured lip…	2016	10.2174/1389201017666160301102459	Article	English	15	Firooz A., Namdar R., Nafisi S., Maibach H.I.	Scopus/Web of Science/PubMed
207	Prevalence of sensitization to fungi in patients with respiratory allergy [Prevalencia de sensibilización a hongos en pacientes con alergia respiratoria]	BACKGROUND: As part of the etiology of respiratory allergy we have genetics, prenatal factors and sensitivity to various airborne allergens, between these fungi are found. Relationship has been found between sensitization to fungal in skin tests and allergy pathogenesis and aggravation. There is a few literature in Mexico and in the north of the country it is lacking regardingthis problem. OBJECT…	2016	10.29262/ram.v63i2.161	Article	Spanish	4	González-Díaz S.N., Arias-Cruz A., Ibarra-Chávez J.A., Elizondo-Villarreal B., Rivero-Arias D.M., Del Rocío Salinas-Díaz M.	Scopus/PubMed
208	Core content for undergraduate medical education in Spain: Recommendations of the instructors' group of the Spanish Academy of Dermatology and Venereology (AEDV) [Contenidos fundamentales de la Dermatología en el grado de medicina en España. Recomendaciones del grupo de profesores de la Academia Española de Dermatología y Venereología]	Background Skin problems are among the most frequent reasons for seeking medical attention in primary care. In recent years, as a result of the process of adapting medical curricula to the requirements of the European Higher Education Area, the amount of time students spend learning the concepts of dermatology has been reduced in many universities. Material and methods In order to reach a consens…	2016	10.1016/j.adengl.2015.09.025	Article	Spanish	0	Casanova J.M., Pujol R.M., Ferrándiz C., Betlloch I., Bosch R.J., Fernández V., Martí R.M., Requena L., Moreno J.C., Alegre V., Vilata J.J., Vilar N., Jaén P., Bielsa I., Querol I., Azón T., Borrego L., Mascaró J.M., Alsina M., Díaz R.M., Suarez R., García-Bustinduy M., García-Patos V., Estrach T., en representacion del grupo de profesores y docentes de la AEDV	Scopus
209	Filaggrin genotype and skin diseases independent of atopic dermatitis in childhood	Background: Filaggrin gene (FLG) mutations compromise skin barrier functions and increase risk of atopic dermatitis. We aimed to study effects on other skin diseases using unique data from the Danish registers. Methods: FLG genotyping of a population-based sample of 1547 children with extracted DNA and information on skin diseases from the Danish National Birth Cohort and Health Register, with 18…	2016	10.1111/pai.12511	Article	English	9	Bager P., Wohlfahrt J., Thyssen J.P., Melbye M.	Scopus/Web of Science/PubMed
210	Neutrophils	Neutrophils are essential components of the innate immune system. They participate in a variety of tissue reactions, including antimicrobial responses and damage repair. Neutrophils are exquisitely sensitive to migratory stimuli, which enables them to rapidly home into injured tissues, including the skin, where they exert their effector functions. The latter include the release of preformed media…	2016	10.1007/978-4-431-55855-2_9	Book Chapter	English	2	Jain R., Mitchell A.J., Tay S.S., Roediger B., Weninger W.	Scopus
211	Skin fungal community and its correlation with bacterial community of urban Chinese individuals	Background: High-throughput sequencing has led to increased insights into the human skin microbiome. Currently, the majority of skin microbiome investigations are limited to characterizing prokaryotic communities, and our understanding of the skin fungal community (mycobiome) is limited, more so for cohorts outside of the western hemisphere. Here, the skin mycobiome across healthy Chinese individ…	2016	10.1186/s40168-016-0192-z	Article	English	51	Leung M.H.Y., Chan K.C.K., Lee P.K.H.	Scopus/Web of Science/PubMed
212	Synthesis and characterization of silver nanoparticles using azadirachta indica leaf extract and their anti-fungal activity against malassezia species	Fungal skin infections are caused by different types of fungi among these Malassezia species is the common cause of the dermatitis in human and animals. In the present study, the skin scraping samples were collected from human and dog. The samples were inoculated into Saboraud and potato dextrose broth to achieve the fungal growth. The fungal species were isolated and characterized by colony morp…	2016	10.4028/www.scientific.net/jnanor.43.1	Article	English	0	Saranya S., Vijayarani K., Ramya K., Revathi K., Kumanan K.	Scopus/Web of Science
213	Evidence of 'sickness behaviour' in bats with white-nose syndrome	Many animals change behaviour in response to pathogenic infections. White-nose syndrome (WNS) is a fungal skin disease causing rapid declines of North American bats. Infection with Pseudogymnoascus destructans causes hibernating bats to arouse from torpor too often, potentially causing starvation. Mechanisms underlying increased arousals are not understood but fungal invasion of the wings could t…	2016	10.1163/1568539x-00003384	Article	English	20	Bohn S.J., Turner J.M., Warnecke L., Mayo C., McGuire L.P., Misra V., Bollinger T.K., Willis C.K.R.	Scopus/Web of Science
214	Fungal skin and soft tissue infections	Purpose of review: Cutaneous and subcutaneous mycoses are a source of significant morbidity both in immunocompetent and immunocompromised patients. We here review the latest findings in terms of genetic predisposition, epidemiology, clinical manifestations, and therapeutic strategies in these diseases. Recent findings: A growing number of fungal skin and soft tissue infections are reported worldw…	2016	10.1097/qco.0000000000000252	Review	English	21	Guégan S., Lanternier F., Rouzaud C., Dupin N., Lortholary O.	Scopus/Web of Science/PubMed
215	TaqMan real-time polymerase chain reaction for detection of Ophidiomyces ophiodiicola, the fungus associated with snake fungal disease	Background: Fungal skin infections associated with Ophidiomyces ophiodiicola, a member of the Chrysosporium anamorph of Nannizziopsis vriesii (CANV) complex, have been linked to an increasing number of cases of snake fungal disease (SFD) in captive snakes around the world and in wild snake populations in eastern North America. The emergence of SFD in both captive and wild situations has led to an…	2015	10.1186/s12917-015-0407-8	Article	English	41	Bohuski E., Lorch J.M., Griffin K.M., Blehert D.S.	Scopus/Web of Science/PubMed
216	Diagnosing common skin diseases using soft computing techniques	In today’s word skin diseases and lesions have become one among the most common diseases that people suffer across various age groups. Typical skin illnesses that people suffer throughout the world and more particularly in developing countries are Bacterial Skin infections, Fungal skin infection, Eczema and Scabies. Identification of the influential clinical symptoms that help in the diagnosis of…	2015	10.14257/ijbsbt.2015.7.6.28	Article	English	6	Parikh K.S., Shah T.P., Kota R.K., Vora R.	Scopus
217	Disulphide-reduced psoriasin is a human apoptosisinducing broad-spectrum fungicide	The unexpected resistance of psoriasis lesions to fungal infections suggests local production of an antifungal factor. We purified Trichophyton rubrum-inhibiting activity from lesional psoriasis scale extracts and identified the Cys-reduced form of S100A7/psoriasin (redS100A7) as a principal antifungal factor. redS100A7 inhibits various filamentous fungi, including the mold Aspergillus fumigatus,…	2015	10.1073/pnas.1511197112	Article	English	64	Hein K.Z., Takahashi H., Tsumori T., Yasui Y., Nanjoh Y., Toga T., Wu Z., Grötzinger J., Jung S., Wehkamp J., Schroeder B.O., Schroeder J.M., Morita E.	Scopus/Web of Science/PubMed
218	In vitro model of infected stratum corneum for the efficacy evaluation of poloxamer 407-based formulations of ciclopirox olamine against Trichophyton rubrum as well as differential scanning calorimetry and stability studies	Superficial fungal skin infections are a common disease and concern 20-25% of the world's population with the dermatophyte Trichophyton rubrum being the main trigger. Due to autoinoculation, fungal skin infections of the feet (tinea pedis) often occur simultaneously with fungal nail infections (onychomycosis). Therefore, the overall objective was the development and characterisation of poloxamer …	2015	10.1016/j.ijpharm.2015.08.023	Article	English	9	Täuber A., Müller-Goymann C.C.	Scopus/Web of Science/PubMed
219	Simultaneous Topical Antifungal Skin and Nail Therapy: A Prospective Treatment Option?	Superficial fungal infections affect 20-25% of the world's population with an increasing trend. Common infections are fungal skin and nail diseases (tinea pedis and onychomycosis, respectively), which often occur simultaneously due to autoinoculation. Tinea pedis is mostly provoked by the dermatophyte fungus Trichophyton rubrum, which remains in the outermost skin layer, the stratum corneum (SC).…	2015	10.1055/s-0034-1392775	Review	English	0	Täuber A., Müller-Goymann C.	Scopus
220	Estimated burden of fungal infections in Germany	In the late 1980's, the incidence of invasive fungal diseases (IFDs) in Germany was estimated with 36.000 IFDs per year. The current number of fungal infections (FI) occurring each year in Germany is still not known. In the actual analysis, data on incidence of fungal infections in various patients groups at risk for FI were calculated and mostly estimated from various (mostly national) resources…	2015	10.1111/myc.12392	Article	English	34	Ruhnke M., Groll A.H., Mayser P., Ullmann A.J., Mendling W., Hof H., Denning D.W., The University of Manchester in association with the LIFE program	Scopus/Web of Science/PubMed
221	Comparing cutaneous research funded by the US National Institutes of Health (NIH) with the US skin disease burden	Background Disease burden should be an important component for guiding research funding. Objective We sought to examine the relationship between dermatologic research funded from 2012 to 2013 by the National Institutes of Health (NIH) and US skin disease burden as measured by disability-adjusted life years in the Global Burden of Disease 2010 study. Methods A cross-sectional analysis was independ…	2015	10.1016/j.jaad.2015.04.039	Article	English	27	Hagstrom E.L., Patel S., Karimkhani C., Boyers L.N., Williams H.C., Hay R.J., Weinstock M.A., Armstrong A.W., Dunnick C.A., Margolis D.J., Dellavalle R.P.	Scopus/Web of Science/PubMed
222	A survey of self-reported skin disease in the elderly African-American population	Background: In the USA, the geriatric population, almost 12% of which will be comprised of African-Americans, is expected to exceed 88 million by 2050. Data on dermatologic conditions in elderly African-Americans are deficient. Objectives: This study aimed to identify prevalences of self-reported skin disease and skin-related concerns in elderly African-Americans, and to assess participants' perc…	2015	10.1111/ijd.12520	Article	English	12	Caretti K.L., Mehregan D.R., Mehregan D.A.	Scopus/Web of Science/PubMed
223	Wax ester analysis of bats suffering from white nose syndrome in Europe	The composition of wax esters (WE) in the fur of adult greater mouse-eared bats (Myotis myotis), either healthy or suffering from white nose syndrome (WNS) caused by the psychrophilic fungus Pseudogymnoascus destructans, was investigated by high-resolution mass spectrometry analysis in the positive ion mode. Profiling of lipid classes showed that WE are the most abundant lipid class, followed by …	2015	10.1007/s11745-015-4027-7	Article	English	5	Řezanka T., Viden I., Nováková A., Bandouchová H., Sigler K.	Scopus/Web of Science
224	Slow release anti-fungal skin formulations based on citric acid intercalated layered double hydroxides nanohybrids	Background: During the past few decades, the occurrence of superficial fungal infections has rapidly increased. As the fungal infections take longer time to get cured, concepts such as designing drugs with extended persistence and controlled release have gained attention. In this context, nanotechnology has been identified as the latest technological revolution which has opened up new pathways fo…	2015	10.1186/s13065-015-0106-3	Article	English	27	Perera J., Weerasekera M., Kottegoda N.	Scopus/Web of Science/PubMed
225	Onychomycosis: A study of self-recognition by patients and quality of life	Background: Onychomycosis accounts for approximately half of all nail disorders and is usually asymptomatic. Objectives: To evaluate patients' recognition of fungal nail disease, concomitant fungal skin diseases, complications, and quality of life. Methods: Patients from the fungal nail clinic were enrolled between May 2011 and April 2012. Patients' awareness of diseased nails was evaluated and t…	2015	10.4103/0378-6323.154796	Article	English	16	Bunyaratavej S., Pattanaprichakul P., Leeyaphan C., Chayangsu O., Bunyaratavej S., Kulthanan K.	Scopus/Web of Science/PubMed
226	Bacteria isolated from bats inhibit the growth of Pseudogymnoascus destructans, the causative agent of white-nose syndrome	Emerging infectious diseases are a key threat to wildlife. Several fungal skin pathogens have recently emerged and caused widespread mortality in several vertebrate groups, including amphibians, bats, rattlesnakes and humans. White-nose syndrome, caused by the fungal skin pathogen Pseudogymnoascus destructans, threatens several hibernating bat species with extinction and there are few effective t…	2015	10.1371/journal.pone.0121329	Article	English	98	Hoyt J.R., Cheng T.L., Langwig K.E., Hee M.M., Frick W.F., Kilpatrick A.M.	Scopus/Web of Science/PubMed
227	Antifungal activity of 40 TCMs used individually and in combination for treatment of superficial fungal infections	Ethnopharmacological relevance A series of 40 important Traditional Chinese Medicines (TCMs), which were reported effective in treating superficial fungal infections of the skin in Chinese clinical trial publications and Chinese Herbal Classics, were chosen for the investigation of the individual and combination antifungal properties against 8 superficial fungal strains in vitro. Materials and me…	2015	10.1016/j.jep.2015.01.025	Article	English	12	Yang F., Ding S., Liu W., Liu J., Zhang W., Zhao Q., Ma X.	Scopus/Web of Science/PubMed
228	Occidioidomycosis	Coccidioidomycos (CM) is a fungal infection caused by the endemic thermal dysmorphic fungal genus Coccidioides. The illness is usually acquired in the southwestern USA and adjacent areas of Mexico. Primary infection is virtually always pneumonic disease. Disseminated disease may occur in individuals with antecedent pulmonary disease or as a presenting manifestation. Dissemination can occur to any…	2015	10.1007/9783319130903_17	Book Chapter	English	1	Johnson R.H., Heidari A.	Scopus
229	Clinicopathological evaluation of non-parasitic dermatoses in canines	Aim: The present study has been carried out to detect non-parasitic dermatoses in canines brought at the Nandini Veterinary Hospital, Surat. Materials and Methods: The current investigation was carried out on skin scrapping, skin biopsy specimens, blood, and serum samples of 210 freshly registered cases of dogs with dermatological afflictions. Dogs found healthy on clinical examination were used …	2015	10.14202/vetworld.2015.1346-1350	Article	English	1	Sindha M.J., Trangadia B.J., Vihol P.D., Parmar R.S., Patel B.V.	Scopus/PubMed
230	Updating the epidemiology of dermatophyte infections in Palestine with special reference to concomitant dermatophytosis	Objective. - To determine the epidemiology of dermatophytosis in Palestinian patients, detect changes in the etiological agents during the last three decades, and to correlate between concomitant tinea pedis infections, and other cutaneous lesions. Materials and methods 220 suspected dermatophytosis patients were involved in this study. In an additional 38 cases, where consultation was prompted b…	2015	10.1016/j.mycmed.2015.02.046	Article	English	16	Ali-Shtayeh M.S., Yaish S., Jamous R.M., Arda H., Husein E.I.	Scopus/Web of Science/PubMed
231	Candida krusei dermatomycoses simulating cutaneous herpes [Dermatomicosis por Candida krusei simulando herpes cutáneo]	Fungal skin infections are usually caused by zoofilic or antropophilic dermatophytes with ability for colonizing keratinized tissues (skin, hair, nails).They are generally called tinea and are classified topographically using the Latin genitive mode (corporis, capitis, unguis, manus, pedis). Tinea faciei is a variety of the corporis type where only face is affected. The genus Candida does not bel…	2015	10.4321/s1139-76322015000100013	Article	Spanish	2	Sanz Santaeufemia F.J., García Talavera M.E., González I.G., Del Río R.G.	Scopus
232	Dermatological problems following spinal cord injury in Korean patients	Objective: To identify dermatological conditions following spinal cord injury (SCI) and analyze these conditions in relation to various characteristics of SCI. Design: Retrospective chart review. Setting: National Health Insurance Corporation Ilsan Hospital of Korea, Rehabilitation Center, Spinal Cord Unit. Participants: Patients treated for SCI who were referred to dermatology for dermatological…	2015	10.1179/2045772313y.0000000154	Conference Paper	English	8	Han Z.-A., Choi J.Y., Ko Y.J.	Scopus/Web of Science/PubMed
233	The fungus Trichophyton redellii sp. nov. causes skin infections that resemble white-nose syndrome of hibernating bats	Before the discovery of white-nose syndrome (WNS), a fungal disease caused by Pseudogymnoascus destructans, there were no reports of fungal skin infections in bats during hibernation. In 2011, bats with grossly visible fungal skin infections similar in appearance to WNS were reported from multiple sites in Wisconsin, US, a state outside the known range of P. destructans and WNS at that time. Tape…	2015	10.7589/2014-05-134	Article	English	37	Lorch J.M., Minnis A.M., Meteyer C.U., Redell J.A., Paul White J., Kaarakka H.M., Muller L.K., Lindner D.L., Verant M.L., Shearn-Bochsler V., Blehert D.S.	Scopus/Web of Science/PubMed
234	Successful treatment of gastrointestinal basidiobolomycosis with voriconazole without surgical intervention	Basidiobolomycosis is a rare disease due to fungus Basidiobolus ranarum, an environmental saprophyte that is found worldwide, though mainly reported in the tropical and subtropical regions. Basidiobolomycosis is an unusual fungal skin infection, rarely involves the gastrointestinal (GI) tract. Most of the cases of paediatric GI basidiobolomycosis (GIB) were reported from the southern region of Sa…	2014	10.1093/tropej/fmu047	Article	English	22	Albaradi B.A., Babiker A.M.I., Al-Qahtani H.S.	Scopus/Web of Science/PubMed
235	Short-term global health education programs abroad: Disease patterns observed in Haitian migrant worker communities around la Romana, Dominican Republic	The possibility of encountering rare tropical disease presentations is commonly described as a benefit derived by developed world medical trainees participating in clinical service-oriented short-term global health experiences in the developing world. This study describes the health status of a population served by a short-term experience conducted by a North American institute, and the results o…	2014	10.4269/ajtmh.14-0012	Article	English	10	Ferrara B.J., Townsley E., MacKay C.R., Lin H.C., Loh L.C.	Scopus/Web of Science/PubMed
236	Baseline cutaneous bacteria of free-living New Zealand native frogs (leiopelma archeyi and leiopelma hochstetteri) and implications for their role in defense against the amphibian chytrid (Batrachochytrium dendrobatidis)	Knowledge of baseline cutaneous bacterial microbiota may be useful in interpreting diagnostic cultures from captive sick frogs and as part of quarantine or pretranslocation disease screening. Bacteria may also be an important part of innate immunity against chytridiomycosis, a fungal skin disease caused by Batrachochytrium dendrobatidis (Bd). In February 2009, 92 distinct bacterial isolates from …	2014	10.7589/2013-07-186	Article	English	7	Shaw S.D., Berger L., Bell S., Dodd S., James T.Y., Skerratt L.F., Bishop P.J., Speare R.	Scopus/Web of Science/PubMed
237	Multiple erythema lesions obscured As fungal skin infection	Erythema migrans is a ring like erythema, with a few centimeters in diameter. Usually it occur solitary, days to weeks after an infected tick bite. According to skin changes it can be manifested acutely such as erythema migrans in Lyme Borreliosis, borrelial lymphocytoma (subacute), or as a late Lyme disease with acrodermatitis chronica atrophicans. All stages of this disease can be treatable wit…	2014	10.3889/mjms.1857-5773.2014.0417	Article	English	0	Koçinaj A., Gërçari A., Ferizi M., Lashi E., Gjunkshi L., Fida M.	Scopus
238	Global burden of skin disease as reflected in Cochrane Database of Systematic Reviews	MAIN OUTCOMES AND MEASURES Relationship of CDSR topic coverage (systematic reviews and protocols) with percentage of total 2010 DALYs, 2010 DALY rank, and DALY percentage change from 1990 to 2010 for 15 skin conditions.RESULTS All 15 skin conditions were represented by at least 1 systematic review in CDSR; 69% of systematic reviews and 67%of protocols by the CSG covered the 15 skin conditions. Co…	2014	10.1001/jamadermatol.2014.709	Article	English	75	Karimkhani C., Boyers L.N., Prescott L., Welch V., Delamere F.M., Nasser M., Zaveri A., Hay R.J., Vos T., Murray C.J.L., Margolis D.J., Hilton J., MacLehose H., Williams H.C., Dellavalle R.P.	Scopus/Web of Science/PubMed
239	The Many Faces of the Hyper-IgE Syndrome	The classic form of hyper-IgE syndrome (HIES), first published as Job syndrome in 1966, describes patients with recurrent "cold" staphylococcal boils, pneumonias and elevated levels of serum IgE. Autosomal dominant (AD) inheritance and multisystem involvement was soon recognized; in addition to recurrent staphylococcal and fungal skin and lung infections, patients suffer from eczema, pneumatocele…	2014	10.1016/b978-0-12-407179-7.00019-9	Book Chapter	English	1	Engelhardt K.R., Grimbacher B.	Scopus
240	Topical antifungal treatments for tinea cruris and tinea corporis	Background: Tinea infections are fungal infections of the skin caused by dermatophytes. It is estimated that 10% to 20% of the world population is affected by fungal skin infections. Sites of infection vary according to geographical location, the organism involved, and environmental and cultural differences. Both tinea corporis, also referred to as 'ringworm' and tinea cruris or 'jock itch' are c…	2014	10.1002/14651858.cd009992.pub2	Review	English	68	El-Gohary M., van Zuuren E.J., Fedorowicz Z., Burgess H., Doney L., Stuart B., Moore M., Little P.	Scopus/Web of Science/PubMed
241	A case of fungal keratitis and onychomycosis simultaneously infected by Trichophyton species	Background: Fungal keratitis is difficult to treat that can result in corneal blindness requiring penetrating keratoplasty and in fungal endothalmitis. We report a case of fungal keratitis and onychomycosis simultaneously infected by Trichophyton. Case presentation. A 77-year old male presented with ocular pain, conjunctival injection, and severe loss of vision in his left eye. His best corrected…	2014	10.1186/1471-2415-14-90	Article	English	4	Jin K.W., Jeon H.S., Hyon J.Y., Wee W.R., Suh W., Shin Y.J.	Scopus/Web of Science/PubMed
242	Comparing cutaneous research funded by the National Institute of Arthritis and Musculoskeletal and Skin Diseases with 2010 global burden of disease results	Importance: Disease burden data helps guide research prioritization. Objective: To determine the extent to which grants issued by the National Institute of Arthritis and Musculoskeletal and Skin Diseases (NIAMS) reflect disease burden, measured by disability-adjusted life years (DALYs) from Global Burden of Disease (GBD) 2010 project. Design: Two investigators independently assessed 15 skin condi…	2014	10.1371/journal.pone.0102122	Article	English	25	Karimkhani C., Boyers L.N., Margolis D.J., Naghavi M., Hay R.J., Williams H.C., Naldi L., Coffeng L.E., Weinstock M.A., Dunnick C.A., Pederson H., Vos T., Murray C.J.L., Dellavalle R.P.	Scopus/Web of Science/PubMed
243	Fungal engagement of the C-type lectin mincle suppresses dectin-1-induced antifungal immunity	Recognition of fungal pathogens by C-type lectin receptor (CLR) dectin-1 on human dendritic cells is essential for triggering protective antifungal TH1 and TH17 immune responses. We show that Fonsecaea monophora, a causative agent of chromoblastomycosis, a chronic fungal skin infection, evades these antifungal responses by engaging CLR mincle and suppressing IL-12, which drives TH1 differentiatio…	2014	10.1016/j.chom.2014.03.008	Article	English	109	Wevers B.A., Kaptein T.M., Zijlstra-Willems E.M., Theelen B., Boekhout T., Geijtenbeek T.B.H., Gringhuis S.I.	Scopus/Web of Science/PubMed
244	Efficacy and safety of 1 % terbinafine film-forming solution in Chinese patients with tinea pedis: A randomized, double-blind, placebo-controlled, multicenter, parallel-group study	Background and objectives: Superficial fungal skin infections are treated using topical antifungals. The aim of this study was to demonstrate the efficacy of a single application of 1 % terbinafine film-forming solution (FFS) versus placebo for the treatment of tinea pedis in the Chinese population. Methods: Six centers in China randomized 290 patients in a 1:1 ratio to receive either 1 % terbina…	2014	10.1007/s40261-014-0171-8	Article	English	5	Li R.Y., Wang A.P., Xu J.H., Xi L.Y., Fu M.H., Zhu M., Xu M.L., Li X.Q., Lai W., Liu W.D., Lu X.Y., Gong Z.Q.	Scopus/Web of Science/PubMed
245	Antifungal effect of TONS504-photodynamic therapy on Malassezia furfur	Numerous reports indicate therapeutic efficacy of photodynamic therapy (PDT) against skin tumors, acne and for skin rejuvenation. However, few reports exist regarding its efficacy for fungal skin diseases. In order to determine the antifungal effect, PDT was applied on Malassezia furfur. M. furfur was cultured in the presence of a novel cationic photosensitizer, TONS504, and was irradiated with a…	2014	10.1111/1346-8138.12615	Article	English	11	Takahashi H., Nakajima S., Sakata I., Iizuka H.	Scopus/Web of Science/PubMed
246	LED bio-friendly development of fungal skin treatment device	The purpose of this work was to examine which LED fungal treatment device can be applied to the face. Several methods were used for that purpose. More specifically, 240 50mA low-power LED chips were selected. As a result, a light distribution angle of 150 degrees was possible, and the temperature could be adjusted in the range of 27-32 degrees for fungal treatment (acne), making the device suitab…	2014	10.14257/ijmue.2014.9.9.22	Article	English	0	Eo I.-S.	Scopus
247	The characteristics of New Zealand rabbit model for infection with pathogens of fungal skin disease in Asian elephants in Chongqing Zoo	Asian elephants in Chongqing zoo were repeatedly affected by fungal skin disease recent years. This study sought to establish New Zealand rabbit models infected with Microsporum canis which was pathogens of fungal skin disease developed in Asian elephants in Chongqing zoo. Bacterial colonies were incubated in Sabouraud dextrose agar at 28 ° C for 14 days and then prepared into bacterial suspensio…	2014	10.3923/javaa.2014.917.921	Article	English	1	Qiao X., Wei L., Yang Y., Chen J., Wu D., Mi B., Luo W., Yin S., Yang J.	Scopus
248	Analysis of dermatologic problems in geriatric patients [Geriatrik hastalarda dermatolojik sorunlarin analizi]	Objective: All over the world, the proportion of elderly in general population tends to increase. Epidemiological studies concerning this part of the population will be guiding while planning health services. Methods: Data of a total of 2734 geriatric patients admitted between the years 2005-2013 were analyzed. Hospital-based patient registry records were used for data collection. Patients were c…	2014	10.4274/tdd.1905	Article	English; Turkish	10	Baş Y., Kalkan G., Seçkin H.Y., Takci Z., Sahin Ş., Demir A.K.	Scopus
249	Dermatomycoses: Challenges and human immune responses	The most prevalent skin infections are mainly caused by species of dermatophytes of the genera Trichophyton, Microsporum, and Epidermophyton that infect keratinized tissues and stratum corneum of skin and hair. Besides proteases with putative role of kinases and other enzymes, immune modulators are abundantly secreted during infection as well. The molecular mechanism used by the dermatophytes to …	2014	10.2174/1389203715666140512121349	Article	English	14	Zahur M., Afroz A., Rashid U., Khaliq S.	Scopus/Web of Science/PubMed
250	Identification and characterization of dermatophyte species and strains with PCR amplification	The aim of the present study was to use two polymerase chain reaction (PCR) methods, with (GACA)4 and non-transcribed spacer (NTS) as primers, to identify and characterize dermatophyte isolates from dogs and cats to a species and strain level. A total of 45 isolates from nine dermatophyte species were collected from pet dogs and cats and subjected to PCR amplification with the microsatellite prim…	2014	10.3892/etm.2014.1785	Article	English	5	Liu G., He C., Zhang H.	Scopus/Web of Science/PubMed
251	The global burden of skin disease in 2010: An analysis of the prevalence and impact of skin conditions	The Global Burden of Disease (GBD) Study 2010 estimated the GBD attributable to 15 categories of skin disease from 1990 to 2010 for 187 countries. For each of the following diseases, we performed systematic literature reviews and analyzed resulting data: eczema, psoriasis, acne vulgaris, pruritus, alopecia areata, decubitus ulcer, urticaria, scabies, fungal skin diseases, impetigo, abscess, and o…	2014	10.1038/jid.2013.446	Article	English	828	Hay R.J., Johns N.E., Williams H.C., Bolliger I.W., Dellavalle R.P., Margolis D.J., Marks R., Naldi L., Weinstock M.A., Wulf S.K., Michaud C., J.l. Murray C., Naghavi M.	Scopus/Web of Science/PubMed
252	Cutaneous fungal infection in a neonatal intensive care unit patient: A case report and literature review	Fungal skin infections are not uncommon in healthy, premature or immunocompromised newborns. Healthy neonates usually develop fungal skin infections caused by dermatophytes, Candida and Malassezia species, whereas immunocompromised neonates are more susceptible to skin infections with opportunistic pathogens (Aspergilus, Zygomycetes). Therefore neonatal fungal skin infections can range from gener…	2014	10.1111/pde.12323	Review	English	2	Kucinskiene V., Sutkute A., Valiukeviciene S.	Scopus/Web of Science/PubMed
253	Synthesis, characterization and biological activities of curcumin nanospheres	Curcumin is one of the most versatile compounds obtained from Curcuma longa. The major obstacle in the therapeutic use of curcumin is its aqueous solubility. To enhance its aqueous solubility and biological activities, we prepared curcumin nanospheres (CNSs) by wet milling-solvent evaporation technique without any surfactants. In this study, we have focused on the synthesis, characterization and …	2014	10.1166/jbn.2014.1786	Article	English	32	Arunraj T.R., Rejinold N.S., Mangalathillam S., Saroj S., Biswas R., Jayakumar R.	Scopus/Web of Science/PubMed
254	The impact of human immunodeficiency virus-related diseases on pigmented skin types	Infection with human immunodeficiency virus (HIV) remains a significant problem globally. Early diagnosis and treatment with antiretroviral drugs has considerably improved health outcomes and decreased disease-related morbidity. HIV infection is associated with a wide range of skin disorders enabling dermatologists to diagnose HIV as well as associated opportunistic infections early in the course…	2013	10.1111/bjd.12527	Review	English	1	Ameen M.	Scopus
255	The altered landscape of the human skin microbiome in patients with primary immunodeficiencies	While landmark studies have shown that microbiota activate and educate host immunity, how immune systems shape microbiomes and contribute to disease is incompletely characterized. Primary immunodeficiency (PID) patients suffer recurrent microbial infections, providing a unique opportunity to address this issue. To investigate the potential influence of host immunity on the skin microbiome, we exa…	2013	10.1101/gr.159467.113	Article	English	186	Oh J., Freeman A.F., Park M., Sokolic R., Candotti F., Holland S.M., Segre J.A., Kong H.H.	Scopus/Web of Science/PubMed
256	Dermatologic Manifestations of Diabetes Mellitus. A Review	Diabetes mellitus affects every organ of the body including the skin. Certain skin manifestations of diabetes are considered cutaneous markers of the disease, whereas others are nonspecific conditions that occur more frequently among individuals with diabetes compared with the general population. Diabetic patients have an increased susceptibility to some bacterial and fungal skin infections, whic…	2013	10.1016/j.ecl.2013.07.004	Review	English	49	Murphy-Chutorian B., Han G., Cohen S.R.	Scopus/Web of Science/PubMed
257	Evaluation of the immune response to T. Verrucosum vaccines	Dermatophytosis is considered as one of the most important fungal skin disease affecting both humans and animals otherwise its importance as zoonotic disease. Treatment of ringworm in cattle is expensive and time consuming especially on herd level. Vaccination can be a giant step forward to prevent the occurrence of mycozoonosis between the affected animals with ringworm and susceptible man. Fift…	2013	10.3844/ajisp.2013.139.147	Article	English	4	Zahran R.N., Attia Abdeen E.	Scopus
258	Flood-related skin diseases: A literature review	Flood is one of the most common natural disasters, which commonly occurs in all parts of the world. The effects of the disasters considerably become enormous problems to overall public health systems. Flood-related skin diseases are a portion of these consequences presenting with cutaneous manifestations and/or signs of systemic illnesses. We conducted a systematic literature review of research p…	2013	10.1111/ijd.12064	Review	English	27	Tempark T., Lueangarun S., Chatproedprai S., Wananukul S.	Scopus
259	The Role of L-DOPA on Melanization and Mycelial Production in Malassezia Furfur	Melanins are synthesized by organisms of all biological kingdoms and comprise a heterogeneous class of natural pigments. Certain of these polymers have been implicated in the pathogenesis of several important human fungal pathogens. This study investigated whether the fungal skin pathogen Malassezia furfur produces melanin or melanin-like compounds. A melanin-binding monoclonal antibody (MAb) lab…	2013	10.1371/journal.pone.0063764	Article	English	21	Youngchim S., Nosanchuk J.D., Pornsuwan S., Kajiwara S., Vanittanakom N.	Scopus/Web of Science/PubMed
260	Topographic diversity of fungal and bacterial communities in human skin	Traditional culture-based methods have incompletely defined the microbial landscape of common recalcitrant human fungal skin diseases, including athlete's foot and toenail infections. Skin protects humans from invasion by pathogenic microorganisms and provides a home for diverse commensal microbiota. Bacterial genomic sequence data have generated novel hypotheses about species and community struc…	2013	10.1038/nature12171	Article	English	760	Findley K., Oh J., Yang J., Conlan S., Deming C., Meyer J.A., Schoenfeld D., Nomicos E., Park M., Becker J., Benjamin B., Blakesley R., Bouffard G., Brooks S., Coleman H., Dekhtyar M., Gregory M., Guan X., Gupta J., Han J., Hargrove A., Ho S.-L., Johnson T., Legaspi R., Lovett S., Maduro Q., Masiello C., Maskeri B., McDowell J., Montemayor C., Mullikin J., Riebow N., Schandler K., Schmidt B., Sis…	Scopus/Web of Science/PubMed
261	Development of solid lipid nanoparticles based controlled release system for topical delivery of terbinafine hydrochloride	The study describes the development and evaluation of solid lipid nanoparticles (SLNs) of terbinafine hydrochloride (TH) for sustained release and skin targeting. TH-loaded SLNs were prepared by solvent-injection technique and optimized using 33 full-factorial design. Effect of drug:lipid ratio, surfactant concentration and volume of organic solvent were studied on % entrapment efficiency (%EE) a…	2013	10.1016/j.ejps.2013.03.013	Article	English	132	Vaghasiya H., Kumar A., Sawant K.	Scopus/Web of Science/PubMed
262	Computer-aided diagnosis (CAD) of the skin disease based on an intelligent classification of sonogram using neural network	Today skin diseases and lesions are the most common diseases that people suffer in different age groups, such as eczema, scalp ringworm, skin fungal, skin cancer of different intensity (basal cell carcinoma and squamous cell carcinoma and melanoma...), diabetic ulcers, and etc. There are different ways to evaluate and diagnose mentioned diseases. For example, most dermatologists prescribe the bio…	2013	10.1007/s00521-012-0864-y	Article	English	15	Kia S., Setayeshi S., Shamsaei M., Kia M.	Scopus/Web of Science
263	Isoconazole nitrate: A unique broad-spectrum antimicrobial azole effective in the treatment of dermatomycoses, both as monotherapy and in combination with corticosteroids	Fungal skin infections, or dermatomycoses, are associated with a broad range of pathogens. Involvement of gram-positive bacteria is often suspected in dermatomycoses. Inflammation plays an important role in dermatomycoses, displaying a close association between frequent inflammation and reduced skin-related quality of life. Isoconazole nitrate (ISN) is a broad-spectrum antimicrobial agent with a …	2013	10.1111/myc.12054	Review	English	19	Veraldi S.	Scopus/Web of Science/PubMed
264	The perceptions of parents about the skin conditions of their children presenting with comorbid fungal skin infections in Francistown, Botswana	Background: In 2006, about 50% of the children whose parents brought them to the Francistown City Council clinics in Botswana for consultation had fungal skin infections. Most of these parents did not include the fungal skin conditions in the list of presenting complaints. Objective: To explore the perceptions of the parents about the fungal skin conditions of their children. Method: Eight partic…	2013	10.4102/phcfm.v5i1.459	Article	English	2	Ifebuzor D.C., Mabuza L.H., Malete N.H., Govender I.	Scopus
265	Robert Remak (1815-1865): Discoverer of the fungal character of dermatophytoses	Robert Remak was the first scientist to undertake successful research on fungal skin infections. A neurologist, physiologist, and embryologist, Remak was the first to observe the fungal changes causing the disease of favus; however, he gave credit for the discovery to Professor Johann Schönlein and denied all attempts by others to credit him with the discovery by calling them a mistake. He named …	2013	10.1016/j.clindermatol.2012.11.002	Article	English	3	Grzybowski A., Pietrzak K.	Scopus/Web of Science/PubMed
266	Dermatological conditions in military conscripts	Background Published studies regarding skin conditions in the military are mainly cross-sectional studies from clinical encounters during war campaigns and military training. Aims To determine the incidence and spectrum of dermatological conditions in a cohort of military conscripts in Singapore. Soldiers diagnosed with contact dermatitis (CD) were further analysed for body area involvement, poss…	2013	10.1093/occmed/kqt077	Article	English	6	Gan W.H., Low R., Koh D.	Scopus/Web of Science/PubMed
267	Generalized chromomycosis caused by Phialophora verrucosa [Chromomycose cutanée diffuse à Phialophora verrucosa]	Background.- Chromomycosis is a chronic fungal skin infection that generally presents in the form of verrucous or vegetative lesions on uncovered areas of skin. We report an unusual case of generalised chromomycosis due to Phialophora verrucosa. Patients and methods.- A 42-year-old town-dwelling housewife was hospitalised for erythematous keratotic nodules on the arm showing sporotrichoid distrib…	2013	10.1016/j.annder.2012.10.605	Article	French	6	Radouane N., Hali F., Khadir K., Soussi M., Ouakadi A., Marouane S., Zamiati S., Benchikhi H.	Scopus/Web of Science/PubMed
268	Evaluation of novel nystatin nanoemulsion for skin candidosis infections	One of the most common fungal skin infections is candidosis. Topical application of drugs at the pathological sites offers potential advantage of direct drug delivery to the site of action. The main aim of this work was to evaluate an optimal nystatin nanoemulsion for topical application avoiding undesirable side effects as systemic absorption and toxicity. Surface morphology and droplet size dis…	2013	10.1111/j.1439-0507.2012.02202.x	Article	English	64	Fernández-Campos F., Clares Naveros B., López Serrano O., Alonso Merino C., Calpena Campmany A.C.	Scopus/Web of Science/PubMed
269	Immune evasion or avoidance: Fungal skin infection linked to reduced defence peptides in Australian green-eyed treefrogs, Litoria serrata	Many parasites and pathogens suppress host immunity to maintain infection or initiate disease. On the skin of many amphibians, defensive peptides are active against the fungus Batrachochytrium dendrobatidis (Bd), the causative agent of the emerging infectious disease chytridiomycosis. We tested the hypothesis that infection with the fungus may be linked to lower levels of defensive peptides. We s…	2012	10.1016/j.funbio.2012.10.005	Article	English	17	Woodhams D.C., Bell S.C., Kenyon N., Alford R.A., Rollins-Smith L.A.	Scopus/Web of Science/PubMed
270	Mobile Farm Clinic Outreach to Address Health Conditions Among Latino Migrant Farmworkers in Georgia	Agricultural labor involves exposure to many occupational hazards, some of which can lead to chronic health conditions. The purpose of this study was to conduct an occupational health needs assessment of illnesses and work-related injuries among a Latino migrant farmworker population (recruited to harvest Vidalia onions) in South Georgia. Study data included survey responses from 100 farmworkers …	2012	10.1080/1059924x.2012.713837	Article	English	21	Luque J.S., Reyes-Ortiz C., Marella P., Bowers A., Panchal V., Anderson L., Charles S.	Scopus/Web of Science/PubMed
271	Epidemiologic study of dermatologic disorders among children in South Sinai, Egypt	Background Few epidemiologic surveys have been carried out to determine the prevalence of skin diseases in the population of Egypt, particularly in the Sinai Peninsula. Thus, the necessity of such research in South Sinai is pressing. This study aimed to determine the prevalence of various skin diseases among children in South Sinai. Methods A community-based protocol was followed. The study inclu…	2012	10.1111/j.1365-4632.2012.05475.x	Article	English	32	Yamamah G.A., Emam H.M., Abdelhamid M.F., Elsaie M.L., Shehata H., Farid T., Kamel M.I., Taalat A.A.	Scopus/Web of Science/PubMed
272	Burden of leprosy in Malawi: Community camp-based cross-sectional study	Background: Although leprosy was eliminated globally in 2000, the disease continues to be the significant cause of peripheral neuropathy, disability and disfigurement in some developing countries. However, recent population-based prevalence data are lacking to inform evidence-based renewed commitment for the final push for leprosy elimination at national and sub-national levels. Methods. Communit…	2012	10.1186/1472-698x-12-12	Article	English	15	Msyamboza K.P., Mawaya L.R., Kubwalo H.W., Ngoma D., Liabunya M., Manjolo S., Msiska P.P., Somba W.W.	Scopus/Web of Science/PubMed
273	Nanocarriers for effective topical delivery of anti-infectives	Skin infection is a major cause of hospital admissions as well as causes significant morbidity. Normal human skin is fortunately endowed with its own arsenal of defence strategies to preclude the ingress of pathogenic microbes. However, certain conditions compromise the barrier integrity of skin and permit pathogens to invade the skin. Skin infections may be caused by bacteria, viruses, fungi, an…	2012	10.2174/157341312801784221	Article	English	21	Prabhu P., Patravale V., Joshi M.	Scopus
274	Germ tube mediated invasion of Batrachochytrium dendrobatidis in Amphibian skin is host dependent	Batrachochytrium dendrobatidis (Bd) is the causative agent of chytridiomycosis, a fungal skin disease in amphibians and driver of worldwide amphibian declines. We focussed on the early stages of infection by Bd in 3 amphibian species with a differential susceptibility to chytridiomycosis. Skin explants of Alytes muletensis, Litoria caerulea and Xenopus leavis were exposed to Bd in an Ussing chamb…	2012	10.1371/journal.pone.0041481	Article	English	50	van Rooij P., Martel A., D'Herde K., Brutyn M., Croubels S., Ducatelle R., Haesebrouck F., Pasmans F.	Scopus/Web of Science/PubMed
275	Only skin deep: Shared genetic response to the deadly chytrid fungus in susceptible frog species	Amphibian populations around the world are threatened by an emerging infectious pathogen, the chytrid fungus Batrachochytrium dendrobatidis (Bd). How can a fungal skin infection kill such a broad range of amphibian hosts? And do different host species have a similar response to Bd infection? Here, we use a genomics approach to understand the genetic response of multiple susceptible frog species t…	2012	10.1111/j.1365-294x.2012.05481.x	Article	English	70	Rosenblum E.B., Poorten T.J., Settles M., Murdoch G.K.	Scopus/Web of Science/PubMed
276	Antifungal activity of Andrographis paniculata extracts and active principles against skin pathogenic fungal strains in vitro	Context: Andrographis paniculata Nees. (Acanthaceae) is an annual herbaceous plant widely cultivated in southern Asia, China, and Europe. It is used in the treatment of skin infections in India, China, and Malaysia by folk medicine practitioners. Objective: Antifungal activity of the whole plant extracts and isolation of active principles from A. paniculata were investigated. Materials and method…	2012	10.3109/13880209.2011.641021	Article	English	32	Sule A., Ahmed Q.U., Latip J., Samah O.Abd., Omar M.N., Umar A., Dogarai B.B.S.	Scopus/Web of Science/PubMed
277	Characterization of Malassezia microbiota in the human external auditory canal and on the sole of the foot	Of the fungal skin microbiota, the lipophilic yeast genus Malassezia predominates at all body sites. Of the members of this genus, M. globosa, M. restricta, and M. sympodialis are the most common on the face, limbs, and trunk. In the present study, the Malassezia microbiotas in the external auditory canal and on the sole of the foot were characterized. M. slooffiae was the most common species in …	2012	10.1111/j.1348-0421.2012.00430.x	Article	English	14	Zhang E., Tanaka T., Tsuboi R., Makimura K., Nishikawa A., Sugita T.	Scopus/Web of Science/PubMed
278	Plasma medicine in dermatology: Basic antimicrobial efficacy testing as prerequisite to clinical plasma therapy	Plasma medicine has become an emerging field in medical sciences since cold plasma has demonstrated significant antibacterial properties in vitro and in vivo. However, systematic antimicrobial plasma testing against bacteria, fungi, and parasites is still lacking. Chronic wounds, fungal skin and nail infections, and colonization with multidrug-resistant pathogens like Staphylococcus aureus (MRSA)…	2012	10.1615/plasmamed.2014006217	Article	English	25	Daeschlein G., Scholz S., Emmert S., von Podewils S., Haase H., von Woedtke T., Jünger M.	Scopus
279	Fungal skin infections in children	Fungal skin infections have increased in prevalence over the past 30 years. The pathogenic fungi that cause these infections can be classified into dermatophytes and yeasts. Dermatophytes cause infections of keratinised tissue, such as hair, skin and nails. Yeasts can cause superficial infections or more deep-seated infections in people who are immunocompromised. Fungal skin infections are a comm…	2012	10.7748/ns.27.11.52.s51	Article	English	4	Robinson J.	Scopus/PubMed
280	Toxic thermoresistant metabolites of Fusarium oxysporum are capable of inducing histopathological alterations in Wistar rats	The genus Fusarium is known to produce mycotoxins that cause fusariosis in plants, animals and humans. Mycotoxins are among the virulence factors of this genus. Metabolic extracts of Fusarium oxysporum, isolated from a patient with onychomycosis and sterilized by filtration or autoclave, were inoculated intradermally into Wistar rats at concentrations of 0.25, 0.5 and 1 μg/μL, and the effects on …	2012	10.1590/s1678-91992012000200003	Article	English	6	Hernandes L., Marangon A.V., Salci T., Svidzinski T.I.E.	Scopus/Web of Science
281	Survey of skin disorders in newborns: Clinical observation in an Egyptian medical centre nursery [Étude sur les affections cutanées des nouveau-nés: Observations cliniques dans un service pédiatrique égyptien]	The frequency of neonatal skin disorders has not been well studied in Egypt. Our aim was to address patterns of dermatological changes in a sample of Egyptian newborns. In a descriptive prospective cohort study 600 newborns in Sohag University hospital nursery were dermatologically examined within the first 5 days of birth. Skin disorders were detected in 240 neonates (40.0%). Birthmarks were fou…	2012	10.26719/2012.18.1.49	Article	English; French	11	El-Moneim A.A., El-Dawela R.E.	Scopus/PubMed
282	Histopathology Confirms White-Nose Syndrome in Bats in Europe	White-nose syndrome, associated with the fungal skin infection geomycosis, caused regional population collapse in bats in North America. Our results, based on histopathology, show the presence of white-nose syndrome in Europe. Dermatohistopathology on two bats (Myotis myotis) found dead in March 2010 with geomycosis in the Czech Republic had characteristics resembling Geomyces destructans infecti…	2012	10.7589/0090-3558-48.1.207	Article	English	56	Pikula J., Bandouchova H., Novotný L., Meteyer C.U., Zukal J., Irwin N.R., Zima J., Martínkova N.	Scopus/Web of Science/PubMed
283	Herbal remedies: A good source of treatment against fungal skin infections	Dermatophytes are the fungal pathogens of humans and animals infecting the keratinized tissues e.g., skin, nails and hairs, they are most likely found in hot humid areas (Nweze, 2010). These fungi can easily digest the keratinized tissue by releasing sulphite, exo- and endoproteases (Monod, 2008). Sulphite being a reducing agent broke the disulphide bonds of keratin protein and made them more vul…	2011	10.3923/pjbs.2011.1072.1073	Article	English	1	Ozaslan M.	Scopus/PubMed
284	Fungal Skin Diseases	[No abstract available]	2011	10.1016/b978-1-4160-5663-8.00004-5	Book Chapter	English	0	[No author name available]	Scopus
285	Polymorphic repetitive loci of the amphibian pathogen Batrachochytrium dendrobatidis	Batrachochytrium dendrobatidis (Bd), the cause of a fatal fungal skin disease ofamphibians that has led to massive die-offs, global declines and extinctions, has spread internationallyas a pandemic clone with low genetic diversity. A need exists to develop highly polymorphicmarkers to determine centers of origin and patterns of spread to assist in the development ofmanagement strategies. Comparis…	2011	10.3354/dao02396	Article	English	3	Garland S., James T.Y., Blair D., Berger L., Skerratt L.F.	Scopus/Web of Science/PubMed
286	Characterization of the skin fungal microbiota in patients with atopic dermatitis and in healthy subjects	Patients with atopic dermatitis (AD) are highly susceptible to viral, bacterial, and fungal skin infections because their skin is dry and this compromises the barrier function of the skin. Therefore, the skin microbiota of patients with AD is believed to be different from that of healthy individuals. In the present study, the skin fungal microbiota of nine patients with mild, moderate, or severe …	2011	10.1111/j.1348-0421.2011.00364.x	Article	English	133	Zhang E., Tanaka T., Tajima M., Tsuboi R., Nishikawa A., Sugita T.	Scopus/Web of Science/PubMed
287	Gastrointestinal basidiobolomycosis: An emerging fungal infection causing bowel perforation in a child	Basidiobolomycosis is an unusual fungal skin infection that rarely involves the gastrointestinal (GI) tract. We report a 10-year-old boy diagnosed as suffering GI basidiobolomycosis after being misdiagnosed first as suffering intestinal malignancy then schistosomiasis. The patient presented with fever, abdominal pain, vomiting, abdominal tenderness and rigidity with marked blood eosinophilia. Abd…	2011	10.1099/jmm.0.028613-0	Article	English	30	El-Shabrawi H.F.M., Kamal N.M., Jouini R., Al-Harbi A., Voigt K., Al-Malki T.	Scopus/Web of Science/PubMed
288	Melanogenesis in dermatophyte species in vitro and during infection	Dermatophytes are keratinophilic fungi that are the most common cause of fungal skin infections worldwide. Melanin has been isolated from several important human fungal pathogens, and the polymeric pigment is now recognized as an important virulence determinant. This study investigated whether dermatophytes, including Trichophyton rubrum, Trichophyton mentagrophytes, Epidermophyton floccosum and …	2011	10.1099/mic.0.047928-0	Article	English	34	Youngchim S., Pornsuwan S., Nosanchuk J.D., Dankai W., Vanittanakom N.	Scopus/Web of Science/PubMed
289	Cutaneous phaeohyphomycosis due to Cladophialophora bantiana [Phaeohyphomycose cutanée Cladophialophora bantiana]	Background: Among dematiaceous fungi responsible for phaeohyphomycosis, Cladophialophora bantiana is an opportunistic pathogen that causes central nervous system infections, chiefly in immunocompromised patients. Only a few reports on skin involvements have been reported in the recent dermatological literature. Herein we report the case of an immunocompetent patient with cutaneous phaeohyphomycos…	2011	10.1016/j.annder.2011.01.044	Article	French	5	Schoeffler A., Redon E., Contet-Audonneau N., Cuny J.-F., Lo-Jeanpierre B., Beurey P., Barbaud A., Schmutz J.-L.	Scopus/Web of Science
290	Extensive long-standing chromomycosis due to Fonsecaea pedrosoi: Three cases with relevant improvement under voriconazole therapy	Objective: To evaluate voriconazole in the treatment of extensive cases of chromomycosis. Chromomycosis is a chronic infection, which is extremely difficult to eradicate, and is caused by dematiaceous (dark-colored) fungi which affect the skin and subcutaneous tissues, with Fonsecaea pedrosoi being the major etiologic agent. Drugs such as itraconazole, terbinafine, posaconazole and amphotericin B…	2011	10.3109/09546630903585074	Article	English	20	Criado P.R., Careta M.F., Valente N.Y.S., Martins J.E.C., Rivitti E.A., Spina R., Belda Jr. W.	Scopus/Web of Science
291	Lacaziosis and lacaziosis-like prevalence among wild, common bottlenose dolphins Tursiops truncatus from the west coast of Florida, USA	Lacaziosis (lobomycosis; Lacazia loboi) is a fungal skin disease that naturally occurs only in humans and dolphins. The first reported case of lacaziosis in a bottlenose dolphin Tursiops truncatus occurred in 1970 in Sarasota Bay, Florida, USA, and subsequent photo-ID monitoring of the Sarasota Bay dolphin population has revealed persistence of the disease. The objectives of this study were to es…	2011	10.3354/dao02345	Article	English	12	Hart L.B., Rotstein D.S., Wells R.S., Bassos-Hull K., Schwacke L.H.	Scopus/Web of Science/PubMed
292	Cowden's syndrome: A clinical, immunological, and histopathological study	Background Cowden's syndrome is a rare, autosomal dominant condition characterized by hamartomas of the gastrointestinal tract and cancer of the breast and thyroid. This study describes the clinical, immunological, and histopathological status of four Cowden's syndrome cases from two different families. Methods Biopsies were taken from different skin, mucous membrane, and intestinal lesions in al…	2011	10.1111/j.1365-4632.2010.04669.x	Article	English	15	Amer M., Mostafa F.F., Attwa E.M., Ibrahim S.	Scopus/Web of Science/PubMed
293	Letter: Some Caveats in Skin Bank Practices from the Perspectives of Fungal Skin Flora	[No abstract available]	2011	10.1111/j.1742-481x.2010.00737.x	Letter	English	0	Peralam P.Y.	Scopus/Web of Science/PubMed
294	A 5-year survey of dermatomycoses in southwest Poland, years 2003-2007	The study was performed to analyse the spectrum of dermatomycoses in southwest Poland during the period 2003-2007. A total of 10486 patients were investigated for fungal skin infections by means of native specimen and cultivating procedures. Skin scrapings, plucked hairs and nail clippings were examined and identified by direct microscopy and culture. From 2468 patients, 2753 fungi were identifie…	2011	10.1111/j.1439-0507.2009.01774.x	Article	English	21	Jankowska-Konsur A., Dylag M., Hryncewicz-Gwóźdź A., Plomer-Niezgoda E., Szepietowski J.C.	Scopus/Web of Science/PubMed
295	In vitro killing of clinical fungal strains by low-temperature atmospheric-pressure plasma jet	Plasma medicine is an expanding focus and offers new aspects of therapy combining potent physical partial efficacies, like such as ultraviolet, infrared, and reactive species and particles, and nowadays, many successful treatments of different illnesses have been described. Fungal skin and nail infections pose significant therapeutic and economical problems. To test the plasma susceptibility of c…	2011	10.1109/tps.2010.2063441	Article	English	81	Daeschlein G., Scholz S., Von Woedtke T., Niggemeier M., Kindel E., Brandenburg R., Weltmann K.-D., Junger M.	Scopus/Web of Science
296	Triazole antifungal agents in invasive fungal infections: A comparative review	Invasive fungal disease continues to be a problem associated with significant morbidity and high mortality in immunocompromised and, to a lesser extent, immunocompetent individuals. Triazole antifungals have emerged as front-line drugs for the treatment and prophylaxis of many systemic mycoses. Fluconazole plays an excellent role in prophylaxis, empirical therapy, and the treatment of both superf…	2011	10.2165/11596540-000000000-00000	Review	English	199	Lass-Flörl C.	Scopus/Web of Science/PubMed
297	Infective Skin Conditions and Infestations	[No abstract available]	2010	10.1002/9781444319804.ch12	Book Chapter	English	0	Robinson J.	Scopus
298	Biologic therapy in refractory chronic non-bacterial osteomyelitis of childhood	Objective: To date there is no uniformly effective treatment for either chronic recurrent multifocal osteomyelitis (CRMO) or synovitis, acne, pustulosis, hyperostosis and osteitis (SAPHO) syndrome. We report on our clinical experience of using biologic therapy to treat children with these conditions. Methods: Retrospective descriptive case series of four children with refractory disease treated w…	2010	10.1093/rheumatology/keq122	Article	English	113	Eleftheriou D., Gerschman T., Sebire N., Woo P., Pilkington C.A., Brogan P.A.	Scopus/Web of Science/PubMed
299	Nodular granulomatous fungal skin diseases of cats in the United Kingdom: A retrospective review	IDEXX Laboratories database of cases submitted from the UK between March 2005 and February 2008 (36 months) was investigated for feline nodular granulomatous skin disease associated with fungal infection. Cytological and/or histological slides were reviewed and the diagnosis was based on the microscopic pattern of the inflammatory response and morphology of the causative organism. Aetiological di…	2010	10.1111/j.1365-3164.2009.00801.x	Article	English	17	Miller R.I.	Scopus/Web of Science/PubMed
300	The changing face of Microsporum spp infections	Significant changes in epidemiology, etiology, and the clinical pattern of mycotic infections caused by Microsporum spp have been observed in recent years. Fungal infections caused by M canis, followed by M gypseum and M hominis, involving skin and its appendages, represent one of the most common diseases worldwide and a recalcitrant problem in dermatology that demands appropriate diagnostic and …	2010	10.1016/j.clindermatol.2009.12.007	Note	English	34	Skerlev M., Miklić P.	Scopus/Web of Science/PubMed
301	Multiple modality treatment regimen in an aggressive resistant fungal hand infection: A case report	Cutaneous fungal infections are a rare but significant complication associated with immunocompromised states. Lesions allowed to progress to disseminated fungemia are associated with a near 80% mortality rate. Treatment guidelines aimed at local control are vague, centering on wide local excision with systemic antifungal medications. We present the case of a 3-year-old female who, while receiving…	2010	10.1007/s11552-009-9252-1	Article	English	6	Pyle J.W., Holladay J., Molnar J.A., Martin J.S., DeFranzo A.J.	Scopus/PubMed
302	Infectious diseases	Introduction: Although accounting for a small proportion of the aetiological causes of intellectual disability (ID), infectious diseases are important because of the potential for primary prevention by treatment, vaccination or public health measures. People with ID can be vulnerable to infection through behavioural factors related to their level of disability, due to living in institutional sett…	2010	10.1017/cbo9780511770715.006	Book Chapter	English	1	Douglas N.A.	Scopus
303	Ciclopirox: Recent nonclinical and clinical data relevant to its use as a topical antimycotic agent	Ciclopirox is a topical antimycotic agent belonging to the chemical class of hydroxypyridones and not related to azoles or any other class of antifungal agents. Its antimicrobial profile includes nearly all of the clinically relevant dermatophytes, yeasts and moulds, and is therefore broader than that of most other antimycotics. It is also active against certain frequently azole-resistant Candida…	2010	10.2165/11538110-000000000-00000	Review	English	110	Subissi A., Monti D., Togni G., Mailland F.	Scopus/Web of Science/PubMed
304	Sporotrichosis and dematiaceous fungal skin infections	Sporotrichosis is a chronic infectious granuloma of skin. The detection of fungal elements in pathological examination and the isolation of Sporothrix schenckii from the lesion are requisite for diagnosis. The sporotrichin test is useful as an auxiliary examination, but a false-negative reaction might occur in some cases. Oral potassium iodide is first choice of treatment, because of its modest c…	2009	10.3314/jjmm.50.213	Review	Japanese	2	Kusuhara M.	Scopus/PubMed
305	Extended fungal skin infection due to Aureobasidium pullulans	Black yeasts are a rare cause of infections especially in Europe, yet their pathological significance is increasing, particularly in cases of immunosuppression. We report a 53-year-old immunocompetent woman with an extensive skin infection due to Aureobasidium pullulans, who responded well to treatment with liposomal amphotericin B. © 2008 British Association of Dermatologists.	2009	10.1111/j.1365-2230.2009.03663.x	Article	English	13	Pikazis D., Xynos I.D., Xila V., Velegraki A., Aroni K.	Scopus/Web of Science/PubMed
306	Analysis of differentially expressed genes associated with tryptophan-dependent pigment synthesis in M. furfur by cDNA subtraction technology	Malassezia species are associated with pityriasis versicolor (PV) and its depigmented variant pityriasis versicolor alba (PVa), widespread fungal skin infections in humans. The pathogenesis of PV and PVa remains unclear, including their clinical and histological symptoms such as hyper- and depigmentation, reduced responsiveness to ultraviolet radiation and lack of inflammatory reaction despite hi…	2009	10.1080/13693780802238842	Article	English	8	Hort W., Lang S., Brunke S., Mayser P., Hube B.	Scopus/Web of Science/PubMed
307	Athlete's Foot	[No abstract available]	2009	10.1002/9781444300161.ch37	Book Chapter	English	0	Crawford F.	Scopus
308	Deep fungal infections	Fungal diseases affect a considerable number of people world-wide and can cause significant morbidity and mortality. The number of cases has multiplied with the increase in world travel and immunosuppression. Generally speaking, fungal infections can be classified as either superficial or deep. Superficial fungal infections, including dermatophytes, have an affinity for keratin and, therefore, ar…	2009	10.1017/cbo9780511576829.011	Book Chapter	English	0	Evandro A.R., Criado P.R.	Scopus
309	Lethal synergy of solar UV-radiation and H2O2 on wild Fusarium solani spores in distilled and natural well water	Environmentally-friendly disinfection methods are needed in many industrial applications. As a natural metabolite of many organisms, hydrogen peroxide (H2O2)-based disinfection may be such a method as long as H2O2 is used in non-toxic concentrations. Nevertheless, when applied alone as a disinfectant, H2O2 concentrations need to be high enough to achieve significant pathogen reduction, and this m…	2009	10.1016/j.watres.2009.01.017	Article	English	62	Sichel C., Fernández-Ibáñez P., de Cara M., Tello J.	Scopus/Web of Science/PubMed
310	Topical fenticonazole in dermatology and gynaecology: Current role in therapy	Fenticonazole is an imidazole derivative with a broad spectrum of antimycotic activity against dermatophytes and yeasts in in vitro and clinical studies. Fenticonazole exerts its unique antimycotic mechanism of action in the following three ways: (i) inhibition of the secretion of protease acid by Candida albicans; (ii) damage to the cytoplasmic membrane; and (iii) by blocking cytochrome oxidases…	2008	10.2165/00003495-200868150-00007	Review	English	21	Veraldi S., Milani R.	Scopus/Web of Science/PubMed
311	Mycological examination of the barbers' tools about sources of fungal infections	The purpose of this study was to determine the colonisation of causative agents for fungal skin infections on the tools and surfaces of barbershops. A total of 357 samples from tools and surfaces of 32 barbershops in Erzurum, Turkey were collected and examined for fungal pathogens. From the combs, Trichophyton rubrum (1), non-dermatophytic moulds (35) and Candida albicans (1); from the hairbrushe…	2008	10.1111/j.1439-0507.2007.01482.x	Article	English	7	Uslu H., Uyanik M., Ayyildiz A.	Scopus/Web of Science/PubMed
312	Intracellular lectins of Lentinus edodes at various developmental stages of the fungus	A number of lectins varying in polypeptide composition and carbohydrate specificity were isolated from Lentinus edodes at different stages of its morphogenesis: nonpigmented mycelium, brown mycelium film, and fruiting body. Three lectins were identified at the nonpigmented mycelium stage, two of them being dimers consisting of 16 and 45 kDa and 16 and 42 kDa subunits; the third is a tetramer of 1…	2008	10.1134/s0026261708040097	Article	English	8	Vetchinkina E.P., Sokolov O.I., Nikitina V.E.	Scopus
313	Antimycotic effect of the aqueous leaf extract of Pterocarpus erinaceus in rats	The aqueous leaf extract of Pterocarpus erinaceus (Leguminoceae) was investigated for possible antimycotic effect in Sprague dawley rats. The extract was tested against moulds (Aspergillus niger and Aspergillus flavus) and dermatophytes, (Trichophyton rubrum and Microsporum gypseum). The extract at 20-40 mg kg-1 body weight significantly (p&lt;0.05) and dose dependently inhibited the growth rate …	2008	10.3923/jpt.2008.318.323	Article	English	1	Etuk E.U., Suberu H.A., Ameh I.G., Abubakar K.	Scopus
314	Proteomic profile of dormant Trichophyton Rubrum conidia	Background: Trichophyton rubrum is the most common dermatophyte causing fungal skin infections in humans. Asexual sporulation is an important means of propagation for T. rubrum, and conidia produced by this way are thought to be the primary cause of human infections. Despite their importance in pathogenesis, the conidia of T. rubrum remain understudied. We intend to intensively investigate the pr…	2008	10.1186/1471-2164-9-303	Article	English	36	Leng W., Liu T., Li R., Yang J., Wei C., Zhang W., Jin Q.	Scopus/Web of Science/PubMed
315	The man who got too close to his cows	Trichophyton verrucosum is one of the more common chronic zoophilic dermatophytes. Its presentation is diverse, including aggressive inflammatory skin lesions, and it can be accompanied by constitutional symptoms, such as fever and lymphadenopathy. As such, it may be misdiagnosed as bacterial cellulitis and undergo multiple antibiotic courses unsuccessfully, without consideration of a fungal skin…	2008	10.1016/j.diagmicrobio.2007.11.007	Article	English	14	Silver S., Vinh D.C., Embil J.M.	Scopus/Web of Science/PubMed
316	Fungal diseases in organ transplant recipients	FUNGAL SKIN INFECTION IN ORGAN TRANSPLANT RECIPIENTS – EPIDEMIOLOGY, DIAGNOSIS, AND TREATMENT. Introduction. Organ transplant recipients are susceptible to bacterial, viral, and fungal skin infections. The rates and timing of fungal infections in transplant recipients vary by the type of transplant. Even though most of these infections occur within the first six months of transplantation, patient…	2008	10.1017/cbo9780511547379.016	Book Chapter	English	0	Geusau A., Presterl E.	Scopus
317	Activity of Lentinus edodes intracellular lectins at various developmental stages of the fungus	We studied changes of the hemagglutinating activity of intracellular lectins of the basidiomycete Lentinus edodes (shiitake) at various stages of its morphogenetic development depending on erythrocyte type, growth medium, and lectin purification degree. Under certain experimental conditions, the specific lectin activity at the brown mycelium film stage exceeded the corresponding value for nonpigm…	2008	10.1007/s10438-008-1011-5	Article	English	6	Vetchinkina E.P., Nikitina V.E., Tsivileva O.M., Garibova L.V.	Scopus
318	Fungal skin infections among prison inmates in Abakaliki, Nigeria	Of 402 prison inmates screened for fungal skin lesions, 79 (19.7%) showed skin lesions, which proved mycologically positive by microscopy and culture. Dermatophytes were responsible for skin lesions in 61 (77.2%) of the inmates, while non-dermatophytes accounted for 18 (22.8%) of the lesions. The dermatophytes recovered were mostly anthropophilic and included Trichophyton rubrum 33 (41.8%); T. me…	2008	10.1111/j.1439-0507.2007.01408.x	Article	English	11	Oyeka C.A., Eze I.I.	Scopus/Web of Science/PubMed
319	TrED: The Trichophyton rubrum expression database	Background: Trichophyton rubrum is the most common dermatophyte species and the most frequent cause of fungal skin infections in humans worldwide. It's a major concern because feet and nail infections caused by this organism is extremely difficult to cure. A large set of expression data including expressed sequence tags (ESTs) and transcriptional profiles of this important fungal pathogen are now…	2007	10.1186/1471-2164-8-250	Article	English	26	Yang J., Chen L., Wang L., Zhang W., Liu T., Jin Q.	Scopus/Web of Science/PubMed
320	A survey of skin disease and skin-related issues in Arab Americans	Background: There is a paucity of knowledge relating to dermatologic conditions in Arab Americans. Objective: To assess common skin diseases and concerns and to evaluate access to dermatologic care and perception of skin in Arab Americans. Methods: Arab Americans from 3 Southeast Michigan locations (community health center [n = 207], mosque [n = 95], and church [n = 99]) completed a survey questi…	2007	10.1016/j.jaad.2007.01.031	Article	English	57	El-Essawi D., Musial J.L., Hammad A., Lim H.W.	Scopus/Web of Science/PubMed
321	Isoconazole	Isoconazole nitrate is an imidazole antifungal that is active against a broad spectrum of fungi, including Candida species, dermatophytes, and Malassezia furfur. It is also active against some gram-negative bacteria. Isoconazole is used topically in the treatment of vaginal mycoses and in fungal skin infections. © 2007 Copyright © 2007 Elsevier Inc.	2007	10.1016/b978-008055232-3.61956-7	Book Chapter	English	0	Waugh C.D.	Scopus
322	Comparative study of 2% sertaconazole solution and cream formulations in patients with tinea corporis, tinea pedis interdigitalis, or a corresponding candidosis	Background: Based on the results of numerous preclinical and clinical studies, sertaconazole can be considered a safe and effective drug for the treatment of fungal skin infections. Objective: The objective of the study was to compare the efficacy of a solution containing 2% sertaconazole with the well established 2% sertaconazole cream formulation in patients with tinea corporis, tinea pedis int…	2007	10.2165/00128071-200708060-00007	Article	English	17	Borelli C., Klövekorn G., Ernst T.-M., Bödeker R.-H., Korting H.C., Neumeister C.	Scopus/Web of Science/PubMed
323	Mycological flora of the Hammams, traditional Turkish bath	Traditional Turkish baths, Hammams, occupy a prominent place in public health in history and at present. It is well-known that baths are major sources of fungal skin infections, but according to our knowledge fungal flora of Turkish Hammams was not defined yet. In Bolu, Turkey, two Hammams were open to public and for detecting fungal flora, we collected 209 samples from different part of floors, …	2006	10.1111/j.1439-0507.2006.01258.x	Article	English	15	Goksugur N., Karabay O., Kocoglu E.	Scopus/Web of Science/PubMed
324	Expression and potential function of cathelicidin antimicrobial peptides in dermatophytosis and tinea versicolor	Objectives: This study was designed to characterize the role of the human cathelicidin LL-37 in fungal skin infections such as dermatophytosis and tinea versicolor. Methods: The in vitro antimicrobial activity of synthetic antimicrobial peptides including the human cathelicidin LL-37 against Malassezia furfur and several dermatophytes was determined. Immunostaining was performed to determine expr…	2006	10.1093/jac/dkl078	Article	English	53	López-García B., Lee P.H.A., Gallo R.L.	Scopus/Web of Science/PubMed
325	Cutaneous fungal infections in the oncology patient: Recognition and management	There are two main types of fungal infections in the oncology patient: primary cutaneous fungal infections and cutaneous manifestations of fungemia. The main risk factor for all types of fungal infections in the oncology patient is prolonged and severe neutropenia; this is especially true for disseminated fungal infections. Severe neutropenia occurs most often in leukemia and lymphoma patients ex…	2006	10.2165/00128071-200607010-00004	Review	English	87	Mays S.R., Bogle M.A., Bodey G.P.	Scopus/Web of Science/PubMed
326	The prevalence of diagnosed cutaneous manifestations during ambulatory diabetes visits in the United States, 1998-2002	Background: The prevalence of diabetes has been rapidly increasing. Previous reports indicated that diabetics are prone to certain cutaneous diseases. Objective: To determine the frequencies of diagnosed skin conditions during ambulatory diabetes visits in the USA. Methods: We evaluated two national ambulatory medical care surveys between 1998 and 2002 and compared the diagnoses of 7 categories o…	2006	10.1159/000091249	Article	English	15	Wang Y.R., Margolis D.	Scopus/Web of Science/PubMed
327	Factors influencing coexistence of toenail onychomycosis with tinea pedis and other dermatomycoses: A survey of 2761 patients	Objective: To evaluate the prevalence and factors influencing the presence of concomitant dermatomycoses in patients with toenail onychomycosis. Design: Prospective study based on a specially designed questionnaire completed by dermatologists. Patients: A total of 2761 patients with toenail onychomycosis. Main Outcome Measures: The diagnosis of fungal skin infections was confirmed by direct micro…	2006	10.1001/archderm.142.10.1279	Article	English	107	Szepietowski J.C., Reich A., Garlowska E., Kulig M., Baran E.	Scopus/Web of Science/PubMed
328	Antidermatophyte activity of ether extract of Nigella sativa and its active principle, thymoquinone	The antifungal activity of ether extract of Nigella sativa seed and its active principle thymoquinone was tested against eight species of dermatophytes: four species of Trichophyton rubrum and one each of Trichophyton interdigitale, Trichophyton mentagrophytes, Epidermophyton floccosum and Microsporum canis. Agar diffusion method with serial dilutions of ether extract of Nigella sativa, thymoquin…	2005	10.1016/j.jep.2005.04.002	Article	English	102	Aljabre S.H.M., Randhawa M.A., Akhtar N., Alakloby O.M., Alqurashi A.M., Aldossary A.	Scopus/Web of Science/PubMed
329	In vivo imaging of Malassezia yeasts on human skin using confocal laser scanning microscopy	Fiber-based confocal laser scanning microscopy affords a vast field of application in medical research and clinical practice. The application of fluorescent dye allows real-time imaging of yeasts of the genus Malassezia on human skin in vivo. An Ar+-laser is used to excite the fluorescent food dye sodium fluorescein at 488 nm. Its emission is simultaneously detected in the spectral region from 50…	2005	10.1002/lapl.200410156	Article	English	32	Meyer L.E., Otberg N., Tietz H.-J., Sterry W., Lademann J.	Scopus/Web of Science
330	A novel mycological analysis valuable for evaluating therapeutic efficacy of antimycotics against experimental dermatophytosis in guinea pigs	Although antimycotic effects are mainly evaluated with regard to whether or not the fungi grow from a specimen obtained from the drug-treated skin, the potential for discrepancies in skin specimens in which the fungi are grown has not been evaluated, in the experimental tinea model. In this study, to evaluate the therapeutic effectiveness of antimycotic agents against fungal skin infection, a nov…	2005	10.1111/j.1439-0507.2004.01075.x	Article	English	9	Majima T., Masui S., Uchida K., Yamaguchi H.	Scopus/Web of Science/PubMed
331	Quality control of Luk Prakop, a Thai herbal combination	Luk Prakop (abbreviated LPK and pronounced "Loo Brah Kope") is a Thai herbal combination which has been traditionally used to treat a variety of ailments including musculo-skeletal pain, urinary obstruction, skin aging, inflammation and fungal skin infections. It contains roughly three to fourteen kinds of herbs, depending on the manufacturer. A cotton bag containing these herbs is placed on a ho…	2005	10.17660/actahortic.2005.679.15	Conference Paper	English	0	Nandhasri P., Pawa K.K.	Scopus/Web of Science
332	Outbreak of tinea corporis gladiatorum, a fungal skin infection due to Trichophyton tonsurans, in a French high level judo team	An outbreak of 49 cases of tinea corporis gladiatorum due to Trichophyton tonsurans infection occurred in a high level judo team of 131 members in Orleans, central France, between October 2004 and April 2005. The team was divided into 5 groups: cadet-junior boys (n=44), cadet-junior girls (n=33), male university students (n= 15), female university students (n=21), and a group called 'pole techniq…	2005	10.2807/esm.10.09.00562-en	Article	English	48	Poisson D.M., Rousseau D., Defo D., Estève E.	Scopus
333	Equine bacterial and fungal diseases: A diagnostic and therapeutic update	Bacterial and fungal skin diseases are important in the horse. Bacterial skin diseases (pyoderma) are most often caused by Staphylococcus species, Corynebacterium pseudotuberculosis or Dermatophilus congolensis. The most common clinical signs associated with bacterial skin infections are crusts, papules, abscesses, and draining tracts; the latter two lesions are more commonly associated with C. p…	2005	10.1053/j.ctep.2005.10.004	Article	English	17	White S.D.	Scopus
334	Rapid identification and differentiation of fungal DNA in dermatological specimens by LightCycler PCR	The aim was to develop a LightCycler PCR method for the rapid detection and differentiation of fungal DNA in dermatological specimens such as skin scales and skin swabs. LightCycler PCR assays were established for seven primer sets specific for fungal DNA. For each primer set LightCycler melting points were defined by amplification of DNA from 21 fungi and sensitivity was determined by amplificat…	2004	10.1099/jmm.0.45779-0	Article	English	46	Gutzmer R., Mommert S., Küttler U., Werfel T., Kapp A.	Scopus/Web of Science/PubMed
335	Co-administration of ketoconazole to tacrolimus-treated kidney transplant recipients: A prospective randomized study	Background. Since the introduction of calcineurin inhibitors, there has been a significant improvement in the results of solid organ transplantation, including graft and patient survival. However, high cost, chronic nephrotoxicity and other side effects stand as major challenges for long-term use of these drugs. The long-term safety and financial benefits of the combination ketoconazole-cyclospor…	2004	10.1093/ndt/gfh191	Article	English	17	El-Dahshan K.F., Bakr M.A., Donia A.F., Badr A.E.-S., Sobh M.A.-K.	Scopus/Web of Science/PubMed
336	Characteristics of sexual behavior among teenagers in Belgrade [Karakteristike seksualnog ponasanja tinejdzera u beogradu.]	INTRODUCTION: The risks associated with teenage sex include pregnancy and a high rate of sexually transmitted diseases (STDs). MATERIAL AND METHODS: The study compared female teenagers. 32 with STDs and 90 with fungal skin infections who were treated in the City Center for Skin and Venereal Diseases in Belgrade from January 2000 to June 2001. An anonymous questionnaire was used to collect data an…	2004	10.2298/mpns0412592b	Article	Croatian	0	Bjekić M., Vlajinac H., Sipetić S., Marinković J.	Scopus/PubMed
337	Prevalence of skin diseases in rural areas of Assiut Governorate, Upper Egypt	Background: Few epidemiological surveys have been carried out to determine the prevalence of skin diseases in the population of Egypt, particularly "Upper Egypt". So it is a pressing necessity to conduct such a study in rural Assiut. Objectives: To determine the prevalence of various skin diseases in rural Assiut. Subjects and methods: A cross-sectional community-based survey was followed. The su…	2003	10.1046/j.1365-4362.2003.01936.x	Article	English	72	Abdel-Hafez K., Abdel-Aty M.A., Hofny E.R.M.	Scopus/Web of Science/PubMed
338	Curvularia keratitis after laser in situ keratomileusis from a feline source	Fungal keratitis following laser in situ keratomileusis (LASIK) is extremely rare. Except in cases that follow trauma, the source of fungal organisms is unknown in published reports. We report a case of keratitis following LASIK that could be directly traced to a fungal skin infection of the patient's pet cat. © 2003 ASCRS and ESCRS.	2003	10.1016/s0886-3350(02)01608-5	Article	English	12	Tuli S.S., Yoo S.H.	Scopus/Web of Science/PubMed
339	Clinical evaluation of Acalypha ointment in the treatment of superficial fungal skin diseases	In an open non-comparative study to evaluate the efficacy and safety of Acalypha wilkesiana ointment in superficial fungal skin diseases, 32 Nigerian patients with clinical and mycological evidence of superficial mycoses were recruited. Twelve patients defaulted and were lost to follow up, while one patient withdrew because of intolerable excoriation at the site of the lesion. Of the 19 patients …	2003	10.1002/ptr.1161	Article	English	16	Oyelami O.A., Onayemi O., Oladimeji F.A., Ogundaini A.O., Olugbade T.A., Onawunmi G.O.	Scopus/Web of Science/PubMed
340	Curative Potential of Foremost Mitogen Applications	This paper is presented as a sequel to the Mitogen Information Summaries article, representing a condensation of salient features involved with facilitating the curative potential of the more important mitogen applications. Following is a resumé of the critical attributes of mitogen therapy relative to the management of malignant tumors: (1) An inherent capability to recognize and destroy mutated…	2003	10.1089/108497803322702879	Review	English	8	Wimer B.M.	Scopus/Web of Science/PubMed
341	Chromomycosis in an immunosuppressed patient [Cromomicosis en paciente inmunodeprimido]	Deep fungal skin infections are chronic diseases, caused by various groups of fungi traumatically introduced into skin and subcutaneous tissue. Their incidence is very low in our country; and most cases occur in tropical and subtropical regions. Sporotrichosis, mycetoma and chromoblastomycosis are the most common subcutaneous mycoses. We report the case of a 73 year-old woman on immunosupressive …	2003	10.1016/s0001-7310(03)79186-8	Article	Spanish	3	Blázquez Sánchez N., Morán Estefanía M., Fernández-Canedo I., Sánchez Hernández F.J., Martín-Pascual A.	Scopus
342	Structural and antimicrobial studies of some divalent transition metal complexes with some new symmetrical bis (7-formylanil substituted-sulfoxine) Schiff base ligands	Symmetrical bis (7-formyanil substituted-8-hydroxyquinoline-5-sulfonic acid), Schiff bases, react with Co(II), Ni(II) and Cu(II) ions to give MnL (n = 1,2) complexes as established by conductometric titration in 1:1 DMF:H2O. The complexes were identified by elemental analyses, molecular weight determination, thermal analysis, infrared, magnetic moments, electronic absorption, and electron spin re…	2002	10.1080/00958970211906	Article	English	25	Moawad M.M., Hanna W.G.	Scopus/Web of Science
343	Structural and microbial studies of some transition metal complexes of 7-substituted-8-hydroxyquinoline-5-sulphonic acid ligands	The reaction of 7-substituted derivatives of the ligand 5-sulpho-8-hydroxyquinoline (7-X-HL), (X = H, NH2, NO2 and I), with some biologically important transition metal ion such as {CrCIII), Fe(III), Mn(II), Fe(II), Co(II), Ni(II), and Cu(II)} was investigated. The formation of MLn (n = 1, 2) complexes of the ligand Na[7-I-HL] has been established by conductometric titrations in 10% (v/v) ethanol…	2002	10.1080/00958970211877	Article	English	5	Hanna W.G., Moawad M.M.	Scopus/Web of Science
344	Large T-cell lymphoma in a 13-year-old girl with hyperimmunoglobulinemia E syndrome	Large T-cell lymphoma was diagnosed in a 13-year-old girl with hyperimmunoglobulinemia E syndrome (HIES). Her past medical history included severe dermatitis, recurrent pneumonia, urinary tract infections, mucocutaneous herpetic infections, fungal skin infections, and staphylococcal sepsis. The diagnosis of HIES, based on the clinical features and a serum IgE level of > 20 000 IU/ml, was establis…	2002	10.1034/j.1399-3038.2002.00088.x	Article	English	7	Mosseri R., Finkelstein Y., Monselize Y., Garty B.Z.	Scopus/Web of Science/PubMed
345	Occupational health in physiotherapy: General health and reproductive outcomes	Physiotherapists are exposed to many risk factors in their work environment. Their general health status is largely unknown, and conflicting studies suggest possible adverse reproductive effects of electromagnetic radiation to which they may be exposed. As part of a larger study, a systematic sample of one in four physiotherapists on a state register (N = 824) was surveyed. Each subject completed…	2002	10.1016/s0004-9514(14)60168-9	Article	English	21	Cromie J.E., Robertson V.J., Best M.O.	Scopus/Web of Science/PubMed
346	Fungal skin infections in organ transplant recipients	Transplantation is now currently and increasingly performed for the treatment of various acute and chronic diseases. Today the kidney, heart, lung, heart-lung, liver, pancreas, kidney-pancreas, small bowel and bone marrow are being transplanted. The immunological status of patients receiving such transplants exposes them to the risk of developing bacterial, viral and fungal infections. The etiolo…	2002	10.2165/00128071-200203010-00003	Review	English	61	Virgili A., Zampino M.R., Mantovani L.	Scopus/PubMed
347	A systematic review of oral treatments for fungal infections of the skin of the feet	OBJECTIVE: To synthesize the evidence for the effectiveness and cost-effectiveness of oral treatments for fungal infections of the skin of the feet. DESIGN: Systematic review. INTERVENTIONS: Oral treatments for fungal infections. METHODS: Ten electronic databases, four journals and the bibliographies of all review papers identified were searched. The authors also wrote to international pharmaceut…	2001	10.1080/095466301317085336	Article	English	20	Bell-Syer S.E.M., Hart R., Crawford F., Torgerson D.J., Young P., Tyrrell W., Williams H., Russell I.	Scopus/PubMed
348	Fungal skin infections in children: New developments and treatments	New topical and systemic antifungal agents have expanded the therapeutic options available for treatment of fungal infections in childhood. However, the dose and duration of treatment for any marketed drug in a new clinical indication represents an "off label" use and must be carefully evaluated by the clinician before it is prescribed. Treatment of any pediatric dermatophyte infection necessitat…	2001	10.3810/pgm.2001.07.975	Conference Paper	English	7	Berg D., Erickson P.	Scopus/Web of Science/PubMed
349	Commentary: Review: Allylamines, azoles, undecenoic acid, and tolnaftate are effective for fungal skin infections of the foot	[No abstract available]	2000	10.1136/ebn.3.2.50	Note	English	0	Gagan M.J.	Scopus
350	In vitro evaluation of the antifungal activity of Allium sativum bulb extract against Trichophyton rubrum, a human skin pathogen	The aqueous extract of Allium sativum bulbs showed an antifungal effect against the fungal skin pathogen, Trichophyton rubrum, isolated from infected patients. For a given concentration (200 mg of bulbs/1 ml), the volume of the aqueous garlic extract loaded on to the discs, and the diameter of the inhibitory zone formed around the disc on the fungal lawn showed positive correlation. Extract-inclu…	2000	10.1023/a:1008972016316	Article	English	10	Karunyal Samuel J., Andrews B., Shyla Jebashree H.	Scopus/Web of Science
351	Fungal skin disorders	Fungal skin infections are becoming more common, and primary care physicians must be familiar with the diagnosis and treatment of these disorders. Dermatophyte infections including tinea pedis, corporis and cruris; pityriasis versicolor; and cutaneous candidiasis are the focus of this article. Common presentations of these disorders, the differential diagnosis, and current treatments are stressed…	2000	10.1016/s0095-4543(05)70203-7	Article	English	12	Rupke S.J.	Scopus/Web of Science/PubMed
352	Oral terbinafine (lamisil®) in the short-term treatment of fungal infections of the skin: Results of a post-marketing surveillance study	Oral terbinafine (Lamisil(r), Novartis Pharma AG, Basel, Switzerland) is an effective therapy for fungal infections of the skin and nails. A post- marketing surveillance study was undertaken to evaluate the clinical efficacy and safety of oral terbinafine. A total of 454 patients with clinically and mycologically confirmed superficial fungal infections of the skin were enrolled from 79 dermatolog…	1999	10.1046/j.1439-0507.1999.00515.x	Article	English	1	Binder M., Nell G.	Scopus/Web of Science/PubMed
353	Microsphaeropsis olivacea as an etiological agent of human skin infection	Microsphaeropsis olivacea is reported as the agent of a case of human skin infection in an otherwise healthy woman. This fungus has not been reported previously as causing disease in humans It was identified on the basis of its production of pycnidia and conidial structures typical of the Coelomycetes, and by its light brown, ellipsoid to cylindrical and thick walled conidia. The in vitro inhibit…	1999	10.1046/j.1365-280x.1999.00188.x	Article	English	16	Guarro J., Mayayo E., Tapiol J., Aguilar C., Cano J.	Scopus/Web of Science
354	Survey of keratinophilic fungi isolated from city park soils of Pisa, Italy	A survey of geophilic dermatophytes and related keratinophilic fungi isolated from city park soils of Pisa is reported. Twenty-three (48%) soil samples out of 48 were positive by hair baiting. The following species were isolated: Microsporum gypseum (39%), Trichophyton ajelloi (31%), Chrysosporium keratinophilum (14%), T. terrestre (8%), M. fulvum, Ch. luteum, Ch. indicum (5% each) and M. cookei …	1998	10.1023/a:1006919707839	Article	English	24	Papini R., Mancianti F., Grassotti G., Cardini G.	Scopus/Web of Science/PubMed
355	Antifungal therapy during pregnancy	Careful consideration of the benefit to the mother and the risk to the fetus is required when prescribing antifungal therapy in pregnancy. Imidazoles are considered safe as topical therapy for fungal skin infections during pregnancy. Nystatin is minimally absorbed and is effective for vaginal therapy. Although vaginal use of the imidazoles is probably safe during the later stages of pregnancy, th…	1998	10.1086/514977	Article	English	105	King C.T., Rogers P.D., Cleary J.D., Chapman S.W.	Scopus/Web of Science/PubMed
356	Do today's therapies provide perfect solutions to fungal skin infections?	Dermatophyte infections are common superficial infections. The prevalence of tinea capitis has remained static in many parts of the world, but has increased in cities in the UK. While short and effective treatments are available for most of the common infections, treatment for tinea capitis is still suboptimal. To improve therapy of all dermatophyte infections requires prediction of which subtype…	1998	10.3109/09546639809160712	Conference Paper	English	3	Hay R.J.	Scopus/Web of Science
357	Nondermatologists are more likely than dermatologists to prescribe antifungal/corticosteroid products: An analysis of office visits for cutaneous fungal infections, 1990-1994	Background: Dermatologists have greater accuracy than nondermatologists for diagnosis of skin disease. However, it is not clear whether this affects medical outcome. Objective: We tested the hypothesis that nondermatologists would be more likely than dermatologists to prescribe combination products for the treatment of common fungal skin infections. Methods: We analyzed office-based physician vis…	1998	10.1016/s0190-9622(98)70400-1	Article	English	51	Smith E.S., Fleischer A.B. Jr., Feldman S.R.	Scopus/Web of Science/PubMed
358	Canine and feline superficial fungal skin infections	[No abstract available]	1997	10.1080/01652176.1997.9694805	Article	English	6	Carlotti D.N.	Scopus/PubMed
359	Composition and physical properties of the Penicillium camemberti mycelium	This paper concerns the Penicillium camemberti (PC) mycelium that grows on French soft cheeses, like Camembert or Brie. According to our knowledge, no author considered the PC as a packaging film around the cheese. Indeed, separation of PC and cheese is not possible because PC is rooted in the cheese crust. In the present study, we grew PC on agar gel and it could easily be separated from the med…	1997	10.1051/lait:1997432	Article	English	4	Bizet C., Desobry S., Fanni J., Hardy J.	Scopus
360	Dermatophytomycoses in children in rural Kenya: The impact of primary health care	In a survey of 5780 children from 13 schools in rural Kisumu District (western Kenya) in 1993, a prevalence rate of dermatophytomycoses of 10.1% was found. Three-quarters of the affected children suffered from tinea capitis (prevalence rate 7.8%), caused by Microsporum audouinii var. langeronii, Trichophyton violaceum and Microsporum canis. In 1994, a dermatology programme within the primary heal…	1997	10.1111/j.1439-0507.1997.tb00171.x	Article	English	36	Schmeller W., Baumgartner S., Dzikus A.	Scopus/Web of Science/PubMed
361	Sterility of filgrastim (G-CSF) in syringes	OBJECTIVE: To determine if the sterility of filgrastim (G-CSF) is maintained for up to 7 days when aseptically transferred from the vial to tuberculin syringes in a laminar air flow environment. DESIGN: The study was conducted in two phases: a validation and an experimental phase. The method was validated by inoculating samples of sterile filgrastim solution with common bacterial and fungal skin …	1996	10.1177/106002809603001105	Article	English	3	Jacobson P.A., West N.J., Spadoni V., Maksym C.J., Pierson C.	Scopus/Web of Science/PubMed
362	Electroanalytical And Bacterial Effect On N-(5-Nitro-2-Furfurylidine)3-Amino-2-Oxazolidone) (Furazolidone) And Its Metal Complexes	A number of metal - furazolidone complexes have been synthesized and screened for antibacterial and antifungal activity. The study reveals the remarkable efficacy of Co(II), Cu(II), Zn(II) and Cd(II) complexes against the various strains of bacteria and fungi, viz., Pseudomonas mangiferae, Bacillus pumillus, and Salmonella typhi suggest a strong possibility of its application for the treatment of…	1995	10.1080/00032719508000020	Article	English	13	Narad S., Nath Mishra N., Pandey P., Kumar A., Pitre K.S.	Scopus/Web of Science
363	Imbalance of immune responses in patients with chronic and widespread fungal skin infection	Fungal infections of the skin are caused by dermatophyte fungi. Infections can be acute and inflammatory or chronic and non-inflammatory; it is believed that cell-mediated immunity is the cornerstone of host defence and is instrumental in the eradication of the infection. We describe here parameters of the immune response of a group of patients who although not immunocompromised, suffered from wi…	1995	10.1111/j.1365-2230.1995.tb01355.x	Article	English	28	Leibovici L., Evron R., Axelrod O., Westerman M., Shalit M., Barak V., Frankenburg S.	Scopus/Web of Science/PubMed
364	Coadministration of ketoconazole to cyclosporin-treated kidney transplant recipients: A prospective randomized study	In this work, 100 living related donor kidney transplant recipients under cyclosporin (CsA) therapy were randomly distributed to two groups. Group 1 were administered ketoconazole, with group 2 serving as the control. Ketoconazole was given orally, 100 mg/day, while the dose of CsA was adjusted for a CsA whole blood trough level of 100-150 ng/ml. Patients and controls were assessed regularly in a…	1995	10.1159/000168892	Article	English	24	Sobh M., El-Agroudy A., Moustafa F., Harras F., El-Bedewy M., Ghoneim M.	Scopus/Web of Science/PubMed
365	Channel catfish, ictalurus punctatus, immunity to saprolegnia sp	Winter kill syndrome is a disease in channel catfish, Ictalurus punctatus, which occurs during the winter months. The syndrome, characterized by cutaneous fungal lesions, has recently been described in detail and is an infectious disease better termed "winter saprolegniosis." A ubiquitous fungus, Saprolegnia sp., is the causative organism responsible for the outbreak of disease in channel catfish…	1994	10.1300/j028v03n01_04	Article	English	19	Bly J.E., Lawson L.A., Abdel-Aziz E.S., Clem L.W.	Scopus
[truncated: 59 more rows]

## Sheet: FungalSkin_duplicates
Item	Title	Abstract	Year	DOI	Document Type	Language	Cited By	Author(s)	Repository	Duplicate Type
[truncated: 558 more rows]

## Sheet: HybridMaterial_unique
Item	Title	Abstract	Year	DOI	Document Type	Language	Cited By	Author(s)	Repository
[truncated: 25 more rows]

## Sheet: HybridMaterial_duplicates
Item	Title	Abstract	Year	DOI	Document Type	Language	Cited By	Author(s)	Repository	Duplicate Type
[truncated: 5 more rows]

## Sheet: Mycocomposite_unique
Item	Title	Abstract	Year	DOI	Document Type	Language	Cited By	Author(s)	Repository
[truncated: 141 more rows]

## Sheet: Mycocomposite_duplicates
Item	Title	Abstract	Year	DOI	Document Type	Language	Cited By	Author(s)	Repository	Duplicate Type
[truncated: 85 more rows]

[truncated: 1 more sheets: Included]
