# Supplementary material for: Current situation and future perspectives for the use of fungi in the biomaterial industry and proposal for a new classification of fungal-derived materials
Source: PeerJ journal article supplement (doi:10.7717/peerj-matsci.31), 2023-08-29
Supplement: TableS3_laccase_metadata.xlsx [file TableS3_laccase_metadata.xlsx]

## Sheet: laccase_metadata
GenBank	Species	Order	Sequence
MH857894	Abortiporus_biennis	Polyporales	Abortiporus_biennis_culture_CBS:373.59_strain_CBS_373.59_small_subunit_ribosomal_RNA_gene,_partial_sequence;_internal_transcribed_spacer_1,_5.8S_ribosomal_RNA_gene,_and_internal_transcribed_spacer_2,_complete_sequence;_and_large_subunit_ribosomal_RNA_gene,_partial_sequence
OP470039	Abortiporus_biennis	Polyporales	Abortiporus_biennis_isolate_MO479976_internal_transcribed_spacer_1,_partial_sequence;_5.8S_ribosomal_RNA_gene_and_internal_transcribed_spacer_2,_complete_sequence;_and_large_subunit_ribosomal_RNA_gene,_partial_sequence
MH856149	Agaricus_bisporus	Agaricales	Agaricus_bisporus_culture_CBS:152.46_strain_CBS_152.46_internal_transcribed_spacer_1,_partial_sequence;_5.8S_ribosomal_RNA_gene,_complete_sequence;_and_internal_transcribed_spacer_2,_partial_sequence
MH856840	Agaricus_bisporus	Agaricales	Agaricus_bisporus_culture_CBS:243.51_strain_CBS_243.51_small_subunit_ribosomal_RNA_gene,_partial_sequence;_internal_transcribed_spacer_1,_5.8S_ribosomal_RNA_gene,_and_internal_transcribed_spacer_2,_complete_sequence;_and_large_subunit_ribosomal_RNA_gene,_partial_sequence
KJ010869	Agaricus_blazei	Agaricales	Agaricus_blazei_strain_U4-3_internal_transcribed_spacer_1,_partial_sequence;_5.8S_ribosomal_RNA_gene,_complete_sequence;_and_internal_transcribed_spacer_2,_partial_sequence
ON557685	Agaricus_blazei	Agaricales	Agaricus_blazei_voucher_HGASMF01-14267_internal_transcribed_spacer_1,_partial_sequence;_5.8S_ribosomal_RNA_gene,_complete_sequence;_and_internal_transcribed_spacer_2,_partial_sequence
AY818650	Agaricus_brasiliensis	Agaricales	Agaricus_brasiliensis_18S_ribosomal_RNA_gene,_partial_sequence;_internal_transcribed_spacer_1,_5.8S_ribosomal_RNA_gene,_and_internal_transcribed_spacer_2,_complete_sequence;_and_28S_ribosomal_RNA_gene,_partial_sequence
AJ884652	Agaricus_brasiliensis	Agaricales	Agaricus_brasiliensis_ITS1,_5.8S_rRNA_gene_and_ITS2,_specimen_voucher_HAI_herbarium_0978-1
MH861499	Amylostereum_areolatum	Russulales	Amylostereum_areolatum_culture_CBS:305.82_strain_CBS_305.82_internal_transcribed_spacer_1,_partial_sequence;_5.8S_ribosomal_RNA_gene,_complete_sequence;_and_internal_transcribed_spacer_2,_partial_sequence
AF218389	Amylostereum_areolatum	Russulales	Amylostereum_areolatum_internal_transcribed_spacer_1,_5.8S_ribosomal_RNA_gene,_and_internal_transcribed_spacer_2,_complete_sequence
AF126888	Antrodiella_faginea	Polyporales	Antrodiella_faginea_16S_small_subunit_ribosomal_RNA,_partial_sequence;_internal_transcribed_spacer_1;_5.8S_ribosomal_RNA_gene,_complete_sequence;_internal_transcribed_spacer_2;_and_28S_large_subunit_ribosomal_RNA,_partial_sequence
ON882049	Antrodiella_faginea	Polyporales	Antrodiella_faginea_isolate_MOGU_169-19_internal_transcribed_spacer_1,_partial_sequence;_5.8S_ribosomal_RNA_gene_and_internal_transcribed_spacer_2,_complete_sequence;_and_large_subunit_ribosomal_RNA_gene,_partial_sequence
AF126895	Antrodiella_pallasii	Polyporales	Antrodiella_pallasii_16S_small_subunit_ribosomal_RNA,_partial_sequence;_internal_transcribed_spacer_1;_5.8S_ribosomal_RNA_gene,_complete_sequence;_internal_transcribed_spacer_2;_and_28S_large_subunit_ribosomal_RNA,_partial_sequence
ON413696	Antrodiella_pallasii	Polyporales	Antrodiella_pallasii_voucher_Dai_23026_internal_transcribed_spacer_1,_partial_sequence;_5.8S_ribosomal_RNA_gene_and_internal_transcribed_spacer_2,_complete_sequence;_and_large_subunit_ribosomal_RNA_gene,_partial_sequence
MH855148	Armillaria_mellea	Agaricales	Armillaria_mellea_culture_CBS:106.31_strain_CBS_106.31_small_subunit_ribosomal_RNA_gene,_partial_sequence;_internal_transcribed_spacer_1,_5.8S_ribosomal_RNA_gene,_and_internal_transcribed_spacer_2,_complete_sequence;_and_large_subunit_ribosomal_RNA_gene,_partial_sequence
AB509500	Armillaria_mellea	Agaricales	Armillaria_mellea_gene_for_5.8S_ribosomal_RNA,_internal_transcribed_spacer_2_and_28S_ribosomal_RNA,_partial_sequence,_strain:_386-43
MH855945	Auricularia_auricula-judae	Auriculariales	Auricularia_auricula-judae_culture_CBS:193.38_strain_CBS_193.38_small_subunit_ribosomal_RNA_gene,_partial_sequence;_internal_transcribed_spacer_1,_5.8S_ribosomal_RNA_gene,_and_internal_transcribed_spacer_2,_complete_sequence;_and_large_subunit_ribosomal_RNA_gene,_partial_sequence
KR336695	Auricularia_auricula-judae	Auriculariales	Auricularia_auricula-judae_voucher_MFLU_130394_internal_transcribed_spacer_1,_partial_sequence;_5.8S_ribosomal_RNA_gene_and_internal_transcribed_spacer_2,_complete_sequence;_and_28S_ribosomal_RNA_gene,_partial_sequence
MH857085	Bjerkandera_adusta	Polyporales	Bjerkandera_adusta_culture_CBS:371.52_strain_CBS_371.52_small_subunit_ribosomal_RNA_gene,_partial_sequence;_internal_transcribed_spacer_1,_5.8S_ribosomal_RNA_gene,_and_internal_transcribed_spacer_2,_complete_sequence;_and_large_subunit_ribosomal_RNA_gene,_partial_sequence
MF687187	Bjerkandera_adusta	Polyporales	Bjerkandera_adusta_culture_ICMP:20592_small_subunit_ribosomal_RNA_gene,_partial_sequence;_internal_transcribed_spacer_1,_5.8S_ribosomal_RNA_gene,_and_internal_transcribed_spacer_2,_complete_sequence;_and_large_subunit_ribosomal_RNA_gene,_partial_sequence
AY789083	Calocera_cornea	Dacrymycetales	Calocera_cornea_isolate_AFTOL-ID_438_18S_ribosomal_RNA_gene,_partial_sequence;_internal_transcribed_spacer_1,_5.8S_ribosomal_RNA_gene,_and_internal_transcribed_spacer_2,_complete_sequence;_and_25S_ribosomal_RNA_gene,_partial_sequence
MW740315	Calocera_cornea	Dacrymycetales	Calocera_cornea_strain_HHB-19105_small_subunit_ribosomal_RNA_gene,_partial_sequence;_internal_transcribed_spacer_1,_5.8S_ribosomal_RNA_gene,_and_internal_transcribed_spacer_2,_complete_sequence;_and_large_subunit_ribosomal_RNA_gene,_partial_sequence
MH856425	Ceriporiopsis_rivulosa	Polyporales	Ceriporiopsis_rivulosa_culture_CBS:433.48_strain_CBS_433.48_small_subunit_ribosomal_RNA_gene,_partial_sequence;_internal_transcribed_spacer_1,_5.8S_ribosomal_RNA_gene,_and_internal_transcribed_spacer_2,_complete_sequence;_and_large_subunit_ribosomal_RNA_gene,_partial_sequence
FJ496693	Ceriporiopsis_rivulosa	Polyporales	Ceriporiopsis_rivulosa_strain_KCTC_6892_18S_ribosomal_RNA_gene,_partial_sequence;_internal_transcribed_spacer_1,_5.8S_ribosomal_RNA_gene,_and_internal_transcribed_spacer_2,_complete_sequence;_and_28S_ribosomal_RNA_gene,_partial_sequence
FJ545252	Ceriporiopsis_subvermispora	Polyporales	Ceriporiopsis_subvermispora_strain_ATCC_90467_18S_ribosomal_RNA_gene,_partial_sequence;_internal_transcribed_spacer_1,_5.8S_ribosomal_RNA_gene,_and_internal_transcribed_spacer_2,_complete_sequence;_and_28S_ribosomal_RNA_gene,_partial_sequence
FJ349621	Ceriporiopsis_subvermispora	Polyporales	Ceriporiopsis_subvermispora_strain_CBS_347.63_internal_transcribed_spacer_1,_partial_sequence;_5.8S_ribosomal_RNA_gene_and_internal_transcribed_spacer_2,_complete_sequence;_and_28S_ribosomal_RNA_gene,_partial_sequence
MH855029	Cerrena_unicolor	Polyporales	Cerrena_unicolor_culture_CBS:154.29_strain_CBS_154.29_small_subunit_ribosomal_RNA_gene,_partial_sequence;_internal_transcribed_spacer_1,_5.8S_ribosomal_RNA_gene,_and_internal_transcribed_spacer_2,_complete_sequence;_and_large_subunit_ribosomal_RNA_gene,_partial_sequence
OL472336	Cerrena_unicolor	Polyporales	Cerrena_unicolor_internal_transcribed_spacer_1,_partial_sequence;_5.8S_ribosomal_RNA_gene,_complete_sequence;_and_internal_transcribed_spacer_2,_partial_sequence
MH855076	Climacocystis_borealis	Polyporales	Climacocystis_borealis_culture_CBS:312.29_strain_CBS_312.29_small_subunit_ribosomal_RNA_gene,_partial_sequence;_internal_transcribed_spacer_1,_5.8S_ribosomal_RNA_gene,_and_internal_transcribed_spacer_2,_complete_sequence;_and_large_subunit_ribosomal_RNA_gene,_partial_sequence
KT874990	Climacocystis_borealis	Polyporales	Climacocystis_borealis_voucher_HC-PNNT-141_partial_18S_ribosomal_RNA_gene,_partial_sequence;_internal_transcribed_spacer_1,_5.8S_ribosomal_RNA_gene,_and_internal_transcribed_spacer_2,_complete_sequence;_and_partial_25S_ribosomal_RNA_gene,_partial_sequence
AJ419198	Coniophora_puteana	Boletales	Coniophora_puteana_18S_rRNA_gene,_5.8S_rRNA_gene,_28S_rRNA_gene,_internal_transcribed_spacer_1_(ITS1)_and_internal_transcribed_spacer_2_(ITS2),_isolate_MA-Fungi_10672
MH855248	Coniophora_puteana	Boletales	Coniophora_puteana_culture_CBS:148.32_strain_CBS_148.32_small_subunit_ribosomal_RNA_gene,_partial_sequence;_internal_transcribed_spacer_1,_5.8S_ribosomal_RNA_gene,_and_internal_transcribed_spacer_2,_complete_sequence;_and_large_subunit_ribosomal_RNA_gene,_partial_sequence
MH856803	Coprinellus_congregatus	Agaricales	Coprinellus_congregatus_culture_CBS:181.51_strain_CBS_181.51_small_subunit_ribosomal_RNA_gene,_partial_sequence;_internal_transcribed_spacer_1_and_5.8S_ribosomal_RNA_gene,_complete_sequence;_and_internal_transcribed_spacer_2,_partial_sequence
GU227703	Coprinellus_congregatus	Agaricales	Coprinellus_congregatus_strain_SZMC-NL-0588_18S_ribosomal_RNA_gene,_partial_sequence;_internal_transcribed_spacer_1,_5.8S_ribosomal_RNA_gene,_and_internal_transcribed_spacer_2,_complete_sequence;_and_28S_ribosomal_RNA_gene,_partial_sequence
MH862630	Coprinopsis_cinerea	Agaricales	Coprinopsis_cinerea_culture_CBS:106.97_strain_CBS_106.97_small_subunit_ribosomal_RNA_gene,_partial_sequence;_internal_transcribed_spacer_1,_5.8S_ribosomal_RNA_gene,_and_internal_transcribed_spacer_2,_complete_sequence;_and_large_subunit_ribosomal_RNA_gene,_partial_sequence
MH862274	Coprinopsis_cinerea	Agaricales	Coprinopsis_cinerea_culture_CBS:519.91_strain_CBS_519.91_internal_transcribed_spacer_1,_partial_sequence;_5.8S_ribosomal_RNA_gene,_complete_sequence;_and_internal_transcribed_spacer_2,_partial_sequence
EU030182	Coriolopsis_caperata	Polyporales	Coriolopsis_caperata_strain_CRM77_internal_transcribed_spacer_1,_partial_sequence;_5.8S_ribosomal_RNA_gene,_complete_sequence;_and_internal_transcribed_spacer_2,_partial_sequence
KR078279	Coriolopsis_caperata	Polyporales	Coriolopsis_caperata_voucher_UOC_WASNP_W22_18S_ribosomal_RNA_gene,_partial_sequence;_internal_transcribed_spacer_1,_5.8S_ribosomal_RNA_gene,_and_internal_transcribed_spacer_2,_complete_sequence;_and_28S_ribosomal_RNA_gene,_partial_sequence
MZ666830	Coriolopsis_gallica	Polyporales	Coriolopsis_gallica_bio-material_iNAT:62982977_small_subunit_ribosomal_RNA_gene,_partial_sequence;_internal_transcribed_spacer_1,_5.8S_ribosomal_RNA_gene,_and_internal_transcribed_spacer_2,_complete_sequence;_and_large_subunit_ribosomal_RNA_gene,_partial_sequence
MH855592	Coriolopsis_gallica	Polyporales	Coriolopsis_gallica_culture_CBS:428.34_strain_CBS_428.34_internal_transcribed_spacer_1,_partial_sequence;_5.8S_ribosomal_RNA_gene_and_internal_transcribed_spacer_2,_complete_sequence;_and_large_subunit_ribosomal_RNA_gene,_partial_sequence
MK247919	Coriolopsis_trogii	Polyporales	Coriolopsis_trogii_isolate_G318_small_subunit_ribosomal_RNA_gene,_partial_sequence;_internal_transcribed_spacer_1_and_5.8S_ribosomal_RNA_gene,_complete_sequence;_and_internal_transcribed_spacer_2,_partial_sequence
OQ450434	Coriolopsis_trogii	Polyporales	Coriolopsis_trogii_voucher_KM096_internal_transcribed_spacer_1,_partial_sequence;_5.8S_ribosomal_RNA_gene_and_internal_transcribed_spacer_2,_complete_sequence;_and_large_subunit_ribosomal_RNA_gene,_partial_sequence
OK393673	Cyathus_bulleri	Agaricales	Cyathus_bulleri_isolate_SA16_small_subunit_ribosomal_RNA_gene,_partial_sequence;_internal_transcribed_spacer_1_and_5.8S_ribosomal_RNA_gene,_complete_sequence;_and_internal_transcribed_spacer_2,_partial_sequence
KT251038	Dacryopinax_primogenitus	Dacrymycetales	Dacryopinax_primogenitus_voucher_MIN:862738_internal_transcribed_spacer_1,_partial_sequence;_5.8S_ribosomal_RNA_gene,_complete_sequence;_and_internal_transcribed_spacer_2,_partial_sequence
EU768809	Daedalea_quercina	Polyporales	Daedalea_quercina_strain_DSM_4953_18S_ribosomal_RNA_gene,_partial_sequence;_internal_transcribed_spacer_1,_5.8S_ribosomal_RNA_gene,_and_internal_transcribed_spacer_2,_complete_sequence;_and_28S_ribosomal_RNA_gene,_partial_sequence
MK991837	Daedalea_quercina	Polyporales	Daedalea_quercina_voucher_JLF1738_small_subunit_ribosomal_RNA_gene,_partial_sequence;_internal_transcribed_spacer_1_and_5.8S_ribosomal_RNA_gene,_complete_sequence;_and_internal_transcribed_spacer_2,_partial_sequence
MH855594	Dichomitus_squalens	Polyporales	Dichomitus_squalens_culture_CBS:432.34_strain_CBS_432.34_small_subunit_ribosomal_RNA_gene,_partial_sequence;_internal_transcribed_spacer_1,_5.8S_ribosomal_RNA_gene,_and_internal_transcribed_spacer_2,_complete_sequence;_and_large_subunit_ribosomal_RNA_gene,_partial_sequence
OL436840	Dichomitus_squalens	Polyporales	Dichomitus_squalens_voucher_DK15_84_small_subunit_ribosomal_RNA_gene,_partial_sequence;_internal_transcribed_spacer_1,_5.8S_ribosomal_RNA_gene,_and_internal_transcribed_spacer_2,_complete_sequence;_and_large_subunit_ribosomal_RNA_gene,_partial_sequence
AF218402	Echinodontium_taxodii	Russulales	Echinodontium_taxodii_internal_transcribed_spacer_1,_5.8S_ribosomal_RNA_gene,_and_internal_transcribed_spacer_2,_complete_sequence
EF422215	Echinodontium_taxodii	Russulales	Echinodontium_taxodii_small_subunit_ribosomal_RNA_gene,_partial_sequence;_internal_transcribed_spacer_1,_5.8S_ribosomal_RNA_gene,_and_internal_transcribed_spacer_2,_complete_sequence;_and_large_subunit_ribosomal_RNA_gene,_partial_sequence
OL142286	Fibroporia_radiculosa_	Polyporales	Fibroporia_radiculosa_bio-material_MUOB:299505_small_subunit_ribosomal_RNA_gene,_partial_sequence;_internal_transcribed_spacer_1,_5.8S_ribosomal_RNA_gene,_and_internal_transcribed_spacer_2,_complete_sequence;_and_large_subunit_ribosomal_RNA_gene,_partial_sequence
JX157584	Fibroporia_radiculosa_	Polyporales	Fibroporia_radiculosa_voucher_DBB2_18S_ribosomal_RNA_gene,_partial_sequence;_internal_transcribed_spacer_1,_5.8S_ribosomal_RNA_gene,_and_internal_transcribed_spacer_2,_complete_sequence;_and_28S_ribosomal_RNA_gene,_partial_sequence
KY474052	Fistulina_hepatica_	Agaricales	Fistulina_hepatica_culture_FCL<POL>:457_small_subunit_ribosomal_RNA_gene,_partial_sequence;_internal_transcribed_spacer_1,_5.8S_ribosomal_RNA_gene,_and_internal_transcribed_spacer_2,_complete_sequence;_and_large_subunit_ribosomal_RNA_gene,_partial_sequence
JN043326	Fistulina_hepatica_	Agaricales	Fistulina_hepatica_strain_NAAS05870_internal_transcribed_spacer_1,_partial_sequence;_5.8S_ribosomal_RNA_gene,_complete_sequence;_and_internal_transcribed_spacer_2,_partial_sequence
FJ889519	Flammulina_elastica	Agaricales	Flammulina_elastica_voucher_SAV-F-1445_18S_ribosomal_RNA_gene,_partial_sequence;_internal_transcribed_spacer_1,_5.8S_ribosomal_RNA_gene,_and_internal_transcribed_spacer_2,_complete_sequence;_and_28S_ribosomal_RNA_gene,_partial_sequence
KY200204	Flammulina_elastica	Agaricales	Flammulina_elastica_voucher_WU21893_small_subunit_ribosomal_RNA_gene,_partial_sequence;_internal_transcribed_spacer_1_and_5.8S_ribosomal_RNA_gene,_complete_sequence;_and_internal_transcribed_spacer_2,_partial_sequence
EU191068	Flammulina_velutipes	Agaricales	Flammulina_velutipes_voucher_TENN59017_18S_ribosomal_RNA_gene,_partial_sequence;_internal_transcribed_spacer_1,_5.8S_ribosomal_RNA_gene,_and_internal_transcribed_spacer_2,_complete_sequence;_and_large_subunit_ribosomal_RNA_gene,_partial_sequence
KY200203	Flammulina_velutipes	Agaricales	Flammulina_velutipes_voucher_WU19854_small_subunit_ribosomal_RNA_gene,_partial_sequence;_internal_transcribed_spacer_1_and_5.8S_ribosomal_RNA_gene,_complete_sequence;_and_internal_transcribed_spacer_2,_partial_sequence
JX183713	Fomes_fomentarius	Polyporales	Fomes_fomentarius_strain_DAOM129034_internal_transcribed_spacer_1,_partial_sequence;_5.8S_ribosomal_RNA_gene,_complete_sequence;_and_internal_transcribed_spacer_2,_partial_sequence
JX843719	Fomes_fomentarius	Polyporales	Fomes_fomentarius_strain_UAMH:11654_internal_transcribed_spacer_1,_partial_sequence;_5.8S_ribosomal_RNA_gene,_complete_sequence;_and_internal_transcribed_spacer_2,_partial_sequence
OM530257	Fomitiporia_mediterranea	Hymenocheatales	Fomitiporia_mediterranea_isolate_MOGU_079-18_small_subunit_ribosomal_RNA_gene,_partial_sequence;_internal_transcribed_spacer_1,_5.8S_ribosomal_RNA_gene,_and_internal_transcribed_spacer_2,_complete_sequence;_and_large_subunit_ribosomal_RNA_gene,_partial_sequence
AY340029	Fomitiporia_mediterranea	Hymenocheatales	Fomitiporia_mediterranea_strain_TW7.98a_18S_ribosomal_RNA_gene,_partial_sequence;_internal_transcribed_spacer_1,_5.8S_ribosomal_RNA_gene,_and_internal_transcribed_spacer_2,_complete_sequence;_and_28S_ribosomal_RNA_gene,_partial_sequence
MF161215	Fomitopsis_betulina	Polyporales	Fomitopsis_betulina_isolate_BHI-F304a_small_subunit_ribosomal_RNA_gene,_partial_sequence;_internal_transcribed_spacer_1,_5.8S_ribosomal_RNA_gene,_and_internal_transcribed_spacer_2,_complete_sequence;_and_large_subunit_ribosomal_RNA_gene,_partial_sequence
MH855567	Fomitopsis_palustris	Polyporales	Fomitopsis_palustris_culture_CBS:363.34_strain_CBS_363.34_small_subunit_ribosomal_RNA_gene,_partial_sequence;_internal_transcribed_spacer_1,_5.8S_ribosomal_RNA_gene,_and_internal_transcribed_spacer_2,_complete_sequence;_and_large_subunit_ribosomal_RNA_gene,_partial_sequence
DQ491404	Fomitopsis_palustris	Polyporales	Fomitopsis_palustris_strain_CBS_283.65_18S_ribosomal_RNA_gene,_partial_sequence;_internal_transcribed_spacer_1,_5.8S_ribosomal_RNA_gene,_and_internal_transcribed_spacer_2,_complete_sequence;_and_28S_ribosomal_RNA_gene,_partial_sequence
MH856207	Fomitopsis_pinicola	Polyporales	Fomitopsis_pinicola_culture_CBS:177.47_strain_CBS_177.47_internal_transcribed_spacer_1,_partial_sequence;_5.8S_ribosomal_RNA_gene_and_internal_transcribed_spacer_2,_complete_sequence;_and_large_subunit_ribosomal_RNA_gene,_partial_sequence
MH860248	Fomitopsis_pinicola	Polyporales	Fomitopsis_pinicola_culture_CBS:523.71_strain_CBS_523.71_small_subunit_ribosomal_RNA_gene,_partial_sequence;_internal_transcribed_spacer_1,_5.8S_ribosomal_RNA_gene,_and_internal_transcribed_spacer_2,_complete_sequence;_and_large_subunit_ribosomal_RNA_gene,_partial_sequence
NR_176127	Fomitopsis_subpinicola	Polyporales	Fomitopsis_subpinicola_BJFC_010729_ITS_region;_from_TYPE_material
MN148252	Fomitopsis_subpinicola	Polyporales	Fomitopsis_subpinicola_voucher_Dai_11206_internal_transcribed_spacer_1,_partial_sequence;_5.8S_ribosomal_RNA_gene,_complete_sequence;_and_internal_transcribed_spacer_2,_partial_sequence
JQ520161	Ganoderma_applanatum	Polyporales	Ganoderma_applanatum_strain_ATCC_44053_18S_ribosomal_RNA_gene,_partial_sequence;_internal_transcribed_spacer_1,_5.8S_ribosomal_RNA_gene,_and_internal_transcribed_spacer_2,_complete_sequence;_and_28S_ribosomal_RNA_gene,_partial_sequence
MZ665521	Ganoderma_applanatum	Polyporales	Ganoderma_applanatum_strain_G124_internal_transcribed_spacer_1,_partial_sequence;_5.8S_ribosomal_RNA_gene_and_internal_transcribed_spacer_2,_complete_sequence;_and_large_subunit_ribosomal_RNA_gene,_partial_sequence
MK713558	Ganoderma_boninense	Polyporales	Ganoderma_boninense_isolate_GbHap4_internal_transcribed_spacer_1,_partial_sequence;_5.8S_ribosomal_RNA_gene_and_internal_transcribed_spacer_2,_complete_sequence;_and_large_subunit_ribosomal_RNA_gene,_partial_sequence
OR140582	Ganoderma_boninense	Polyporales	Ganoderma_boninense_isolate_HKYZ2023052002_internal_transcribed_spacer_1,_partial_sequence;_5.8S_ribosomal_RNA_gene_and_internal_transcribed_spacer_2,_complete_sequence;_and_large_subunit_ribosomal_RNA_gene,_partial_sequence
JN596323	Ganoderma_fornicatum	Polyporales	Ganoderma_fornicatum_isolate_G142_18S_ribosomal_RNA_gene,_partial_sequence;_internal_transcribed_spacer_1_and_5.8S_ribosomal_RNA_gene,_complete_sequence;_and_internal_transcribed_spacer_2,_partial_sequence
FJ655473	Ganoderma_fornicatum	Polyporales	Ganoderma_fornicatum_isolate_KL26_internal_transcribed_spacer_1,_partial_sequence;_5.8S_ribosomal_RNA_gene,_complete_sequence;_and_internal_transcribed_spacer_2,_partial_sequence
OM530255	Ganoderma_lucidum	Polyporales	Ganoderma_lucidum_isolate_MOGU_137-19_small_subunit_ribosomal_RNA_gene,_partial_sequence;_internal_transcribed_spacer_1,_5.8S_ribosomal_RNA_gene,_and_internal_transcribed_spacer_2,_complete_sequence;_and_large_subunit_ribosomal_RNA_gene,_partial_sequence
ON196275	Ganoderma_lucidum	Polyporales	Ganoderma_lucidum_voucher_TS57_internal_transcribed_spacer_1,_partial_sequence;_5.8S_ribosomal_RNA_gene_and_internal_transcribed_spacer_2,_complete_sequence;_and_large_subunit_ribosomal_RNA_gene,_partial_sequence
JQ520215	Ganoderma_tsugae	Polyporales	Ganoderma_tsugae_strain_ATCC_64795_18S_ribosomal_RNA_gene,_partial_sequence;_internal_transcribed_spacer_1,_5.8S_ribosomal_RNA_gene,_and_internal_transcribed_spacer_2,_complete_sequence;_and_28S_ribosomal_RNA_gene,_partial_sequence
MG654334	Ganoderma_tsugae	Polyporales	Ganoderma_tsugae_voucher_UMNWI2_internal_transcribed_spacer_1,_partial_sequence;_5.8S_ribosomal_RNA_gene,_complete_sequence;_and_internal_transcribed_spacer_2,_partial_sequence
FJ491972	Ganoderma_weberianum	Polyporales	Ganoderma_weberianum_isolate_KL15_18S_ribosomal_RNA_gene,_partial_sequence;_internal_transcribed_spacer_1,_5.8S_ribosomal_RNA_gene,_and_internal_transcribed_spacer_2,_complete_sequence;_and_28S_ribosomal_RNA_gene,_partial_sequence
MK603804	Ganoderma_weberianum	Polyporales	Ganoderma_weberianum_strain_CBS_219.36_internal_transcribed_spacer_1,_partial_sequence;_5.8S_ribosomal_RNA_gene_and_internal_transcribed_spacer_2,_complete_sequence;_and_large_subunit_ribosomal_RNA_gene,_partial_sequence
MH858308	Gelatoporia_subvermispora	Polyporales	Gelatoporia_subvermispora_culture_CBS:347.63_strain_CBS_347.63_internal_transcribed_spacer_1,_partial_sequence;_5.8S_ribosomal_RNA_gene_and_internal_transcribed_spacer_2,_complete_sequence;_and_large_subunit_ribosomal_RNA_gene,_partial_sequence
MH856645	Gloeophyllum_trabeum	Gloeophyllales	Gloeophyllum_trabeum_culture_CBS:318.50_strain_CBS_318.50_small_subunit_ribosomal_RNA_gene,_partial_sequence;_internal_transcribed_spacer_1,_5.8S_ribosomal_RNA_gene,_and_internal_transcribed_spacer_2,_complete_sequence;_and_large_subunit_ribosomal_RNA_gene,_partial_sequence
KU729035	Gloeophyllum_trabeum	Gloeophyllales	Gloeophyllum_trabeum_strain_ATCC_11539_small_subunit_ribosomal_RNA_gene,_partial_sequence;_internal_transcribed_spacer_1,_5.8S_ribosomal_RNA_gene,_and_internal_transcribed_spacer_2,_complete_sequence;_and_large_subunit_ribosomal_RNA_gene,_partial_sequence
AY854084	Grifola_frondosa	Polyporales	Grifola_frondosa_isolate_AFTOL-ID_701_18S_ribosomal_RNA_gene,_partial_sequence;_internal_transcribed_spacer_1,_5.8S_ribosomal_RNA_gene,_and_internal_transcribed_spacer_2,_complete_sequence;_and_25S_ribosomal_RNA_gene,_partial_sequence
GU731562	Grifola_frondosa	Polyporales	Grifola_frondosa_strain_CIRM-BRFM_1162_18S_ribosomal_RNA_gene,_partial_sequence;_internal_transcribed_spacer_1,_5.8S_ribosomal_RNA_gene,_and_internal_transcribed_spacer_2,_complete_sequence;_and_28S_ribosomal_RNA_gene,_partial_sequence
AY534584	Hericium_coralloides	Russulales	Hericium_coralloides_strain_ATCC_52480_18S_ribosomal_RNA_gene,_partial_sequence;_internal_transcribed_spacer_1,_5.8S_ribosomal_RNA_gene,_and_internal_transcribed_spacer_2,_complete_sequence;_and_28S_ribosomal_RNA_gene,_partial_sequence
KY432832	Hericium_coralloides	Russulales	Hericium_coralloides_voucher_NYBG:0011_small_subunit_ribosomal_RNA_gene,_partial_sequence;_internal_transcribed_spacer_1,_5.8S_ribosomal_RNA_gene,_and_internal_transcribed_spacer_2,_complete_sequence;_and_large_subunit_ribosomal_RNA_gene,_partial_sequence
MH854964	Heterobasidion_annosum	Russulales	Heterobasidion_annosum_culture_CBS:169.28_strain_CBS_169.28_small_subunit_ribosomal_RNA_gene,_partial_sequence;_internal_transcribed_spacer_1,_5.8S_ribosomal_RNA_gene,_and_internal_transcribed_spacer_2,_complete_sequence;_and_large_subunit_ribosomal_RNA_gene,_partial_sequence
FJ627534	Heterobasidion_annosum	Russulales	Heterobasidion_annosum_isolate_90211/2_internal_transcribed_spacer_1_and_5.8S_ribosomal_RNA_gene,_partial_sequence
GU187523	Hydnomerulius_pinastri	Boletales	Hydnomerulius_pinastri_CFMR:MD312_18S_small_subunit_ribosomal_RNA_gene,_partial_sequence;_internal_transcribed_spacer_1,_5.8S_ribosomal_RNA_gene,_and_internal_transcribed_spacer_2,_complete_sequence;_and_28S_large_subunit_ribosomal_RNA_gene,_partial_sequence
MT537017	Hydnomerulius_pinastri	Boletales	Hydnomerulius_pinastri_strain_N.L._Bougher_NLB_1160_internal_transcribed_spacer_1,_partial_sequence;_5.8S_ribosomal_RNA_gene_and_internal_transcribed_spacer_2,_complete_sequence;_and_large_subunit_ribosomal_RNA_gene,_partial_sequence
MT076081	Hypholoma_frowardii	Agaricales	Hypholoma_frowardii_isolate_B2_voucher_002_contig_B2_Hypholoma_frowardii_internal_transcribed_spacer_1,_partial_sequence;_5.8S_ribosomal_RNA_gene,_complete_sequence;_and_internal_transcribed_spacer_2,_partial_sequence
KY352652	Hypholoma_frowardii	Agaricales	Hypholoma_frowardii_strain_TFB8348_small_subunit_ribosomal_RNA_gene,_partial_sequence;_internal_transcribed_spacer_1,_5.8S_ribosomal_RNA_gene,_and_internal_transcribed_spacer_2,_complete_sequence;_and_large_subunit_ribosomal_RNA_gene,_partial_sequence
OQ560339	Hypsizygus_marmoreus	Agaricales	Hypsizygus_marmoreus_voucher_L4550_small_subunit_ribosomal_RNA_gene,_partial_sequence;_internal_transcribed_spacer_1,_5.8S_ribosomal_RNA_gene,_and_internal_transcribed_spacer_2,_complete_sequence;_and_large_subunit_ribosomal_RNA_gene,_partial_sequence
KU836541	Hypsizygus_marmoreus	Agaricales	Hypsizygus_marmoreus_voucher_ZJ0001LZS03_internal_transcribed_spacer_1,_partial_sequence;_5.8S_ribosomal_RNA_gene,_complete_sequence;_and_internal_transcribed_spacer_2,_partial_sequence
OM530261	Irpex_lacteus	Polyporales	Irpex_lacteus_isolate_MOGU_076-18_small_subunit_ribosomal_RNA_gene,_partial_sequence;_internal_transcribed_spacer_1,_5.8S_ribosomal_RNA_gene,_and_internal_transcribed_spacer_2,_complete_sequence;_and_large_subunit_ribosomal_RNA_gene,_partial_sequence
MN844874	Irpex_lacteus	Polyporales	Irpex_lacteus_voucher_KoLRI_EL006204_internal_transcribed_spacer_1,_partial_sequence;_5.8S_ribosomal_RNA_gene_and_internal_transcribed_spacer_2,_complete_sequence;_and_large_subunit_ribosomal_RNA_gene,_partial_sequence
MH862432	Laetiporus_sulphureus	Agaricales	Laetiporus_sulphureus_culture_CBS:463.93_strain_CBS_463.93_internal_transcribed_spacer_1,_partial_sequence;_5.8S_ribosomal_RNA_gene_and_internal_transcribed_spacer_2,_complete_sequence;_and_large_subunit_ribosomal_RNA_gene,_partial_sequence
DQ221108	Laetiporus_sulphureus	Agaricales	Laetiporus_sulphureus_isolate_AFTOL-ID_769_internal_transcribed_spacer_1,_5.8S_ribosomal_RNA_gene,_and_internal_transcribed_spacer_2,_complete_sequence
MH862235	Lentinula_edodes	Agaricales	Lentinula_edodes_culture_CBS:530.90_strain_CBS_530.90_internal_transcribed_spacer_1,_partial_sequence;_5.8S_ribosomal_RNA_gene_and_internal_transcribed_spacer_2,_complete_sequence;_and_large_subunit_ribosomal_RNA_gene,_partial_sequence
MW508993	Lentinula_edodes	Agaricales	Lentinula_edodes_isolate_GAN059_small_subunit_ribosomal_RNA_gene,_partial_sequence;_internal_transcribed_spacer_1,_5.8S_ribosomal_RNA_gene,_and_internal_transcribed_spacer_2,_complete_sequence;_and_large_subunit_ribosomal_RNA_gene,_partial_sequence
MG198769	Lentinus_sajor-caju	Polyporales	Lentinus_sajor-caju_isolate_MCCT185_small_subunit_ribosomal_RNA_gene,_partial_sequence;_internal_transcribed_spacer_1_and_5.8S_ribosomal_RNA_gene,_complete_sequence;_and_internal_transcribed_spacer_2,_partial_sequence
GU207308	Lentinus_sajor-caju	Polyporales	Lentinus_sajor-caju_isolate_TFB11739_18S_ribosomal_RNA_gene,_partial_sequence;_internal_transcribed_spacer_1,_5.8S_ribosomal_RNA_gene,_and_internal_transcribed_spacer_2,_complete_sequence;_and_28S_ribosomal_RNA_gene,_partial_sequence
MH856001	Lentinus_tigrinus	Polyporales	Lentinus_tigrinus_culture_CBS:249.39_strain_CBS_249.39_small_subunit_ribosomal_RNA_gene,_partial_sequence;_internal_transcribed_spacer_1,_5.8S_ribosomal_RNA_gene,_and_internal_transcribed_spacer_2,_complete_sequence;_and_large_subunit_ribosomal_RNA_gene,_partial_sequence
GU207270	Lentinus_tigrinus	Polyporales	Lentinus_tigrinus_isolate_RLG9953_18S_ribosomal_RNA_gene,_partial_sequence;_internal_transcribed_spacer_1,_5.8S_ribosomal_RNA_gene,_and_internal_transcribed_spacer_2,_complete_sequence;_and_28S_ribosomal_RNA_gene,_partial_sequence
JN645081	Lenzites_betulinus	Polyporales	Lenzites_betulinus_culture-collection_CBS:695.94_internal_transcribed_spacer_1_partial_sequence,_partial_sequence;_5.8S_ribosomal_RNA_gene_and_internal_transcribed_spacer_2,_complete_sequence;_and_28S_ribosomal_RNA_partial_sequence_gene,_partial_sequence
OM530254	Lenzites_betulinus	Polyporales	Lenzites_betulinus_isolate_MOGU_088-19_small_subunit_ribosomal_RNA_gene,_partial_sequence;_internal_transcribed_spacer_1,_5.8S_ribosomal_RNA_gene,_and_internal_transcribed_spacer_2,_complete_sequence;_and_large_subunit_ribosomal_RNA_gene,_partial_sequence
MK412592	Leucocoprinus_cretaceus	Agaricales	Leucocoprinus_cretaceus_voucher_HAW:JKS82_internal_transcribed_spacer_1,_partial_sequence;_5.8S_ribosomal_RNA_gene,_complete_sequence;_and_internal_transcribed_spacer_2,_partial_sequence
OM106913	Leucocoprinus_cretaceus	Agaricales	Leucocoprinus_cretaceus_voucher_JLF10042_small_subunit_ribosomal_RNA_gene,_partial_sequence;_internal_transcribed_spacer_1,_5.8S_ribosomal_RNA_gene,_and_internal_transcribed_spacer_2,_complete_sequence;_and_large_subunit_ribosomal_RNA_gene,_partial_sequence
MH016856	Leucocoprinus_fragilissimus	Agaricales	Leucocoprinus_fragilissimus_voucher_FLAS-F-60869_internal_transcribed_spacer_1,_partial_sequence;_5.8S_ribosomal_RNA_gene,_complete_sequence;_and_internal_transcribed_spacer_2,_partial_sequence
MW727701	Leucocoprinus_fragilissimus	Agaricales	Leucocoprinus_fragilissimus_voucher_ZMU070_internal_transcribed_spacer_1,_partial_sequence;_5.8S_ribosomal_RNA_gene_and_internal_transcribed_spacer_2,_complete_sequence;_and_large_subunit_ribosomal_RNA_gene,_partial_sequence
MK412587	Leucocoprinus_straminellus	Agaricales	Leucocoprinus_straminellus_voucher_HAW:JKS106_internal_transcribed_spacer_1,_partial_sequence;_5.8S_ribosomal_RNA_gene,_complete_sequence;_and_internal_transcribed_spacer_2,_partial_sequence
AF482870	Leucocoprinus_straminellus	Agaricales	Leucooprinus_straminellus_internal_transcribed_spacer_1,_partial_sequence;_5.8S_ribosomal_RNA_gene,_complete_sequence;_and_internal_transcribed_spacer_2,_partial_sequence
JQ409359	Lignosus_rhinocerotis	Polyporales	Lignosus_rhinocerotis_strain_PEN94_internal_transcribed_spacer_1,_partial_sequence;_5.8S_ribosomal_RNA_gene_and_internal_transcribed_spacer_2,_complete_sequence;_and_28S_ribosomal_RNA_gene,_partial_sequence
OK654578	Lignosus_rhinocerotis	Polyporales	Lignosus_rhinocerotis_voucher_AR3_internal_transcribed_spacer_1,_partial_sequence;_5.8S_ribosomal_RNA_gene_and_internal_transcribed_spacer_2,_complete_sequence;_and_large_subunit_ribosomal_RNA_gene,_partial_sequence
OM716811	Macrocybe_gigantea	Agaricales	Macrocybe_gigantea_isolate_BH4_internal_transcribed_spacer_1,_partial_sequence;_5.8S_ribosomal_RNA_gene_and_internal_transcribed_spacer_2,_complete_sequence;_and_large_subunit_ribosomal_RNA_gene,_partial_sequence
OM716803	Macrocybe_gigantea	Agaricales	Macrocybe_gigantea_isolate_SCAU3-5_small_subunit_ribosomal_RNA_gene,_partial_sequence;_internal_transcribed_spacer_1,_5.8S_ribosomal_RNA_gene,_and_internal_transcribed_spacer_2,_complete_sequence;_and_large_subunit_ribosomal_RNA_gene,_partial_sequence
MK817563	Marasmius_cladophyllus	Agaricales	Marasmius_cladophyllus_isolate_SFE3_small_subunit_ribosomal_RNA_gene,_partial_sequence;_internal_transcribed_spacer_1,_5.8S_ribosomal_RNA_gene,_and_internal_transcribed_spacer_2,_complete_sequence;_and_large_subunit_ribosomal_RNA_gene,_partial_sequence
MF156256	Marasmius_cladophyllus	Agaricales	Marasmius_cladophyllus_voucher_ECO-TA-HO_7875_small_subunit_ribosomal_RNA_gene,_partial_sequence;_internal_transcribed_spacer_1,_5.8S_ribosomal_RNA_gene,_and_internal_transcribed_spacer_2,_complete_sequence;_and_large_subunit_ribosomal_RNA_gene,_partial_sequence
AF335438	Marasmius_quercophilus	Agaricales	Marasmius_quercophilus_strain_2c_5.8S_ribosomal_RNA_gene,_partial_sequence;_internal_transcribed_spacer_2,_complete_sequence;_and_25S_ribosomal_RNA_gene,_partial_sequence
AF335435	Marasmius_quercophilus	Agaricales	Marasmius_quercophilus_strain_24_5.8S_ribosomal_RNA_gene,_partial_sequence;_internal_transcribed_spacer_2,_complete_sequence;_and_25S_ribosomal_RNA_gene,_partial_sequence
MH856418	Meripilus_giganteus	Polyporales	Meripilus_giganteus_culture_CBS:421.48_strain_CBS_421.48_small_subunit_ribosomal_RNA_gene,_partial_sequence;_internal_transcribed_spacer_1,_5.8S_ribosomal_RNA_gene,_and_internal_transcribed_spacer_2,_complete_sequence;_and_large_subunit_ribosomal_RNA_gene,_partial_sequence
GQ355959	Meripilus_giganteus	Polyporales	Meripilus_giganteus_strain_CBS_116.142_18S_ribosomal_RNA_gene,_partial_sequence;_internal_transcribed_spacer_1,_5.8S_ribosomal_RNA_gene,_and_internal_transcribed_spacer_2,_complete_sequence;_and_28S_ribosomal_RNA_gene,_partial_sequence
KJ995948	Neolentinus_lepideus	Gloeophyllales	Neolentinus_lepideus_culture-collection_CFMR:Mad-534-R_18S_ribosomal_RNA_gene,_partial_sequence;_internal_transcribed_spacer_1,_5.8S_ribosomal_RNA_gene,_and_internal_transcribed_spacer_2,_complete_sequence;_and_28S_ribosomal_RNA_gene,_partial_sequence
GQ337914	Neolentinus_lepideus	Gloeophyllales	Neolentinus_lepideus_culture-collection_DSM:3097_18S_ribosomal_RNA_gene,_partial_sequence;_internal_transcribed_spacer_1,_5.8S_ribosomal_RNA_gene,_and_internal_transcribed_spacer_2,_complete_sequence;_and_28S_ribosomal_RNA_gene,_partial_sequence
GQ892789	Oudemansiella_canarii	Agaricales	Oudemansiella_canarii_voucher_TENN58954_18S_ribosomal_RNA_gene,_partial_sequence;_internal_transcribed_spacer_1,_5.88S_ribosomal_RNA_gene,_and_internal_transcribed_spacer_2,_complete_sequence;_and_large_subunit_ribosomal_RNA_gene,_partial_sequence
GQ892796	Oudemansiella_canarii	Agaricales	Oudemansiella_canarii_voucher_TENN62801_clone_c2_18S_ribosomal_RNA_gene,_partial_sequence;_internal_transcribed_spacer_1,_5.88S_ribosomal_RNA_gene,_and_internal_transcribed_spacer_2,_complete_sequence;_and_large_subunit_ribosomal_RNA_gene,_partial_sequence
AY665176	Oudemansiella_radicata	Agaricales	Oudemansiella_radicata_isolate_HKAS42488_internal_transcribed_spacer_1,_partial_sequence;_5.8S_ribosomal_RNA_gene,_complete_sequence;_and_internal_transcribed_spacer_2,_partial_sequence
OR116482	Oudemansiella_reticulata	Agaricales	Oudemansiella_reticulata_voucher_MEL2363391_small_subunit_ribosomal_RNA_gene,_partial_sequence;_internal_transcribed_spacer_1,_5.8S_ribosomal_RNA_gene,_and_internal_transcribed_spacer_2,_complete_sequence;_and_large_subunit_ribosomal_RNA_gene,_partial_sequence
ON387630	Panus_rudis	Polyporales	Panus_rudis_strain_F01315_small_subunit_ribosomal_RNA_gene,_partial_sequence;_internal_transcribed_spacer_1,_5.8S_ribosomal_RNA_gene,_and_internal_transcribed_spacer_2,_complete_sequence;_and_large_subunit_ribosomal_RNA_gene,_partial_sequence
KU863050	Panus_rudis	Polyporales	Panus_rudis_voucher_ZJ1005DKJ03_internal_transcribed_spacer_1,_partial_sequence;_5.8S_ribosomal_RNA_gene_and_internal_transcribed_spacer_2,_complete_sequence;_and_28S_ribosomal_RNA_gene,_partial_sequence
MH856680	Peniophora_incarnata	Russulales	Peniophora_incarnata_culture_CBS:398.50_strain_CBS_398.50_small_subunit_ribosomal_RNA_gene,_partial_sequence;_internal_transcribed_spacer_1,_5.8S_ribosomal_RNA_gene,_and_internal_transcribed_spacer_2,_complete_sequence;_and_large_subunit_ribosomal_RNA_gene,_partial_sequence
MH484009	Peniophora_incarnata	Russulales	Peniophora_incarnata_isolate_BN20_internal_transcribed_spacer_1,_partial_sequence;_5.8S_ribosomal_RNA_gene_and_internal_transcribed_spacer_2,_complete_sequence;_and_large_subunit_ribosomal_RNA_gene,_partial_sequence
MH857620	Peniophora_lycii	Russulales	Peniophora_lycii_culture_CBS:260.56_strain_CBS_260.56_small_subunit_ribosomal_RNA_gene,_partial_sequence;_internal_transcribed_spacer_1,_5.8S_ribosomal_RNA_gene,_and_internal_transcribed_spacer_2,_complete_sequence;_and_large_subunit_ribosomal_RNA_gene,_partial_sequence
MZ325959	Peniophora_lycii	Russulales	Peniophora_lycii_strain_ICMP_16714_small_subunit_ribosomal_RNA_gene,_partial_sequence;_internal_transcribed_spacer_1,_5.8S_ribosomal_RNA_gene,_and_internal_transcribed_spacer_2,_complete_sequence;_and_large_subunit_ribosomal_RNA_gene,_partial_sequence
MT043771	Perenniporia_tephropora	Polyporales	Perenniporia_tephropora_isolate_B3148_internal_transcribed_spacer_1,_partial_sequence;_5.8S_ribosomal_RNA_gene_and_internal_transcribed_spacer_2,_complete_sequence;_and_large_subunit_ribosomal_RNA_gene,_partial_sequence
MZ540337	Perenniporia_tephropora	Polyporales	Perenniporia_tephropora_isolate_TN23_internal_transcribed_spacer_1,_partial_sequence;_5.8S_ribosomal_RNA_gene_and_internal_transcribed_spacer_2,_complete_sequence;_and_large_subunit_ribosomal_RNA_gene,_partial_sequence
AY219355	Phanerochaete_avellanea	Polyporales	Phanerochaete_avellanea_strain_FP-104126-sp_small_subunit_ribosomal_RNA_gene,_partial_sequence;_internal_transcribed_spacer_1,_5.8S_ribosomal_RNA_gene,_and_internal_transcribed_spacer_2,_complete_sequence;_and_25S_ribosomal_RNA_gene,_partial_sequence
ON243770	Phanerochaete_avellanea	Polyporales	Phanerochaete_avellanea_voucher_CLZhao_21383_small_subunit_ribosomal_RNA_gene,_partial_sequence;_internal_transcribed_spacer_1,_5.8S_ribosomal_RNA_gene,_and_internal_transcribed_spacer_2,_complete_sequence;_and_large_subunit_ribosomal_RNA_gene,_partial_sequence
KP135126	Phanerochaete_carnosa	Polyporales	Phanerochaete_carnosa_strain_FD-474_18S_ribosomal_RNA_gene,_partial_sequence;_internal_transcribed_spacer_1,_5.8S_ribosomal_RNA_gene,_and_internal_transcribed_spacer_2,_complete_sequence;_and_28S_ribosomal_RNA_gene,_partial_sequence
KP135128	Phanerochaete_carnosa	Polyporales	Phanerochaete_carnosa_strain_RLG-7412-Sp_18S_ribosomal_RNA_gene,_partial_sequence;_internal_transcribed_spacer_1,_5.8S_ribosomal_RNA_gene,_and_internal_transcribed_spacer_2,_complete_sequence;_and_28S_ribosomal_RNA_gene,_partial_sequence
KJ995952	Phanerochaete_chrysosporium	Polyporales	Phanerochaete_chrysosporium_culture-collection_CFMR:ME-446_18S_ribosomal_RNA_gene,_partial_sequence;_internal_transcribed_spacer_1,_5.8S_ribosomal_RNA_gene,_and_internal_transcribed_spacer_2,_complete_sequence;_and_28S_ribosomal_RNA_gene,_partial_sequence
GU733339	Phanerochaete_chrysosporium	Polyporales	Phanerochaete_chrysosporium_strain_CBS_153.67_18S_ribosomal_RNA_gene,_partial_sequence;_internal_transcribed_spacer_1,_5.8S_ribosomal_RNA_gene,_and_internal_transcribed_spacer_2,_complete_sequence;_and_28S_ribosomal_RNA_gene,_partial_sequence
AB519182	Phlebia_brevispora	Polyporales	Phlebia_brevispora_genes_for_ITS1,_5.8S_rRNA,_ITS2,_partial_and_complete_sequence
OP758156	Phlebia_brevispora	Polyporales	Phlebia_brevispora_strain_MPL-23_small_subunit_ribosomal_RNA_gene,_partial_sequence;_internal_transcribed_spacer_1_and_5.8S_ribosomal_RNA_gene,_complete_sequence;_and_internal_transcribed_spacer_2,_partial_sequence
HQ153411	Phlebia_chrysocreas	Polyporales	Phlebia_chrysocreas_isolate_FCUG2827_18S_ribosomal_RNA_gene,_partial_sequence;_internal_transcribed_spacer_1,_5.8S_ribosomal_RNA_gene,_and_internal_transcribed_spacer_2,_complete_sequence;_and_28S_ribosomal_RNA_gene,_partial_sequence
KJ668482	Phlebia_chrysocreas	Polyporales	Phlebia_chrysocreas_voucher_KUC20121123-24_18S_ribosomal_RNA_gene,_partial_sequence;_internal_transcribed_spacer_1,_5.8S_ribosomal_RNA_gene,_and_internal_transcribed_spacer_2,_complete_sequence;_and_28S_ribosomal_RNA_gene,_partial_sequence
MH857641	Phlebia_radiata	Polyporales	Phlebia_radiata_culture_CBS:284.56_strain_CBS_284.56_small_subunit_ribosomal_RNA_gene,_partial_sequence;_internal_transcribed_spacer_1,_5.8S_ribosomal_RNA_gene,_and_internal_transcribed_spacer_2,_complete_sequence;_and_large_subunit_ribosomal_RNA_gene,_partial_sequence
MK404484	Phlebia_radiata	Polyporales	Phlebia_radiata_voucher_CLZhao_4882_internal_transcribed_spacer_1,_partial_sequence;_5.8S_ribosomal_RNA_gene_and_internal_transcribed_spacer_2,_complete_sequence;_and_large_subunit_ribosomal_RNA_gene,_partial_sequence
MH856901	Pholiota_microspora	Agaricales	Pholiota_microspora_culture_CBS:360.51_strain_CBS_360.51_small_subunit_ribosomal_RNA_gene,_partial_sequence;_internal_transcribed_spacer_1,_5.8S_ribosomal_RNA_gene,_and_internal_transcribed_spacer_2,_complete_sequence;_and_large_subunit_ribosomal_RNA_gene,_partial_sequence
MW785154	Pholiota_microspora	Agaricales	Pholiota_microspora_strain_146_internal_transcribed_spacer_1,_partial_sequence;_5.8S_ribosomal_RNA_gene,_complete_sequence;_and_internal_transcribed_spacer_2,_partial_sequence
AY251304	Pholiota_nameko	Agaricales	Pholiota_nameko_18S_ribosomal_RNA_gene,_partial_sequence;_internal_transcribed_spacer_1,_5.8S_ribosomal_RNA_gene_and_internal_transcribed_spacer_2,_complete_sequence;_and_large_subunit_ribosomal_RNA_gene,_partial_sequence
MW748303	Pholiota_nameko	Agaricales	Pholiota_nameko_strain_IBK_2154_small_subunit_ribosomal_RNA_gene,_partial_sequence;_internal_transcribed_spacer_1,_5.8S_ribosomal_RNA_gene,_and_internal_transcribed_spacer_2,_complete_sequence;_and_large_subunit_ribosomal_RNA_gene,_partial_sequence
DQ491423	Fomitopsis_betulina	Polyporales	Piptoporus_betulinus_strain_CBS_378.51_18S_ribosomal_RNA_gene,_partial_sequence;_internal_transcribed_spacer_1,_5.8S_ribosomal_RNA_gene,_and_internal_transcribed_spacer_2,_complete_sequence;_and_28S_ribosomal_RNA_gene,_partial_sequence
KX787084	Pleurotus_citrinopileatus	Agaricales	Pleurotus_citrinopileatus_strain_CGMCC_3.7352_internal_transcribed_spacer_1,_partial_sequence;_5.8S_ribosomal_RNA_gene_and_internal_transcribed_spacer_2,_complete_sequence;_and_large_subunit_ribosomal_RNA_gene,_partial_sequence
KP867920	Pleurotus_citrinopileatus	Agaricales	Pleurotus_citrinopileatus_voucher_HKAS85965_internal_transcribed_spacer_1,_partial_sequence;_5.8S_ribosomal_RNA_gene_and_internal_transcribed_spacer_2,_complete_sequence;_and_28S_ribosomal_RNA_gene,_partial_sequence
AB115047	Pleurotus_djamor	Agaricales	Pleurotus_djamor_genes_for_18S_rRNA,_ITS1,_5.8S_rRNA,_ITS2,_large_subunit_ribosomal_RNA,_partial_and_complete_sequence,_strain:TFM-M-C905
EU424306	Pleurotus_djamor	Agaricales	Pleurotus_djamor_strain_CBS_667.97_18S_ribosomal_RNA_gene,_partial_sequence;_internal_transcribed_spacer_1,_5.8S_ribosomal_RNA_gene,_and_internal_transcribed_spacer_2,_complete_sequence;_and_28S_ribosomal_RNA_gene,_partial_sequence
MH854697	Pleurotus_eryngii	Agaricales	Pleurotus_eryngii_culture_CBS:130.21_strain_CBS_130.21_internal_transcribed_spacer_1,_partial_sequence;_5.8S_ribosomal_RNA_gene_and_internal_transcribed_spacer_2,_complete_sequence;_and_large_subunit_ribosomal_RNA_gene,_partial_sequence
FJ904743	Pleurotus_eryngii	Agaricales	Pleurotus_eryngii_isolate_20PL_internal_transcribed_spacer_1,_partial_sequence;_5.8S_ribosomal_RNA_gene_and_internal_transcribed_spacer_2,_complete_sequence;_and_28S_ribosomal_RNA_gene,_partial_sequence
MH854725	Pleurotus_ostreatus	Agaricales	Pleurotus_ostreatus_culture_CBS:145.22_strain_CBS_145.22_small_subunit_ribosomal_RNA_gene,_partial_sequence;_internal_transcribed_spacer_1,_5.8S_ribosomal_RNA_gene,_and_internal_transcribed_spacer_2,_complete_sequence;_and_large_subunit_ribosomal_RNA_gene,_partial_sequence
AB115040	Pleurotus_ostreatus	Agaricales	Pleurotus_ostreatus_genes_for_18S_rRNA,_ITS1,_5.8S_rRNA,_ITS2,_large_subunit_ribosomal_RNA,_partial_and_complete_sequence,_strain:ATCC_56534
OQ126732	Pleurotus_pulmonarius	Agaricales	Pleurotus_pulmonarius_culture_DMRP:364_internal_transcribed_spacer_1,_partial_sequence;_5.8S_ribosomal_RNA_gene_and_internal_transcribed_spacer_2,_complete_sequence;_and_large_subunit_ribosomal_RNA_gene,_partial_sequence
KX836284	Pleurotus_pulmonarius	Agaricales	Pleurotus_pulmonarius_voucher_Ce5_internal_transcribed_spacer_1,_partial_sequence;_5.8S_ribosomal_RNA_gene_and_internal_transcribed_spacer_2,_complete_sequence;_and_28S_ribosomal_RNA_gene,_partial_sequence
KY962452	Pleurotus_salmoneostramineus	Agaricales	Pleurotus_salmoneostramineus_isolate_P36_small_subunit_ribosomal_RNA_gene,_partial_sequence;_internal_transcribed_spacer_1,_5.8S_ribosomal_RNA_gene,_and_internal_transcribed_spacer_2,_complete_sequence;_and_large_subunit_ribosomal_RNA_gene,_partial_sequence
EU424318	Pleurotus_salmoneostramineus	Agaricales	Pleurotus_salmoneostramineus_strain_ACCC50964_18S_ribosomal_RNA_gene,_partial_sequence;_internal_transcribed_spacer_1,_5.8S_ribosomal_RNA_gene,_and_internal_transcribed_spacer_2,_complete_sequence;_and_28S_ribosomal_RNA_gene,_partial_sequence
KY962449	Pleurotus_sapidus	Agaricales	Pleurotus_sapidus_isolate_P33_small_subunit_ribosomal_RNA_gene,_partial_sequence;_internal_transcribed_spacer_1,_5.8S_ribosomal_RNA_gene,_and_internal_transcribed_spacer_2,_complete_sequence;_and_large_subunit_ribosomal_RNA_gene,_partial_sequence
JX429940	Pleurotus_sapidus	Agaricales	Pleurotus_sapidus_strain_FPSPT_18S_ribosomal_RNA_gene,_partial_sequence;_internal_transcribed_spacer_1,_5.8S_ribosomal_RNA_gene,_and_internal_transcribed_spacer_2,_complete_sequence;_and_28S_ribosomal_RNA_gene,_partial_sequence
KJ140677	Polyporus_alveolaris	Polyporales	Polyporus_alveoaris_voucher_CFMR:DLL2011-182_18S_ribosomal_RNA_gene,_partial_sequence;_internal_transcribed_spacer_1,_5.8S_ribosomal_RNA_gene,_and_internal_transcribed_spacer_2,_complete_sequence;_and_28S_ribosomal_RNA_gene,_partial_sequence
JX009173	Polyporus_alveolaris	Polyporales	Polyporus_alveolaris_strain_PM03_internal_transcribed_spacer_1,_partial_sequence;_5.8S_ribosomal_RNA_gene,_complete_sequence;_and_internal_transcribed_spacer_2,_partial_sequence
AB070880	Polyporus_ciliatus	Polyporales	Polyporus_ciliatus_genes_for_ITS1,_5.8S_rRNA,_ITS2,_28S_rRNA,_partial_and_complete_sequences,_strain:CulTENN7480_SBI_2
KC572022	Polyporus_ciliatus	Polyporales	Polyporus_ciliatus_voucher_Wei_1600_internal_transcribed_spacer_1,_partial_sequence;_5.8S_ribosomal_RNA_gene,_complete_sequence;_and_internal_transcribed_spacer_2,_partial_sequence
AB587628	Polyporus_grammocephalus	Polyporales	Polyporus_grammocephalus_genes_for_ITS1,_5.8S_rRNA,_ITS2,_partial_and_complete_sequence,_strain:_WD2379
MK961281	Polyporus_grammocephalus	Polyporales	Polyporus_grammocephalus_voucher_PUN9504_internal_transcribed_spacer_1,_partial_sequence;_5.8S_ribosomal_RNA_gene_and_internal_transcribed_spacer_2,_complete_sequence;_and_large_subunit_ribosomal_RNA_gene,_partial_sequence
MG515077	Polyporus_umbellatus	Polyporales	Polyporus_umbellatus_strain_P20_internal_transcribed_spacer_1,_partial_sequence;_5.8S_ribosomal_RNA_gene_and_internal_transcribed_spacer_2,_complete_sequence;_and_large_subunit_ribosomal_RNA_gene,_partial_sequence
KY389201	Polyporus_umbellatus	Polyporales	Polyporus_umbellatus_strain_Z11_18S_ribosomal_RNA_gene,_partial_sequence;_internal_transcribed_spacer_1,_5.8S_ribosomal_RNA_gene,_and_internal_transcribed_spacer_2,_complete_sequence;_and_28S_ribosomal_RNA_gene,_partial_sequence
MH856709	Postia_placenta	Polyporales	Postia_placenta_culture_CBS:460.50_strain_CBS_460.50_small_subunit_ribosomal_RNA_gene,_partial_sequence;_internal_transcribed_spacer_1,_5.8S_ribosomal_RNA_gene,_and_internal_transcribed_spacer_2,_complete_sequence;_and_large_subunit_ribosomal_RNA_gene,_partial_sequence
MZ159451	Postia_placenta	Polyporales	Postia_placenta_voucher_K(M):175179_small_subunit_ribosomal_RNA_gene,_partial_sequence;_internal_transcribed_spacer_1,_5.8S_ribosomal_RNA_gene,_and_internal_transcribed_spacer_2,_complete_sequence;_and_large_subunit_ribosomal_RNA_gene,_partial_sequence
MH861864	Psilocybe_cubensis	Agaricales	Psilocybe_cubensis_culture_CBS:140.85_strain_CBS_140.85_internal_transcribed_spacer_1,_partial_sequence;_5.8S_ribosomal_RNA_gene,_complete_sequence;_and_internal_transcribed_spacer_2,_partial_sequence
OP862798	Psilocybe_cubensis	Agaricales	Psilocybe_cubensis_isolate_MHHNU_31391_internal_transcribed_spacer_1,_partial_sequence;_5.8S_ribosomal_RNA_gene_and_internal_transcribed_spacer_2,_complete_sequence;_and_large_subunit_ribosomal_RNA_gene,_partial_sequence
MH855559	Punctularia_strigosozonata	Corticiales	Punctularia_strigosozonata_culture_CBS:345.34_strain_CBS_345.34_small_subunit_ribosomal_RNA_gene,_partial_sequence;_internal_transcribed_spacer_1,_5.8S_ribosomal_RNA_gene,_and_internal_transcribed_spacer_2,_complete_sequence;_and_large_subunit_ribosomal_RNA_gene,_partial_sequence
KU668972	Punctularia_strigosozonata	Corticiales	Punctularia_strigosozonata_voucher_CFMR:RF7JR_18S_ribosomal_RNA_gene,_partial_sequence;_internal_transcribed_spacer_1,_5.8S_ribosomal_RNA_gene,_and_internal_transcribed_spacer_2,_complete_sequence;_and_28S_ribosomal_RNA_gene,_partial_sequence
AF363761	Pycnoporus_coccineus	Polyporales	Pycnoporus_coccineus_strain_CBS_355.63_18S_ribosomal_RNA_gene,_partial_sequence;_internal_transcribed_spacer_1,_5.8S_ribosomal_RNA_gene_and_internal_transcribed_spacer_2,_complete_sequence;_and_28S_ribosomal_RNA_gene,_partial_sequence
FJ873395	Pycnoporus_coccineus	Polyporales	Pycnoporus_coccineus_strain_MUCL_38523_18S_ribosomal_RNA_gene,_partial_sequence;_internal_transcribed_spacer_1,_5.8S_ribosomal_RNA_gene,_and_internal_transcribed_spacer_2,_complete_sequence;_and_28S_ribosomal_RNA_gene,_partial_sequence
FJ234192	Pycnoporus_sanguineus	Polyporales	Pycnoporus_sanguineus_strain_CIRM-BRFM_901_18S_ribosomal_RNA_gene,_partial_sequence;_internal_transcribed_spacer_1,_5.8S_ribosomal_RNA_gene,_and_internal_transcribed_spacer_2,_complete_sequence;_and_28S_ribosomal_RNA_gene,_partial_sequence
HQ891293	Pycnoporus_sanguineus	Polyporales	Pycnoporus_sanguineus_strain_SYBC-L9_18S_ribosomal_RNA_gene,_partial_sequence;_internal_transcribed_spacer_1,_5.8S_ribosomal_RNA_gene,_and_internal_transcribed_spacer_2,_complete_sequence;_and_28S_ribosomal_RNA_gene,_partial_sequence
MH855397	Rigidoporus_microporus	Polyporales	Rigidoporus_microporus_culture_CBS:173.33_strain_CBS_173.33_small_subunit_ribosomal_RNA_gene,_partial_sequence;_internal_transcribed_spacer_1,_5.8S_ribosomal_RNA_gene,_and_internal_transcribed_spacer_2,_complete_sequence;_and_large_subunit_ribosomal_RNA_gene,_partial_sequence
HQ400707	Rigidoporus_microporus	Polyporales	Rigidoporus_microporus_isolate_FRIM641_internal_transcribed_spacer_1,_partial_sequence;_5.8S_ribosomal_RNA_gene_and_internal_transcribed_spacer_2,_complete_sequence;_and_28S_ribosomal_RNA_gene,_partial_sequence
FJ372688	Schizophyllum_commune	Agaricales	Schizophyllum_commune_isolate_BCC22128_18S_ribosomal_RNA_gene,_partial_sequence;_internal_transcribed_spacer_1,_5.8S_ribosomal_RNA_gene,_and_internal_transcribed_spacer_2,_complete_sequence;_and_28S_ribosomal_RNA_gene,_partial_sequence
HQ331063	Schizophyllum_commune	Agaricales	Schizophyllum_commune_strain_HJF048_internal_transcribed_spacer_1,_partial_sequence;_5.8S_ribosomal_RNA_gene_and_internal_transcribed_spacer_2,_complete_sequence;_and_28S_ribosomal_RNA_gene,_partial_sequence
GU066832	Serpula_himantioides	Boletales	Serpula_himantioides_internal_transcribed_spacer_1,_partial_sequence;_5.8S_ribosomal_RNA_gene,_complete_sequence;_and_internal_transcribed_spacer_2,_partial_sequence
AJ557351	Serpula_himantioides	Boletales	Serpula_himantioides_ITS1,_5.8S_rRNA_gene,_and_ITS2,_isolate_SH47
MH855422	Serpula_lacrymans	Boletales	Serpula_lacrymans_culture_CBS:235.33_strain_CBS_235.33_small_subunit_ribosomal_RNA_gene,_partial_sequence;_internal_transcribed_spacer_1_and_5.8S_ribosomal_RNA_gene,_complete_sequence;_and_internal_transcribed_spacer_2,_partial_sequence
MH862339	Serpula_lacrymans	Boletales	Serpula_lacrymans_culture_CBS:829.91_strain_CBS_829.91_small_subunit_ribosomal_RNA_gene,_partial_sequence;_internal_transcribed_spacer_1,_5.8S_ribosomal_RNA_gene,_and_internal_transcribed_spacer_2,_complete_sequence;_and_large_subunit_ribosomal_RNA_gene,_partial_sequence
FJ798705	Steccherinum_murashkinskyi	Polyporales	Steccherinum_murashkinskyi_strain_1963_18S_ribosomal_RNA_gene,_partial_sequence;_internal_transcribed_spacer_1,_5.8S_ribosomal_RNA_gene,_and_internal_transcribed_spacer_2,_complete_sequence;_and_28S_ribosomal_RNA_gene,_partial_sequence
MK269279	Steccherinum_murashkinskyi	Polyporales	Steccherinum_murashkinskyi_voucher_CLZhao_3669_internal_transcribed_spacer_1,_partial_sequence;_5.8S_ribosomal_RNA_gene_and_internal_transcribed_spacer_2,_complete_sequence;_and_large_subunit_ribosomal_RNA_gene,_partial_sequence
MH857595	Steccherinum_ochraceum	Polyporales	Steccherinum_ochraceum_culture_CBS:228.56_strain_CBS_228.56_small_subunit_ribosomal_RNA_gene,_partial_sequence;_internal_transcribed_spacer_1,_5.8S_ribosomal_RNA_gene,_and_internal_transcribed_spacer_2,_complete_sequence;_and_large_subunit_ribosomal_RNA_gene,_partial_sequence
KY321175	Steccherinum_ochraceum	Polyporales	Steccherinum_ochraceum_strain_LE-BIN_2134_small_subunit_ribosomal_RNA_gene,_partial_sequence;_internal_transcribed_spacer_1,_5.8S_ribosomal_RNA_gene,_and_internal_transcribed_spacer_2,_complete_sequence;_and_large_subunit_ribosomal_RNA_gene,_partial_sequence
AY854063	Stereum_hirsutum	Russulales	Stereum_hirsutum_isolate_AFTOL-ID_492_18S_ribosomal_RNA_gene,_partial_sequence;_internal_transcribed_spacer_1,_5.8S_ribosomal_RNA_gene,_and_internal_transcribed_spacer_2,_complete_sequence;_and_25S_ribosomal_RNA_gene,_partial_sequence
KP985742	Stereum_hirsutum	Russulales	Stereum_hirsutum_strain_BS7_18S_ribosomal_RNA_gene,_partial_sequence;_internal_transcribed_spacer_1,_5.8S_ribosomal_RNA_gene,_and_internal_transcribed_spacer_2,_complete_sequence;_and_28S_ribosomal_RNA_gene,_partial_sequence
MW492533	Stropharia_aeruginosa	Agaricales	Stropharia_aeruginosa_isolate_4789_internal_transcribed_spacer_1,_partial_sequence;_5.8S_ribosomal_RNA_gene_and_internal_transcribed_spacer_2,_complete_sequence;_and_large_subunit_ribosomal_RNA_gene,_partial_sequence
MH697848	Stropharia_aeruginosa	Agaricales	Stropharia_aeruginosa_voucher_S7_internal_transcribed_spacer_1,_partial_sequence;_5.8S_ribosomal_RNA_gene_and_internal_transcribed_spacer_2,_complete_sequence;_and_large_subunit_ribosomal_RNA_gene,_partial_sequence
MH855203	Thanatephorus_cucumeris	Cantharellales	Thanatephorus_cucumeris_culture_CBS:251.31_strain_CBS_251.31_small_subunit_ribosomal_RNA_gene,_partial_sequence;_internal_transcribed_spacer_1,_5.8S_ribosomal_RNA_gene,_and_internal_transcribed_spacer_2,_complete_sequence;_and_large_subunit_ribosomal_RNA_gene,_partial_sequence
MH855798	Thanatephorus_cucumeris	Cantharellales	Thanatephorus_cucumeris_culture_CBS:280.36_strain_CBS_280.36_small_subunit_ribosomal_RNA_gene,_partial_sequence;_internal_transcribed_spacer_1,_5.8S_ribosomal_RNA_gene,_and_internal_transcribed_spacer_2,_complete_sequence;_and_large_subunit_ribosomal_RNA_gene,_partial_sequence
JN645087	Trametes_cinnabarina	Polyporales	Trametes_cinnabarina_culture-collection_MUCL:30555_internal_transcribed_spacer_1_partial_sequence,_partial_sequence;_5.8S_ribosomal_RNA_gene_and_internal_transcribed_spacer_2,_complete_sequence;_and_28S_ribosomal_RNA_partial_sequence_gene,_partial_sequence
KY322580	Trametes_cinnabarina	Polyporales	Trametes_cinnabarina_isolate_KK5.4_small_subunit_ribosomal_RNA_gene,_partial_sequence;_internal_transcribed_spacer_1_and_5.8S_ribosomal_RNA_gene,_complete_sequence;_and_internal_transcribed_spacer_2,_partial_sequence
MK463718	Trametes_coccinea	Polyporales	Trametes_coccinea_isolate_UQ6883_internal_transcribed_spacer_1,_partial_sequence;_5.8S_ribosomal_RNA_gene_and_internal_transcribed_spacer_2,_complete_sequence;_and_large_subunit_ribosomal_RNA_gene,_partial_sequence
MW554050	Trametes_coccinea	Polyporales	Trametes_coccinea_voucher_110118MFBPZH0570_internal_transcribed_spacer_1,_partial_sequence;_5.8S_ribosomal_RNA_gene_and_internal_transcribed_spacer_2,_complete_sequence;_and_large_subunit_ribosomal_RNA_gene,_partial_sequence
MH855141	Trametes_gibbosa	Polyporales	Trametes_gibbosa_culture_CBS:284.30_strain_CBS_284.30_small_subunit_ribosomal_RNA_gene,_partial_sequence;_internal_transcribed_spacer_1,_5.8S_ribosomal_RNA_gene,_and_internal_transcribed_spacer_2,_complete_sequence;_and_large_subunit_ribosomal_RNA_gene,_partial_sequence
JX082344	Trametes_gibbosa	Polyporales	Trametes_gibbosa_strain_BRFM_983_internal_transcribed_spacer_1,_partial_sequence;_5.8S_ribosomal_RNA_gene_and_internal_transcribed_spacer_2,_complete_sequence;_and_28S_ribosomal_RNA_gene,_partial_sequence
MH860685	Trametes_hirsuta	Polyporales	Trametes_hirsuta_culture_CBS:282.73_strain_CBS_282.73_small_subunit_ribosomal_RNA_gene,_partial_sequence;_internal_transcribed_spacer_1,_5.8S_ribosomal_RNA_gene,_and_internal_transcribed_spacer_2,_complete_sequence;_and_large_subunit_ribosomal_RNA_gene,_partial_sequence
ON075121	Trametes_hirsuta	Polyporales	Trametes_hirsuta_isolate_MIAE07999_internal_transcribed_spacer_1,_partial_sequence;_5.8S_ribosomal_RNA_gene,_complete_sequence;_and_internal_transcribed_spacer_2,_partial_sequence
MH855442	Trametes_ochracea	Polyporales	Trametes_ochracea_culture_CBS:287.33_strain_CBS_287.33_small_subunit_ribosomal_RNA_gene,_partial_sequence;_internal_transcribed_spacer_1,_5.8S_ribosomal_RNA_gene,_and_internal_transcribed_spacer_2,_complete_sequence;_and_large_subunit_ribosomal_RNA_gene,_partial_sequence
FJ349624	Trametes_ochracea	Polyporales	Trametes_ochracea_strain_CIRM-BRFM_632_internal_transcribed_spacer_1,_partial_sequence;_and_5.8S_ribosomal_RNA_gene_and_internal_transcribed_spacer_2,_complete_sequence
MH855813	Trametes_polyzona	Polyporales	Trametes_polyzona_culture_CBS:319.36_strain_CBS_319.36_internal_transcribed_spacer_1,_partial_sequence;_5.8S_ribosomal_RNA_gene_and_internal_transcribed_spacer_2,_complete_sequence;_and_large_subunit_ribosomal_RNA_gene,_partial_sequence
MZ735438	Trametes_polyzona	Polyporales	Trametes_polyzona_isolate_DQS71F_small_subunit_ribosomal_RNA_gene,_partial_sequence;_internal_transcribed_spacer_1,_5.8S_ribosomal_RNA_gene,_and_internal_transcribed_spacer_2,_complete_sequence;_and_large_subunit_ribosomal_RNA_gene,_partial_sequence
JN645080	Trametes_pubescens	Polyporales	Trametes_pubescens_culture-collection_CBS:696.94_internal_transcribed_spacer_1_partial_sequence,_partial_sequence;_5.8S_ribosomal_RNA_gene_and_internal_transcribed_spacer_2,_complete_sequence;_and_28S_ribosomal_RNA_partial_sequence_gene,_partial_sequence
MT232656	Trametes_pubescens	Polyporales	Trametes_pubescens_strain_MT-17.24_internal_transcribed_spacer_1,_partial_sequence;_5.8S_ribosomal_RNA_gene_and_internal_transcribed_spacer_2,_complete_sequence;_and_large_subunit_ribosomal_RNA_gene,_partial_sequence
JN645095	Trametes_punicea	Polyporales	Trametes_punicea_culture-collection_MUCL:47087_internal_transcribed_spacer_1_partial_sequence,_partial_sequence;_5.8S_ribosomal_RNA_gene_and_internal_transcribed_spacer_2,_complete_sequence;_and_28S_ribosomal_RNA_partial_sequence_gene,_partial_sequence
KY449389	Trametes_punicea	Polyporales	Trametes_punicea_isolate_IRET45_internal_transcribed_spacer_1,_partial_sequence;_5.8S_ribosomal_RNA_gene_and_internal_transcribed_spacer_2,_complete_sequence;_and_large_subunit_ribosomal_RNA_gene,_partial_sequence
MT584659	Trametes_sanguinea	Polyporales	Trametes_sanguinea_isolate_IS13_small_subunit_ribosomal_RNA_gene,_partial_sequence;_internal_transcribed_spacer_1,_5.8S_ribosomal_RNA_gene,_and_internal_transcribed_spacer_2,_complete_sequence;_and_large_subunit_ribosomal_RNA_gene,_partial_sequence
OP758139	Trametes_sanguinea	Polyporales	Trametes_sanguinea_strain_GC-C14_small_subunit_ribosomal_RNA_gene,_partial_sequence;_internal_transcribed_spacer_1_and_5.8S_ribosomal_RNA_gene,_complete_sequence;_and_internal_transcribed_spacer_2,_partial_sequence
MH855012	Trametes_suaveolens	Polyporales	Trametes_suaveolens_culture_CBS:279.28_strain_CBS_279.28_small_subunit_ribosomal_RNA_gene,_partial_sequence;_internal_transcribed_spacer_1,_5.8S_ribosomal_RNA_gene,_and_internal_transcribed_spacer_2,_complete_sequence;_and_large_subunit_ribosomal_RNA_gene,_partial_sequence
ON402824	Trametes_suaveolens	Polyporales	Trametes_suaveolens_isolate_KMRB14101203_internal_transcribed_spacer_1,_partial_sequence;_5.8S_ribosomal_RNA_gene_and_internal_transcribed_spacer_2,_complete_sequence;_and_large_subunit_ribosomal_RNA_gene,_partial_sequence
EU661886	Trametes_velutina	Polyporales	Trametes_velutina_strain_CFCC_81039_18S_ribosomal_RNA_gene,_partial_sequence;_internal_transcribed_spacer_1,_5.8S_ribosomal_RNA_gene,_and_internal_transcribed_spacer_2,_complete_sequence;_and_28S_ribosomal_RNA_gene,_partial_sequence
KC848273	Trametes_velutina	Polyporales	Trametes_velutina_voucher_Dai10149_internal_transcribed_spacer_1,_partial_sequence;_5.8S_ribosomal_RNA_gene_and_internal_transcribed_spacer_2,_complete_sequence;_and_25S_large_subunit_ribosomal_RNA_gene,_partial_sequence
DQ674379	Trametes_versicolor	Polyporales	Trametes_versicolor_CBS:122155_18S_ribosomal_RNA_gene,_partial_sequence;_internal_transcribed_spacer_1,_5.8S_ribosomal_RNA_gene,_and_internal_transcribed_spacer_2,_complete_sequence;_and_28S_ribosomal_RNA_gene,_partial_sequence
MH855444	Trametes_versicolor	Polyporales	Trametes_versicolor_culture_CBS:296.33_strain_CBS_296.33_small_subunit_ribosomal_RNA_gene,_partial_sequence;_internal_transcribed_spacer_1,_5.8S_ribosomal_RNA_gene,_and_internal_transcribed_spacer_2,_complete_sequence;_and_large_subunit_ribosomal_RNA_gene,_partial_sequence
MH859898	Trametes_villosa	Polyporales	Trametes_villosa_culture_CBS:678.70_strain_CBS_678.70_internal_transcribed_spacer_1,_partial_sequence;_5.8S_ribosomal_RNA_gene,_complete_sequence;_and_internal_transcribed_spacer_2,_partial_sequence
KF573031	Trametes_villosa	Polyporales	Trametes_villosa_voucher_AJ496_18S_ribosomal_RNA_gene,_partial_sequence;_internal_transcribed_spacer_1,_5.8S_ribosomal_RNA_gene,_and_internal_transcribed_spacer_2,_complete_sequence;_and_28S_ribosomal_RNA_gene,_partial_sequence
MW855597	Trichaptum_abietinum	Hymenochaetales	Trichaptum_abietinum_isolate_HBAU15198_internal_transcribed_spacer_1,_partial_sequence;_5.8S_ribosomal_RNA_gene_and_internal_transcribed_spacer_2,_complete_sequence;_and_large_subunit_ribosomal_RNA_gene,_partial_sequence
MK801344	Trichaptum_abietinum	Hymenochaetales	Trichaptum_abietinum_isolate_P54_small_subunit_ribosomal_RNA_gene,_partial_sequence;_internal_transcribed_spacer_1_and_5.8S_ribosomal_RNA_gene,_complete_sequence;_and_internal_transcribed_spacer_2,_partial_sequence
MZ725478	Volvariella_volvacea	Agaricales	Volvariella_volvacea_isolate_BP10_internal_transcribed_spacer_1,_partial_sequence;_5.8S_ribosomal_RNA_gene,_complete_sequence;_and_internal_transcribed_spacer_2,_partial_sequence
FJ545242	Volvariella_volvacea	Agaricales	Volvariella_volvacea_strain_ATCC_56903_internal_transcribed_spacer_1,_partial_sequence;_5.8S_ribosomal_RNA_gene_and_internal_transcribed_spacer_2,_complete_sequence;_and_28S_ribosomal_RNA_gene,_partial_sequence
OL763354	Wolfiporia_cocos	Polyporales	Wolfiporia_cocos_isolate_PB05_internal_transcribed_spacer_1,_partial_sequence;_5.8S_ribosomal_RNA_gene,_complete_sequence;_and_internal_transcribed_spacer_2,_partial_sequence
MH920359	Wolfiporia_cocos	Polyporales	Wolfiporia_cocos_strain_PC6-2_internal_transcribed_spacer_1,_partial_sequence;_5.8S_ribosomal_RNA_gene,_complete_sequence;_and_internal_transcribed_spacer_2,_partial_sequence
